# Supplementary material
Source: publisher figshare collection journal article supplement (https://diabetesjournals.figshare.com/ndownloader/files/28641789)
Supplement: Supplementary file 1 [file 28641789]

## Sheet: Training Set
Supplement Table 2: Z-score standardized median and interquartile range of the measured lipids in slow and rapid decliners of eGFR in the training subset
Lipids		All Slow Decliners, n=284			All Rapid-Decliners, n=123		All Rapid vs Slow Decliners
		Percentiles			Percentiles
	25	50	75	25	50	75	p value	FDR
FFA(20:2)	-0.847392	-0.090875	0.626927	-0.07978	0.54825	0.95158	2.0891e-06	0.00067687
TAG58:8	-0.563732	0.02016	0.763983	-0.89835	-0.21726	0.3959	1.3662e-05	0.001119
CE(22:6)	-0.448545	0.200075	0.772077	-1.1143	-0.16841	0.31765	1.3815e-05	0.001119
PE(P-18:0/20:5)	-0.651582	0.075115	0.909035	-0.99165	-0.47131	0.47664	1.1053e-05	0.001119
FFA(18:2)	-0.854335	-0.12631	0.664485	-0.30731	0.41469	0.91362	4.1863e-05	0.0016125
FFA(24:3)	-0.79915	-0.14419	0.654837	-0.10608	0.46733	0.95683	3.3206e-05	0.0016125
PC(16:0/22:6)	-0.492437	0.088595	0.880273	-1.04949	-0.45269	0.52003	2.8514e-05	0.0016125
TAG58:9	-0.580285	0.00143	0.74877	-0.8732	-0.23092	0.4489	4.5511e-05	0.0016125
TAG60:12	-0.64792	0.080185	0.817133	-1.05125	-0.24855	0.46782	3.7868e-05	0.0016125
CE(20:5)	-0.618672	0.133685	0.858115	-0.90812	-0.3064	0.35135	4.9768e-05	0.0016125
PC(18:0/20:0)	-0.545608	0.091275	0.854322	-0.99953	-0.32259	0.4821	5.7738e-05	0.0016873
PC(18:2/20:5)	-0.456412	0.10683	0.8457	-0.85739	-0.25319	0.30018	6.2491e-05	0.0016873
PE(18:0/20:5)	-0.597445	0.194335	0.8253	-0.96157	-0.44798	0.3684	6.8907e-05	0.0017174
PC(16:0/20:5)	-0.724335	0.198305	0.860445	-0.97927	-0.39894	0.32394	0.00012304	0.0026282
PC(18:0/22:6)	-0.523615	0.13823	0.848507	-1.01492	-0.43454	0.55508	0.00013231	0.0026282
TAG60:11	-0.63947	0.005905	0.85503	-0.98771	-0.31737	0.44143	0.00011842	0.0026282
PE(P-18:1/20:5)	-0.642585	0.025975	0.891935	-0.85969	-0.43138	0.36122	0.00014561	0.0026282
AC3:0	-0.48148	0.014865	0.797825	-0.66108	-0.24466	0.29826	0.00014601	0.0026282
TAG60:10	-0.593675	0.07055	0.827172	-0.96308	-0.25345	0.45039	0.00016606	0.0028318
TAG58:10	-0.68009	-0.00587	0.772898	-0.99202	-0.20756	0.54573	0.00018632	0.0030183
PE(18:0/18:0)	-0.550207	0.051455	0.7579	-0.95324	-0.26124	0.38993	0.00019728	0.0030438
FFA(24:2)	-0.79865	0.106765	0.663118	-0.20546	0.45476	0.96035	0.00029148	0.0040625
PC(18:0/20:5)	-0.721503	0.088815	0.756073	-1.03991	-0.47038	0.32368	0.00031346	0.0040625
PE(P-16:0/20:5)	-0.698307	0.206955	0.901578	-0.9284	-0.4422	0.36297	0.00028655	0.0040625
PE(P-18:1/22:6)	-0.378563	0.101655	0.75058	-0.83183	-0.16356	0.49277	0.00031215	0.0040625
TAG56:8	-0.57535	0.003555	0.748023	-0.93117	-0.21704	0.47699	0.00036015	0.004488
PC(18:1/20:5)	-0.485935	0.07912	0.76902	-0.75709	-0.28382	0.13581	0.00041522	0.0049827
TAG58:7	-0.554535	-0.036815	0.75278	-0.73263	-0.2186	0.3915	0.00044133	0.0051068
LPC(22:4)	-0.729742	-0.063855	0.56419	-0.24151	0.34122	1.01251	0.00049959	0.0053955
AC5:0	-0.551192	0.14914	0.66136	-0.91236	-0.33254	0.28238	0.00048402	0.0053955
TAG56:7	-0.554438	0.05985	0.735038	-0.85131	-0.29022	0.48542	0.00060771	0.0063515
TAG54:8	-0.619815	0.00547	0.762487	-0.97193	-0.24575	0.47752	0.00077613	0.0078583
TAG50:4	-0.50821	0.13961	0.729385	-0.89724	-0.08054	0.48303	0.00093091	0.0088711
TAG54:1	-0.491928	0.055305	0.64361	-0.93434	-0.15331	0.43289	0.00092025	0.0088711
TAG56:9	-0.65667	0.03321	0.76008	-0.87935	-0.23814	0.5213	0.0010247	0.0093738
PE(P-18:0/22:6)	-0.5932	0.135665	0.77067	-1.11169	-0.15934	0.49372	0.0010415	0.0093738
LPC(20:5)	-0.60529	0.1455	0.723688	-0.89134	-0.31099	0.36382	0.001091	0.0095537
PC(18:2/22:6)	-0.476255	0.068335	0.775913	-0.83727	-0.28566	0.35795	0.0011407	0.0097263
FFA(14:0)	-0.492422	0.11636	0.818865	-0.77982	-0.16045	0.52519	0.0011984	0.009956
FFA(18:1)	-0.842627	0.04075	0.705035	-0.32934	0.35143	0.94584	0.0012734	0.010314
FFA(18:0)	-0.595165	0.15719	0.924822	-0.91538	-0.17988	0.4376	0.0013679	0.010761
PC(16:1/18:1)	-0.834963	-0.175275	0.48808	-0.34388	0.13083	0.77969	0.0013949	0.010761
TAG42:2	-0.601317	0.174455	0.83053	-0.87989	-0.17772	0.47998	0.0014988	0.011293
SM(d18:1/26:1)	-0.63434	0.02772	0.81688	-0.87654	-0.21759	0.35037	0.001842	0.013564
TAG52:3	-0.669375	-0.01337	0.566165	-0.33085	0.31034	0.88251	0.0021604	0.015184
PE(18:0/22:6)	-0.559185	0.24776	0.68486	-1.03538	-0.28241	0.51398	0.0021329	0.015184
AC20:3	-0.681045	-0.03964	0.529983	-0.41965	0.29346	0.94373	0.0022027	0.015184
PC(14:0/20:5)	-0.65497	0.09964	0.782417	-0.82915	-0.31119	0.40438	0.0024647	0.016361
AC20:2	-0.619745	0.01685	0.56713	-0.31029	0.17676	0.87019	0.0024743	0.016361
TAG56:6	-0.524185	0.161675	0.696375	-0.84371	-0.06999	0.52795	0.0033158	0.021487
PE(18:1/16:1)	-0.4781	0.171915	0.704192	-0.82035	-0.10911	0.45065	0.0037961	0.023863
PE(P-18:1/22:4)	-0.717265	-0.21942	0.583908	-0.53433	0.55654	1.017	0.0038298	0.023863
AC4:0	-0.534218	0.05275	0.625657	-0.88997	-0.24719	0.53047	0.004196	0.025651
TAG58:6	-0.493943	0.059315	0.589295	-0.78699	-0.04912	0.53134	0.0046252	0.027751
PE(O-16:0/22:6)	-0.380748	0.20868	0.713873	-0.86118	-0.03139	0.53083	0.0048364	0.028491
TAG44:3	-0.5656	0.091345	0.888082	-0.78705	-0.14342	0.42304	0.0053272	0.030822
SM(d18:1/24:1)	-0.609465	0.05443	0.78905	-0.91951	-0.22828	0.38197	0.0055687	0.031654
LPC(22:6)	-0.472265	0.174065	0.72106	-0.82633	-0.23005	0.4983	0.0057714	0.03172
PE(O-16:0/20:5)	-0.62369	0.11175	0.729792	-0.69602	-0.22446	0.3542	0.0057879	0.03172
PE(P-16:0/22:6)	-0.482602	0.18283	0.788955	-0.8592	-0.10095	0.45262	0.0058741	0.03172
PC(18:1/22:4)	-0.865622	-0.20859	0.735522	-0.55445	0.42109	0.91591	0.0066033	0.034508
PE(18:0/20:1)	-0.611515	0.084345	0.73515	-0.84092	-0.18519	0.38518	0.0065489	0.034508
TAG48:5	-0.560865	0.093795	0.625062	-0.83383	-0.12613	0.39334	0.0070724	0.035804
TAG54:7	-0.56604	-0.004405	0.741557	-0.80849	-0.15093	0.54103	0.0070133	0.035804
SM(d18:1/26:0)	-0.56718	0.023365	0.650373	-0.86425	-0.10922	0.28701	0.0072918	0.036347
PE(16:0/22:6)	-0.545375	0.15702	0.79297	-0.87873	-0.1911	0.52451	0.0085196	0.041363
PE(18:1/22:6)	-0.479137	0.188025	0.753117	-0.76378	-0.1281	0.4361	0.0085535	0.041363
PE(O-16:0/22:4)	-0.633045	0.03348	0.667502	-0.49863	0.41036	0.90898	0.0093355	0.043836
AC20:4	-0.632088	-0.02835	0.504983	-0.44505	0.19485	0.93027	0.0092036	0.043836
PE(P-18:0/22:4)	-0.814782	-0.07618	0.575133	-0.47945	0.21418	0.77132	0.010278	0.047573
PE(O-18:0/20:5)	-0.508095	-0.027255	0.78288	-0.76806	-0.18008	0.40708	0.011159	0.050922
AC18:2	-0.708725	0.00023	0.621467	-0.39825	0.28832	0.82679	0.011327	0.050972
TAG46:4	-0.688137	0.10551	0.838882	-0.76216	-0.23524	0.43577	0.011495	0.051017
PE(P-18:1/20:3)	-0.777262	-0.027485	0.60214	-0.55039	0.21913	0.85998	0.012429	0.054417
TAG44:2	-0.706105	0.099715	0.813695	-0.82584	-0.16464	0.49142	0.013356	0.057073
AC18:1	-0.675588	-0.09458	0.566828	-0.34985	0.25065	0.74412	0.013388	0.057073
PE(O-18:0/22:6)	-0.505805	0.12983	0.6342	-0.92211	0.01467	0.59194	0.013872	0.05837
PE(16:0/20:5)	-0.59278	0.09944	0.760393	-0.74394	-0.18942	0.31302	0.016537	0.068693
PE(P-18:0/16:1)	-0.65511	-0.094335	0.523463	-0.34375	0.13756	0.79447	0.017931	0.073539
PE(P-16:0/22:4)	-0.70331	-0.0243	0.564627	-0.54822	0.18633	0.87297	0.019152	0.077564
PE(O-18:0/20:4)	-0.79941	-0.066285	0.534478	-0.43838	0.13454	0.70488	0.019945	0.079781
PC(16:0/20:1)	-0.594485	0.09349	0.68777	-0.86656	-0.17747	0.4439	0.020537	0.081148
PC(14:0/22:5)	-0.50394	0.26541	0.754482	-0.77568	-0.12656	0.65904	0.020836	0.081334
FFA(20:1)	-0.64474	0.013075	0.468615	-0.44171	0.22722	0.78832	0.0225	0.085193
LPC(20:1)	-0.572497	-0.10674	0.668362	-0.69997	-0.21731	0.35553	0.022812	0.085193
PC(16:0/22:4)	-0.721245	-9e-05	0.632628	-0.35118	0.19824	0.79873	0.023402	0.085193
TAG46:3	-0.626185	0.010695	0.839793	-0.76924	-0.22564	0.46102	0.022088	0.085193
PE(P-18:0/18:2)	-0.712355	-0.080705	0.63217	-0.40129	0.10997	0.79996	0.023251	0.085193
AC12:1	-0.775815	-0.01764	0.710747	-0.3911	0.17531	0.90375	0.023211	0.085193
TAG54:6	-0.629533	0.045895	0.670693	-0.78715	-0.18043	0.45067	0.024473	0.088103
PC(18:2/20:1)	-0.488407	0.22828	0.75126	-0.75199	0.00492	0.47955	0.026465	0.093071
TAG52:6	-0.604927	0.071475	0.74884	-0.78187	-0.11719	0.4752	0.026318	0.093071
PE(18:0/22:5)	-0.598245	0.087025	0.723217	-0.78209	-0.23486	0.40367	0.027002	0.093071
PE(18:1/18:1)	-0.482305	0.086105	0.69368	-0.8906	-0.16476	0.33623	0.02698	0.093071
PC(18:1/18:3)	-0.683817	-0.043155	0.585943	-0.46405	0.27335	0.76664	0.028169	0.09607
TAG40:0	-0.772402	0.04347	0.874103	-0.87743	-0.16173	0.66787	0.031021	0.1047
TAG42:0	-0.760977	0.139005	0.853683	-0.93158	-0.24806	0.73437	0.033996	0.11355
PE(14:0/20:4)	-0.562775	0.136615	0.813135	-0.78779	-0.02204	0.52031	0.036625	0.11986
PE(P-18:0/22:5)	-0.696708	-0.078995	0.618585	-0.47794	0.09805	0.83144	0.036355	0.11986
PE(O-18:0/20:3)	-0.748228	-0.125945	0.642302	-0.62546	0.12084	0.69676	0.037738	0.12227
LPC(20:3)	-0.616915	-0.0104	0.64331	-0.33462	0.18926	0.67208	0.038164	0.12243
TAG44:1	-0.731535	0.1607	0.855845	-0.7665	-0.14342	0.52886	0.039242	0.12465
PC(14:0/22:6)	-0.536045	0.15916	0.732995	-0.69986	-0.21747	0.49603	0.041363	0.13011
PE(O-18:0/22:5)	-0.630645	0.004095	0.54464	-0.55557	0.20802	0.95823	0.042348	0.13193
TAG42:1	-0.72331	0.156395	0.85051	-0.86197	-0.12186	0.64409	0.04441	0.13704
PC(18:0/22:4)	-0.675025	0.048215	0.59417	-0.31111	0.21203	0.83397	0.046417	0.14055
PE(O-18:0/22:4)	-0.700022	-0.0238	0.62962	-0.33796	0.15189	0.6424	0.046358	0.14055
TAG44:0	-0.72465	0.12807	0.788	-0.87712	-0.16388	0.64953	0.048246	0.14474
AC16:1	-0.65321	-0.079885	0.61441	-0.45571	0.1043	0.71238	0.050604	0.15042
SM(d18:1/24:0)	-0.55423	0.014195	0.715287	-0.94958	-0.1481	0.64663	0.051465	0.15159
CE(18:1)	-0.638815	0.026975	0.623648	-0.66058	-0.11469	0.75717	0.053874	0.15725
PC(18:2/20:3)	-0.708692	0.015805	0.643185	-0.39562	0.23983	0.85492	0.057681	0.16686
TAG50:5	-0.70664	0.08832	0.775525	-0.7391	-0.16383	0.43559	0.058246	0.16701
TAG50:2	-0.725605	-0.04445	0.607383	-0.50957	0.10045	0.81939	0.060807	0.17282
L_Carnitine	-0.589917	0.175515	0.797637	-0.84499	-0.25048	0.64516	0.066834	0.1883
PE(P-16:0/16:0)	-0.796365	-0.008725	0.64656	-0.49668	0.17424	0.69581	0.068807	0.19218
PC(16:0/16:1)	-0.683675	-0.20417	0.479225	-0.60625	0.01428	0.78259	0.070731	0.19587
FFA(24:1)	-0.497855	0.165325	0.807488	-0.72067	-0.03814	0.64586	0.071947	0.19589
LPC(20:0)	-0.53732	0.028075	0.727283	-0.67804	-0.10664	0.43614	0.071399	0.19589
AC14:2	-0.765435	-0.102025	0.635413	-0.6016	0.13152	0.85925	0.076543	0.20666
PE(P-18:0/18:1)	-0.647938	0.03849	0.551425	-0.552	0.16151	0.75231	0.078184	0.20935
PE(16:0/22:4)	-0.668255	-0.11679	0.52214	-0.48453	0.39492	0.81694	0.084704	0.22495
PC(18:1/22:5)	-0.677832	0.179305	0.782898	-0.77973	-0.00181	0.58025	0.08713	0.22951
LPC(20:2)	-0.640498	-0.013355	0.601065	-0.41401	0.25499	0.6751	0.10493	0.27416
FFA(20:4)	-0.649203	-0.0418	0.493887	-0.45811	-0.08428	0.47113	0.10733	0.2782
FFA(20:0)	-0.52266	0.039665	0.473932	-0.72212	-0.23735	0.40119	0.10938	0.28125
SM(d18:0/14:0)	-0.55041	0.12418	0.73545	-0.68095	-0.0952	0.44819	0.11701	0.29388
PC(18:1/22:6)	-0.570873	0.08483	0.70808	-0.82576	-0.12322	0.5881	0.117	0.29388
PE(18:0/22:4)	-0.563335	-0.03792	0.680632	-0.42515	0.1745	0.76571	0.11677	0.29388
DAG(18:1/18:2)	-0.710568	0.12718	0.61919	-0.56707	0.24641	0.98078	0.11957	0.29643
AC10:1	-0.81033	-0.04783	0.696475	-0.59987	0.20495	0.79689	0.11985	0.29643
SM(d18:1/22:0)	-0.884683	0.05775	0.712363	-0.51768	0.17492	0.81227	0.12382	0.30353
PE(18:2/16:1)	-0.588075	0.135525	0.763962	-0.76657	-0.14109	0.54817	0.1246	0.30353
PC(16:0/22:5)	-0.67634	0.04763	0.761023	-0.55723	-0.16121	0.42039	0.13402	0.32193
PC(18:0/22:5)	-0.479965	0.063745	0.601043	-0.7106	-0.15574	0.55449	0.13712	0.32193
TAG52:4	-0.770132	0.024915	0.721695	-0.36129	0.18429	0.6938	0.1351	0.32193
DAG(16:1/18:2)	-0.510073	0.180875	0.742335	-0.79679	-0.04523	0.53344	0.13573	0.32193
PE(18:2/20:1)	-0.5344	0.050235	0.73488	-0.67517	-0.00086	0.61523	0.137	0.32193
DAG(16:0/18:2)	-0.674283	0.12585	0.649757	-0.66482	0.1652	0.959	0.14101	0.32532
PE(18:1/20:1)	-0.400797	0.11384	0.651335	-0.56971	-0.01828	0.51485	0.14158	0.32532
PE(P-16:0/16:1)	-0.63453	-0.0824	0.510933	-0.43044	0.01285	0.60186	0.14055	0.32532
LPC(16:1)	-0.669538	-0.07947	0.503075	-0.48809	0.1363	0.71062	0.14722	0.33147
PE(P-16:0/20:1)	-0.480725	0.09176	0.62048	-0.69848	-0.0122	0.54692	0.14732	0.33147
PE(P-18:1/18:3)	-0.568447	0.022425	0.651473	-0.45516	0.1348	0.65012	0.14681	0.33147
TAG52:7	-0.604463	0.06232	0.720612	-0.72686	0.02091	0.46789	0.15055	0.33641
SM (d18:0/24:0)	-0.624378	0.025775	0.709535	-0.88718	-0.15463	0.49647	0.1521	0.33754
PE(P-18:0/20:3)	-0.600073	-0.028285	0.62049	-0.53435	0.19175	0.771	0.15442	0.34036
DAG(18:1/18:1)	-0.592175	0.02625	0.5984	-0.77771	0.00156	0.96004	0.15605	0.34162
AC14:1	-0.73031	-0.04926	0.626295	-0.58323	0.17132	0.77155	0.16695	0.36062
AC16:0	-0.567878	0.000365	0.597615	-0.35307	0.14595	0.54672	0.16644	0.36062
TAG46:1	-0.711462	0.07539	0.77523	-0.76209	-0.0839	0.64174	0.17217	0.367
AC16:0-OH	-0.587785	0.02875	0.534245	-0.42052	0.15344	0.51896	0.17207	0.367
TAG46:2	-0.751665	0.046785	0.726167	-0.82821	-0.14991	0.60802	0.17749	0.37051
TAG56:5	-0.554867	0.09012	0.70101	-0.60587	-0.04141	0.65837	0.17914	0.37051
DAG(18:2/22:4)	-0.563932	0.108885	0.664793	-0.75731	-0.07451	0.70033	0.17976	0.37051
CE(18:3)	-0.617135	0.113695	0.73527	-0.74765	-0.06881	0.62339	0.17782	0.37051
CE(20:4)	-0.556248	0.08668	0.864032	-0.7879	-0.01523	0.64982	0.18096	0.37051
PE(18:0/18:2)	-0.790405	0.045525	0.67501	-0.57566	0.20817	0.82408	0.18117	0.37051
PE(P-18:1/20:2)	-0.663415	-0.059875	0.589375	-0.43718	0.26157	0.73606	0.18183	0.37051
PE(O-16:0/20:4)	-0.53207	0.05322	0.659072	-0.77066	-0.10023	0.57871	0.18326	0.3711
TAG54:4	-0.572858	0.05143	0.74285	-0.80953	-0.00616	0.54735	0.19219	0.38676
TAG46:0	-0.795312	0.08336	0.7666	-0.75939	-0.02386	0.63221	0.1935	0.387
PC(18:1/20:1)	-0.463093	0.11131	0.700585	-0.61431	0.08797	0.6456	0.19813	0.39142
PC(18:1/20:2)	-0.59131	-0.06794	0.657015	-0.48412	0.10999	0.79237	0.19785	0.39142
PE(18:1/18:2)	-0.60478	0.14276	0.794872	-0.81066	-0.12143	0.75282	0.20047	0.39365
SM(18:1/20:1)	-0.751232	-0.000325	0.62571	-0.42188	0.10795	0.7408	0.20705	0.4017
PC(18:1/20:3)	-0.775038	-0.068515	0.74267	-0.49022	0.2324	0.77068	0.20607	0.4017
PE(P-16:0/22:5)	-0.618888	0.05207	0.752595	-0.61944	-0.00732	0.53396	0.20939	0.40382
PE(O-18:0/18:2)	-0.741742	-0.100485	0.625652	-0.42831	0.04909	0.62922	0.21921	0.42027
PE(16:0/18:2)	-0.597435	0.027055	0.570392	-0.66669	0.1534	0.89988	0.22086	0.42093
PC(14:0/14:0)	-0.553848	0.126795	0.70574	-0.79063	0.01375	0.62939	0.22623	0.42865
PC(18:0/20:1)	-0.520953	0.01356	0.632165	-0.60719	-0.05378	0.53303	0.22964	0.43258
PE(P-18:1/16:1)	-0.63586	0.030685	0.546808	-0.51181	0.0512	0.68868	0.23735	0.44451
PC(16:0/18:2)	-0.66132	0.150005	0.743908	-0.33745	0.32276	0.77042	0.24519	0.45657
PE(P-18:0/20:1)	-0.553375	0.00459	0.590985	-0.37505	0.1838	0.68513	0.24942	0.45956
AC2:0	-0.706958	-0.083	0.57681	-0.55634	0.23363	0.84495	0.24964	0.45956
TAG48:4	-0.681775	0.03038	0.72366	-0.78447	-0.01541	0.4771	0.25453	0.46592
PC(14:0/18:3)	-0.53114	0.14557	0.65171	-0.60434	-0.028	0.55089	0.26583	0.47982
PE(O-18:0/20:2)	-0.723908	-0.072015	0.633167	-0.54323	0.0567	0.78461	0.26657	0.47982
PE(P-18:1/16:0)	-0.742115	-0.10097	0.637513	-0.82759	-0.29559	0.58764	0.26621	0.47982
TAG52:2	-0.65122	0.02758	0.702303	-0.48789	0.17116	0.70947	0.27354	0.48964
SM(d18:1/16:0)	-0.62578	-0.02585	0.728943	-0.83323	-0.23558	0.51007	0.27881	0.49095
CE(18:2)	-0.72958	-0.110475	0.55173	-0.44601	0.1902	0.72238	0.277	0.49095
PE(18:0/20:3)	-0.61322	-0.273935	0.162243	-0.67418	-0.39579	-0.0533	0.27766	0.49095
TAG50:3	-0.6722	-0.01152	0.626032	-0.54694	-0.06214	0.81106	0.28166	0.49329
PE(16:0/20:2)	-0.604683	0.03569	0.72537	-0.71669	-0.04568	0.49987	0.28333	0.49355
PE(P-14:0/18:1)	-0.566488	0.14012	0.675273	-0.69073	-0.00538	0.61073	0.28948	0.49931
PE(P-18:2/22:6)	-0.566465	0.03922	0.722603	-0.65103	0.02386	0.60717	0.28972	0.49931
AC18:0	-0.532655	-0.047315	0.571518	-0.53026	0.07288	0.71131	0.30549	0.52369
TAG54:5	-0.694745	-0.04952	0.69875	-0.69375	-0.03991	0.46948	0.31505	0.53165
PE(16:0/16:0)	-0.567735	0.02786	0.66325	-0.68814	-0.11742	0.52535	0.31467	0.53165
PE(16:0/16:1)	-0.567735	0.02786	0.66325	-0.68814	-0.11742	0.52535	0.31467	0.53165
PE(18:1/20:4)	-0.422365	0.173385	0.667828	-0.76672	0.06504	0.70461	0.32183	0.54028
PC(18:1/18:2)	-0.683013	0.095205	0.845727	-0.98423	0.01649	0.77908	0.32703	0.54338
PE(O-16:0/18:3)	-0.623847	0.04811	0.611603	-0.59766	0.17634	0.74292	0.32609	0.54338
CE(16:0)	-0.67971	0.078545	0.604437	-0.68787	0.05656	0.61841	0.33232	0.54934
PE(P-18:1/22:5)	-0.680207	-0.00556	0.646683	-0.516	0.22114	0.82234	0.34342	0.56481
LPC(18:0)	-0.721202	-0.034965	0.622798	-0.69815	0.08266	0.67599	0.35242	0.57668
LPC(14:0)	-0.573577	0.080505	0.65893	-0.82767	0.1011	0.62638	0.35842	0.58355
LPC(18:3)	-0.698035	-0.06429	0.636745	-0.60064	0.18073	0.6194	0.36493	0.59119
AC20:1	-0.59858	0.0326	0.579732	-0.46411	-0.03441	0.5331	0.3715	0.59883
TAG52:1	-0.664435	0.038975	0.644625	-0.6853	0.08541	0.68183	0.37632	0.6036
LPC(20:4)	-0.688418	0.06637	0.627323	-0.49196	0.06255	0.74703	0.38015	0.60674
PC(14:0/20:3)	-0.548665	0.084325	0.735193	-0.62917	0.01258	0.62652	0.3844	0.61052
PC(16:0/16:0)	-0.567508	0.00316	0.813345	-0.64003	-0.10889	0.49941	0.38688	0.61147
PE(O-16:0/18:2)	-0.60459	0.155465	0.749478	-0.78062	0.04876	0.74089	0.39291	0.61797
LPC(16:0)	-0.73799	0.103285	0.711725	-0.81423	-0.17078	0.66538	0.39645	0.62052
TAG56:2	-0.657107	-0.04572	0.695418	-0.80757	-0.05957	0.53599	0.40374	0.62546
PE(P-16:0/18:3)	-0.601877	0.01712	0.617513	-0.73669	0.11026	0.59204	0.40539	0.62546
PE(P-18:0/18:3)	-0.554268	-0.099375	0.480872	-0.48672	-0.09799	0.47491	0.40336	0.62546
PE(O-18:0/18:1)	-0.584692	-0.069185	0.62688	-0.69206	-0.14364	0.48174	0.41337	0.63175
AC12:0-OH	-0.688348	0.110885	0.65366	-0.5621	-0.0432	0.6409	0.41279	0.63175
AC14:0	-0.669375	-0.04779	0.5635	-0.53774	-0.02756	0.67058	0.41566	0.63227
PE(18:1/22:4)	-0.606385	-0.01186	0.685438	-0.48664	0.17056	0.83653	0.41863	0.63382
PE(O-16:0/20:3)	-0.498337	0.097805	0.75451	-0.51686	0.06791	0.53543	0.42331	0.63421
PE(O-16:0/22:5)	-0.54058	0.132335	0.620302	-0.52858	0.10273	0.7021	0.42262	0.63421
PE(P-16:0/20:4)	-0.552385	-0.04586	0.634413	-0.62067	-0.1276	0.36651	0.42476	0.63421
SM(d18:1/22:1)	-0.700547	-0.01289	0.659452	-0.56892	0.17275	0.67141	0.43269	0.64014
PC(18:0/16:1)	-0.725345	-0.19458	0.548	-0.68928	-0.14937	0.71868	0.4312	0.64014
PE(P-16:0/18:1)	-0.693725	-0.223185	0.553362	-0.75233	-0.29286	0.2798	0.43512	0.64081
TAG54:3	-0.629448	0.008495	0.685105	-0.64005	-0.06378	0.62674	0.43783	0.64189
TAG50:1	-0.642615	0.073995	0.67196	-0.58955	0.09247	0.78759	0.44569	0.64756
PE(18:1/18:3)	-0.605677	0.078025	0.726328	-0.67238	0.19532	0.61192	0.44404	0.64756
DAG(16:1/18:1)	-0.694995	-0.03502	0.743437	-0.67006	-0.08053	0.64683	0.44898	0.64942
PC(16:0/18:0)	-0.592005	0.06535	0.74141	-0.66963	0.04878	0.54462	0.4518	0.65059
LPC(18:2)	-0.534135	-0.000525	0.616378	-0.7624	0.02138	0.6951	0.45797	0.65656
CE(18:0)	-0.578588	-0.02291	0.600485	-0.56567	0.02181	0.58422	0.46531	0.66415
SM(d18:1/18:1(9Z))	-0.695527	-0.02077	0.64581	-0.70352	0.03099	0.62592	0.48815	0.68834
PC(18:0/18:3)	-0.73496	-0.081225	0.487545	-0.64618	-0.08518	0.61457	0.49076	0.68834
TAG48:2	-0.628818	-0.002495	0.631162	-0.6336	0.05759	0.76381	0.48528	0.68834
PE(16:0/18:1)	-0.59457	0.07251	0.677493	-0.71651	-0.08482	0.64206	0.48911	0.68834
PC(18:1/18:1)	-0.71656	-0.07156	0.57486	-0.669	0.07502	0.64055	0.49773	0.69511
PE(P-18:1/18:1)	-0.742067	-0.08695	0.625803	-0.56144	0.0333	0.61714	0.49988	0.69511
PC(18:0/18:2)	-0.55228	0.122275	0.603047	-0.46389	0.1796	0.78942	0.5041	0.69798
FFA(24:0)	-0.579102	-0.0843	0.503023	-0.6778	-0.14663	0.49387	0.5144	0.70545
PC(16:0/20:2)	-0.717315	-0.14973	0.685447	-0.58663	-0.18638	0.73747	0.51939	0.70545
PC(18:0/18:1)	-0.665543	0.106265	0.72727	-0.77214	-0.05836	0.63445	0.52256	0.70545
PC(18:0/20:3)	-0.6941	-0.23395	0.492503	-0.73418	-0.23644	0.1826	0.52033	0.70545
PE(18:1/20:3)	-0.41875	0.147905	0.622382	-0.65349	0.21422	0.71376	0.51875	0.70545
PE(P-16:0/18:0)	-0.651317	-0.099125	0.452417	-0.6194	0.01473	0.70179	0.52083	0.70545
PE(18:2/18:2)	-0.506615	0.07497	0.65722	-0.52155	0.05483	0.69297	0.52734	0.70895
TAG48:3	-0.653438	0.025825	0.663177	-0.70598	-0.0099	0.66302	0.53342	0.71131
DAG(16:1/20:0)	-0.76137	-0.15921	0.741315	-0.81328	-0.22676	0.82655	0.53348	0.71131
PC(16:0/20:3)	-0.60568	-0.31697	0.161747	-0.59213	-0.37821	-0.02345	0.5377	0.714
LPC(18:1)	-0.584875	-0.02075	0.627483	-0.60901	-0.08371	0.69025	0.54777	0.72439
PE(O-16:0/18:1)	-0.544018	0.01324	0.638405	-0.61679	0.00624	0.48121	0.55579	0.73183
PE(P-18:2/18:2)	-0.618372	0.06612	0.61891	-0.65718	0.17068	0.75609	0.55791	0.73183
AC18:2-OH	-0.646282	-0.037345	0.629405	-0.49411	0.02411	0.61808	0.56781	0.74181
DAG(20:0/20:0)	-0.596065	-0.062685	0.5622	-0.6877	-0.14085	0.50915	0.57215	0.74449
TAG56:4	-0.64978	0.06333	0.700603	-0.7516	0.09906	0.66856	0.58835	0.7625
TAG56:3	-0.570263	-0.017055	0.540705	-0.63948	-0.09468	0.60253	0.59329	0.76584
PC(18:0/20:4)	-0.658763	-0.001385	0.654205	-0.81327	-0.06219	0.60309	0.61875	0.79554
LPC(22:5)	-0.556468	0.04526	0.5717	-0.4079	0.09566	0.52938	0.625	0.79906
PE(18:0/18:3)	-0.701163	0.012005	0.660532	-0.71932	-0.10302	0.64654	0.62642	0.79906
PE(O-18:0/20:1)	-0.598988	0.044205	0.568462	-0.42236	0.14029	0.70975	0.63431	0.80594
SM(d18:1/18:0)	-0.64362	0.019215	0.774393	-0.58204	-0.2559	0.59576	0.63858	0.80778
PE(P-16:1/18:1)	-0.520907	-0.001525	0.543795	-0.63193	0.05228	0.70085	0.64074	0.80778
PE(P-16:0/20:3)	-0.484032	0.049715	0.628093	-0.55736	-0.00728	0.38491	0.64966	0.81586
PC(14:0/18:2)	-0.60771	0.133935	0.670532	-0.67266	0.04354	0.61565	0.66676	0.82462
PC(16:0/14:0)	-0.674315	0.09415	0.714008	-0.81475	-0.05244	0.77481	0.67061	0.82462
PC(16:0/18:3)	-0.658135	-0.02622	0.616722	-0.81001	-0.03325	0.90358	0.66463	0.82462
PC(18:2/18:2)	-0.664735	-0.040615	0.701555	-0.57278	0.04171	0.68454	0.67192	0.82462
PE(P-18:1/20:4)	-0.599677	0.081895	0.642473	-0.49005	0.18221	0.62121	0.66795	0.82462
AC14:0-OH	-0.648463	-0.03138	0.597357	-0.63779	0.03605	0.77728	0.67121	0.82462
PC(14:0/20:4)	-0.506722	0.140065	0.664315	-0.69174	0.18522	0.62466	0.68331	0.83437
AC8:1	-0.539355	0.072195	0.658933	-0.51932	0.12368	0.66838	0.68501	0.83437
PC(18:1/20:4)	-0.682987	-0.007985	0.725788	-0.56993	0.09961	0.69943	0.68837	0.83532
TAG52:0	-0.76746	-0.030395	0.658512	-0.70954	0.09774	0.68222	0.6965	0.83891
TAG58:2	-0.587997	-0.134375	0.516587	-0.73388	-0.08704	0.34736	0.69391	0.83891
PE(18:1/22:5)	-0.460498	0.113435	0.66442	-0.5114	0.24433	0.63851	0.7048	0.84568
AC20:0	-0.540785	0.027325	0.658428	-0.73133	-0.02892	0.58473	0.70734	0.84568
SM(d18:1/20:0)	-0.630297	0.045805	0.628982	-0.86696	0.04501	0.76745	0.72699	0.85445
PC(16:0/20:4)	-0.704847	0.03541	0.69602	-0.68597	-0.06619	0.69527	0.72786	0.85445
TAG58:3	-0.624425	-0.16867	0.48453	-0.67557	-0.06143	0.34746	0.72381	0.85445
PE(18:0/20:2)	-0.68221	-0.06848	0.713152	-0.78941	-0.18376	0.72579	0.71831	0.85445
AC6:0	-0.541875	0.003595	0.522828	-0.32192	0.18517	0.67103	0.72336	0.85445
DAG(16:1/18:0)	-0.575873	-0.008785	0.629533	-0.4459	0.06206	0.66919	0.73475	0.85941
PE(P-18:0/16:0)	-0.637118	0.00264	0.527443	-0.8356	-0.0766	0.70678	0.75647	0.87912
PE(P-18:0/20:4)	-0.64461	0.13023	0.690828	-0.5648	0.04594	0.67908	0.75702	0.87912
PE(O-18:0/16:0)	-0.734213	-0.112785	0.516938	-0.62687	-0.16142	0.66453	0.76127	0.88089
PC(18:2/20:4)	-0.68543	0.021185	0.79037	-0.52993	0.03583	0.63136	0.77313	0.89144
AC10:0	-0.676867	0.063765	0.671165	-0.63183	0.11929	0.61366	0.7859	0.90295
PE(P-18:0/20:2)	-0.584048	-0.025545	0.553635	-0.62226	0.09368	0.49836	0.79181	0.90333
PE(P-18:1/20:1)	-0.643558	0.06188	0.651998	-0.66055	0.09639	0.64085	0.79131	0.90333
TAG56:1	-0.61982	-0.067155	0.69926	-0.72331	-0.14179	0.53887	0.796	0.90417
PE(18:2/20:4)	-0.544558	0.12767	0.656852	-0.49338	0.12606	0.65961	0.79812	0.90417
TAG48:0	-0.77153	-0.1749	0.721762	-0.66411	-0.05957	0.72674	0.80878	0.90673
TAG52:5	-0.72974	-0.07212	0.674482	-0.66281	-0.01459	0.64871	0.80605	0.90673
TAG56:10	-0.56943	0.108245	0.760265	-0.77274	0.03713	0.70933	0.80795	0.90673
PE(16:0/20:3)	-0.483245	0.157145	0.673347	-0.59898	0.1178	0.71572	0.81294	0.90825
PE(P-16:0/20:2)	-0.536895	0.02051	0.607765	-0.46066	0.15728	0.62423	0.81841	0.9087
AC12:0	-0.669013	0.131625	0.756505	-0.59361	0.06944	0.74116	0.81895	0.9087
TAG54:0	-0.650177	-0.08508	0.687442	-0.68255	-0.05971	0.61377	0.82977	0.91756
PE(P-18:1/18:0)	-0.53834	-0.03539	0.362017	-0.51862	-0.10927	0.45948	0.84691	0.93333
TAG50:0	-0.78265	-0.095065	0.680595	-0.66715	0.01278	0.64326	0.85231	0.93609
PC(14:0/18:1)	-0.684435	0.05605	0.735835	-0.63269	-0.01127	0.74106	0.86751	0.94277
PE(18:1/20:2)	-0.627015	-0.004615	0.708735	-0.61784	0.06168	0.59059	0.86969	0.94277
PE(P-16:0/18:2)	-0.578395	0.08672	0.603938	-0.6863	0.0598	0.76882	0.8622	0.94277
PE(P-18:2/20:4)	-0.63498	0.030455	0.677377	-0.59863	0.07763	0.80298	0.87003	0.94277
FFA(16:0)	-0.60346	-0.138595	0.440883	-0.65822	-0.15236	0.44122	0.8791	0.94314
PE(16:0/20:4)	-0.53463	0.0488	0.65762	-0.88431	0.0626	0.83002	0.87792	0.94314
PE(18:0/20:4)	-0.633827	0.043775	0.670392	-0.69504	-0.01361	0.60292	0.87775	0.94314
CE(16:1)	-0.777887	-0.112465	0.601387	-0.65895	-0.02328	0.74945	0.89216	0.95049
CE(20:3)	-0.564373	0.136955	0.688187	-0.54359	0.10674	0.67866	0.89082	0.95049
PE(P-18:1/18:2)	-0.69826	0.04223	0.70319	-0.71886	0.18957	0.80829	0.89475	0.95049
TAG48:1	-0.710178	0.08457	0.713835	-0.73643	0.09898	0.79926	0.91716	0.95244
TAG50:6	-0.723245	-0.023095	0.73492	-0.57161	0.14291	0.71985	0.91378	0.95244
TAG54:2	-0.543403	0.0036	0.624583	-0.64195	0.0183	0.59544	0.91469	0.95244
PE(16:0/18:3)	-0.51417	0.091315	0.59809	-0.49376	0.12417	0.78139	0.90087	0.95244
PE(16:0/22:5)	-0.590302	-0.0192	0.65899	-0.65744	0.06473	0.78992	0.90693	0.95244
PE(18:0/18:1)	-0.594348	0.05435	0.661965	-0.75807	-0.08953	0.63064	0.90976	0.95244
PE(O-18:0/16:1)	-0.659705	-0.03474	0.648005	-0.72025	0.12704	0.7227	0.91516	0.95244
PC(18:2/18:3)	-0.59719	0.047155	0.65038	-0.61679	0.13465	0.66135	0.92367	0.95452
TAG52:8	-0.63742	0.055515	0.655215	-0.56741	0.07475	0.60275	0.92506	0.95452
PC(18:0/20:2)	-0.421422	0.261115	0.633798	-0.63295	0.20004	0.75886	0.92983	0.95639
PC(18:2/20:2)	-0.589322	-0.16595	0.480712	-0.60633	-0.10991	0.40606	0.94388	0.96778
PC(18:2/16:1)	-0.707655	-0.068955	0.749912	-0.64892	-0.04641	0.60608	0.9524	0.972
AC8:0	-0.650972	0.03799	0.652303	-0.63565	0.2079	0.6428	0.954	0.972
PC(16:1/18:2)	-0.726855	-0.0768	0.701268	-0.66145	0.0078	0.5287	0.96017	0.97217
CE(20:0)	-0.619138	-0.10238	0.478985	-0.50023	0.02372	0.48679	0.95872	0.97217
TAG58:5	-0.600035	-0.00878	0.543717	-0.5048	0.13693	0.71574	0.96598	0.97501
DAG(18:0/22:6)	-0.721407	-0.255755	0.600275	-0.59032	-0.1918	0.47492	0.97172	0.97775
PC(16:0/18:1)	-0.742865	-0.059025	0.658035	-0.74362	-0.18743	0.79679	0.97747	0.98049
SM(d18:0/20:0)	-0.653367	-0.0826	0.63761	-0.72609	-0.14859	0.54871	0.98917	0.98917

## Sheet: Training set stratified
Median and interquartile range of plasma concentration of the measured lipids (µmol/L) in slow and rapid decliners of eGFR in the training subset:
Lipids		eGFR>90 mL/min, Non-albuminuric, Slow-Decliners, n=118			eGFR>90 mL/min, Non-albuminuric, Rapid-Decliners, n=57			eGFR>90 mL/min, Albuminuric, Slow-Decliners, n=21			eGFR>90 mL/min, Albuminuric, Rapid-Decliners, n=26			eGFR>90 mL/min, All Slow-Decliners, n=139			eGFR>90 mL/min, All Rapid-Decliners, n=83			eGFR 60-90 mL/min, Non-albuminuric, Slow-Decliners, n=95			eGFR 60-90 mL/min, Non-albuminuric, Rapid-Decliners, n=6			eGFR 60-90 mL/min, Albuminuric, Slow-Decliners, n=36			eGFR 60-90 mL/min, Albuminuric, Rapid-Decliners, n=23			eGFR 60-90 mL/min, All Slow-Decliners, n=131			eGFR 60-90 mL/min, All Rapid-Decliners, n=29			eGFR <60 mL/min, Non-albuminuric, Slow-Decliners, n=8			eGFR <60 mL/min, Albuminuric, Slow-Decliners, n=6			eGFR <60 mL/min, Albuminuric, Rapid-Decliners, n=11			eGFR <60 mL/min, All Slow-Decliners, n=14
		Percentiles			Percentiles			Percentiles			Percentiles			Percentiles			Percentiles			Percentiles			Percentiles			Percentiles			Percentiles			Percentiles			Percentiles			Percentiles			Percentiles			Percentiles			Percentiles
	25	50	75	25	50	75	25	50	75	25	50	75	25	50	75	25	50	75	25	50	75	25	50	75	25	50	75	25	50	75	25	50	75	25	50	75	25	50	75	25	50	75	25	50	75	25	50	75	25
FFA(14:0) (µmol/L)	21.7246	24.6538	29.7434	20.046	23.8719	27.0639	22.2426	24.543	25.9245	22.239	24.0635	26.4877	21.8603	24.6453	29.349	20.9843	23.905	26.8201	22.2424	25.1632	29.9242	21.048	23.598	29.7314	21.9249	26.132	31.3199	22.7886	26.8387	33.3182	22.2424	25.5144	30.2579	22.7492	24.4073	32.7843	21.7245	28.97	35.161	24.1217	25.946	30.1752	21.4104	28.3689	42.4956	22.4321	26.9091	34.557	21.4104
FFA(16:0) (µmol/L)	358.852	424.549	540.066	308.418	394.325	542.039	332.655	391.33	446.731	364.744	437.839	602.303	356.867	411.07	508.901	339.258	421.749	544.293	359.1	408.514	539.785	292.548	418.531	518.277	322.424	429.505	542.048	369.964	442.104	710.771	356.372	410.785	539.785	359.857	442.104	591.857	337.121	456.514	925.789	468.123	522.712	625.863	368.94	673.83	868.415	372.277	507.21	752.854	368.94
FFA(18:0) (µmol/L)	1280.06	1546.45	1751.96	1215.42	1337.42	1662.63	1153.06	1234.95	1558.24	1213.96	1422.19	1656	1255.67	1482.94	1716.48	1215.42	1356.09	1656.87	1315.36	1484.99	1739.24	1236.1	1449.05	1880.19	1218.87	1498.96	1629.81	1308.09	1467.6	1729.62	1290.97	1489.12	1722.44	1331.15	1467.6	1778.3	1165.9	1522.48	1747.81	1345.25	1694.66	1844.14	1354.21	1764.74	2002.02	1254.86	1658.76	1771.18	1354.21
FFA(18:1) (µmol/L)	176.204	348.32	568.404	257.023	432.705	651.091	239.692	392.144	556.649	358.517	508.838	783.872	182.183	356.867	566.229	285.677	446.415	681.817	166.253	274.8	565.444	171.986	213.452	305.906	178.65	400.107	540.733	272.147	431.208	645.933	169.042	300.921	542.786	242.634	370.991	589.936	407.494	495.24	1098.01	342.341	541.997	801.262	341.145	785.377	1409.77	373.904	513.591	801.262	341.145
FFA(18:2) (µmol/L)	58.4143	118.789	213.523	119.202	162.832	282.591	75.0733	109.991	228.409	103.456	205.781	276.14	63.922	118.213	213.078	118.459	162.945	275.373	55.8018	92.6835	191.505	42.4572	65.6669	92.2833	65.4635	115.198	195.323	76.6514	118.459	177.816	55.8405	97.6292	191.505	69.9023	110.144	171.172	131.778	192.781	441.65	137.662	185.855	286.73	86.9576	163.851	357.609	135.717	185.855	286.73	86.9576
FFA(20:0) (µmol/L)	13.417	15.3295	18.8697	11.6418	14.1158	18.0166	12.2646	14.5731	18.8467	11.963	13.9918	20.1189	13.3359	15.2977	18.8336	11.6579	14.1158	19.6743	12.7395	14.7561	18.4716	13.722	15.9223	18.8746	13.4382	14.8848	18.7263	13.8062	16.3956	22.0888	12.9892	14.7868	18.6001	13.8157	16.3956	20.7366	11.1603	13.5948	18.2969	16.4022	19.1566	23.2401	11.9029	18.3695	27.3836	12.5315	16.4082	19.9773	11.9029
FFA(20:1) (µmol/L)	3.07483	5.06038	6.99582	3.63577	5.37119	8.57281	4.55601	6.33454	8.52431	4.67066	7.63753	9.24563	3.23158	5.12745	7.33217	3.65594	5.82089	9.02071	3.41347	4.80069	7.23123	3.65052	4.15189	5.73603	3.30189	6.08193	8.80119	4.9631	7.18626	10.6608	3.41347	4.9425	7.76637	4.51538	6.98007	9.92939	5.07732	8.20686	11.4372	5.20545	7.60696	9.77848	6.95592	13.41	20.6954	5.20545	7.92918	10.1807	6.95592
FFA(20:2) (µmol/L)	2.02046	3.82184	5.66062	3.25989	4.82738	6.73533	2.38986	3.59562	6.71025	3.9744	5.76343	7.26853	2.058	3.798	5.83706	3.29948	5.16311	6.77509	1.9322	3.10209	6.12725	1.90313	2.53678	3.24515	1.91476	3.67953	6.00441	2.94087	4.37184	5.52219	1.9322	3.42295	6.07229	2.66426	4.12742	5.28411	4.51461	5.07166	9.09869	3.55129	6.6176	8.52623	4.26114	6.9946	12.153	4.35499	5.787	8.52623	4.26114
FFA(20:4) (µmol/L)	3.45155	4.49635	6.7388	3.38415	4.95966	6.72833	3.65089	4.56382	6.6384	3.6489	5.61677	8.8207	3.48037	4.51661	6.71432	3.47796	5.14882	6.75165	3.41584	4.43902	6.40963	3.15361	4.19539	4.90007	3.77394	4.67752	7.03729	3.90478	4.75762	6.05968	3.52895	4.62752	6.54431	3.88726	4.4053	5.90284	4.12803	6.33163	8.15871	3.07071	5.26039	7.01015	4.09607	5.78469	9.16567	3.70707	5.77879	7.49053	4.09607
FFA(24:0) (µmol/L)	7.90672	10.4488	15.3881	8.25535	10.6313	15.2095	8.07538	10.8923	20.4676	7.16264	9.99335	24.5421	7.95709	10.5067	15.4683	8.10741	10.6313	16.6822	7.57497	10.4053	13.9311	7.9049	10.8606	17.0452	8.86869	12.3	19.6754	7.50182	11.6176	25.0587	7.80956	10.5286	16.407	7.80181	11.4022	23.7308	7.28516	10.2392	13.8614	10.3637	14.838	25.9799	8.64725	11.7798	25.7275	7.43307	12.2108	14.8304	8.64725
FFA(24:1) (µmol/L)	33.7834	38.2461	44.3082	30.8189	34.1364	45.2938	30.8639	35.8584	42.4014	29.7178	37.8949	45.5772	33.7834	38.2196	44.1775	30.5318	35.6849	45.3252	33.9948	37.6151	42.4956	33.1241	37.4472	46.7745	31.8119	37.8899	47.0022	35.2668	40.092	46.5026	32.7913	37.8243	42.8802	34.892	37.8243	46.326	27.5163	32.6295	40.3672	37.5529	43.8491	48.5408	35.5861	45.8306	52.7186	30.8857	37.0712	45.3658	35.5861
FFA(24:2) (µmol/L)	4.92292	9.02536	15.0662	7.69406	11.7228	16.7057	7.06296	10.4341	14.4067	8.52149	13.7831	20.4889	4.95279	9.56815	14.9103	7.71273	12.486	18.4845	4.68887	7.64884	13.6918	5.12207	5.88712	7.61956	5.0485	10.0575	14.8672	7.61182	11.3156	17.2108	4.69212	7.92956	14.106	6.33416	9.30006	14.7922	10.2027	14.0329	19.1346	10.5111	15.7818	21.3267	7.7395	19.2961	32.2056	10.4786	14.4477	20.5774	7.7395
FFA(24:3) (µmol/L)	1.39017	2.54521	4.57745	2.80966	3.80591	5.59636	1.81954	2.42711	4.26528	2.25689	4.00263	6.14443	1.40663	2.52493	4.4792	2.53018	3.80591	5.95145	1.23306	1.97006	3.96203	1.0633	1.34103	2.12499	1.44852	2.52935	4.3142	1.67625	2.86839	4.37791	1.26597	2.09687	4.15037	1.56166	2.35584	4.14577	2.85737	3.97441	7.83077	3.19387	4.40776	6.09081	1.48683	3.91562	7.70738	3.10905	4.02178	6.09081	1.48683
LPC(14:0) (µmol/L)	0.24578	0.329861	0.425859	0.210004	0.283011	0.397321	0.228313	0.297081	0.512742	0.203453	0.290836	0.564454	0.243996	0.317082	0.433748	0.207607	0.283011	0.443169	0.240637	0.330089	0.447801	0.25283	0.467142	0.577667	0.295685	0.395142	0.538291	0.310557	0.383402	0.449355	0.25225	0.340784	0.494461	0.299157	0.391458	0.491884	0.178132	0.220675	0.358602	0.244885	0.316735	0.341846	0.251901	0.298319	0.363475	0.206036	0.246454	0.341846	0.251901
LPC(16:0) (µmol/L)	85.7568	102.284	125.403	73.3152	87.2406	105.757	89.7334	108.905	145.053	87.7866	112.819	144.53	86.2784	102.461	126.67	77.5432	91.1979	114.32	90.9454	103.963	119.837	108.68	114.902	137.71	88.9658	114.638	126.117	108.078	120.754	146.112	89.88	105.195	121.594	109.099	119.754	145.96	72.7529	87.4576	98.2055	62.8867	83.0071	87.7209	84.5614	112.902	138.326	71.8517	85.3309	93.4883	84.5614
LPC(16:1) (µmol/L)	1.57127	1.9419	2.49418	1.55609	1.94521	2.50538	1.41916	1.74827	3.26825	1.69056	2.34137	3.21526	1.5368	1.88286	2.5543	1.60317	2.03909	2.59895	1.52301	1.93446	2.73953	1.85992	2.11558	2.96847	1.53982	2.00754	2.45705	1.5188	2.47243	3.0566	1.53042	1.96691	2.61159	1.58581	2.22982	3.01172	1.37716	1.75691	1.87637	1.16044	1.63343	2.28566	1.59984	2.1037	2.19303	1.2598	1.75691	1.97056	1.59984
LPC(18:0) (µmol/L)	56.6587	66.7607	82.7353	49.8133	55.9446	67.2523	59.9301	71.0581	79.9729	55.7414	83.6941	95.1557	57.0806	67.2717	82.1352	50.1761	59.8769	74.8499	58.5634	67.7866	78.2993	59.1796	73.8215	84.1329	54.0242	68.5685	79.721	75.4751	81.851	96.6654	58.4013	68.0219	78.2993	74.5912	80	92.2504	49.1329	54.0798	60.9054	46.7025	54.4196	63.9218	63.8639	76.1055	102.603	48.2057	54.0798	61.6058	63.8639
LPC(18:1) (µmol/L)	34.6059	41.6853	51.0895	29.2519	36.8841	48.7027	31.5737	36.6802	57.7387	32.6548	42.7399	60.6797	34.3188	41.2959	51.6225	29.5878	39.2856	50.6654	33.6126	39.5314	47.866	32.2549	38.8577	57.4977	29.944	38.5458	46.8252	36.4016	45.7255	55.366	32.288	39.422	47.2397	34.81	43.6506	54.0915	33.8866	40.2317	43.2198	24.0683	30.3104	39.856	29.5058	39.4493	45.2526	25.4816	37.1557	41.9945	29.5058
LPC(18:2) (µmol/L)	31.2585	41.7282	52.8629	31.2315	36.9097	50.7017	32.4271	37.8948	48.5343	28.3081	38.3113	49.83	31.4705	40.8971	52.6342	30.0841	36.9097	50.3503	30.7801	38.2909	50.2805	29.8346	34.1179	61.0924	23.7225	33.1782	46.7487	27.9529	35.9751	49.3483	27.8369	35.5784	49.5539	29.0289	35.9751	51.3956	28.6821	34.6982	52.5516	24.9863	28.6354	33.7759	27.0945	31.4269	39.834	27.4011	29.5059	42.1983	27.0945
LPC(18:3) (µmol/L)	0.242788	0.324308	0.484881	0.249731	0.331006	0.472356	0.273112	0.424527	0.70467	0.263298	0.369587	0.483537	0.246204	0.330776	0.489686	0.251029	0.34173	0.474647	0.243152	0.328492	0.491386	0.315361	0.422561	0.782027	0.230357	0.311537	0.449646	0.299147	0.461348	0.618107	0.233894	0.31402	0.479608	0.303459	0.461348	0.617251	0.205559	0.27345	0.4006	0.200629	0.275032	0.362207	0.235358	0.317742	0.525196	0.211454	0.27345	0.345655	0.235358
LPC(20:0) (µmol/L)	0.448042	0.593342	0.70111	0.349171	0.453423	0.633086	0.455593	0.594986	0.755055	0.318103	0.560955	0.730371	0.449667	0.594986	0.704625	0.345541	0.486978	0.65471	0.416656	0.513675	0.671253	0.385918	0.413792	0.716493	0.406413	0.499831	0.594386	0.535118	0.578315	0.640348	0.416656	0.510127	0.661553	0.493093	0.575915	0.641905	0.330307	0.467317	0.584341	0.409123	0.49412	0.538299	0.470716	0.624134	0.713472	0.36201	0.481896	0.538299	0.470716
LPC(20:1) (µmol/L)	0.577014	0.784284	0.990205	0.445634	0.592517	0.796882	0.677955	0.990294	1.19117	0.498237	0.791632	1.35513	0.589649	0.802141	1.02238	0.471696	0.632847	0.883883	0.609175	0.787269	1.09576	0.528118	0.703318	1.06062	0.63725	0.769734	1.26199	0.758872	0.911888	0.992355	0.636366	0.782915	1.11568	0.68607	0.890649	0.980127	0.42965	0.733819	0.951391	0.500974	0.525044	0.745005	0.815597	1.11414	1.24827	0.500974	0.627184	0.8777	0.815597
LPC(20:2) (µmol/L)	0.48303	0.575517	0.739402	0.446313	0.594162	0.69134	0.455364	0.59954	0.810402	0.473612	0.661644	1.03518	0.480273	0.576314	0.756246	0.453737	0.596225	0.767335	0.44718	0.544471	0.751543	0.427976	0.536292	0.759574	0.459757	0.584159	0.747135	0.516174	0.690603	0.861503	0.451854	0.563672	0.748943	0.508541	0.659721	0.819775	0.384903	0.535928	0.605122	0.349951	0.461672	0.668894	0.431948	0.614689	0.882047	0.380889	0.523574	0.596171	0.431948
LPC(20:3) (µmol/L)	1.80436	2.40399	3.13764	1.75255	2.14344	2.72188	1.25415	1.83646	3.88955	1.99896	2.64413	3.56092	1.7374	2.39484	3.18861	1.77022	2.30047	3.13818	1.71229	2.23446	2.77392	1.63064	2.12052	3.59971	1.83551	2.09431	2.77737	2.17638	2.53139	3.79455	1.76287	2.2037	2.77392	2.0476	2.49135	3.72485	1.42305	1.86596	2.27804	1.48813	1.71064	2.35283	2.0222	2.49308	2.72627	1.48813	1.77443	2.28102	2.0222
LPC(20:4) (µmol/L)	1.88842	2.29649	2.91992	1.75799	2.25938	2.81862	1.76877	2.27037	3.28329	1.66205	2.17273	2.97472	1.88548	2.29092	2.96479	1.75556	2.23911	2.84204	1.67357	2.18393	2.84796	1.7343	2.22314	3.60607	1.49221	2.19163	2.84057	1.83265	2.40815	2.89774	1.59652	2.18393	2.84401	1.83519	2.38159	2.88773	1.65541	1.93255	2.41853	1.27231	1.49641	1.63924	1.53148	2.20676	2.60075	1.45323	1.65915	2.15191	1.53148
LPC(20:5) (µmol/L)	0.0287794	0.0470568	0.091422	0.0156567	0.0246876	0.0417806	0.0267612	0.0825795	0.163455	0.0228768	0.029869	0.0589411	0.0288143	0.0543313	0.0998515	0.0164579	0.0268102	0.0433726	0.0280458	0.0692006	0.147412	0.0691699	0.126305	0.179794	0.0420558	0.0746841	0.114921	0.0343613	0.0848423	0.178244	0.0316847	0.0696819	0.135929	0.0484783	0.0871067	0.175747	0.0209917	0.0242603	0.0304198	0.0091717	0.0166088	0.0300376	0.045058	0.0627139	0.11462	0.0102997	0.023043	0.0300376	0.045058
LPC(22:4) (µmol/L)	0.0860532	0.127975	0.194715	0.118416	0.179858	0.222632	0.0401356	0.142391	0.19619	0.124126	0.187111	0.398717	0.0823509	0.128419	0.194377	0.118826	0.184019	0.250334	0.0795457	0.123358	0.181738	0.053614	0.0961337	0.19163	0.0540069	0.0976746	0.193808	0.101316	0.118826	0.185428	0.0763054	0.118497	0.182875	0.0770608	0.116139	0.184979	0.0829334	0.124705	0.155548	0.0774973	0.0978134	0.161629	0.0553194	0.107763	0.149263	0.0838785	0.108679	0.156471	0.0553194
LPC(22:5) (µmol/L)	0.164816	0.221138	0.277331	0.127139	0.184019	0.245524	0.150302	0.230355	0.291585	0.157009	0.226724	0.361974	0.163111	0.22359	0.277186	0.135929	0.19915	0.266264	0.149781	0.213592	0.291775	0.173663	0.239299	0.378698	0.136451	0.203693	0.311208	0.214928	0.250161	0.317962	0.149781	0.205175	0.299562	0.2084	0.250161	0.319179	0.124865	0.159112	0.230297	0.121794	0.129635	0.157929	0.145685	0.261871	0.284584	0.124089	0.136458	0.210945	0.145685
LPC(22:6) (µmol/L)	0.0641441	0.093878	0.146432	0.0441619	0.0655131	0.0988573	0.0661547	0.10904	0.171627	0.0540807	0.0746646	0.124172	0.0646112	0.0940732	0.153779	0.0477925	0.0678235	0.100686	0.0656495	0.107241	0.174093	0.0873032	0.119125	0.180302	0.0802855	0.117414	0.166125	0.0782334	0.128686	0.189062	0.0664737	0.114938	0.172173	0.0818329	0.128063	0.177973	0.0432755	0.0769166	0.131022	0.0274074	0.0691766	0.0752949	0.095585	0.143779	0.203476	0.0383519	0.0691766	0.100143	0.095585
SM(d18:1/16:0) (µmol/L)	68.2345	79.4486	93.1472	62.1176	72.8031	94.5457	75.1271	80.4448	84.6495	69.9505	79.5032	95.8036	68.6852	80.2777	90.9454	65.6593	77.6508	94.6105	75.5274	85.5638	100.631	79.9589	94.2521	100.397	68.0573	76.9809	92.4553	81.1168	98.4233	120.587	74.1784	82.7065	99.5899	80.6139	97.608	109.441	67.601	70.8886	114.753	64.2748	87.6275	103.944	77.2749	84.2689	108.378	66.1934	75.7791	103.878	77.2749
SM(d18:1/18:0) (µmol/L)	11.7874	13.4071	15.9301	11.1266	13.6131	15.0786	10.9505	13.6509	16.5776	12.1959	14.4543	17.0751	11.5109	13.4257	15.9881	11.7365	13.8992	15.5401	12.9415	15.3368	17.5443	14.0989	16.1241	19.0526	11.2371	13.8801	16.1805	13.6983	17.0173	20.3214	12.4057	15.0004	17.0764	13.8181	16.6324	19.8067	12.8833	14.2012	17.7849	11.5019	13.5332	18.1638	12.492	16.6094	20.1531	12.4841	13.8776	17.8252	12.492
SM(d18:1/18:1(9Z)) (µmol/L)	6.77715	8.16486	11.2623	6.99793	9.20188	12.3933	5.86622	7.93884	10.863	7.69006	10.4295	12.767	6.57471	8.16203	11.2428	7.31029	9.40174	12.4057	7.34075	9.35623	13.5379	6.68981	7.8425	15.6528	5.75281	8.0246	10.8566	7.47425	9.59929	13.0044	7.08088	8.71758	13.1585	7.2388	8.6334	13.2993	9.32391	14.4549	21.6368	6.05411	8.63548	12.3957	7.77007	9.70634	12.2774	8.10845	11.2098	20.1182	7.77007
SM(d18:1/20:0) (µmol/L)	48.3005	74.2308	100.323	45.5518	70.7632	98.8347	47.6719	71.6517	103.97	58.1176	99.8376	142.849	48.3327	73.8706	99.7281	49.6915	80.5564	121.594	66.8534	89.7555	118.68	61.5867	93.5078	115.291	47.2658	65.7548	108.158	73.615	99.7281	158.565	61.1775	83.5709	117.208	69.4104	97.1356	134.684	50.7884	111.154	169.641	55.5023	66.5146	154.667	60.8392	95.7319	143.502	58.9015	87.0783	144.644	60.8392
SM(18:1/20:1) (µmol/L)	4.25715	6.0022	8.6665	4.89712	7.20964	9.50989	3.81714	6.02069	10.9175	6.13565	8.65616	12.0082	4.13225	6.02069	8.74785	5.01736	7.86762	10.274	4.71392	7.24471	10.1889	5.61105	6.65356	9.86232	3.5584	5.65267	7.94067	4.70087	7.75931	10.3455	4.49689	6.4038	9.40174	4.9716	7.4898	10.1866	6.59303	9.70387	11.3659	5.09578	6.44555	8.77819	4.45038	6.57471	7.85128	5.77454	7.96053	10.7384	4.45038
SM(d18:1/22:0) (µmol/L)	83.4988	122.837	150.95	98.5598	134.264	165.471	85.8906	124.926	143.105	111.2	135.016	168.816	84.5614	124.753	149.7	103.532	134.264	165.757	99.1766	119.837	147.946	94.5407	129.806	140.922	82.7592	110.365	145.329	100.144	140.063	177.162	95.6656	116.479	147.741	101.338	134.078	158.566	89.9788	127.003	164.563	77.7588	118.376	201.497	114.003	135.95	158.016	83.4528	127.003	178.166	114.003
SM (d18:0/24:0) (µmol/L)	16.2817	20.188	27.1982	15.6429	20.181	24.747	15.5896	19.0924	25.2998	17.393	20.5721	26.7329	16.2225	20.181	27.0945	16.1328	20.2371	25.5266	17.1713	20.6194	28.5403	19.3319	21.8965	25.1245	14.8298	17.6914	20.8737	17.3989	21.9923	28.481	16.449	19.2786	26.74	17.6933	21.9923	28.481	17.5825	23.3816	28.5164	13.2617	20.036	25.3913	14.5902	18.3783	22.1453	16.284	20.7412	28.2704	14.5902
SM(d18:1/26:0) (µmol/L)	0.117089	0.158212	0.20341	0.120444	0.14488	0.185444	0.120121	0.146597	0.176432	0.111952	0.139124	0.200867	0.118415	0.154956	0.196272	0.120235	0.141309	0.190905	0.141016	0.161985	0.215227	0.119711	0.143563	0.187128	0.126566	0.150511	0.193656	0.145181	0.171221	0.216724	0.138497	0.160198	0.207176	0.137356	0.16436	0.199809	0.137332	0.15685	0.296458	0.104384	0.152725	0.177483	0.0997823	0.155602	0.237324	0.133887	0.15685	0.182425	0.0997823
SM(d18:0/14:0) (µmol/L)	0.255154	0.320508	0.420428	0.253579	0.323296	0.374472	0.245366	0.321731	0.387432	0.274099	0.346995	0.399618	0.2526	0.321063	0.414639	0.26886	0.336325	0.380226	0.32352	0.374472	0.425411	0.298115	0.343552	0.509674	0.246293	0.308219	0.406688	0.311203	0.416656	0.477287	0.29977	0.368804	0.423058	0.309594	0.379436	0.486732	0.344481	0.441656	0.472224	0.315668	0.436462	0.535635	0.339369	0.36906	0.473333	0.331767	0.436462	0.482241	0.339369
SM(d18:0/20:0) (µmol/L)	51.3016	69.021	92.6957	53.5916	69.0193	80.7243	53.0474	69.0672	101.261	63.6133	90.8676	120.473	51.3726	69.0672	92.9851	58.2396	70.4207	95.7983	68.4476	82.9936	104.18	76.0174	100.83	124.277	49.9027	73.056	105.597	66.2537	82.8212	128.973	63.7754	79.9446	105.05	69.5032	84.5614	123.703	56.357	63.4531	97.2988	44.2752	71.118	119.669	64.0856	72.15	112.98	53.2869	63.4531	102.674	64.0856
SM(d18:1/22:1) (µmol/L)	37.5951	52.5616	65.7504	47.7008	61.9455	75.6065	37.7747	46.6216	57.6073	49.9571	61.7353	87.287	37.7637	51.5153	65.4322	48.9735	61.9455	75.8947	42.1929	53.2212	74.6944	37.8449	48.5977	54.7339	33.63	45.7948	69.175	37.7899	57.4378	68.5426	40.3062	52.3431	72.15	39.09	52.6707	64.7358	51.01	72.4135	96.6029	39.6479	54.5984	77.6769	42.2514	54.1515	57.7572	47.3075	59.9617	89.2435	42.2514
SM(d18:1/24:0) (µmol/L)	20.2556	23.6943	31.704	19.9075	24.1503	30.1899	17.2097	23.4248	29.4827	21.8758	26.3523	34.0932	20.0415	23.4979	31.4109	20.5423	24.8552	30.639	21.3738	24.8423	34.0799	23.0901	24.7353	27.7951	19.0378	24.0894	28.0878	22.8156	25.5915	32.7687	21.2272	24.4722	31.7289	22.9698	25.445	31.3527	23.6459	27.5078	33.7108	19.9868	22.169	27.8487	19.7075	20.7933	24.447	21.1742	24.7021	33.3888	19.7075
SM(d18:1/24:1) (µmol/L)	37.5351	47.145	57.7786	35.4656	40.5647	52.5367	38.0863	50.6774	65.4303	43.0685	50.8409	59.1672	37.6378	47.6404	58.5904	36.2335	43.9364	55.7933	45.7986	54.2813	67.527	56.6551	61.2513	72.0691	42.447	50.8682	60.1035	48.4273	60.8872	71.0681	44.8551	54.1693	66.0409	50.6034	60.8872	70.7969	39.6419	52.4054	70.7119	35.4612	41.5372	53.5828	49.3572	57.5504	65.3454	37.9007	45.1882	65.5734	49.3572
SM(d18:1/26:1) (µmol/L)	0.357664	0.423939	0.566555	0.324025	0.383933	0.454682	0.345728	0.497555	0.655613	0.316089	0.396793	0.469569	0.357478	0.42748	0.581934	0.324194	0.385533	0.454997	0.427776	0.511898	0.650188	0.477983	0.622358	0.7204	0.3568	0.452971	0.666166	0.520124	0.58924	0.775892	0.409214	0.505551	0.65109	0.5169	0.58924	0.756525	0.337363	0.422447	0.573724	0.331408	0.340711	0.396838	0.449355	0.565237	0.720429	0.331408	0.363817	0.497054	0.449355
PC(14:0/14:0) (µmol/L)	0.0809602	0.151025	0.252238	0.0770997	0.123352	0.246107	0.0582431	0.161752	0.207702	0.0798612	0.161867	0.284287	0.075722	0.151339	0.251714	0.0791567	0.130205	0.258432	0.0960451	0.170738	0.285954	0.159464	0.215428	0.302253	0.138705	0.207615	0.307019	0.10096	0.203325	0.32038	0.102086	0.174567	0.296655	0.103727	0.206163	0.306374	0.0841002	0.107907	0.145937	0.0913669	0.197407	0.247024	0.0645632	0.137438	0.242634	0.0913669	0.113592	0.220742	0.0645632
PC(14:0/18:1) (µmol/L)	1.45994	1.93973	2.65987	1.55548	2.17175	2.74129	1.28692	1.88277	2.42836	1.74212	2.35442	3.24854	1.43879	1.93704	2.60603	1.62998	2.30355	2.88157	1.59091	2.15376	2.75463	1.67564	2.16454	2.85324	1.6714	2.05274	3.65726	1.62772	2.46204	2.87359	1.60977	2.15227	2.82423	1.66229	2.46204	2.86862	1.3629	1.52277	1.82857	1.76861	2.29246	3.80827	1.46495	1.77874	2.67003	1.44529	1.81503	2.64114	1.46495
PC(14:0/18:2) (µmol/L)	2.21321	3.27365	4.39803	2.48882	3.8714	5.17647	2.08141	2.29717	3.96061	2.67797	3.80386	4.91857	2.17929	3.17742	4.16367	2.64608	3.85266	5.03453	2.44504	3.34002	5.02059	2.76922	3.34002	4.1589	2.65743	3.49305	4.42335	1.98874	2.63145	3.87677	2.51901	3.34465	4.97555	2.08478	2.86762	3.97032	2.54415	2.90283	4.56709	2.5449	4.3454	5.50406	1.84274	2.62053	4.36765	2.5449	3.61236	4.68463	1.84274
PC(14:0/18:3) (µmol/L)	0.0306268	0.0614438	0.0892176	0.0323164	0.0604907	0.091151	0.042585	0.0711919	0.0920167	0.0517118	0.0791863	0.124146	0.0334896	0.0646528	0.0905499	0.0389794	0.0619761	0.0997774	0.0383098	0.0761431	0.114297	0.0518224	0.0757137	0.104693	0.0516268	0.0734479	0.141463	0.0476908	0.0594515	0.0992944	0.0422723	0.075722	0.119233	0.0503219	0.0597406	0.0995705	0.0508692	0.0654872	0.0835127	0.05702	0.0867818	0.0993797	0.0419221	0.0518632	0.109261	0.0521363	0.0688096	0.0898463	0.0419221
PC(14:0/20:3) (µmol/L)	0.111156	0.176575	0.276948	0.121572	0.187746	0.275166	0.0943355	0.172045	0.261598	0.147065	0.220785	0.323287	0.109489	0.176514	0.274877	0.132573	0.202621	0.293994	0.11025	0.180348	0.29176	0.123826	0.180857	0.195691	0.142447	0.188037	0.284811	0.0765665	0.17481	0.220501	0.117266	0.184649	0.291356	0.0946448	0.175782	0.214473	0.103154	0.147008	0.246225	0.144729	0.177587	0.23872	0.09492	0.130748	0.194907	0.105655	0.174629	0.216409	0.09492
PC(14:0/20:4) (µmol/L)	0.336775	0.478109	0.719913	0.417058	0.599926	0.743476	0.249168	0.502034	0.691029	0.273594	0.563154	0.876276	0.328475	0.482251	0.709491	0.39828	0.59785	0.797113	0.357213	0.567564	0.783419	0.466003	0.665146	0.855503	0.42001	0.591887	0.818675	0.301422	0.579089	0.786139	0.371351	0.573496	0.80824	0.357109	0.595782	0.789972	0.269179	0.53963	0.733762	0.499859	0.597625	0.708507	0.336541	0.37968	0.486954	0.33709	0.566078	0.703718	0.336541
PC(14:0/20:5) (µmol/L)	0.0147796	0.0297004	0.0580065	0.00739314	0.0132658	0.0263888	0.013148	0.0394962	0.0589816	0.0157928	0.027987	0.0442205	0.0143069	0.031182	0.0569112	0.0092962	0.017984	0.0330743	0.0124463	0.0360678	0.0752511	0.0335559	0.0528617	0.079503	0.0206617	0.0405656	0.0948342	0.0126902	0.0328004	0.0951176	0.0156777	0.0388176	0.07546	0.0147854	0.040889	0.0916874	0.0107094	0.0282196	0.038304	0.00461015	0.0157314	0.0379568	0.0130018	0.0324386	0.0483566	0.00855934	0.0195291	0.0371151	0.0130018
PC(14:0/22:5) (µmol/L)	0.0596057	0.0976944	0.137605	0.0422139	0.0805404	0.127653	0.0359914	0.0909272	0.117801	0.0440872	0.0774725	0.140231	0.0569507	0.0966462	0.136489	0.0423309	0.0805404	0.136773	0.0650574	0.100611	0.154091	0.0824214	0.125943	0.1868	0.0861984	0.143027	0.184975	0.0541407	0.0957792	0.144471	0.0692451	0.111248	0.158753	0.0694288	0.0965123	0.146863	0.0200616	0.0883563	0.132965	0.0342374	0.112982	0.141498	0.0541031	0.110787	0.178235	0.031018	0.103766	0.13626	0.0541031
PC(14:0/22:6) (µmol/L)	0.0394623	0.0707026	0.115961	0.029114	0.0495097	0.0973696	0.0399132	0.0571088	0.111216	0.039454	0.06086	0.0930094	0.039551	0.0696302	0.115172	0.0302244	0.0596579	0.0921965	0.0497505	0.0756695	0.132206	0.0740035	0.0908958	0.112102	0.0504585	0.127664	0.160607	0.0410309	0.0682445	0.145678	0.0497505	0.0837862	0.139938	0.0507647	0.074576	0.11288	0.030458	0.0688597	0.111556	0.0295435	0.066101	0.0905369	0.0575459	0.0942644	0.160635	0.0311183	0.066101	0.0998108	0.0575459
PC(16:0/14:0) (µmol/L)	0.768512	1.13474	1.62857	0.591258	0.942037	1.73794	0.476187	1.0957	1.37794	0.853271	1.33418	1.82274	0.75936	1.10946	1.62547	0.745281	1.12495	1.74818	0.794906	1.25167	1.7349	1.58457	1.6791	1.93745	0.871478	1.533	2.00406	0.980002	1.66539	2.24522	0.806002	1.32487	1.79235	1.22687	1.66539	1.99637	0.621102	0.880217	1.3235	0.930145	1.46291	1.98	0.804328	1.30573	2.31315	0.68854	1.03617	1.55672	0.804328
PC(16:0/16:0) (µmol/L)	15.2806	17.8565	22.0601	15.0778	18.518	22.1366	14.1758	18.4411	24.6315	15.7155	18.836	25.3987	15.0726	18.1369	22.2211	15.1985	18.6597	22.7825	15.188	18.5052	26.6462	15.622	22.4773	26.7075	15.3129	19.6351	30.026	16.9576	19.8196	33.6109	15.188	18.894	26.7201	16.9107	20.3063	32.4312	14.3612	16.9355	21.0556	16.4782	17.4118	25.277	17.7637	19.916	28.7972	15.6201	17.4118	22.0865	17.7637
PC(16:0/16:1) (µmol/L)	3.02589	4.40125	6.44694	3.80259	4.64879	6.80165	2.6613	4.53737	9.69093	3.78399	6.97528	13.1856	3.01646	4.45016	6.51993	3.80226	5.19764	7.50502	3.57974	5.3586	8.71715	4.41607	7.41017	9.23695	3.66673	5.24126	8.72663	4.7399	5.62111	10.2949	3.59715	5.28849	8.71715	4.8116	6.45249	9.80269	2.67391	4.04	5.16175	2.43051	3.74595	11.473	3.39369	5.16531	7.46352	2.46253	3.9902	5.67689	3.39369
PC(16:0/18:0) (µmol/L)	5.01548	5.89445	7.02073	4.96522	5.9375	7.06092	4.82105	5.69958	7.10117	5.69477	6.6882	7.839	4.99975	5.88424	7.00243	5.1689	6.09175	7.31499	5.41085	6.29784	7.68399	4.9194	6.57826	8.71527	5.42524	6.07938	8.9659	5.88016	7.24937	8.91884	5.41085	6.24134	7.74817	5.86391	7.16942	8.66369	4.87241	5.85107	6.99856	4.39563	6.7164	9.41413	5.88424	6.48387	6.95406	4.70732	5.85107	7.398	5.88424
PC(16:0/18:1) (µmol/L)	96.2763	121.335	150.63	94.5713	116.312	152.169	99.1083	135.566	169.768	111.072	135.332	183.449	97.1981	122.095	151.782	103.24	121.167	154.864	107.998	129.954	158.997	105.381	144.059	229.144	96.929	125.441	184.229	127.191	143.197	202.371	106.29	128.699	164.148	125.969	143.197	203.428	97.0599	109.101	135.147	80.3831	100.068	250.127	110.42	127.015	164.947	90.6623	107.924	142.161	110.42
PC(16:0/18:2) (µmol/L)	257.847	453.785	702.624	315.579	568.831	771.777	309.142	444.136	828.285	362.541	507.452	812.767	278.369	452.212	706.162	315.579	551.362	763.697	277.022	488.717	798.892	263.377	503.052	713.636	274.484	492.174	795.76	327.161	573.185	804.448	277.022	488.717	798.892	304.512	523.431	784.337	278.287	313.216	653.988	264.3	395.467	942.718	328.752	496.915	876.649	276.018	313.216	691.209	328.752
PC(16:0/18:3) (µmol/L)	1.96035	2.60965	3.79897	2.02626	2.80083	3.90919	2.34224	3.52801	5.15577	2.33839	4.03205	4.91437	2.0235	2.67188	3.98576	2.22971	3.14892	4.52167	2.24522	3.40548	4.38889	2.85143	3.91319	5.12438	2.15315	2.67844	5.04436	2.60423	3.27355	4.56893	2.19901	3.18845	4.70064	2.68871	3.27355	4.79863	2.95275	3.14596	3.5452	2.1809	2.92302	4.06191	2.84979	3.10126	4.43169	2.655	3.09162	3.60384	2.84979
PC(16:0/20:1) (µmol/L)	0.933751	1.2036	1.4874	0.787532	0.9999	1.22444	0.96901	1.18006	1.77587	0.976674	1.36971	1.53699	0.934882	1.19819	1.55171	0.851959	1.06205	1.37636	1.10715	1.3304	1.63564	1.14023	1.63584	2.15883	1.15912	1.42943	1.69998	1.30935	1.55709	1.97227	1.12807	1.3678	1.65618	1.30799	1.55709	1.99789	0.801632	1.05106	1.31049	0.875952	1.19354	1.43269	1.53885	1.73972	2.16573	0.861771	1.14317	1.36932	1.53885
PC(16:0/20:2) (µmol/L)	3.84867	5.31243	8.32447	4.09642	5.12608	9.62214	3.90419	5.24832	8.61509	5.38187	6.27451	9.97058	3.85266	5.28849	8.31581	4.37977	5.45605	9.63882	4.48733	5.89649	8.16162	4.49146	5.01146	10.3374	4.1811	5.52319	10.614	4.84621	6.40348	9.75983	4.34651	5.82742	9.33633	4.65565	6.04548	9.74295	3.93222	6.06279	9.08382	3.96575	5.59372	10.1901	5.11543	6.90603	8.42021	4.12332	6.06279	9.5691	5.11543
PC(16:0/20:3) (µmol/L)	21.0333	27.5861	42.8549	21.9461	25.9175	36.8892	20.3599	23.8821	38.9816	23.8886	33.9279	63.3092	21.037	27.2627	42.6909	23.2774	28.0097	45.8184	20.5755	29.9785	92.0826	21.0567	28.3984	80.349	23.6812	29.1025	48.7509	25.139	30.736	48.1965	22.0676	29.6068	68.3494	24.9918	30.6084	46.5516	17.3866	79.2679	172.213	24.051	31.7857	67.2196	23.2612	26.7758	40.5002	21.6888	31.7857	135.925	23.2612
PC(16:0/20:4) (µmol/L)	39.8529	54.4499	73.1918	47.1401	58.8046	77.5135	44.8992	64.0824	106.038	37.9926	57.0513	115.218	40.0535	55.5169	76.1544	46.2011	58.8046	78.1328	42.1616	58.1963	76.2601	44.8692	56.6071	94.2111	41.4831	62.3301	94.2487	47.3029	59.957	88.7611	42.1616	59.957	80.4408	47.3357	59.957	86.7178	47.5357	51.0962	74.8987	36.4308	44.8295	154.232	48.4981	58.9678	93.1095	43.6995	48.684	83.8568	48.4981
PC(16:0/20:5) (µmol/L)	1.75982	3.3541	6.15222	1.20998	1.88407	2.92387	2.61098	5.60555	11.605	1.52353	2.46642	4.81214	1.78739	3.53536	6.52445	1.36212	2.05887	3.01228	2.29717	5.06252	9.8073	5.0321	6.3347	14.2406	2.40497	6.09038	11.6047	2.62598	5.60944	11.8257	2.29717	5.66021	10.5477	3.12515	5.64845	11.992	1.83051	2.85083	4.97883	1.02983	1.74116	3.77938	3.93634	4.16367	6.84408	1.45847	2.69141	4.20397	3.93634
PC(16:0/22:4) (µmol/L)	1.57639	2.30042	2.9159	2.21508	2.87359	3.54395	1.46404	1.95187	3.11743	2.17486	2.72487	3.87925	1.55494	2.20971	2.97081	2.21431	2.81641	3.54763	1.68629	2.27026	3.29404	1.22641	1.62575	2.75932	1.38486	1.97468	3.59432	1.80858	2.23435	3.21063	1.60977	2.21892	3.35161	1.78375	2.06889	3.01547	2.29106	2.59044	3.11557	1.70083	2.7706	4.54022	1.34151	1.61872	2.30195	2.15931	2.59044	3.54916	1.34151
PC(16:0/22:5) (µmol/L)	9.82445	14.8233	23.3099	11.8184	15.7672	22.4488	12.3371	15.7891	24.2165	9.53257	17.1832	26.2155	10.4025	15.2301	23.2451	11.671	15.7672	22.83	10.4676	18.2125	25.5784	7.93193	19.649	26.8511	12.2237	17.2558	31.4092	13.4065	17.5191	25.8279	11.1028	18.0241	26.0616	13.089	17.7145	26.274	10.7477	13.9841	17.3405	9.57394	13.1067	23.2999	10.555	16.414	24.115	10.2622	13.8348	18.5825	10.555
PC(16:0/22:6) (µmol/L)	5.80727	8.49348	12.1735	4.37371	5.94986	9.17637	6.33287	9.84135	13.8505	3.5275	6.23896	11.6449	5.87609	8.52592	12.1077	4.36765	6.08331	9.57887	6.57439	9.9511	15.3573	7.07047	11.4108	13.5988	9.45214	12.905	15.0622	8.13903	11.6387	15.7563	7.21929	11.1105	15.3042	7.68667	11.6387	14.7412	4.74982	8.53713	13.5161	5.25624	5.8207	8.3777	11.1878	15.4534	17.4343	5.25624	6.6749	11.9583	11.1878
PC(16:1/18:1) (µmol/L)	3.93363	5.5752	8.19281	5.59641	7.51023	11.3367	3.99702	5.24469	6.63935	5.73725	7.61814	11.1812	3.93907	5.45983	8.09402	5.71541	7.5363	11.0875	4.19845	5.92517	8.68699	2.73585	4.70941	7.21931	3.95316	5.4462	8.69955	4.58161	5.81531	8.43189	4.19845	5.81934	8.68699	4.55321	5.0942	8.19895	3.89357	6.84746	11.1596	5.80877	6.53723	13.2851	3.983	5.34747	8.52592	4.4128	6.53723	11.8855	3.983
PC(16:1/18:2) (µmol/L)	1.15521	1.73138	2.56173	1.56869	2.17627	2.91789	1.01217	1.59533	2.19502	1.4867	2.09278	3.26795	1.1367	1.6677	2.4723	1.51977	2.11236	3.21508	1.2166	1.89586	2.83993	1.02154	1.36071	2.10996	0.868284	1.48697	2.60246	0.898666	1.31117	2.51029	1.16623	1.76401	2.77186	0.965123	1.35741	2.24224	2.33216	3.61363	4.76732	1.31625	1.7997	3.83359	0.961832	1.44179	1.99841	1.56968	2.54993	4.0427	0.961832
PC(18:0/16:1) (µmol/L)	0.33853	0.492073	0.72302	0.357492	0.514362	0.630648	0.337488	0.59951	1.02446	0.453677	0.606914	1.02754	0.338647	0.504825	0.746832	0.376274	0.543313	0.844317	0.423624	0.566385	0.843732	0.463355	0.694936	0.836617	0.405865	0.551861	1.13166	0.456237	0.669361	1.06648	0.423624	0.563253	0.911842	0.464282	0.669361	0.97254	0.341305	0.48017	0.586641	0.288064	0.455069	1.28837	0.393888	0.67542	1.02872	0.321255	0.48017	0.598582	0.393888
PC(18:0/18:1) (µmol/L)	33.88	43.588	55.2103	32.8624	43.0773	55.5218	32.6998	40.5845	58.1832	38.9406	44.9067	60.6771	33.7042	43.4974	55.5554	35.5027	43.952	56.6442	37.3453	48.4645	58.7231	36.1875	59.0071	61.3458	33.7685	41.8848	54.3143	42.6022	50.698	61.3442	35.3064	44.2577	56.5657	42.6022	51.5484	61.217	32.1813	40.687	46.4456	30.3157	38.0107	65.192	37.036	46.3294	60.374	31.7209	40.6725	47.135	37.036
PC(18:0/18:2) (µmol/L)	147.211	220.165	316.1	167.834	236.69	357.023	157.43	212.874	353.654	185.254	225.328	376.319	150.316	217.799	323.553	177.769	236.035	357.762	158.557	231.98	308.442	133.122	187.576	312.544	149.854	217.498	378.211	154.221	277.406	356.771	156.808	223.923	318.656	147.919	264.818	352.134	141.848	183.825	304.728	145.369	184.791	373.542	180.751	261.716	327.161	146.44	184.791	312.188	180.751
PC(18:0/18:3) (µmol/L)	0.734776	1.06686	1.79561	0.845504	1.07241	1.6266	1.00338	1.28597	1.76221	1.01527	1.50109	2.30327	0.79988	1.10639	1.77382	0.866851	1.20652	1.85171	0.887523	1.24475	1.76523	1.24376	1.83367	2.03428	0.825419	1.2436	1.83211	1.21744	1.52083	2.09051	0.882003	1.24475	1.76523	1.2311	1.52083	2.08041	1.05987	1.27002	1.38666	0.753062	1.35712	2.2525	1.17353	1.43979	2.15227	0.906009	1.27002	1.719	1.17353
PC(18:0/20:0) (µmol/L)	0.34403	0.453243	0.590643	0.306933	0.398004	0.537695	0.307653	0.443147	0.73129	0.229113	0.393193	0.530961	0.340531	0.452772	0.594544	0.302678	0.398004	0.536577	0.381791	0.525898	0.658774	0.355773	0.437745	0.619869	0.445227	0.54714	0.701811	0.34409	0.438867	0.599095	0.397729	0.529924	0.663816	0.352393	0.438867	0.590298	0.436103	0.507536	0.714404	0.36706	0.421221	0.634646	0.508337	0.664737	0.695372	0.387307	0.468282	0.651616	0.508337
PC(18:0/20:1) (µmol/L)	0.490007	0.621944	0.817965	0.404264	0.567958	0.69833	0.40288	0.550516	0.700696	0.504531	0.595499	0.804586	0.484261	0.596608	0.804328	0.423918	0.56993	0.734002	0.486954	0.660146	0.859075	0.477709	0.675292	0.96281	0.570342	0.752809	0.877476	0.630189	0.786139	0.969193	0.524806	0.664277	0.862058	0.628012	0.775854	0.939886	0.42394	0.548587	0.586907	0.397174	0.625414	0.786344	0.634132	0.798772	0.988187	0.415118	0.568586	0.6303	0.634132
PC(18:0/20:2) (µmol/L)	3.22796	3.98025	5.14568	3.42808	4.20719	5.28117	3.07643	3.74731	4.23406	3.58924	4.0372	5.92238	3.19952	3.91729	4.8094	3.4602	4.17523	5.28849	3.43392	4.35254	5.38093	3.73221	4.22785	5.3586	3.25823	4.16516	5.36517	3.51094	4.26296	5.41461	3.43392	4.31648	5.38093	3.66782	4.26296	5.27212	3.41873	4.14943	4.89555	2.98083	3.14215	5.03301	3.61465	4.35857	6.02874	3.00342	3.85211	4.82481	3.61465
PC(18:0/20:3) (µmol/L)	14.6022	17.6786	27.6768	14.5038	18.3519	22.6824	11.5064	16.2217	20.3101	16.0289	21.7864	33.7875	14.1316	17.4948	26.4438	14.896	20.4334	24.5535	15.4213	19.3044	32.7826	11.2422	17.2153	34.0921	14.8876	18.3013	31.1647	16.4482	18.5437	29.8541	15.4213	18.9202	32.3312	15.8623	18.5437	27.1444	11.2552	31.0219	75.9363	18.2001	19.7686	34.0224	16.1768	19.2376	21.1686	16.1555	20.4122	57.1906	16.1768
PC(18:0/20:4) (µmol/L)	26.366	35.1723	45.4551	29.3722	39.3654	50.5221	25.798	40.8668	67.6166	23.5657	32.4885	67.6036	26.3523	35.3064	46.4902	28.5785	37.7618	60.5836	27.4904	35.1355	48.2299	21.5171	31.8309	51.8378	25.905	36.8196	59.7705	30.187	35.7744	56.7228	27.3005	35.3553	50.4176	28.4579	34.2221	56.41	28.3254	38.8612	53.999	27.7932	31.8253	95.3161	26.1884	31.2299	43.952	27.8434	34.6443	56.9317	26.1884
PC(18:0/20:5) (µmol/L)	1.06428	2.2032	5.15524	0.665844	0.960499	2.11129	1.27128	2.87559	9.17637	0.887911	2.36343	3.75399	1.10103	2.35032	5.50162	0.69009	1.09418	2.99147	1.4731	4.0386	7.67335	2.45488	2.59433	13.0201	1.64181	3.55219	8.26738	1.44379	2.96258	5.31053	1.59976	3.76554	7.77507	2.01667	2.84387	5.0007	1.31466	5.88482	7.40951	0.96729	1.46511	2.0984	1.85685	3.33077	3.79699	1.01513	2.11785	7.30615	1.85685
PC(18:0/22:4) (µmol/L)	1.00965	1.43829	1.9577	1.59758	2.00257	2.35298	0.938129	1.09267	1.77576	1.26399	2.08204	2.63852	0.992305	1.39848	1.94512	1.52188	2.00674	2.38974	1.03876	1.42194	2.03617	0.8394	1.07887	1.39509	0.925213	1.2896	2.23808	1.09191	1.3443	1.51032	1.02517	1.36875	2.12116	1.0736	1.32029	1.49781	1.2253	1.71848	2.56279	1.17008	1.45813	2.7022	0.869258	1.43381	1.55494	1.17946	1.52827	2.69748	0.869258
PC(18:0/22:5) (µmol/L)	3.60402	4.91727	6.29474	3.58254	5.00322	6.84189	3.68185	4.6039	6.26677	4.12926	5.38934	7.82126	3.61967	4.91045	6.26735	3.76815	5.02059	7.14461	4.36462	5.16174	6.71718	3.74572	4.23514	6.18407	3.74672	5.45346	7.37132	4.03021	5.0801	6.91082	4.1579	5.17607	7.02674	4.0626	4.45633	6.82566	3.81636	6.17554	7.42644	2.8419	4.89108	7.79059	4.01071	5.02755	6.08331	3.15714	5.9729	7.19654	4.01071
PC(18:0/22:6) (µmol/L)	1.98478	2.76516	4.29812	1.40009	2.4097	3.36128	2.14205	3.05645	4.99456	1.31097	2.05325	3.38062	2.10797	2.77379	4.39803	1.37922	2.17175	3.34929	2.38809	3.44345	5.25925	2.56949	3.52655	4.34452	2.86554	4.23599	5.73356	2.45693	3.78123	4.67464	2.41472	3.76032	5.53989	2.56255	3.68294	4.5547	1.89679	2.64713	4.93052	1.79947	2.22123	2.69685	3.65496	4.36765	6.81567	1.84671	2.49606	3.23364	3.65496
PC(18:1/18:1) (µmol/L)	22.5787	32.715	43.8406	29.0679	38.6355	55.7336	24.4524	29.9577	42.1882	26.6441	39.9161	53.1462	22.941	32.3985	43.1969	29.0579	38.716	53.9614	22.3446	33.2402	46.458	15.4146	25.3456	33.834	20.5826	31.2759	48.844	22.2673	31.9303	42.8688	22.0676	32.5561	46.8461	21.565	26.9247	42.0527	29.1514	38.6632	56.979	25.4777	38.8914	60.7496	20.0963	33.3787	41.5523	29.5334	38.6632	56.8606	20.0963
PC(18:1/18:2) (µmol/L)	73.23	116.071	162.933	93.9436	135.285	194.857	65.3204	101.537	164.125	81.0592	91.8294	213.119	71.7972	111.342	162.338	86.9947	129.415	201.81	65.6106	112.039	193.187	56.8855	67.7178	88.5001	67.1403	105.405	142.726	38.13	67.2217	151.467	66.2963	110.267	174.473	41.5973	67.2217	131.999	133.432	211.259	291.604	79.3089	140.392	217.602	47.7311	103.67	178.881	123.165	162.983	290.394	47.7311
PC(18:1/18:3) (µmol/L)	0.33871	0.486795	0.679882	0.401468	0.632815	0.958179	0.417297	0.53472	0.731431	0.549372	0.635234	0.933206	0.341713	0.49822	0.703127	0.478256	0.633693	0.954526	0.390625	0.548611	0.811609	0.272745	0.497431	0.900554	0.287395	0.465142	0.8527	0.424212	0.616365	0.747868	0.34409	0.541809	0.821229	0.378769	0.596195	0.767276	0.454715	0.54133	0.768195	0.368516	0.57243	1.0708	0.354009	0.53956	0.638986	0.434715	0.552046	0.810715	0.354009
PC(18:1/20:1) (µmol/L)	0.323056	0.481279	0.636035	0.340531	0.490681	0.628015	0.262977	0.375232	0.693578	0.355581	0.503269	0.764907	0.320602	0.470366	0.647008	0.341239	0.494094	0.666121	0.367256	0.540683	0.689134	0.320406	0.519118	0.666951	0.363583	0.511677	0.697659	0.342899	0.469064	0.631501	0.365225	0.529556	0.689134	0.35597	0.476932	0.647659	0.465153	0.513359	0.817152	0.266586	0.373366	0.51894	0.298304	0.509395	0.841979	0.362541	0.491385	0.594681	0.298304
PC(18:1/20:2) (µmol/L)	0.8843	1.27179	1.73313	1.26871	1.53779	1.96639	0.730044	1.07837	1.5193	1.15291	1.53079	2.17862	0.882003	1.22676	1.66654	1.25167	1.53779	1.99841	0.786139	1.11408	1.6898	0.656396	0.701203	1.00138	0.840245	1.10436	1.70795	0.813298	1.01105	1.40139	0.819523	1.11408	1.6898	0.683245	0.9068	1.36875	0.889871	1.48544	2.16244	0.898412	1.48872	2.07979	0.783419	1.16623	1.3946	0.899483	1.48872	2.08014	0.783419
PC(18:1/20:3) (µmol/L)	2.80525	4.27049	6.16076	4.05825	5.28116	8.01266	2.29963	3.02064	5.38653	3.40324	5.35294	7.739	2.7337	4.13205	6.07488	4.0386	5.28116	7.81831	2.64608	3.8234	6.51993	1.7103	2.43889	4.12934	2.38852	4.1916	6.07717	2.64425	3.51825	4.52481	2.53829	3.87946	6.43909	2.46394	3.31006	4.45381	4.41715	5.5006	8.23689	4.43773	5.2465	7.09481	2.58983	3.16862	4.77949	4.4371	5.2465	7.81179	2.58983
PC(18:1/20:4) (µmol/L)	16.149	23.1647	33.2517	23.8905	28.0292	39.9015	15.5748	19.3983	26.1479	18.4367	24.2325	33.7107	16.0874	22.9728	32.5335	22.0982	25.9535	38.2359	15.1564	20.8338	35.8737	10.2001	12.7874	28.9074	13.0738	20.641	30.3314	11.0951	17.6043	23.1647	14.6604	20.8338	32.2417	10.8909	17.5799	24.2218	22.3629	29.6299	35.2759	22.3565	25.8704	30.4207	10.6432	17.111	21.5088	22.5267	28.4697	32.1192	10.6432
PC(18:1/20:5) (µmol/L)	0.297788	0.442089	0.792455	0.238125	0.31905	0.489365	0.397845	0.487629	0.909776	0.244821	0.384722	0.598733	0.311403	0.447158	0.817821	0.243984	0.342424	0.516148	0.352051	0.600758	1.04453	0.462991	0.704108	1.13398	0.409097	0.651057	1.29601	0.32127	0.539934	0.953204	0.38047	0.637217	1.0739	0.354844	0.539934	0.92376	0.463233	0.523357	0.871829	0.220519	0.344557	0.508071	0.39171	0.65604	0.721392	0.287089	0.474321	0.659918	0.39171
PC(18:1/22:4) (µmol/L)	0.153158	0.314134	0.57576	0.406108	0.561305	0.908691	0.109662	0.168038	0.605368	0.250436	0.505888	0.823957	0.143573	0.287544	0.601592	0.348893	0.557041	0.899912	0.14268	0.251017	0.575487	0.0839706	0.13877	0.151494	0.127171	0.192557	0.724075	0.132665	0.203748	0.329387	0.134423	0.223734	0.587987	0.132573	0.161304	0.275266	0.35177	0.566283	0.802818	0.279911	0.479727	0.800662	0.147609	0.230503	0.264778	0.343867	0.54559	0.754572	0.147609
PC(18:1/22:5) (µmol/L)	0.743222	1.20611	1.72952	0.937188	1.35271	1.9528	0.567054	1.24821	1.74017	0.663425	1.14834	1.8241	0.738595	1.20904	1.72531	0.818955	1.31664	1.87366	0.654224	1.01738	1.79733	0.445219	0.487389	0.727165	0.740504	1.23445	2.2605	0.405523	0.798219	1.35835	0.701666	1.06574	1.888	0.433744	0.59868	1.2349	1.17766	2.4954	4.19939	0.766001	1.209	2.44966	0.757258	1.08889	1.35647	0.96119	1.67865	3.99508	0.757258
PC(18:1/22:6) (µmol/L)	0.795603	1.20111	1.76363	0.899851	1.41997	2.17048	0.627607	1.15018	1.61868	0.614662	1.02189	1.81167	0.785594	1.19653	1.74093	0.75936	1.38401	1.96545	0.892458	1.23273	1.83002	0.473413	0.835839	1.2315	0.943161	1.45635	1.88093	0.805444	1.21323	1.53992	0.933587	1.28954	1.84402	0.705825	1.04526	1.49628	1.05482	1.42278	2.29796	0.878646	1.12445	1.99674	0.834426	1.34151	2.27498	0.982574	1.28667	2.22895	0.834426
PC(18:2/16:1) (µmol/L)	3.48575	5.08891	8.08843	4.84512	6.07067	10.0691	3.02904	4.81941	6.63014	4.13452	6.06228	9.87784	3.35161	5.08362	7.68932	4.52481	6.07067	10.0621	3.63979	5.26654	9.29759	2.98534	3.66082	5.62211	2.89847	4.83147	7.05755	2.86762	4.49667	6.28911	3.28492	5.20124	8.16162	2.90182	3.80753	6.14018	6.8096	11.7646	14.2987	3.95575	5.37027	10.9323	3.40312	4.02184	6.21975	4.74331	7.63639	13.2688	3.40312
PC(18:2/18:2) (µmol/L)	8.81769	12.8247	18.9128	10.8771	15.7672	20.9062	8.29017	11.25	16.2627	7.3919	15.3595	26.6428	8.69904	12.6569	18.3901	9.84817	15.7672	21.4344	9.447	12.9588	19.2243	6.15661	10.3156	15.8458	6.58922	12.8919	17.1229	6.46592	10.9424	15.4107	7.93844	12.9588	18.1369	6.59155	10.9424	15.3627	15.9867	23.6201	27.3783	9.28169	9.85825	28.92	6.26735	10.9652	14.2102	9.33634	21.9509	27.0014	6.26735
PC(18:2/18:3) (µmol/L)	0.252201	0.36363	0.580654	0.315966	0.456237	0.657306	0.295141	0.435836	0.606081	0.32554	0.412469	0.491974	0.254345	0.386853	0.594957	0.327112	0.436138	0.602426	0.276597	0.406931	0.616365	0.273802	0.411893	0.486966	0.217844	0.298618	0.475963	0.302259	0.351563	0.562473	0.252413	0.371866	0.604518	0.288949	0.351563	0.489	0.366894	0.522898	0.779052	0.339946	0.477276	0.732024	0.277749	0.493067	0.553961	0.339946	0.489219	0.732024	0.277749
PC(18:2/20:1) (µmol/L)	0.514184	0.693241	1.02074	0.451066	0.72641	1.1164	0.590653	0.750465	1.47754	0.475893	0.631853	0.935628	0.518658	0.717901	1.08287	0.463569	0.70459	1.02162	0.548611	0.723897	0.99575	0.310136	0.392719	0.697941	0.507902	0.723653	1.15021	0.36802	0.588395	1.0195	0.530659	0.723897	1.04961	0.345643	0.505526	0.884162	0.824995	0.938968	1.19519	0.53815	0.68177	0.795886	0.485605	0.756209	1.02659	0.682124	0.851217	0.978069	0.485605
PC(18:2/20:2) (µmol/L)	0.19444	0.280768	0.482004	0.267368	0.344806	0.473942	0.162771	0.284965	0.502896	0.238712	0.330931	0.582517	0.191824	0.283979	0.485269	0.254168	0.344806	0.53287	0.209476	0.292773	0.514362	0.0935278	0.189921	0.499979	0.143944	0.250779	0.580682	0.171568	0.27698	0.563644	0.177742	0.285954	0.514362	0.159748	0.254874	0.470612	0.28824	0.664406	1.06833	0.207377	0.235322	0.986263	0.227803	0.304572	0.351563	0.213	0.36069	1.06611	0.227803
PC(18:2/20:3) (µmol/L)	0.540778	0.823812	1.19074	0.769963	1.00965	1.40208	0.42554	0.629316	1.09322	0.64306	0.902346	1.47557	0.519378	0.813298	1.16866	0.747868	0.987502	1.42588	0.561694	0.729943	1.05472	0.373134	0.517571	0.84593	0.455857	0.671151	1.01756	0.540683	0.723897	0.927138	0.529556	0.722894	1.03301	0.488476	0.699238	0.92298	0.596862	0.864862	1.09847	0.673658	0.910085	1.88052	0.42598	0.578687	0.860267	0.673658	0.903802	1.22495	0.42598
PC(18:2/20:4) (µmol/L)	1.1614	1.60648	2.33207	1.60267	2.06746	2.46462	1.16745	1.468	2.6815	0.911135	2.10355	3.03163	1.16623	1.59312	2.43658	1.40625	2.06746	2.56304	1.26475	1.63791	2.28446	0.863658	1.31931	1.93877	1.11456	1.63569	2.33099	1.11177	1.35084	1.68163	1.19322	1.63791	2.28763	1.07442	1.35084	1.71111	1.44088	2.21228	2.81465	1.26839	1.52303	2.77567	1.05253	1.2082	1.55063	1.30088	2.13559	2.63006	1.05253
PC(18:2/20:5) (µmol/L)	0.0888257	0.153399	0.289204	0.0607849	0.103368	0.132176	0.120942	0.157438	0.328301	0.0576872	0.123957	0.191231	0.0920688	0.153665	0.299547	0.0607007	0.11048	0.163216	0.11094	0.215514	0.386585	0.152087	0.346287	0.525965	0.120879	0.200553	0.488909	0.114455	0.177004	0.252413	0.120479	0.208462	0.393069	0.122125	0.194502	0.346287	0.130745	0.161979	0.292573	0.034918	0.0628892	0.0969314	0.0969145	0.158753	0.268847	0.0484884	0.139752	0.181198	0.0969145
PC(18:2/22:6) (µmol/L)	0.0616015	0.0947012	0.152736	0.0576665	0.0911797	0.143628	0.0851826	0.131566	0.194123	0.039074	0.068137	0.136835	0.0690534	0.101451	0.16164	0.0539533	0.0901741	0.142384	0.0938081	0.140618	0.189577	0.0839603	0.107203	0.149455	0.081591	0.125603	0.238778	0.0795969	0.10554	0.173843	0.0921326	0.137629	0.191426	0.0802085	0.10554	0.16212	0.0759488	0.106511	0.293573	0.0583296	0.0689873	0.121242	0.092005	0.106791	0.151339	0.0660952	0.0911389	0.217994	0.092005
TAG40:0 (µmol/L)	0.20356	0.373385	1.40616	0.108744	0.218935	0.556592	0.196582	0.379774	2.56941	0.137274	0.361653	1.3653	0.20315	0.373442	1.51167	0.115413	0.247603	0.666054	0.160343	0.369626	1.26501	0.461326	0.735449	1.41259	0.246264	0.622623	1.29089	0.257918	1.15348	2.17272	0.174944	0.462831	1.27971	0.3045	1.11916	2.11512	0.0689692	0.0996806	0.246433	0.131113	0.74379	1.34482	0.250412	0.585194	2.16599	0.0887849	0.131569	1.09426	0.250412
TAG42:0 (µmol/L)	0.208009	0.596932	1.36956	0.124572	0.206794	0.722497	0.176956	0.569153	2.6947	0.184348	0.523545	1.15129	0.203337	0.580909	1.48982	0.126491	0.239475	0.848916	0.191457	0.488479	1.30419	0.641738	1.16085	2.36288	0.341956	0.863999	1.60365	0.508996	1.31568	3.01057	0.21957	0.563707	1.35162	0.522574	1.31568	2.93333	0.0764804	0.134566	0.253679	0.18357	0.940096	1.16375	0.536954	0.93803	2.24589	0.114074	0.180608	1.02719	0.536954
TAG42:1 (µmol/L)	0.157032	0.465186	1.00398	0.088739	0.171758	0.596835	0.183412	0.517997	1.62891	0.148213	0.522732	0.908902	0.158463	0.472063	1.22536	0.093692	0.205006	0.671739	0.159074	0.492	1.17308	0.680014	0.906775	1.64909	0.214021	0.767017	1.13965	0.337128	0.895304	2.90292	0.179857	0.529567	1.14138	0.420867	0.895304	2.70556	0.0528573	0.0952029	0.170119	0.126191	0.508364	0.75638	0.397025	0.613318	1.43026	0.0622506	0.132858	0.551148	0.397025
TAG42:2 (µmol/L)	0.0187959	0.0516761	0.171299	0.00788394	0.0234428	0.0678706	0.0244728	0.0724578	0.213048	0.0175409	0.0400377	0.113759	0.0218729	0.0564957	0.180903	0.0105346	0.0256533	0.0845698	0.0218729	0.0574833	0.139302	0.0352034	0.081886	0.157378	0.0317014	0.0909379	0.174893	0.048304	0.068692	0.229615	0.024152	0.0602993	0.147961	0.047192	0.068692	0.220892	0.00517401	0.0100924	0.0391114	0.0182128	0.0623636	0.109169	0.0443564	0.0703301	0.138148	0.00773327	0.0188531	0.0739958	0.0443564
TAG44:0 (µmol/L)	0.768163	1.84891	4.15203	0.333441	0.884785	1.98339	0.844717	2.05319	6.60052	0.562069	1.78988	3.84201	0.785897	1.85306	4.96909	0.390726	1.10652	2.1385	0.654172	1.67869	3.78508	1.63071	3.71981	8.85269	1.02878	2.22943	4.79744	1.70768	4.09667	7.78975	0.675002	1.80811	4.0151	1.74633	4.09667	7.68668	0.174669	0.41722	0.782093	0.739812	2.1686	3.70448	2.04691	2.6904	6.42624	0.309222	0.755929	2.7498	2.04691
TAG44:1 (µmol/L)	0.716586	1.89021	4.20911	0.330105	0.871671	1.86788	0.965282	1.79792	6.90487	0.775303	1.70283	5.08734	0.786202	1.86392	4.89741	0.361365	1.23385	2.33783	0.758631	1.67335	4.38383	2.34607	3.31994	6.93948	1.19923	2.49687	7.5277	1.72889	3.10733	10.1968	0.811486	1.92183	4.84602	1.73675	3.20634	10.0767	0.160865	0.5022	0.893521	0.737328	2.16277	3.88984	2.60105	3.11641	9.20881	0.299845	0.875278	2.93381	2.60105
TAG44:2 (µmol/L)	0.236002	0.559924	1.13984	0.136858	0.330083	0.549679	0.286117	0.617327	1.62782	0.266339	0.576711	1.22909	0.241177	0.563421	1.245	0.15132	0.352241	0.779009	0.243641	0.476521	1.21355	0.502169	0.773837	1.48966	0.378608	0.754145	1.55905	0.42383	0.849091	2.74277	0.263572	0.523335	1.31919	0.425752	0.849091	1.97689	0.100544	0.194887	0.30598	0.278457	0.554311	0.964212	0.542215	0.842071	1.43696	0.120085	0.287292	0.734859	0.542215
TAG44:3 (µmol/L)	0.0165765	0.0374091	0.0929099	0.0134513	0.0203516	0.0496276	0.0173363	0.0520588	0.0976048	0.0184391	0.0367571	0.078182	0.0165765	0.0407314	0.0934466	0.0142222	0.0240351	0.0590993	0.0180768	0.0378198	0.0881611	0.0252302	0.047329	0.126144	0.0163949	0.0662602	0.119519	0.027917	0.0617373	0.115366	0.0171849	0.0422263	0.100362	0.0282697	0.0531895	0.114493	0.016242	0.0248191	0.0507087	0.0173071	0.03908	0.0601354	0.0295497	0.0519147	0.118527	0.0176693	0.0278587	0.0569516	0.0295497
TAG46:0 (µmol/L)	1.59656	3.28147	7.59231	0.879765	2.01668	3.83498	2.00569	4.63464	10.0742	1.85773	2.65523	10.1301	1.61675	3.49589	7.84903	1.08117	2.39754	4.40404	1.53908	2.96626	6.76258	3.22233	5.89774	12.829	2.19776	3.76017	8.18509	3.95707	8.34971	11.6296	1.71205	3.35397	7.12402	3.81066	7.66165	11.3615	0.558367	1.12655	1.88405	1.61642	4.08897	7.57823	4.35911	7.564	14.6475	0.810773	1.57102	5.33679	4.35911
TAG46:1 (µmol/L)	2.77295	6.78234	16.8264	1.48601	3.19914	9.40811	3.8879	8.61248	17.1859	3.55081	6.35157	21.8446	2.97268	6.81719	16.9926	1.80671	4.20088	10.3657	3.02205	6.40805	13.3442	6.762	10.1982	23.5298	5.00279	7.86126	27.818	8.3439	17.33	33.5599	3.09808	6.67883	15.4697	7.39222	14.5917	31.3533	0.952994	2.30182	4.20406	3.06171	9.28874	21.4827	10.7422	17.5177	22.9278	1.87386	3.38783	10.865	10.7422
TAG46:2 (µmol/L)	1.1045	2.22438	5.17979	0.639327	1.37675	3.10094	1.19173	2.43072	4.26129	1.31481	1.82343	4.73235	1.13733	2.23845	4.96927	0.812412	1.5922	3.24677	1.1859	1.93118	4.4529	1.86321	2.86054	7.66288	1.69108	2.75816	6.43919	2.20317	4.13532	8.10184	1.25137	2.11468	4.65144	2.18708	3.92848	7.04852	0.477214	1.10054	1.58607	1.4654	2.80879	5.07991	2.63577	4.45046	6.63559	0.888137	1.56305	3.15752	2.63577
TAG46:3 (µmol/L)	0.370696	0.728167	1.44523	0.282317	0.481222	0.785618	0.466099	0.685946	1.47644	0.420973	0.582871	1.36051	0.376583	0.725363	1.43256	0.308038	0.506043	0.970857	0.355408	0.66119	1.38854	0.512876	0.838837	2.68335	0.418022	1.15086	2.2713	0.689009	1.01361	2.85853	0.358823	0.711083	1.55597	0.640018	0.886486	2.67742	0.244562	0.284261	0.641646	0.436583	0.667632	1.10583	0.681813	1.23361	1.96995	0.270272	0.487458	0.736302	0.681813
TAG46:4 (µmol/L)	0.028371	0.0608275	0.12352	0.0239519	0.0384276	0.0766691	0.0312703	0.0859288	0.113896	0.0310842	0.0535366	0.0991986	0.0297758	0.0631657	0.122367	0.0255645	0.0465939	0.07847	0.0317365	0.0569281	0.109749	0.0226079	0.0482472	0.160084	0.0527398	0.0942115	0.150255	0.0407032	0.0889591	0.155748	0.0330842	0.0657113	0.123304	0.0321354	0.0826573	0.148155	0.030873	0.0397978	0.099553	0.0379963	0.0567329	0.070516	0.0537454	0.110054	0.143815	0.0376747	0.0457285	0.0728747	0.0537454
TAG48:0 (µmol/L)	4.20859	9.00126	13.7459	3.20641	5.28359	10.6632	4.94014	9.71406	16.914	5.00672	9.35811	16.6818	4.28848	9.19054	14.124	3.66964	6.1261	12.041	4.18457	7.32323	12.87	6.24339	10.204	20.0828	5.36515	9.01515	19.6139	11.6139	15.9419	23.8676	4.58329	8.12595	14.898	10.204	15.7776	23.1125	2.29077	4.24371	4.87421	6.42937	9.1882	13.8775	12.3062	14.9163	24.1512	2.798	4.85529	10.3201	12.3062
TAG48:1 (µmol/L)	15.6712	39.107	72.2216	10.1867	19.0825	49.5877	14.8424	34.3745	68.1551	23.5343	33.0869	96.444	15.7846	38.9922	71.1108	11.8245	27.0266	68.4275	17.3441	34.6568	58.5563	32.4655	53.8525	107.259	28.2472	46.5577	99.696	42.7418	96.1934	118.875	18.288	37.229	70.263	42.6917	82.5283	117.964	6.68494	14.7332	36.2328	17.4749	54.4979	99.0356	62.0652	96.2147	99.6036	10.5762	18.6498	61.8144	62.0652
TAG48:2 (µmol/L)	8.50671	16.8866	29.5023	5.66848	11.3195	23.4659	7.09505	15.3122	23.4528	9.96091	15.9554	35.6675	8.37633	16.1742	27.4768	6.42333	12.2948	25.2161	8.03728	13.3278	22.6978	10.5086	14.5953	38.2163	9.18801	22.5527	38.3269	14.7352	32.7517	44.5508	8.18097	14.6175	27.4892	13.7213	30.5495	44.2031	4.02931	8.75087	17.5851	8.302	25.4162	42.1743	19.1104	26.291	48.1136	7.14353	10.5724	24.08	19.1104
TAG48:3 (µmol/L)	2.97027	5.88275	10.806	2.14478	4.23847	7.58587	2.64265	5.86531	9.04454	3.54972	5.49091	11.5373	2.96907	5.86531	10.6766	2.61926	4.43885	8.2352	2.98882	5.21691	8.56268	3.14323	4.4451	12.4911	3.01585	9.42071	12.9797	4.48473	10.1512	15.9328	2.98882	5.56895	9.85143	4.19507	9.03647	15.3979	2.5827	3.42788	5.85225	3.32848	7.48156	12.4855	5.13328	9.02382	22.6013	3.16887	4.11741	6.90695	5.13328
TAG48:4 (µmol/L)	0.456343	0.764237	1.44312	0.354029	0.580158	1.01835	0.462265	0.768003	1.37708	0.469428	0.684977	1.33868	0.459629	0.768003	1.41708	0.390589	0.650774	1.14324	0.445862	0.740584	1.39644	0.499521	0.583048	1.86772	0.425549	1.18119	2.01486	0.787582	1.16735	2.23364	0.445862	0.795231	1.51936	0.583048	1.10897	2.1893	0.377299	0.514182	0.796037	0.641012	0.918967	1.40311	0.788248	1.268	2.58225	0.486033	0.727078	1.05013	0.788248
TAG48:5 (µmol/L)	0.04754	0.0897062	0.167471	0.0414243	0.0725685	0.107021	0.0455274	0.100062	0.140543	0.03414	0.0569883	0.131535	0.0472342	0.0902742	0.156817	0.0399152	0.0721641	0.109179	0.0473625	0.0812017	0.124122	0.0395144	0.0433908	0.254904	0.0451206	0.114498	0.20839	0.0368991	0.109965	0.193272	0.0466078	0.0905585	0.155184	0.0398949	0.093705	0.217375	0.0477988	0.079059	0.129063	0.0666203	0.0947137	0.146156	0.0371959	0.108889	0.333651	0.0563419	0.0890834	0.124108	0.0371959
TAG50:0 (µmol/L)	8.07012	13.5939	19.9236	6.87515	11.0782	14.8721	8.51344	17.5964	28.3057	9.06039	15.1345	23.9709	8.13416	13.8124	20.4242	7.02052	11.6941	17.7462	8.62722	13.2638	19.9351	11.8802	18.0777	28.021	10.1771	16.0754	23.8435	16.7218	23.2148	40.4922	8.77009	13.3778	20.7391	15.5746	21.4905	39.0064	5.56676	6.61817	10.238	12.0929	16.7588	24.7432	18.6444	26.0392	40.9616	5.7861	9.79557	19.6928	18.6444
TAG50:1 (µmol/L)	40.5614	66.9687	105.848	26.4777	53.8444	81.4974	36.1889	71.0138	112.595	45.9757	71.9014	133.245	40.2146	67.6835	105.83	30.9104	56.0805	101.773	37.1018	66.3461	99.2777	58.495	84.5481	159.995	47.5737	78.3653	116.636	86.2357	127.126	182.723	39.2729	70.56	105.988	79.5166	114.18	182.44	20.4056	35.0299	67.7391	46.8558	103.72	123.275	99.1082	158.297	200.53	26.0463	47.6193	105.784	99.1082
TAG50:2 (µmol/L)	59.2251	95.7709	173.223	45.6343	79.2592	126.179	50.0234	87.1303	161.5	83.4472	120.06	223.994	55.7788	95.0602	173.107	50.7587	95.2498	143.527	54.8607	91.3208	139.035	75.8504	88.6567	177.491	68.2032	140.462	209.313	101.855	210.037	276.938	57.3054	98.6771	151.852	92.1791	194.857	276.935	39.2442	62.6228	109.147	57.8222	161.803	230.145	137.629	241.039	280.92	43.7672	69.1861	152.144	137.629
TAG50:3 (µmol/L)	37.9145	61.9128	104.295	26.8194	53.5834	87.8199	26.6822	54.429	92.7244	45.4331	72.7305	134.656	36.2987	61.1426	102.89	28.0501	57.4127	94.1043	34.3125	58.6501	86.269	27.829	47.2444	105.615	40.9359	84.8717	124.665	59.0437	108.825	153.662	36.5239	62.9118	97.9105	51.7779	106.603	152.506	39.5778	51.8578	64.6123	41.2149	84.1872	164.957	59.0895	118.198	201.846	41.2149	58.6664	77.8873	59.0895
TAG50:4 (µmol/L)	4.6283	6.80869	11.3975	3.29338	6.20818	10.2917	3.06308	7.69901	10.5817	5.06383	6.99724	12.6613	4.46399	7.18716	11.2401	3.6669	6.72129	10.3496	3.93954	6.69939	10.0773	3.18776	5.09484	11.7754	3.93041	9.44373	13.4731	6.10207	11.2312	17.1362	3.93844	7.20741	11.3889	5.22942	10.4537	17.0347	4.64994	6.73269	9.19193	4.31824	8.10814	18.4792	5.79181	12.1795	27.4539	4.31957	6.73269	9.8218	5.79181
TAG50:5 (µmol/L)	0.697518	1.07712	1.66382	0.513111	0.868387	1.16064	0.541736	0.998777	2.02939	0.602348	1.05247	1.8284	0.640384	1.07423	1.80947	0.54702	0.919241	1.31694	0.581951	1.08861	1.61953	0.582109	0.84595	2.02957	0.669574	1.34209	2.12109	0.856645	1.56985	3.02456	0.638396	1.17121	1.72955	0.682433	1.52027	2.74161	0.746199	0.969467	1.43897	0.741819	1.24301	1.60535	0.752101	1.63035	3.78666	0.751278	1.03586	1.47707	0.752101
TAG50:6 (µmol/L)	0.0133744	0.0225112	0.0423466	0.0134784	0.0234915	0.036619	0.00943204	0.0236058	0.0334141	0.0170844	0.0225346	0.049098	0.0130057	0.0225346	0.0397827	0.0142715	0.0229922	0.0375325	0.0145311	0.0246082	0.0382681	0.0158875	0.0191833	0.0537577	0.0142962	0.0293963	0.0492124	0.0188184	0.0375325	0.0561444	0.0145311	0.0256888	0.0435642	0.0180494	0.0336858	0.0538324	0.00991711	0.0198894	0.0399644	0.0164963	0.026193	0.0575196	0.0166687	0.0659395	0.109597	0.0164963	0.022572	0.0421078	0.0166687
TAG52:0 (µmol/L)	4.13714	6.44072	10.2922	3.56905	5.09677	7.88945	4.10549	7.34161	12.1088	4.62794	7.64173	10.2023	4.1378	6.52915	10.5683	3.91749	5.60782	8.60233	3.73726	6.19054	9.53703	5.82661	8.90154	15.7302	4.83609	8.87235	13.1493	9.05744	12.1658	22.2566	4.08217	6.76585	10.031	8.438	11.2908	19.8115	2.35693	3.21967	4.33936	5.01589	6.90194	12.8431	10.4738	14.4121	26.5545	2.43575	4.22227	8.0404	10.4738
TAG52:1 (µmol/L)	46.5157	76.1957	134.869	38.1994	63.0444	99.362	48.2162	72.5465	137.981	60.1828	90.2046	127.185	46.5552	74.7999	134.698	40.616	67.3842	104.614	45.527	80.4919	126.165	74.2162	93.8165	168.759	50.4243	96.8793	174.504	111.85	159.176	256.286	48.3132	92.8494	139.689	98.7158	155.229	254.152	33.7757	43.9186	77.6971	31.3926	108.009	187.389	136.139	186.756	303.918	33.6729	50.2316	120.963	136.139
TAG52:2 (µmol/L)	226.866	365.961	607.279	167.712	330.591	492.007	158.563	380.161	670.267	294.859	429.441	692.732	208.391	368.589	617.382	195.561	357.012	550.705	217.542	335.152	574.843	237.929	409.325	710.284	253.905	393.044	731.812	525.39	717.408	900.516	227.058	348.064	603.78	452.508	636.174	859.68	167.396	223.899	556.732	220.85	608.773	819.34	603.204	662.939	1009.25	179.935	255.34	663.579	603.204
TAG52:3 (µmol/L)	157.248	254.191	364.528	163.215	256.684	340.276	145.385	204.869	326.264	202.374	329.028	437.751	158.081	248.455	357.362	174.428	269.863	370.224	154.809	220.177	311.385	96.8608	163.794	492.883	151.322	301.896	453.301	253.663	357.914	572.229	154.809	229.842	332.916	205.981	320.354	571.053	161.426	250.681	273.851	189.596	347.678	703.265	202.628	449.431	971.34	189.596	262.075	438.429	202.628
TAG52:4 (µmol/L)	54.1198	95.1311	130.867	59.7822	85.6558	122.256	48.7913	74.9335	123.528	69.7295	91.4336	156.326	54.2779	93.1822	128.605	60.4191	90.1236	137.575	50.6952	78.329	108.975	28.6129	54.6583	107.387	45.8394	99.2432	170.621	77.5272	116.861	167.567	49.1742	79.7435	122.532	56.5056	111.598	166.298	80.5049	103.983	129.636	70.4988	106.243	269.136	55.7846	186.098	332.652	73.9668	103.983	133.432	55.7846
TAG52:5 (µmol/L)	11.8022	20.2135	31.3776	14.1295	19.3787	27.455	11.7017	18.0957	33.808	13.8847	17.5635	31.9222	11.8648	19.0643	31.3364	13.9947	19.3787	30.0863	11.5676	18.6891	27.0103	7.54289	10.6306	21.8547	11.074	21.5781	35.2859	15.4863	28.3953	41.3103	11.5676	19.4283	27.7348	12.4505	24.8186	40.6702	17.2564	26.1727	36.4483	14.9849	21.0899	46.2041	13.2939	34.868	52.6045	15.6256	24.8303	39.5802	13.2939
TAG52:6 (µmol/L)	1.96548	2.96246	4.9266	1.57658	2.38211	3.68277	1.70817	3.04952	6.91166	1.55175	2.67736	4.52539	1.91249	2.99436	4.98184	1.56497	2.42066	4.00033	1.91889	2.96571	4.86007	1.81854	2.47852	4.68767	2.11503	3.65796	5.62552	2.4904	4.66886	7.58544	1.96002	3.24296	5.00087	1.98814	4.42929	7.50887	2.03927	3.26935	4.81702	1.78886	3.39092	5.02449	2.33667	5.77885	12.3648	1.89755	3.26935	4.88899	2.33667
TAG52:7 (µmol/L)	0.310241	0.547146	0.905116	0.22392	0.380217	0.589734	0.283933	0.593492	1.26459	0.333407	0.562387	0.896956	0.306466	0.548564	0.907076	0.23618	0.406317	0.636537	0.318567	0.518411	0.900311	0.313404	0.836524	1.45146	0.491681	0.722156	1.37634	0.629774	1.14151	1.96602	0.33555	0.579169	0.949715	0.600128	1.02656	1.8594	0.190477	0.294394	0.566054	0.287514	0.648709	0.952744	0.887538	1.0783	2.12951	0.252375	0.343869	0.751215	0.887538
TAG52:8 (µmol/L)	0.099758	0.152988	0.233176	0.0827153	0.122926	0.175467	0.0991554	0.158668	0.264115	0.110185	0.185409	0.326284	0.0998777	0.153407	0.234522	0.0834023	0.136709	0.197552	0.0967069	0.150669	0.207509	0.093033	0.175436	0.332838	0.0840305	0.201122	0.275945	0.192018	0.272487	0.396512	0.0966222	0.154949	0.245501	0.171551	0.254939	0.346971	0.0739843	0.107398	0.160284	0.0852387	0.24269	0.357748	0.223909	0.274181	0.459076	0.0743814	0.140141	0.248207	0.223909
TAG54:0 (µmol/L)	0.646517	0.987108	1.62072	0.503623	0.766736	1.16283	0.601459	1.22078	1.47798	0.702197	1.10087	1.57428	0.648343	0.9985	1.58299	0.519106	0.902394	1.28328	0.654663	0.982055	1.64942	0.71266	1.24472	2.24868	0.711328	1.16738	2.01141	1.35754	1.65918	3.19893	0.669526	1.04764	1.70282	1.27948	1.51053	3.001	0.344099	0.455603	0.624718	0.861812	1.13262	1.80505	1.25846	2.12214	7.0274	0.380107	0.61639	1.3341	1.25846
TAG54:1 (µmol/L)	6.34487	10.3692	19.5687	4.59453	7.90567	14.2749	5.62499	11.0424	16.5962	6.0965	11.3049	19.6925	6.30314	10.5017	19.1614	4.93928	9.53434	15.0528	5.97923	11.4423	18.2523	8.99636	14.7872	28.5595	5.49402	12.1673	22.375	13.1326	18.8354	48.3466	5.97923	11.7293	19.7063	11.1383	18.8354	44.6602	4.12715	6.09392	11.0759	4.33094	14.8525	25.2628	14.2858	30.5724	103.823	4.15108	7.95	15.7332	14.2858
TAG54:2 (µmol/L)	33.4294	47.5034	69.2749	25.752	39.352	64.2911	29.9161	44.1049	71.4762	37.6363	52.3776	66.9107	32.9704	47.3361	69.1084	27.9422	43.5445	65.8051	30.7749	49.3904	71.4958	28.0873	57.7917	83.6831	29.6059	58.2454	98.5955	61.54	77.5173	160.405	30.7749	50.1385	78.3707	54.9181	65.6436	125.681	25.3735	36.2935	54.8277	24.5487	67.6813	113.591	71.6819	122.34	292.596	25.9558	42.3862	81.9948	71.6819
TAG54:3 (µmol/L)	83.8538	116.037	149.239	64.8858	96.9386	142.015	84.1509	107.832	162.086	81.2176	127.772	154.396	84.4773	115.094	150.27	67.495	109.645	143.356	76.5281	111.745	160.671	51.2083	97.4791	202.845	72.4097	126.629	194.116	123.006	163.532	227.874	75.2934	115.682	166.283	115.882	156.543	210.467	80.2771	109.937	132.604	79.5237	147.253	188.484	131.806	208.416	451.276	82.5598	117.714	161.083	131.806
TAG54:4 (µmol/L)	71.4927	102.046	148.405	72.0118	96.3216	128.249	66.7696	89.3114	146.231	79.9788	96.6532	137.998	70.991	100.989	147.845	73.0732	96.3216	131.346	60.9907	102.881	144.388	36.4473	64.1136	144.295	67.5319	111.056	156.183	86.3516	122.379	179.285	63.2124	104.143	148.096	64.743	120.716	168.892	85.8498	114.602	196.078	91.4179	127.688	187.661	76.4879	197.749	335.42	91.4179	114.602	187.661	76.4879
TAG54:5 (µmol/L)	36.3932	53.9685	84.8583	36.4839	52.6556	77.2967	32.1216	61.2959	88.4374	42.4777	54.4489	81.1022	36.2052	56.2104	84.6876	37.2348	53.4634	77.8271	37.4264	54.4548	82.8277	21.5062	29.5736	71.665	34.4115	68.6384	92.5678	52.4742	69.3661	93.5823	36.3005	57.7582	86.7163	35.7902	68.3246	88.5723	42.4775	62.8073	111.34	46.1146	70.2391	125.23	40.3581	112.99	244.329	46.1146	63.3586	118.488	40.3581
TAG54:6 (µmol/L)	14.2681	20.4718	30.8482	11.1414	18.2382	25.9182	12.8185	19.6804	34.4923	12.4505	17.65	32.2386	14.4564	20.4609	31.4519	12.3114	18.1637	26.1569	14.2642	20.37	29.5301	10.6821	15.3262	25.3147	15.5838	21.1121	31.8012	17.023	28.5981	43.564	14.4588	20.5575	30.1068	15.1787	25.3684	41.0885	16.0701	20.568	37.7955	15.3156	22.2367	36.7933	14.1654	42.8261	56.2563	15.6651	20.568	36.7933	14.1654
TAG54:7 (µmol/L)	2.75842	4.547	6.68415	2.35092	3.58371	5.05367	3.34081	4.70055	7.68341	2.11036	3.37041	6.46074	2.76609	4.55295	6.90673	2.33264	3.39935	5.48259	2.88947	4.29763	7.35397	2.29708	3.65747	6.81623	3.12554	5.68442	7.58183	3.46075	5.47402	10.9865	2.9494	4.48604	7.37244	3.08633	5.33593	9.63213	3.24534	4.70231	11.3174	2.51434	4.35762	6.30523	3.34955	8.34228	14.1625	2.79377	4.70231	6.77618	3.34955
TAG54:8 (µmol/L)	0.365128	0.634552	1.03068	0.333925	0.477144	0.776203	0.437354	0.708891	1.37833	0.290985	0.41473	0.986852	0.373706	0.647125	1.0607	0.32729	0.454864	0.885305	0.357338	0.647044	1.18297	0.403723	0.629784	1.08434	0.497046	0.811001	1.73426	0.479708	0.878625	1.80035	0.393677	0.71077	1.36387	0.463522	0.830311	1.51105	0.518583	0.746556	1.74447	0.298059	0.607646	0.84302	0.513611	1.11799	2.70836	0.461183	0.708546	0.858937	0.513611
TAG56:10 (µmol/L)	0.0666286	0.118938	0.16994	0.0774446	0.0979565	0.139112	0.0587967	0.099049	0.153666	0.0729113	0.108792	0.151446	0.0658481	0.115526	0.168788	0.0745466	0.100293	0.14899	0.0630782	0.10127	0.146227	0.0408645	0.102372	0.153743	0.0596534	0.1165	0.169732	0.0887743	0.13372	0.244904	0.0622961	0.105279	0.149714	0.0809947	0.131788	0.206226	0.0785724	0.124259	0.169668	0.0739071	0.175019	0.236886	0.109218	0.220719	0.463386	0.0829628	0.13433	0.200167	0.109218
TAG56:1 (µmol/L)	0.254906	0.427208	0.68255	0.194359	0.319721	0.520127	0.310562	0.45938	0.858708	0.184216	0.437576	0.612102	0.261064	0.432906	0.713482	0.193131	0.346114	0.575787	0.243043	0.47501	0.738175	0.353993	0.471134	1.08284	0.285616	0.541793	0.754091	0.585104	0.872956	1.82896	0.254313	0.506223	0.738175	0.478178	0.696225	1.62296	0.0976761	0.264789	0.525367	0.182407	0.586217	0.907381	0.547851	1.29658	4.33923	0.155759	0.345843	0.627109	0.547851
TAG56:2 (µmol/L)	0.977307	1.73295	2.81478	0.636284	1.35016	1.93265	0.873063	1.79618	3.39266	0.925004	1.62271	2.40591	0.958407	1.74289	2.96827	0.850326	1.37062	2.30601	1.03603	1.88065	2.72325	1.03019	2.25475	3.91179	1.06766	1.90011	3.61192	2.07328	3.21708	4.9798	1.04779	1.88803	2.72425	1.938	2.87313	4.95117	0.577187	1.35672	2.22109	0.757013	2.41475	3.79267	2.37854	6.06225	16.8917	0.593717	2.01131	2.88313	2.37854
TAG56:3 (µmol/L)	2.88049	4.18038	6.25641	2.20365	3.47297	5.15609	2.49512	4.11672	5.9455	2.90114	4.15822	5.48651	2.84622	4.15023	6.04603	2.38307	3.55422	5.17796	2.84881	4.23232	5.65982	1.87321	4.04725	8.19637	2.39176	4.49158	7.47708	4.32515	6.23278	9.53461	2.76403	4.24527	5.95587	4.04725	6.06394	9.08909	2.4521	4.4516	6.25598	3.33117	6.4811	10.103	6.32277	11.6262	31.1636	2.48655	5.42065	7.01247	6.32277
TAG56:4 (µmol/L)	4.3634	6.32086	8.95049	3.58674	5.1113	8.22231	3.65336	6.13703	8.36304	4.54728	6.03422	8.27579	4.29408	6.24844	8.79785	3.89608	5.4648	8.18286	3.89339	6.4664	8.81528	3.70311	4.86431	9.82175	3.87396	7.38727	10.4813	7.17581	8.76322	14.1852	3.89339	6.51544	9.375	5.15125	8.20746	13.2507	3.97504	5.67348	8.61778	4.70605	8.85614	12.7246	6.47063	13.0714	33.6903	4.3702	6.62681	9.48856	6.47063
TAG56:5 (µmol/L)	8.15393	11.7785	16.2949	6.53757	10.8347	13.6089	6.91116	11.7354	16.3281	8.08847	12.1582	16.6983	8.13538	11.7354	16.286	7.37082	11.2025	14.0503	7.93182	11.6387	16.0307	6.8952	8.87951	18.7842	7.44109	14.3725	19.9012	12.1163	18.6651	26.909	7.93182	12.0325	16.7445	10.0067	16.7753	24.6422	7.12134	11.2616	17.1174	7.64188	15.5823	23.2974	12.6541	18.4389	38.9205	7.83411	12.0629	19.1125	12.6541
TAG56:6 (µmol/L)	11.2625	16.5954	22.822	9.15132	12.1334	16.5171	10.4099	15.2366	23.8489	9.56066	17.7894	20.2016	11.2475	16.5446	23.1853	9.24647	13.6789	18.2925	11.9313	17.2229	22.9912	9.69352	12.8365	26.8776	11.4677	20.8923	26.5328	17.543	27.6439	38.9529	11.9313	17.4607	23.581	13.4679	23.4765	36.1171	9.25308	16.4324	17.8273	9.45901	16.2455	27.9066	14.1164	32.9962	47.196	9.62662	16.4324	21.2449	14.1164
TAG56:7 (µmol/L)	10.5209	16.4596	25.0478	7.63843	11.0044	16.699	10.7045	15.3679	29.8767	6.92917	12.9412	23.1985	10.558	16.4034	25.1712	7.58952	11.3421	17.6622	11.6107	17.3645	29.1592	12.0188	17.4391	32.7012	13.2204	22.5224	31.239	19.0173	24.6253	38.9125	11.9933	18.134	29.3566	15.6915	23.5432	38.1339	10.508	17.1245	19.7907	7.82823	12.0118	21.8328	15.0721	38.5748	73.8252	9.18573	15.3393	20.55	15.0721
TAG56:8 (µmol/L)	3.58152	5.66747	9.52337	2.65484	3.96292	7.29272	4.25558	6.53988	11.1996	2.1297	3.95735	8.83737	3.64615	5.83888	9.46115	2.46227	3.96292	7.48559	3.7469	6.02344	11.2262	3.71955	4.71365	11.7451	4.59312	7.33557	13.5683	5.73737	7.69791	14.9032	3.98413	6.36191	12.1707	4.71365	7.3674	12.8241	4.57721	6.00662	11.0055	2.86138	5.02454	7.22793	6.0573	14.9455	36.0023	3.55855	5.78438	8.0868	6.0573
TAG56:9 (µmol/L)	0.397551	0.65201	1.12252	0.299693	0.49512	0.82811	0.530476	0.761596	1.53471	0.268425	0.509253	0.990573	0.430092	0.670488	1.13596	0.298339	0.49512	0.847449	0.451825	0.76665	1.5387	0.50401	0.591213	1.51845	0.499544	0.734907	1.68254	0.602107	0.866556	1.84751	0.456112	0.763101	1.58801	0.559426	0.840746	1.81664	0.599847	1.10667	1.29917	0.291593	0.529565	0.86111	0.448993	1.41699	3.44653	0.4173	0.700329	1.28372	0.448993
TAG58:10 (µmol/L)	0.358575	0.610523	1.22085	0.251938	0.465207	0.841412	0.533666	0.760348	1.53006	0.260836	0.443747	0.959311	0.399931	0.643381	1.35827	0.263518	0.450667	0.881138	0.440443	0.789773	1.50836	0.526977	0.598982	1.27892	0.465352	0.747916	1.90625	0.548168	0.835382	1.59423	0.440443	0.757886	1.55751	0.55671	0.827171	1.53997	0.425132	0.908419	1.5522	0.374071	0.524386	0.854897	0.605462	1.73505	3.34127	0.382376	0.650444	1.21844	0.605462
TAG58:2 (µmol/L)	0.140417	0.217605	0.349455	0.105316	0.176934	0.306397	0.146439	0.22567	0.461444	0.108745	0.226919	0.319739	0.142822	0.217832	0.362307	0.105791	0.188454	0.315188	0.128006	0.235253	0.40677	0.144289	0.173338	0.720341	0.147134	0.236645	0.476118	0.24103	0.411592	0.670489	0.13634	0.235253	0.40677	0.212653	0.378742	0.675876	0.0588795	0.124312	0.559194	0.107993	0.326485	0.456573	0.229615	0.579663	2.11153	0.0930054	0.157594	0.456573	0.229615
TAG58:3 (µmol/L)	0.167884	0.235335	0.468717	0.116136	0.224889	0.330748	0.163791	0.26321	0.601823	0.109052	0.239262	0.406498	0.167971	0.237877	0.495269	0.114728	0.227397	0.333622	0.153178	0.277063	0.449467	0.163428	0.269226	0.699217	0.156646	0.288232	0.510562	0.274768	0.530817	0.937107	0.153178	0.282297	0.449467	0.258516	0.5099	0.892891	0.0933029	0.227935	0.647252	0.18553	0.447326	0.708433	0.33478	1.10672	2.51801	0.100156	0.369384	0.698405	0.33478
TAG58:5 (µmol/L)	0.138317	0.20651	0.319812	0.123229	0.20003	0.283004	0.118044	0.209393	0.304352	0.126567	0.195786	0.31151	0.137384	0.206653	0.315844	0.12774	0.20003	0.291241	0.143616	0.216177	0.290636	0.12554	0.156787	0.339507	0.137213	0.280682	0.385967	0.250223	0.318703	0.544229	0.143218	0.224422	0.32092	0.206967	0.273059	0.484136	0.120711	0.170112	0.357258	0.163997	0.303439	0.497273	0.259766	0.453849	0.871327	0.145957	0.208493	0.404489	0.259766
TAG58:6 (µmol/L)	0.980348	1.33616	2.03624	0.792541	1.09044	1.55965	0.7257	1.4811	2.13584	0.800619	1.55318	1.70808	0.973573	1.3675	2.05052	0.796285	1.11443	1.64807	1.01143	1.4114	2.03022	1.00034	1.19128	2.43248	0.966697	1.63122	2.45712	1.44291	1.94923	2.64328	1.01143	1.44096	2.15277	1.28423	1.92507	2.57921	0.754497	1.06593	1.97256	0.802604	1.60664	2.31372	1.34748	3.19584	4.82063	0.816211	1.16442	2.02465	1.34748
TAG58:7 (µmol/L)	1.65509	2.46148	3.7057	1.33364	1.73049	2.24876	1.8201	2.48312	3.46957	1.18214	2.33589	2.85455	1.66755	2.48312	3.64753	1.27538	1.81384	2.47123	1.82456	2.52934	4.2196	2.11211	2.78638	5.28305	1.93394	3.25891	4.46996	2.28604	3.47873	6.24896	1.84312	2.62854	4.39711	2.23474	3.47044	5.46623	1.3913	2.03443	3.91097	1.34334	2.1106	3.58375	1.93152	6.7391	9.51394	1.42847	2.03443	3.58375	1.93152
TAG58:8 (µmol/L)	1.5079	2.33327	3.98493	1.11689	1.53844	2.49227	1.85317	2.32474	4.9185	1.12419	1.75355	3.31215	1.51069	2.32474	4.07145	1.14277	1.57991	2.53722	1.74069	2.57395	4.07256	2.24236	2.48464	3.88098	2.13048	3.03529	5.92287	2.25885	2.86698	5.57619	1.863	2.74045	4.70174	2.26971	2.86018	4.24435	1.46016	2.34133	4.11909	1.29153	1.94768	2.6987	2.17476	6.23232	12.1	1.34442	2.19628	2.8335	2.17476
TAG58:9 (µmol/L)	0.949302	1.48222	2.84129	0.675336	0.963295	1.75115	1.3103	1.61433	4.14645	0.660468	1.05712	2.28381	0.980898	1.49701	2.86144	0.673409	0.994629	1.83077	1.18479	1.70629	3.22703	1.26806	1.55621	2.51654	1.28827	2.09814	4.53636	1.54569	2.23836	3.9922	1.20017	2.00056	3.51518	1.43106	2.13115	3.05061	0.976099	1.6219	2.73532	0.80541	1.2817	1.58094	1.80032	5.07351	9.01089	0.860572	1.54138	1.9556	1.80032
TAG60:10 (µmol/L)	0.0685668	0.119455	0.247196	0.0460149	0.0641296	0.126965	0.0709394	0.153055	0.308522	0.045856	0.0815271	0.167166	0.0698818	0.122572	0.261583	0.0460318	0.0664996	0.140036	0.0830801	0.159127	0.30793	0.0798208	0.216136	0.317601	0.100203	0.164175	0.367397	0.134985	0.211821	0.373807	0.0842956	0.15959	0.312369	0.1156	0.211821	0.334802	0.0587919	0.106144	0.172377	0.0374148	0.0724214	0.107047	0.121246	0.342551	0.755753	0.0482346	0.0928131	0.136517	0.121246
TAG60:11 (µmol/L)	0.0486116	0.103357	0.209588	0.0286619	0.0512144	0.117325	0.0696115	0.112418	0.343004	0.0233438	0.0631538	0.106687	0.0490646	0.107432	0.220336	0.0276395	0.0579792	0.109547	0.0603641	0.117048	0.309147	0.0794202	0.206123	0.303096	0.0607033	0.13622	0.309063	0.0746774	0.191908	0.316454	0.0603641	0.122784	0.309147	0.0813127	0.191908	0.301196	0.0373693	0.0978989	0.225647	0.0213792	0.06059	0.115272	0.0844061	0.28987	0.680489	0.0244437	0.0834379	0.162922	0.0844061
TAG60:12 (µmol/L)	0.0215449	0.0535999	0.145954	0.0110285	0.0243031	0.0538625	0.0324488	0.0923519	0.326572	0.00469157	0.021711	0.0731385	0.0239685	0.0541943	0.151174	0.00972077	0.0234915	0.0606767	0.0292643	0.0658938	0.338514	0.0767257	0.142527	0.228748	0.0414295	0.10446	0.273892	0.0469505	0.117301	0.187282	0.0322688	0.0815193	0.296537	0.0606629	0.117301	0.199285	0.00859225	0.0423738	0.147095	0.0129878	0.0213188	0.0560271	0.0563393	0.19135	0.537854	0.0129878	0.0270415	0.0978175	0.0563393
DAG(16:1/18:0) (µmol/L)	0.314802	0.427438	0.588985	0.303606	0.457006	0.610171	0.347163	0.461783	0.649269	0.336542	0.468884	0.600071	0.318262	0.428179	0.593897	0.314316	0.466609	0.589386	0.278218	0.357319	0.498023	0.219546	0.396759	0.446599	0.338251	0.44545	0.608695	0.293064	0.37069	0.635642	0.286039	0.386968	0.549917	0.267801	0.38164	0.497561	0.318947	0.391955	0.637572	0.317278	0.574158	0.732102	0.335477	0.442971	0.820904	0.323399	0.460409	0.685831	0.335477
DAG(16:1/18:1) (µmol/L)	0.0349242	0.057563	0.11034	0.0374821	0.0493189	0.0884063	0.035651	0.048775	0.123376	0.0311273	0.0436549	0.179208	0.0351407	0.0574036	0.117138	0.0353361	0.0479039	0.104118	0.0288414	0.043024	0.154565	0.0452316	0.0799459	0.136436	0.0370717	0.0776158	0.22716	0.0359039	0.0499035	0.214089	0.0294474	0.047705	0.190688	0.0370066	0.0577628	0.176022	0.0209791	0.0428357	0.0800451	0.0408759	0.128183	0.211931	0.0328557	0.0460162	0.202681	0.0333518	0.0561821	0.121885	0.0328557
DAG(16:0/18:2) (µmol/L)	0.022585	0.0335809	0.0541784	0.0174611	0.026466	0.0470003	0.0150284	0.0465616	0.0619742	0.0280043	0.0417374	0.0781891	0.0213338	0.0340379	0.0552564	0.0190282	0.0316267	0.0560666	0.0182911	0.0293456	0.0452257	0.00760997	0.0218159	0.0609944	0.0216068	0.0431584	0.0614203	0.0280722	0.0467233	0.0636492	0.0195496	0.0325835	0.0516992	0.0244336	0.0364809	0.0594528	0.00975411	0.0415528	0.0527242	0.0158775	0.0385365	0.0616938	0.0320682	0.0689783	0.187802	0.0139928	0.0415528	0.0530915	0.0320682
DAG(16:1/18:2) (µmol/L)	0.347852	0.582286	0.864125	0.359851	0.511316	0.814977	0.355566	0.58329	0.854587	0.35152	0.524558	0.779276	0.348513	0.58329	0.86112	0.35856	0.51238	0.800119	0.320253	0.461463	0.625155	0.295791	0.52681	0.824915	0.322086	0.62164	0.996444	0.270985	0.469529	0.604279	0.320253	0.468553	0.71266	0.300349	0.479395	0.638781	0.373924	0.609785	0.842875	0.223332	0.639516	1.04369	0.35559	0.7048	0.899556	0.354748	0.609785	0.840527	0.35559
DAG(16:1/20:0) (µmol/L)	0.149485	0.216031	0.476089	0.14088	0.212758	0.521849	0.137449	0.240696	0.851475	0.127659	0.179803	1.04146	0.147551	0.217681	0.48006	0.13197	0.197002	0.575659	0.139882	0.184576	0.803453	0.114236	0.240969	0.59554	0.151365	0.276264	1.17188	0.14066	0.195235	1.32895	0.142723	0.20003	0.91655	0.136453	0.214684	1.20992	0.0902384	0.160324	0.331924	0.159526	0.212773	0.945112	0.116814	0.164971	1.32252	0.106541	0.210047	0.363488	0.116814
DAG(18:1/18:1) (µmol/L)	0.103975	0.167628	0.286753	0.0943115	0.141639	0.259505	0.097033	0.126946	0.285683	0.180376	0.212328	0.293887	0.102898	0.159573	0.284852	0.11641	0.175104	0.264124	0.122452	0.166234	0.24815	0.0956725	0.191576	0.344997	0.114791	0.224911	0.32553	0.186634	0.265224	0.396471	0.118938	0.173173	0.283081	0.163758	0.239365	0.374313	0.107066	0.161698	0.29027	0.138908	0.193304	0.350077	0.178907	0.530449	0.775009	0.107998	0.168405	0.29475	0.178907
DAG(18:1/18:2) (µmol/L)	0.0956584	0.139254	0.240405	0.108239	0.15403	0.235091	0.0799661	0.153391	0.278422	0.0885391	0.18203	0.216394	0.094751	0.143715	0.24103	0.1012	0.163265	0.233143	0.057205	0.142327	0.19456	0.0313066	0.141999	0.176674	0.105693	0.152001	0.252325	0.100641	0.180402	0.33571	0.0704276	0.144214	0.217078	0.0982242	0.161017	0.315915	0.103541	0.182341	0.24545	0.118198	0.220223	0.413699	0.09248	0.26744	0.670024	0.118198	0.182341	0.321385	0.09248
DAG(20:0/20:0) (µmol/L)	0.0396529	0.0576429	0.0950262	0.0355216	0.0586098	0.0869871	0.0441435	0.0700382	0.106344	0.036777	0.063209	0.140351	0.040422	0.0580438	0.100154	0.0358293	0.0591813	0.0949483	0.0397001	0.0588133	0.0848634	0.0171254	0.0355421	0.111757	0.0360651	0.0644613	0.107678	0.0429049	0.0682648	0.103184	0.0383477	0.0601324	0.092224	0.0393574	0.0662602	0.10605	0.0485815	0.0851064	0.114619	0.037296	0.0498472	0.0803159	0.0407032	0.0637375	0.0900759	0.0413616	0.0666104	0.108929	0.0407032
DAG(18:2/22:4) (µmol/L)	0.00928746	0.0141386	0.0212232	0.00662408	0.0125801	0.019977	0.00480526	0.00942877	0.0146279	0.00682402	0.00963594	0.0169266	0.00864622	0.0133621	0.0196447	0.00694065	0.0117947	0.0196447	0.00786295	0.0125975	0.0196447	0.00457491	0.0243536	0.0281277	0.00893795	0.013911	0.0180956	0.00863424	0.0102111	0.0196583	0.00787385	0.0133621	0.0196311	0.00807279	0.0102111	0.0243536	0.00501545	0.0110089	0.0156012	0.00846095	0.0187054	0.0347421	0.00985646	0.0147646	0.034537	0.00579155	0.0121923	0.0220223	0.00985646
DAG(18:0/22:6) (µmol/L)	0.0295665	0.0517769	0.103966	0.030293	0.0432333	0.136016	0.0289071	0.041386	0.126112	0.0345036	0.0690044	0.27672	0.0297346	0.0504251	0.103112	0.031343	0.0482036	0.180402	0.0302963	0.0524936	0.160906	0.0332225	0.0514522	0.310256	0.0335871	0.0495422	0.321521	0.0532264	0.0680758	0.228345	0.0304648	0.052312	0.1762	0.0430823	0.0668599	0.211385	0.0340497	0.0577213	0.0723641	0.0278671	0.104054	0.76969	0.0356065	0.0611411	0.127387	0.029153	0.0593046	0.296214	0.0356065
CE(22:6) (µmol/L)	34.7304	58.261	107.327	23.1087	43.2274	67.7656	32.3065	61.6434	109.069	12.1478	32.7378	72.7261	34.7484	59.6262	107.253	20.5758	41.0092	68.5875	45.6922	72.1974	107.625	48.068	64.0178	125.675	32.3681	66.122	102.766	34.7725	55.9426	74.8471	42.4554	70.6626	104.32	36.15	59.8747	85.1221	36.7456	68.2402	103.86	37.1557	44.5925	90.4221	42.5142	63.201	89.4416	38.4954	66.0994	99.7349	42.5142
CE(20:0) (µmol/L)	15.5186	24.6308	36.4934	16.0073	23.1329	32.7251	19.8611	29.0784	42.2376	17.6364	29.6276	57.8881	15.6368	25.0003	37.5275	16.3235	23.8493	41.0092	14.3589	22.1752	31.6224	13.3579	14.1962	38.0609	15.5854	24.0875	38.1717	20.0409	25.721	43.983	15.5503	22.5784	33.2176	17.5511	23.5863	40.7163	19.0122	28.8413	43.034	20.6353	24.4413	31.3952	18.3903	28.4799	39.7498	20.6353	25.6587	34.5906	18.3903
CE(16:0) (µmol/L)	112.157	165.592	231.279	126.249	173.03	216.384	112.898	170.057	208.789	94.0696	123.972	206.701	112.741	167.716	226.894	113.368	157.682	214.209	105.484	134.445	209.075	101.843	128.225	275.083	107.053	147.739	210.262	108.826	179.256	237.022	105.776	141.619	209.075	106.681	154.973	251.565	98.9773	129.073	159.42	138.828	209.045	309.33	134.166	179.38	290.798	118.282	144.175	194.873	134.166
CE(16:1) (µmol/L)	21.1762	29.5765	51.2196	19.5148	28.6383	42.4308	23.1831	38.5023	57.0741	32.4829	45.8713	89.195	21.6887	31.8865	51.728	21.0957	33.8686	55.8651	21.5091	36.224	56.2926	33.7128	45.443	72.623	20.3048	41.3098	61.0698	26.665	38.0513	125.877	21.5091	36.375	56.7235	31.3651	39.2297	101.207	14.2284	19.9535	36.0239	19.6282	44.2432	68.3703	18.2886	25.1917	85.1465	16.7667	24.8755	47.1116	18.2886
CE(18:0) (µmol/L)	44.6627	64.6474	90.205	38.8509	56.3707	79.6576	36.4282	47.5006	75.0524	45.5784	65.7235	90.7355	42.9884	61.26	88.027	39.8878	57.7951	81.4518	40.054	54.8673	74.1243	32.1476	58.7593	90.9963	36.3319	56.6504	71.1681	46.717	69.4005	98.7613	39.0669	55.3256	73.3576	43.8205	68.4451	98.0815	52.9265	65.0681	87.7183	55.1667	82.392	107.337	48.1637	67.5496	108.75	54.1697	67.7958	95.4702	48.1637
CE(18:1) (µmol/L)	491.476	641.087	825.576	421.96	584.425	724.804	525.273	691.159	749.558	572.024	676.477	963.87	502.812	645.322	805.575	487.708	616.892	765.827	502.812	673.659	849.149	551.349	655.916	814.226	421.051	659.811	867.19	522.351	767.953	1149.57	465.899	664.384	851.507	553.996	749.027	1070.94	453.118	640.464	774.438	582.745	849.944	987.766	563.345	872.417	1087.56	544.219	662.004	901.155	563.345
CE(18:2) (µmol/L)	1767.97	2265.17	2769.01	1641.02	2199.37	2711.5	1658.76	2216.2	2821.75	1919.06	2584.97	2902.77	1764.29	2250.26	2799.35	1642.72	2315.13	2781.94	1621.23	2096.66	2657.54	1445.78	2221.1	2573.81	1654.81	1952.28	2467.17	1738.8	2256.51	2864.12	1645	2043.57	2630.05	1712.1	2256.51	2806.15	1963.91	2140.84	2501.74	2384.15	2665.45	2961.93	2054.93	2460.74	3173.53	2017.02	2409.64	2754.31	2054.93
CE(18:3) (µmol/L)	109.763	169.125	241.918	103.253	158.339	242.269	102.246	150.11	265.144	106.259	175.874	230.677	107.327	167.483	241.834	104.828	167.367	239.499	130.588	177.771	237.022	158.986	221.794	284.341	86.8355	150.647	223.275	127.989	187.127	282.259	122.605	168.065	232.95	133.612	200.003	280.896	207.22	237	290.515	181.847	195.384	293.422	91.005	125.79	143.099	191.258	227.371	283.031	91.005
CE(20:3) (µmol/L)	76.235	107.588	147.899	85.9212	113.683	144.495	54.157	92.7885	157.867	64.646	100.128	137.065	73.4085	107.327	146.919	79.1147	102.67	144.195	78.3507	108.074	149.902	84.8301	125	146.132	50.215	101.082	131.596	86.5748	106.586	143.199	72.9014	106.734	147.941	86.7552	116.556	144.652	72.692	110.007	173.938	78.4073	129.472	195.144	61.4727	103.959	128.433	78.4073	125.013	191.036	61.4727
CE(20:4) (µmol/L)	357.334	486.959	672.611	392.509	546.802	757.801	295.193	493.831	698.383	311.318	405.879	693.347	356.035	493.831	675.061	347.02	530.01	706.661	356.529	566.085	722.51	368.615	472.755	648.62	347.82	488.893	680.057	350.404	506.309	566.477	355.788	549.081	717.52	353.343	506.309	601.016	511.227	837.942	965.807	314.066	554.526	724.714	316.898	443.833	585.642	451.144	644.99	884.038	316.898
CE(20:5) (µmol/L)	29.4743	68.756	135.394	21.7153	36.5772	57.5278	44.106	80.6652	224.181	17.7277	39.5202	80.28	30.8859	69.4486	139.67	21.0081	37.5795	58.9277	35.1359	89.8767	215.848	82.7434	142.175	321.882	47.4575	92.8904	146.367	34.7484	132.411	187.907	40.1652	91.8925	193.995	53.08	132.411	202.779	36.1293	80.0747	156.868	15.087	35.046	50.3474	64.8428	92.7242	104.031	25.157	52.1014	104.471	64.8428
PE(14:0/20:4) (µmol/L)	0.0133674	0.0237984	0.0424285	0.0109188	0.0208173	0.0342069	0.0164409	0.0202621	0.0393845	0.0110137	0.0218245	0.0291468	0.0141302	0.0235509	0.0402443	0.0109945	0.0209476	0.0321938	0.013368	0.027128	0.0449644	0.0202224	0.053899	0.0764805	0.0142235	0.0257944	0.0398283	0.0196807	0.0320824	0.0470692	0.0137058	0.0268847	0.0443147	0.0205194	0.0361948	0.053899	0.00856597	0.0282562	0.0768078	0.00805464	0.0220523	0.036566	0.020545	0.0304995	0.0414618	0.00926277	0.0220523	0.0481043	0.020545
PE(16:0/16:0) (µmol/L)	0.0846538	0.14141	0.220666	0.0767301	0.123358	0.215273	0.0886033	0.143979	0.223983	0.0950204	0.17386	0.336909	0.0850189	0.142292	0.222508	0.0793255	0.126651	0.247402	0.112885	0.160643	0.237324	0.190245	0.228726	0.26527	0.128684	0.19434	0.314946	0.107539	0.235032	0.327355	0.118744	0.162209	0.255417	0.118836	0.233085	0.326224	0.0741325	0.124306	0.158368	0.118159	0.189553	0.372737	0.104092	0.156467	0.378385	0.0931604	0.142552	0.225051	0.104092
PE(16:0/16:1) (µmol/L)	0.0846538	0.14141	0.220666	0.0767301	0.123358	0.215273	0.0886033	0.143979	0.223983	0.0950204	0.17386	0.336909	0.0850189	0.142292	0.222508	0.0793255	0.126651	0.247402	0.112885	0.160643	0.237324	0.190245	0.228726	0.26527	0.128684	0.19434	0.314946	0.107539	0.235032	0.327355	0.118744	0.162209	0.255417	0.118836	0.233085	0.326224	0.0741325	0.124306	0.158368	0.118159	0.189553	0.372737	0.104092	0.156467	0.378385	0.0931604	0.142552	0.225051	0.104092
PE(16:0/18:1) (µmol/L)	1.0103	1.4519	2.71641	0.805011	1.22343	1.93854	0.885817	1.27273	2.18221	1.29856	2.21357	4.3648	0.988922	1.44486	2.68501	0.890031	1.35184	2.65172	1.31124	1.89333	3.08641	1.29141	2.59478	3.7336	1.18696	1.75505	3.54481	1.80241	3.08213	4.09802	1.28603	1.89202	3.14471	1.63575	3.01034	3.92666	1.07918	1.65868	1.99516	1.30605	1.96676	2.51216	1.29318	2.94635	3.44363	1.08067	1.77785	2.29499	1.29318
PE(16:0/18:2) (µmol/L)	3.30748	4.77311	6.99579	3.21694	4.93458	6.96257	3.26462	5.59806	7.51574	4.16172	7.47102	13.5011	3.32402	4.92433	7.10546	3.81565	5.17991	8.55002	4.14085	5.64091	8.08881	4.49204	5.85765	9.71097	3.63458	6.09719	9.42132	4.22786	8.35667	12.6225	4.05283	5.67228	8.58565	4.45299	8.19605	11.7102	4.29086	5.48652	7.15876	5.29121	9.04329	12.1648	6.24165	7.76469	15.7899	4.52749	6.32005	9.24725	6.24165
PE(16:0/18:3) (µmol/L)	0.0294598	0.0475121	0.0735658	0.023975	0.0405242	0.0738976	0.028915	0.0638543	0.111114	0.0277594	0.0778435	0.18099	0.0291154	0.0477263	0.0767297	0.0251539	0.0471345	0.0960499	0.0341239	0.0588803	0.102944	0.0586675	0.087961	0.157519	0.0327974	0.0862785	0.115702	0.0567564	0.0851959	0.178244	0.0337944	0.0638986	0.108663	0.0595401	0.0851959	0.177139	0.0223682	0.0486794	0.0576819	0.0309431	0.0928904	0.106928	0.0577085	0.067355	0.185042	0.0309431	0.054753	0.0895481	0.0577085
PE(16:0/20:2) (µmol/L)	0.0295733	0.0446545	0.0674927	0.0264801	0.0454974	0.0691938	0.0228604	0.0421574	0.0550515	0.0500748	0.0683663	0.0953964	0.029257	0.044284	0.0666583	0.0283979	0.0519378	0.0744764	0.0373675	0.054369	0.0940732	0.0293813	0.0703271	0.0893521	0.0364638	0.0593518	0.0941065	0.040412	0.0621513	0.113749	0.0373675	0.0544822	0.0940732	0.0374463	0.0621513	0.10486	0.0334395	0.0619962	0.0945481	0.0630436	0.109328	0.13268	0.0577886	0.0830387	0.152505	0.0441438	0.0839508	0.117143	0.0577886
PE(16:0/20:3) (µmol/L)	0.131938	0.225	0.387476	0.138359	0.196408	0.287261	0.118998	0.192366	0.359048	0.182151	0.425145	0.561431	0.132212	0.219445	0.387409	0.152083	0.217929	0.441942	0.190773	0.285177	0.460071	0.194662	0.326809	0.443981	0.178568	0.320741	0.508808	0.252425	0.373435	0.66431	0.184019	0.290162	0.463271	0.233379	0.369572	0.645331	0.15897	0.207289	0.364926	0.187562	0.41758	0.635649	0.247573	0.332155	0.717936	0.163325	0.271688	0.531592	0.247573
PE(16:0/20:4) (µmol/L)	1.40292	2.06398	3.51052	1.39457	2.17186	3.06992	1.30272	1.99298	3.03459	1.36275	3.45589	5.67197	1.36692	2.06326	3.45558	1.43886	2.22057	3.81036	1.70637	2.37007	3.63997	1.61555	2.66164	5.36692	1.62636	2.78768	3.79964	2.17186	3.7449	5.02084	1.67589	2.44008	3.63997	2.0365	3.63493	4.80611	2.01547	2.49939	2.88359	1.3109	3.01321	4.2946	1.96554	2.51216	8.99378	1.80559	2.59976	3.34636	1.96554
PE(16:0/20:5) (µmol/L)	0.00997432	0.0200181	0.0546637	0.00634614	0.0120646	0.0263955	0.0157548	0.0410046	0.0773987	0.0165228	0.03416	0.0566759	0.0103439	0.02267	0.0678235	0.00737535	0.0169206	0.0343613	0.0186449	0.0448089	0.0938128	0.040704	0.108057	0.126963	0.0173783	0.0468576	0.106809	0.0217465	0.0381262	0.161424	0.0180598	0.0462606	0.0947276	0.0225512	0.0486279	0.149173	0.00365735	0.0149178	0.0462979	0.00260952	0.0109856	0.0403253	0.0299132	0.0513294	0.0829812	0.00278472	0.0137259	0.0403253	0.0299132
PE(16:0/22:4) (µmol/L)	0.0874252	0.143881	0.255267	0.150031	0.205745	0.261284	0.0587261	0.119819	0.258733	0.121686	0.307708	0.749462	0.0827514	0.138785	0.255594	0.146495	0.22359	0.3465	0.0997132	0.174093	0.312283	0.0664625	0.142245	0.28975	0.0755429	0.186632	0.334237	0.153353	0.242478	0.417523	0.0929068	0.174093	0.313151	0.0971789	0.228446	0.367853	0.102866	0.160116	0.260479	0.215419	0.382638	0.451519	0.0656495	0.24097	0.452794	0.108201	0.259088	0.380119	0.0656495
PE(16:0/22:5) (µmol/L)	0.503892	0.760192	1.23621	0.514979	0.775355	0.988239	0.526494	0.717936	1.10496	0.556418	1.35362	2.17896	0.50485	0.757821	1.21835	0.549019	0.846116	1.26745	0.655618	0.924617	1.39467	0.580327	1.00576	1.45602	0.591319	1.03353	2.08801	0.931048	1.42892	1.69341	0.644355	0.944045	1.63572	0.872883	1.40437	1.63132	0.706895	0.908229	0.960716	0.396015	1.49127	2.00789	0.648837	1.30489	3.0566	0.618609	0.94028	1.42862	0.648837
PE(16:0/22:6) (µmol/L)	0.236183	0.483313	0.794902	0.181745	0.314674	0.533026	0.277582	0.502407	0.772311	0.320656	0.570609	1.01586	0.239638	0.489007	0.787815	0.220359	0.361716	0.639018	0.423645	0.69204	1.21919	0.425469	0.97094	1.13288	0.395992	0.74017	1.54012	0.477287	0.946666	1.75556	0.423352	0.704625	1.31124	0.468042	0.946666	1.57516	0.31163	0.578917	1.03886	0.396295	0.648229	0.938828	0.367783	1.18997	2.5543	0.400143	0.578917	0.938828	0.367783
PE(18:0/18:0) (µmol/L)	0.716697	0.975658	1.34183	0.553806	0.745318	1.21953	0.729754	1.05917	1.40097	0.693974	0.913866	1.75862	0.717936	0.98073	1.33786	0.569958	0.850232	1.33601	0.984135	1.22343	1.61544	1.32257	1.54999	2.30743	0.715604	1.18887	1.60321	0.831581	1.32311	1.96146	0.900581	1.21751	1.60985	0.901966	1.37643	2.02314	0.690138	1.13797	1.47964	0.667905	0.841592	1.52723	1.04676	1.71705	2.18091	0.680567	1.02182	1.39678	1.04676
PE(18:0/18:1) (µmol/L)	13.4516	18.2324	27.5852	12.8276	17.8757	25.874	12.742	19.8756	34.7752	17.4935	26.6337	37.2404	13.5004	18.2766	28.4021	13.8799	19.5071	29.5263	16.9702	21.7799	30.3985	22.8385	30.6815	45.7265	13.1723	20.8814	30.7494	21.5248	25.3678	36.833	16.5519	21.2432	30.3985	21.7281	25.562	40.1814	13.4122	18.5579	23.7479	10.5378	14.9058	55.2615	19.2385	21.8556	35.6771	13.0555	16.0652	27.2831	19.2385
PE(18:0/18:2) (µmol/L)	37.9343	58.1957	92.5673	43.9238	74.5392	102	41.6842	62.2037	96.0682	53.53	75.2081	98.6283	39.1497	60.5867	92.8563	45.8525	74.5392	101.261	42.6634	64.7105	94.6761	44.5232	80.9623	148.193	44.2092	61.3789	97.2114	50.3154	75.7896	110.12	43.1991	64.219	95.0048	49.2571	75.7896	110.772	38.8548	48.3946	93.7831	28.9548	50.4962	192.198	36.604	78.7893	112.2	36.4405	48.3946	103.178	36.604
PE(18:0/18:3) (µmol/L)	0.1901	0.298009	0.525928	0.20157	0.358968	0.536695	0.267988	0.397748	0.690162	0.255492	0.56009	0.759894	0.201232	0.301855	0.557455	0.219292	0.369828	0.582742	0.294416	0.430453	0.62327	0.43343	0.570714	0.69598	0.207971	0.33861	0.617566	0.285572	0.405262	0.769999	0.260965	0.406951	0.62327	0.323165	0.444707	0.690221	0.326023	0.39902	0.565862	0.230032	0.386505	0.749758	0.318403	0.376293	0.638133	0.253257	0.39902	0.571251	0.318403
PE(18:0/20:1) (µmol/L)	0.165331	0.251915	0.380095	0.130983	0.224833	0.298891	0.201423	0.302483	0.397442	0.22345	0.299614	0.420866	0.170274	0.25524	0.383136	0.153992	0.241975	0.329632	0.225927	0.333077	0.439803	0.290372	0.425446	0.572005	0.191602	0.329302	0.380239	0.234706	0.394454	0.50942	0.217024	0.332155	0.42837	0.243915	0.394454	0.519501	0.137305	0.199421	0.267248	0.184432	0.221693	0.371909	0.380226	0.404982	0.481273	0.150905	0.211197	0.253105	0.380226
PE(18:0/20:2) (µmol/L)	0.737356	1.08631	1.5217	0.71769	0.929114	1.67193	0.596022	1.02025	1.58534	1.12442	1.3913	1.98743	0.713472	1.08367	1.5188	0.782915	1.18832	1.74222	0.932986	1.32036	1.86597	1.00699	1.2677	2.22195	0.871082	1.2972	1.8046	1.15824	1.43488	2.25625	0.932986	1.32036	1.83646	1.05992	1.43488	2.22388	0.702975	1.15466	1.61671	0.752506	1.03135	2.90598	1.09956	1.37262	2.00963	0.773918	1.05239	1.85233	1.09956
PE(18:0/20:3) (µmol/L)	2.89853	4.094	7.26172	2.86777	3.65514	5.83692	2.28054	4.60094	7.48879	3.63415	6.04372	11.6593	2.77585	4.13798	7.20465	3.09927	4.05283	7.45355	3.20634	5.41488	16.1552	3.03087	4.30549	11.7684	3.13434	4.27839	7.62593	3.41273	5.02432	8.75391	3.20634	4.84981	10.203	3.29516	4.92092	8.5698	2.15489	10.1823	29.9245	2.95083	6.58855	11.9191	3.37978	4.4227	8.62144	2.39915	6.67488	17.3812	3.37978
PE(18:0/20:4) (µmol/L)	3.24359	4.51749	6.93998	3.53325	4.19284	6.99807	2.91694	4.95171	7.80327	3.32044	7.39202	11.1748	3.16001	4.56916	6.93035	3.49896	4.62973	7.9664	4.43806	5.66049	7.5576	4.15464	6.18524	8.48669	3.36109	6.02792	8.60955	4.61052	9.27231	11.3603	4.13225	5.68803	7.80245	4.56934	7.9996	11.3171	4.49337	4.75551	6.03824	3.68552	6.61537	9.42881	3.85286	7.18968	13.9088	4.42241	5.2031	7.64323	3.85286
PE(18:0/20:5) (µmol/L)	0.127557	0.24333	0.482054	0.0838514	0.131481	0.249216	0.154537	0.338195	0.900352	0.135507	0.17949	0.351305	0.128508	0.254357	0.545227	0.0884452	0.147412	0.263692	0.179484	0.490365	0.860906	0.358376	0.732085	1.18576	0.151467	0.444567	1.05433	0.194377	0.414639	0.837365	0.166308	0.45626	0.890649	0.267096	0.423058	0.944373	0.126652	0.283206	0.47285	0.0711302	0.10821	0.251194	0.268116	0.375251	0.728968	0.0841899	0.232512	0.339267	0.268116
PE(18:0/22:4) (µmol/L)	0.214111	0.309912	0.450852	0.266449	0.399683	0.581958	0.159042	0.284584	0.401021	0.244007	0.462712	0.720547	0.209486	0.298526	0.437674	0.263145	0.416367	0.605386	0.224522	0.310557	0.532159	0.209668	0.337817	0.506908	0.178521	0.309375	0.507987	0.263145	0.41092	0.565237	0.211383	0.309697	0.527019	0.256134	0.392272	0.539991	0.293157	0.392946	0.496643	0.219223	0.431337	0.993139	0.197912	0.327355	0.402184	0.276929	0.392946	0.59602	0.197912
PE(18:0/22:5) (µmol/L)	0.956703	1.59818	2.37048	1.01807	1.58769	2.10896	1.28693	1.70164	2.55621	1.05149	1.70182	3.04958	1.0345	1.61432	2.37171	1.04603	1.61544	2.28933	1.22004	2.03768	3.02289	0.916744	2.56512	3.34406	1.15341	1.7311	2.91273	1.74222	2.14641	2.94635	1.21751	1.87895	3.00201	1.69981	2.30047	2.98357	1.18366	1.48018	1.70605	0.920198	1.8502	2.97041	1.39758	2.11247	2.72061	1.17059	1.49539	2.28469	1.39758
PE(18:0/22:6) (µmol/L)	0.16172	0.303546	0.574926	0.105545	0.167001	0.266652	0.167168	0.439498	0.612395	0.162403	0.355259	0.697795	0.164474	0.314238	0.580323	0.108663	0.23357	0.452481	0.260242	0.444707	0.65335	0.341369	0.618909	0.792458	0.286919	0.532045	1.2502	0.284782	0.521207	1.13676	0.271294	0.458479	0.732006	0.289395	0.536232	1.06565	0.160927	0.348978	0.654682	0.135315	0.289035	0.418918	0.343154	0.657439	1.42004	0.149647	0.32772	0.433265	0.343154
PE(18:1/16:1) (µmol/L)	0.117191	0.150306	0.224535	0.0927476	0.133872	0.176403	0.0856156	0.120402	0.215033	0.0803147	0.160198	0.239023	0.112495	0.147822	0.221738	0.0922011	0.138593	0.188407	0.126038	0.180357	0.26169	0.152735	0.248092	0.328701	0.117493	0.148863	0.246221	0.147208	0.199426	0.286167	0.122761	0.174455	0.256838	0.15076	0.208039	0.280433	0.0614112	0.136104	0.203195	0.0783384	0.154562	0.283192	0.159865	0.196954	0.255772	0.0666361	0.14496	0.182392	0.159865
PE(18:1/18:1) (µmol/L)	2.30935	3.14477	4.75778	2.45969	3.26465	4.41827	1.89588	3.2421	4.56388	2.32332	4.38916	6.4776	2.26095	3.17538	4.71719	2.40815	3.52574	4.73685	2.9179	3.73195	5.36258	2.17163	3.76285	4.63661	2.50899	3.69591	5.75712	2.5543	4.59456	5.85199	2.8146	3.70103	5.44121	2.3882	4.00535	5.62761	2.3491	3.93311	4.87329	2.78195	3.58204	5.31437	2.5052	4.34974	5.35515	2.91973	3.71395	4.78609	2.5052
PE(18:1/18:2) (µmol/L)	1.94321	3.10653	6.08153	1.93943	3.06296	5.06394	2.42148	2.96479	4.62826	1.7722	4.359	8.29761	2.00406	3.03549	5.74349	1.87895	3.42933	5.44876	2.23756	4.25137	7.35603	2.011	2.89674	4.85573	1.91123	2.94095	5.64586	2.19151	4.45346	6.91116	2.07186	4.01925	7.31536	2.2022	4.08384	6.32534	2.41547	6.69672	11.0355	2.55755	3.64619	6.85216	1.78253	3.2466	7.21464	2.58628	4.97417	10.5899	1.78253
PE(18:1/18:3) (µmol/L)	0.0237373	0.0488143	0.0907429	0.0276504	0.0472326	0.0762701	0.0364803	0.0689612	0.11199	0.0411294	0.0862363	0.128075	0.0271657	0.0510809	0.0929068	0.0291558	0.0552427	0.0859075	0.0389004	0.0585953	0.0969865	0.0391347	0.0703593	0.133761	0.0249397	0.0575092	0.105686	0.0553194	0.0910579	0.138497	0.0355977	0.0577085	0.101245	0.052971	0.0872881	0.137733	0.0611168	0.0816766	0.128385	0.0415722	0.085791	0.125165	0.0325529	0.0755161	0.118744	0.0571549	0.0816766	0.117617	0.0325529
PE(18:1/20:1) (µmol/L)	0.0287498	0.0438717	0.0648023	0.0266226	0.0437046	0.0543129	0.0249421	0.0476272	0.0991297	0.0337821	0.0522587	0.0759797	0.0288343	0.0452772	0.067542	0.0281432	0.044871	0.0610836	0.0351563	0.0548992	0.094859	0.0151035	0.0465904	0.0803826	0.0324039	0.0668492	0.0951908	0.0404961	0.0657862	0.0943344	0.0348168	0.0573894	0.094859	0.0360147	0.0657862	0.0917871	0.0225258	0.0409573	0.0645662	0.0258184	0.0541892	0.0755936	0.0405804	0.0665659	0.11164	0.0271466	0.0427433	0.0709334	0.0405804
PE(18:1/20:2) (µmol/L)	0.028655	0.0447161	0.0656271	0.0328836	0.0564035	0.0784234	0.0263244	0.0449956	0.07131	0.0420725	0.0626777	0.0791356	0.0285954	0.044871	0.0659688	0.0364466	0.056993	0.0783962	0.0362451	0.0548611	0.085848	0.0230641	0.0325338	0.0503407	0.0385778	0.0624986	0.100435	0.0452458	0.0742702	0.0866851	0.0364972	0.0558588	0.0929068	0.0377913	0.0605356	0.0837569	0.0251708	0.0789668	0.136667	0.0336709	0.0722089	0.143072	0.0542937	0.0802657	0.142687	0.030319	0.0722089	0.1353	0.0542937
PE(18:1/20:3) (µmol/L)	0.170011	0.26124	0.441636	0.192992	0.277379	0.404569	0.121257	0.189849	0.326843	0.20221	0.420865	0.69425	0.165388	0.254534	0.411205	0.20179	0.321954	0.490025	0.190773	0.30501	0.423645	0.153703	0.263682	0.40219	0.166492	0.245183	0.483116	0.147924	0.376554	0.563282	0.176278	0.286961	0.423645	0.157694	0.30501	0.509581	0.209308	0.323349	0.603316	0.200466	0.357531	0.471503	0.124303	0.339369	0.531053	0.219984	0.323349	0.471503	0.124303
PE(18:1/20:4) (µmol/L)	1.80397	2.71119	4.14235	1.90189	2.74143	4.25723	1.79792	2.39816	3.75266	1.8053	3.84684	5.71117	1.80491	2.71119	4.03601	1.89596	3.27145	4.66516	1.81495	2.87175	4.37089	1.23236	2.45613	3.13212	1.69024	2.34474	3.58353	1.60985	3.90935	5.00694	1.80116	2.84993	4.34672	1.52986	2.9179	4.74392	3.00075	4.24069	4.8709	2.24781	3.02297	4.62101	1.37166	3.79718	5.99986	2.71678	3.63684	4.65468	1.37166
PE(18:1/22:4) (µmol/L)	0.0209624	0.0414911	0.0816406	0.0326059	0.0584736	0.0927352	0.0161789	0.027564	0.0604565	0.0374355	0.0576394	0.193654	0.019914	0.0400495	0.0773705	0.0337242	0.0584736	0.113828	0.0235673	0.0432525	0.0908058	0.0159274	0.0288153	0.0572938	0.0172891	0.0508458	0.0782655	0.018632	0.0430133	0.0827514	0.0214174	0.0433426	0.084023	0.0183773	0.0406649	0.0739882	0.0496155	0.0886318	0.101142	0.02488	0.0873835	0.137277	0.00626239	0.052809	0.0824651	0.0371037	0.0886318	0.104191	0.00626239
PE(18:1/22:5) (µmol/L)	0.0562278	0.0961193	0.153417	0.0654905	0.102517	0.160008	0.0369171	0.0608301	0.105795	0.072514	0.15886	0.218243	0.0516148	0.0869861	0.141114	0.0692966	0.113907	0.176278	0.0715417	0.101526	0.165618	0.0394473	0.0807124	0.127286	0.0647574	0.090202	0.148584	0.0481583	0.122932	0.205887	0.065196	0.0970538	0.164702	0.0475649	0.109116	0.18634	0.119992	0.168399	0.183874	0.088557	0.167418	0.205357	0.0544822	0.112495	0.135929	0.114122	0.168399	0.183449	0.0544822
PE(18:1/22:6) (µmol/L)	0.121223	0.171996	0.253933	0.0984277	0.160309	0.234132	0.0783163	0.150928	0.219825	0.107755	0.141643	0.336268	0.114858	0.162772	0.244165	0.106426	0.158761	0.257372	0.113828	0.20207	0.332385	0.131406	0.167165	0.217721	0.143462	0.262054	0.409674	0.106132	0.255594	0.425116	0.126826	0.211529	0.354763	0.118173	0.200674	0.335762	0.191635	0.199152	0.271923	0.108701	0.196361	0.393876	0.0956513	0.191038	0.831581	0.138168	0.199152	0.306222	0.0956513
PE(18:2/16:1) (µmol/L)	0.449667	0.63925	0.98619	0.404359	0.640792	1.07264	0.335351	0.567593	0.794099	0.396826	0.656367	1.01463	0.448733	0.635044	0.927184	0.402184	0.643909	1.05331	0.512253	0.802141	1.03665	0.694952	0.872165	1.07254	0.424016	0.543192	0.961475	0.473661	0.669394	1.34437	0.454681	0.733022	1.02167	0.516369	0.705114	1.28288	0.493389	0.683892	1.09731	0.504864	0.835828	1.14704	0.537348	0.721428	1.16065	0.500797	0.684587	1.09508	0.537348
PE(18:2/18:2) (µmol/L)	0.139197	0.241473	0.381132	0.170925	0.227026	0.333546	0.147024	0.197912	0.304358	0.208211	0.295759	0.50726	0.139654	0.231475	0.376293	0.173611	0.244673	0.349879	0.181109	0.280666	0.412061	0.205563	0.297887	0.428864	0.149245	0.240339	0.414289	0.170274	0.295643	0.564063	0.17349	0.278342	0.412061	0.174879	0.295643	0.513506	0.154079	0.373687	0.422646	0.180164	0.280534	0.512978	0.190773	0.287559	0.531421	0.184226	0.331843	0.417117	0.190773
PE(18:2/20:1) (µmol/L)	0.0309307	0.0516032	0.0823692	0.0283722	0.0496153	0.0709005	0.0323858	0.059868	0.100274	0.0450234	0.0783961	0.0976989	0.0309681	0.0526628	0.0841979	0.0314222	0.0547851	0.0789963	0.0375493	0.0592077	0.0888754	0.0146084	0.0411243	0.0618207	0.0324451	0.0638374	0.108859	0.0448399	0.0796561	0.126739	0.0373157	0.0617648	0.0908058	0.0353784	0.0708999	0.104507	0.0408452	0.0491879	0.0710777	0.0365756	0.0681098	0.0914977	0.0547092	0.0780168	0.17494	0.0414872	0.0610365	0.0746512	0.0547092
PE(18:2/20:4) (µmol/L)	0.0347754	0.0640159	0.0970037	0.0419683	0.0660146	0.0928753	0.0417316	0.0501686	0.0920582	0.0539775	0.0828029	0.127871	0.0352295	0.0631063	0.0965171	0.0433125	0.0711954	0.106796	0.039171	0.0657406	0.109343	0.0548363	0.0772968	0.154097	0.0423991	0.0779359	0.0972397	0.044871	0.103588	0.143381	0.0399663	0.0671219	0.106648	0.0511899	0.0938778	0.147574	0.0522585	0.0878897	0.131462	0.0627737	0.0798951	0.123961	0.0464856	0.0688656	0.127267	0.0546845	0.0815782	0.123961	0.0464856
PE(O-16:0/18:1) (µmol/L)	0.110812	0.166713	0.267848	0.0906172	0.145887	0.212336	0.0858134	0.14854	0.238997	0.110108	0.211237	0.300314	0.105838	0.165503	0.264241	0.0998515	0.149574	0.24723	0.150405	0.220818	0.329175	0.167996	0.225256	0.384611	0.116685	0.159478	0.212043	0.153459	0.178987	0.278535	0.14082	0.187756	0.28577	0.157834	0.188277	0.283146	0.126973	0.256757	0.415884	0.0988584	0.211262	0.360093	0.167697	0.29218	0.304587	0.10582	0.256757	0.360093	0.167697
PE(O-16:0/18:2) (µmol/L)	0.275368	0.357489	0.528304	0.210666	0.297287	0.474887	0.179714	0.258266	0.493745	0.236834	0.372492	0.513113	0.256126	0.34578	0.527019	0.218231	0.326222	0.494461	0.281641	0.436462	0.569958	0.320828	0.366206	0.898412	0.217718	0.333772	0.528489	0.266079	0.431349	0.655618	0.267373	0.419263	0.560167	0.280195	0.395001	0.657213	0.325123	0.39807	0.479348	0.301112	0.354004	0.617162	0.196272	0.473333	0.843189	0.309715	0.394187	0.511851	0.196272
PE(O-16:0/18:3) (µmol/L)	0.012214	0.0193159	0.0290051	0.0109513	0.0191426	0.033832	0.0100384	0.0179475	0.0318465	0.0131131	0.0209041	0.0375993	0.0121823	0.0192757	0.0292773	0.011335	0.019708	0.0366239	0.0138203	0.021822	0.0352539	0.00952696	0.0273639	0.053461	0.0123637	0.0223894	0.0368167	0.012577	0.0225916	0.0311188	0.013461	0.021822	0.0354745	0.0119013	0.0251714	0.0383554	0.00747917	0.0210024	0.0439377	0.0114083	0.0186168	0.0406462	0.0127525	0.037968	0.0491021	0.010832	0.0195227	0.037348	0.0127525
PE(O-16:0/20:3) (µmol/L)	0.0802275	0.129464	0.181775	0.0747119	0.108287	0.153221	0.0384697	0.0826941	0.170389	0.0639884	0.0989131	0.138903	0.0771563	0.125863	0.178244	0.0701666	0.10739	0.148953	0.0926496	0.13499	0.213148	0.142336	0.191478	0.26352	0.0978674	0.127179	0.162857	0.0946619	0.138018	0.235195	0.0945963	0.132671	0.185814	0.105878	0.159865	0.22694	0.0926957	0.134913	0.163487	0.0739336	0.107576	0.229559	0.131846	0.272236	0.321731	0.083217	0.118255	0.176518	0.131846
PE(O-16:0/20:4) (µmol/L)	0.260657	0.408223	0.715032	0.208534	0.375251	0.66825	0.178885	0.34626	0.639317	0.167323	0.397708	0.719231	0.256126	0.40414	0.68204	0.203476	0.375251	0.67265	0.364484	0.554373	0.899957	0.378739	0.726461	1.37388	0.303998	0.449487	0.737143	0.35085	0.520846	0.921418	0.342204	0.520846	0.7966	0.376197	0.520846	0.995469	0.344372	0.614262	1.14817	0.253021	0.330324	0.565418	0.463592	0.727958	1.06432	0.275335	0.526189	0.787081	0.463592
PE(O-16:0/20:5) (µmol/L)	0.0273334	0.0571909	0.10258	0.0208065	0.0389004	0.0560216	0.0318561	0.0638986	0.112796	0.0130185	0.0483955	0.0814242	0.0275449	0.058433	0.106796	0.0199416	0.042333	0.059785	0.0342187	0.0744248	0.179609	0.0476437	0.144471	0.224716	0.0408557	0.0683379	0.133725	0.042333	0.0837323	0.134058	0.0401329	0.0742188	0.160866	0.0465481	0.085551	0.166287	0.0356023	0.0864118	0.126483	0.021247	0.0303829	0.0412389	0.0493067	0.119902	0.142194	0.023894	0.0476851	0.0975573	0.0493067
PE(O-16:0/22:4) (µmol/L)	0.0942203	0.146967	0.237201	0.131078	0.201371	0.304403	0.0704816	0.139267	0.180619	0.10892	0.146208	0.38175	0.0938778	0.144779	0.224056	0.121239	0.182875	0.308411	0.109116	0.177259	0.262234	0.0533152	0.210259	0.340268	0.0809712	0.152032	0.21128	0.0849012	0.128597	0.234544	0.0975934	0.164246	0.247745	0.0812164	0.139945	0.262172	0.152313	0.226391	0.296641	0.13325	0.151145	0.235592	0.0983404	0.16945	0.283796	0.134477	0.173969	0.273419	0.0983404
PE(O-16:0/22:5) (µmol/L)	0.230979	0.310667	0.528394	0.197618	0.303113	0.4553	0.143747	0.226868	0.464548	0.156559	0.30318	0.654489	0.213296	0.299147	0.517607	0.17689	0.303113	0.467464	0.233085	0.339605	0.587202	0.335015	0.433234	0.785729	0.202328	0.311419	0.391594	0.241138	0.423058	0.475306	0.233085	0.330776	0.534747	0.247106	0.423058	0.489205	0.297466	0.360665	0.434819	0.210283	0.325892	0.392323	0.264608	0.435555	0.630657	0.257689	0.356668	0.417137	0.264608
PE(O-16:0/22:6) (µmol/L)	0.064332	0.0975258	0.158688	0.0487584	0.077693	0.12362	0.0841433	0.119156	0.145287	0.0373517	0.0824864	0.145199	0.0643877	0.102374	0.155709	0.0453086	0.0782876	0.125863	0.0815556	0.140528	0.20603	0.115593	0.202196	0.285744	0.0769098	0.135646	0.213357	0.0590028	0.125776	0.21374	0.078723	0.13946	0.20603	0.0788854	0.145685	0.255739	0.0583276	0.117191	0.202948	0.0500544	0.0721324	0.0956911	0.0710968	0.23357	0.278535	0.0541248	0.0908464	0.138506	0.0710968
PE(O-18:0/16:0) (µmol/L)	0.450604	0.554193	0.746874	0.421074	0.562891	0.773526	0.370192	0.49275	0.74017	0.419873	0.5223	0.661446	0.441942	0.545983	0.745318	0.428073	0.557455	0.751023	0.434651	0.631532	0.827556	0.427042	0.797743	0.927428	0.48045	0.550557	0.787084	0.455312	0.529216	0.647489	0.445633	0.588832	0.817295	0.451401	0.544471	0.765309	0.498766	0.545461	0.691822	0.403006	0.665936	0.999609	0.555912	0.671718	0.782373	0.490366	0.591556	0.699759	0.555912
PE(O-18:0/16:1) (µmol/L)	0.0334111	0.0494286	0.0719227	0.0319409	0.0435836	0.0653776	0.0230014	0.0344567	0.0581795	0.0413735	0.076648	0.125317	0.0295014	0.0474953	0.0690568	0.0329844	0.0461325	0.0841396	0.0387927	0.062627	0.102233	0.0458184	0.0927567	0.124483	0.0289574	0.0434764	0.0618626	0.0259869	0.054369	0.122082	0.0373675	0.055128	0.0982042	0.0297914	0.0632377	0.115035	0.050502	0.0665685	0.115435	0.0391188	0.0817674	0.223735	0.043493	0.0757783	0.0884452	0.0482196	0.0665685	0.148055	0.043493
PE(O-18:0/18:1) (µmol/L)	0.364863	0.497383	0.842762	0.327015	0.487316	0.702699	0.289815	0.360964	0.669172	0.361808	0.725443	1.09614	0.353536	0.473005	0.832157	0.331235	0.513319	0.780207	0.461029	0.649737	1.1908	0.452263	0.623559	1.03589	0.406937	0.522752	0.826002	0.427776	0.633286	0.959216	0.443169	0.618107	1.09348	0.450063	0.633286	0.881235	0.451787	0.87019	1.39775	0.398231	0.459226	0.952939	0.559779	0.80103	1.0747	0.440594	0.472194	1.33344	0.559779
PE(O-18:0/18:2) (µmol/L)	0.447265	0.590881	0.935645	0.509915	0.644355	0.773486	0.391055	0.510481	0.749527	0.558216	0.762178	1.18303	0.44133	0.588424	0.897465	0.52193	0.661094	0.870507	0.526289	0.721929	0.909993	0.398435	0.615424	1.18976	0.426678	0.61321	0.856491	0.561722	0.679209	0.966558	0.480273	0.67265	0.888183	0.556515	0.675453	0.976029	0.650305	0.733887	0.995628	0.437447	0.698142	1.13026	0.643909	0.792745	0.982772	0.489108	0.733887	0.953436	0.643909
PE(O-18:0/20:1) (µmol/L)	0.0195484	0.028925	0.0501513	0.0184566	0.0310541	0.0515796	0.0116296	0.0230503	0.0346002	0.0206025	0.0314237	0.0511736	0.0181854	0.0276789	0.0473966	0.0203466	0.0310541	0.0513294	0.0247218	0.0371094	0.055627	0.0225237	0.0325089	0.0553758	0.0164203	0.0338086	0.052697	0.0261858	0.0320158	0.0422451	0.0207885	0.0364719	0.0550134	0.0255917	0.0322385	0.0418248	0.0267669	0.042173	0.0748219	0.015873	0.0257588	0.0591762	0.0298304	0.0354009	0.0566385	0.0226686	0.0328565	0.0602199	0.0298304
PE(O-18:0/20:2) (µmol/L)	0.0172825	0.026279	0.0405035	0.0169413	0.0307329	0.042702	0.0104315	0.0150502	0.0372291	0.0196928	0.0256608	0.0567878	0.0150502	0.024911	0.0402722	0.0192357	0.030563	0.0440086	0.0203748	0.031575	0.0500297	0.0174869	0.0301676	0.0438426	0.0148389	0.0298327	0.0405709	0.0189052	0.0257716	0.040412	0.0199416	0.0312268	0.0486954	0.0189644	0.0284965	0.0402446	0.0275722	0.0366293	0.0528551	0.018266	0.0349598	0.0528193	0.0214471	0.0427162	0.0545578	0.0243771	0.0349598	0.0470797	0.0214471
PE(O-18:0/20:3) (µmol/L)	0.161427	0.256239	0.370665	0.173852	0.240137	0.360349	0.116243	0.208617	0.318858	0.180819	0.289358	0.318258	0.156792	0.252775	0.361215	0.174334	0.253477	0.351825	0.187366	0.263327	0.356242	0.2117	0.253432	0.610679	0.170177	0.228423	0.313205	0.212411	0.306919	0.372659	0.180858	0.25225	0.336558	0.21964	0.295848	0.385894	0.165228	0.23825	0.271286	0.113838	0.172343	0.536579	0.206602	0.263875	0.475635	0.146911	0.212218	0.304	0.206602
PE(O-18:0/20:4) (µmol/L)	0.333029	0.506433	0.679214	0.371381	0.54071	0.739796	0.347831	0.425706	0.607055	0.43331	0.606865	0.799801	0.337259	0.483614	0.676859	0.379962	0.573128	0.754152	0.445016	0.552455	0.896843	0.527756	0.656168	0.779132	0.351165	0.495035	0.662513	0.471696	0.548639	0.76468	0.418973	0.521568	0.79992	0.481468	0.609175	0.762566	0.54338	0.659527	0.959737	0.289108	0.457127	0.784595	0.492067	0.551689	0.793844	0.3993	0.574666	0.811652	0.492067
PE(O-18:0/20:5) (µmol/L)	0.0521904	0.0852077	0.15929	0.0396463	0.057072	0.10186	0.0634692	0.106058	0.198599	0.0401551	0.0592285	0.114391	0.0525898	0.0873486	0.163111	0.0405804	0.0588395	0.106058	0.0665198	0.114223	0.18633	0.0898276	0.24954	0.332225	0.0627841	0.119543	0.198976	0.0849012	0.126826	0.192366	0.0641649	0.115097	0.190113	0.0858232	0.131938	0.236205	0.0525065	0.0697627	0.199604	0.044286	0.0602365	0.0854293	0.0678705	0.158981	0.213	0.0498611	0.0672627	0.10833	0.0678705
PE(O-18:0/22:4) (µmol/L)	0.0848617	0.136145	0.222624	0.122255	0.165388	0.232219	0.0564505	0.0924571	0.145145	0.0986521	0.158047	0.348882	0.0782334	0.131938	0.209777	0.116866	0.162434	0.251203	0.0859671	0.130392	0.254534	0.0768651	0.132715	0.236539	0.0596537	0.130347	0.191248	0.0778547	0.119985	0.204749	0.0781792	0.130392	0.247917	0.07979	0.119985	0.211037	0.116419	0.238779	0.49942	0.0709008	0.121621	0.229549	0.0760414	0.117679	0.218989	0.101504	0.147557	0.39383	0.0760414
PE(O-18:0/22:5) (µmol/L)	0.124246	0.187496	0.274224	0.11703	0.15051	0.251832	0.106611	0.155709	0.204635	0.117132	0.255822	0.338327	0.118251	0.177874	0.261508	0.117516	0.169567	0.28577	0.140042	0.193704	0.271106	0.13245	0.266146	0.413346	0.099182	0.151403	0.20714	0.165159	0.218231	0.301855	0.13139	0.178987	0.264608	0.161357	0.224522	0.312207	0.169205	0.235242	0.267714	0.129458	0.254012	0.397752	0.218534	0.236339	0.328264	0.150653	0.235242	0.295633	0.218534
PE(O-18:0/22:6) (µmol/L)	0.0625296	0.0995754	0.155364	0.0457206	0.0693446	0.131618	0.0550173	0.131299	0.1661	0.0546088	0.0868064	0.130399	0.0622375	0.101316	0.154634	0.0484933	0.0816122	0.131481	0.0959169	0.138114	0.198736	0.109863	0.175107	0.236628	0.0703225	0.126671	0.172677	0.0918185	0.1612	0.210214	0.0830963	0.134803	0.186976	0.097628	0.1612	0.214862	0.089981	0.141726	0.225524	0.075438	0.10394	0.173057	0.110639	0.193704	0.26351	0.0812471	0.12717	0.212338	0.110639
PE(P-14:0/18:1) (µmol/L)	0.0224175	0.0351691	0.0573303	0.0139667	0.0274116	0.0339713	0.0138156	0.0238797	0.0448277	0.0163753	0.0344577	0.053785	0.0212695	0.0334449	0.0555884	0.0145376	0.0278521	0.0389004	0.0196535	0.0334217	0.0523716	0.0393096	0.0571812	0.106337	0.0179795	0.0305315	0.0504831	0.0277942	0.0396078	0.0579892	0.0196535	0.0319493	0.0515433	0.0306487	0.0422744	0.0676355	0.018444	0.0305	0.0486099	0.0203854	0.0320473	0.0366978	0.0296038	0.0337242	0.0760941	0.0193873	0.0320473	0.041639	0.0296038
PE(P-16:0/16:0) (µmol/L)	0.262101	0.348916	0.463598	0.242091	0.361215	0.443784	0.220791	0.321954	0.416428	0.266717	0.369704	0.526976	0.258624	0.340548	0.452794	0.250161	0.366765	0.469738	0.276994	0.408931	0.530317	0.295243	0.496998	0.681962	0.260052	0.377867	0.540355	0.342679	0.435857	0.536232	0.276994	0.406951	0.530685	0.330872	0.44718	0.54723	0.217937	0.28561	0.523803	0.276555	0.355995	0.499608	0.355009	0.401627	0.651541	0.236954	0.336622	0.505615	0.355009
PE(P-16:0/16:1) (µmol/L)	0.0356788	0.0481917	0.0881254	0.0311978	0.0521542	0.0767059	0.0221914	0.0449021	0.0920079	0.049521	0.063179	0.107932	0.0321715	0.0481917	0.0886293	0.0343613	0.0533979	0.0838485	0.0433426	0.0689612	0.111486	0.0512402	0.0730854	0.171544	0.0343853	0.0614123	0.0926183	0.0472654	0.0622807	0.0908688	0.0426866	0.0670289	0.109798	0.0480311	0.0622807	0.106391	0.0412309	0.0613093	0.072953	0.0314205	0.0633685	0.127057	0.0516506	0.0676357	0.0893696	0.0384926	0.0613093	0.0833061	0.0516506
PE(P-16:0/18:0) (µmol/L)	0.065775	0.0985797	0.143705	0.056745	0.0982723	0.128114	0.0584472	0.0854325	0.131077	0.0769762	0.114554	0.164388	0.0653317	0.0973232	0.142391	0.0650606	0.102304	0.149366	0.080768	0.127886	0.175182	0.0856011	0.155828	0.215942	0.0749854	0.109305	0.146286	0.079051	0.107763	0.143879	0.0802657	0.120068	0.166423	0.0805301	0.112729	0.171906	0.0800985	0.113025	0.159509	0.0597488	0.0963078	0.171257	0.119902	0.139654	0.20179	0.0762392	0.102874	0.162763	0.119902
PE(P-16:0/18:1) (µmol/L)	1.58601	2.09569	3.43888	1.24843	1.84923	2.76851	1.357	1.79742	3.12118	1.66302	2.2376	3.76844	1.52196	1.9999	3.41984	1.38121	1.91047	3.2828	1.91445	2.84204	4.67812	2.17586	3.11295	5.91308	1.59306	2.31962	3.62614	1.80616	2.46558	3.98873	1.79867	2.71119	4.10086	1.93178	2.46729	3.96673	1.76891	3.48925	6.97984	1.51223	1.94429	4.96729	1.80241	3.2197	4.69761	1.60755	2.24615	5.60268	1.80241
PE(P-16:0/18:2) (µmol/L)	3.11057	4.25296	5.87333	2.64988	3.46277	5.69216	2.47005	3.61233	5.26372	2.85231	3.92661	6.24865	3.09498	4.17544	5.66049	2.75667	3.52819	5.86417	3.46517	5.28875	6.67574	3.3803	4.86865	9.14355	2.84749	4.07348	6.32798	3.39151	4.43806	7.11039	3.39857	4.72374	6.65265	3.45619	4.43806	7.23831	4.08305	4.34079	5.39431	3.38029	4.07986	4.91625	2.50173	5.41112	9.38221	3.95102	4.33021	5.00231	2.50173
PE(P-16:0/18:3) (µmol/L)	0.0521211	0.0805165	0.129078	0.0415943	0.073197	0.107244	0.0447124	0.0651509	0.124592	0.0541564	0.0891427	0.132134	0.0511518	0.0785594	0.127355	0.0457821	0.0782334	0.115257	0.0628444	0.100616	0.14488	0.0978761	0.152993	0.200404	0.0426031	0.0935822	0.148263	0.0714921	0.101316	0.163111	0.0582309	0.0971884	0.14488	0.0777697	0.112105	0.172866	0.0732807	0.0992346	0.118193	0.0454263	0.0907281	0.173543	0.089184	0.109418	0.181612	0.0668945	0.0960116	0.12378	0.089184
PE(P-16:0/20:1) (µmol/L)	0.0740138	0.0959842	0.136403	0.0507809	0.0808801	0.129191	0.070492	0.0990244	0.114322	0.0591758	0.092602	0.13847	0.0734511	0.0963834	0.135929	0.0511518	0.0818955	0.131026	0.0781792	0.125254	0.176034	0.0544323	0.146406	0.166649	0.0742121	0.107614	0.140651	0.0959834	0.123958	0.161872	0.0781792	0.118497	0.162885	0.0927385	0.132947	0.162266	0.0598894	0.0877989	0.119732	0.100627	0.122464	0.137117	0.106132	0.116947	0.15051	0.0750977	0.108756	0.126416	0.106132
PE(P-16:0/20:2) (µmol/L)	0.048376	0.0695614	0.0936345	0.0415637	0.067355	0.092884	0.0329643	0.0609144	0.0890635	0.0405823	0.0598953	0.110008	0.0475282	0.0679646	0.0921372	0.0418662	0.0669361	0.0969193	0.0523716	0.0731463	0.107912	0.0813465	0.115018	0.143196	0.0457195	0.0677702	0.110358	0.0431328	0.0695372	0.106574	0.0509395	0.0717403	0.107912	0.0490922	0.0875911	0.112209	0.0616883	0.0779639	0.0910159	0.0520962	0.0693049	0.103834	0.0557041	0.0946619	0.156792	0.0573429	0.0750863	0.0933496	0.0557041
PE(P-16:0/20:3) (µmol/L)	0.675577	0.99511	1.46381	0.555082	0.801585	1.05847	0.471902	0.719431	1.23151	0.560577	0.746355	1.13916	0.652445	0.953251	1.38025	0.567199	0.789455	1.06801	0.770533	1.06063	1.50622	1.26683	1.70857	1.99122	0.648167	0.977405	1.43925	0.748943	1.15103	1.60206	0.749982	1.009	1.48445	0.787544	1.32678	1.81688	0.789404	0.945435	1.27809	0.644035	0.879606	1.18879	0.83969	1.68755	2.19608	0.741173	0.892211	1.24789	0.83969
PE(P-16:0/20:4) (µmol/L)	1.77151	2.75011	4.3762	1.56975	2.51739	4.25876	1.84285	2.21135	3.91228	1.27716	2.29258	4.84875	1.78872	2.55607	4.33769	1.55071	2.51042	4.4013	2.45876	3.35643	5.44876	3.05373	4.02162	7.9079	2.07977	3.16079	4.78866	2.16434	3.08	4.98616	2.38986	3.31481	5.0278	2.39145	3.21302	5.69276	2.0701	4.86667	8.39008	1.79038	2.81608	4.01374	2.01521	4.03041	5.75545	1.83077	3.28179	6.74209	2.01521
PE(P-16:0/20:5) (µmol/L)	0.0793666	0.199869	0.484238	0.0537781	0.09068	0.134891	0.0714065	0.214631	0.6837	0.0545303	0.137065	0.274202	0.0768361	0.203194	0.534376	0.0547472	0.0973232	0.165618	0.114461	0.290363	0.727454	0.311141	0.587258	1.13413	0.116608	0.340795	0.550735	0.112885	0.185814	0.498591	0.115978	0.299355	0.695406	0.126902	0.311851	0.641333	0.0902098	0.250308	0.585032	0.055957	0.0787571	0.11504	0.111718	0.411775	1.07024	0.0682885	0.125338	0.292436	0.111718
PE(P-16:0/22:4) (µmol/L)	1.07284	1.62499	2.44347	1.31763	1.96691	2.74928	0.982665	1.52936	2.26785	1.32183	1.7875	3.24443	1.07172	1.62442	2.4115	1.32402	1.90518	2.85785	1.13755	1.81747	2.70931	1.04253	1.65914	2.80431	0.906016	1.40105	1.87375	0.969914	1.63346	2.4879	1.04097	1.74343	2.57563	1.00149	1.63346	2.63187	1.73369	2.17025	2.81194	1.25266	1.47765	2.1705	0.935577	1.20074	2.2037	1.49455	1.77049	2.58789	0.935577
PE(P-16:0/22:5) (µmol/L)	0.821697	1.06664	1.65627	0.649383	1.0238	1.42865	0.630887	0.838526	1.60081	0.523219	1.12697	1.89892	0.784545	1.03665	1.65282	0.609597	1.0238	1.62217	0.859714	1.29498	2.07186	0.938044	1.51392	2.59105	0.651925	1.0208	1.58458	0.782373	1.17685	1.79618	0.833889	1.20158	1.80366	0.853816	1.20658	1.86718	1.03528	1.2669	1.77171	0.697484	1.03839	1.30664	0.947323	1.05039	1.52618	0.875791	1.19454	1.59846	0.947323
PE(P-16:0/22:6) (µmol/L)	0.389968	0.572931	0.913802	0.251877	0.397748	0.679237	0.348429	0.575915	0.852534	0.247546	0.389842	0.848056	0.389563	0.574321	0.891266	0.265895	0.395549	0.686308	0.484621	0.748943	1.09197	0.640305	1.21452	1.45587	0.42672	0.631988	1.06644	0.325771	0.694443	1.18421	0.484621	0.712483	1.0747	0.407404	0.773744	1.27415	0.413325	0.689395	0.852352	0.169223	0.467789	0.626427	0.395549	0.96857	1.72899	0.353371	0.605248	0.752986	0.395549
PE(P-16:1/18:1) (µmol/L)	0.0509491	0.0687702	0.107781	0.0444761	0.086505	0.10739	0.0377712	0.0527359	0.0826891	0.0504677	0.0700694	0.119748	0.0491702	0.067542	0.100407	0.0465501	0.0831539	0.112807	0.0545578	0.0767829	0.111486	0.0339655	0.085969	0.0983196	0.0420917	0.0698278	0.0952658	0.049822	0.0716409	0.105691	0.0514719	0.0747868	0.109418	0.0469611	0.0780168	0.102564	0.0809192	0.0941455	0.118977	0.0540717	0.0962256	0.126791	0.0493409	0.0672617	0.0954526	0.0770658	0.0941455	0.123554	0.0493409
PE(P-18:0/16:0) (µmol/L)	0.581474	0.736335	0.974969	0.49139	0.622406	0.811383	0.499737	0.656073	0.902874	0.622326	0.682986	0.826628	0.565629	0.729474	0.974631	0.531421	0.678739	0.820132	0.627605	0.818428	1.04241	0.765081	1.00056	1.26564	0.54715	0.672884	0.875945	0.66893	0.859118	1.0076	0.613837	0.757821	1.02238	0.689967	0.871111	1.03558	0.659378	0.732979	0.968737	0.534411	0.609887	0.717059	0.653803	0.859118	1.09652	0.578628	0.661096	0.834028	0.653803
PE(P-18:0/16:1) (µmol/L)	0.0525833	0.0882318	0.142885	0.0561588	0.0841396	0.13016	0.0553385	0.0680589	0.129821	0.0557141	0.119124	0.248958	0.0536205	0.085848	0.137922	0.0558201	0.102801	0.146293	0.0772098	0.111718	0.180858	0.104464	0.150417	0.212535	0.0514545	0.0895006	0.16297	0.0811046	0.12413	0.167233	0.0674484	0.10687	0.17337	0.0837449	0.130482	0.178344	0.0681814	0.110153	0.152865	0.0559408	0.0730178	0.244933	0.0983404	0.151767	0.165618	0.0652343	0.0861111	0.181648	0.0983404
PE(P-18:0/18:1) (µmol/L)	3.03023	3.89177	5.71576	2.76446	3.69079	4.93122	2.69342	3.13601	4.55272	2.98941	4.19938	5.94788	2.96479	3.83421	5.6175	2.84204	3.86088	5.32923	3.4772	4.92433	6.53836	4.07965	6.38835	8.41879	2.87857	3.81993	5.13147	3.6425	4.48444	6.10897	3.38212	4.50938	6.27636	3.72775	4.81631	6.3839	3.25944	4.75239	6.43145	3.11506	3.76306	6.55999	3.65008	4.85654	7.82412	3.13308	4.40033	6.55999	3.65008
PE(P-18:0/18:2) (µmol/L)	5.16205	6.67574	10.4772	4.95859	6.44387	9.81651	3.80116	5.92957	8.8404	5.4048	8.08882	11.541	5.02432	6.64343	9.84184	5.12634	6.90159	10.4972	6.10897	8.08321	11.1961	6.54256	8.87337	13.9636	4.05031	6.91633	9.58867	5.1086	7.57333	11.704	5.75944	7.59436	11.0496	5.45262	7.57333	11.9779	8.70109	9.4811	11.8143	5.53526	8.39112	12.4771	5.72362	10.1396	11.6797	6.96353	9.4811	11.7245	5.72362
PE(P-18:0/18:3) (µmol/L)	0.0888917	0.143035	0.199427	0.0870465	0.124648	0.170757	0.0931623	0.125602	0.219598	0.104895	0.147356	0.208639	0.0903036	0.141407	0.199841	0.0876518	0.137636	0.192767	0.118826	0.178863	0.230035	0.137828	0.251402	0.302502	0.0844949	0.136974	0.23548	0.118415	0.169802	0.222971	0.113356	0.163338	0.230035	0.120164	0.17277	0.251402	0.127222	0.171289	0.21519	0.141623	0.169645	0.482278	0.0943344	0.195052	0.282031	0.12994	0.169645	0.223152	0.0943344
PE(P-18:0/20:1) (µmol/L)	0.0669245	0.0971888	0.124087	0.0540328	0.0897421	0.126523	0.0689142	0.104816	0.139048	0.0658521	0.085591	0.12472	0.0678235	0.0982042	0.128597	0.0545578	0.0869258	0.125515	0.0654224	0.095585	0.156792	0.0821443	0.141177	0.202679	0.0708017	0.0913483	0.146481	0.096651	0.120736	0.163678	0.0667508	0.0951223	0.149677	0.0936027	0.121492	0.166917	0.0505175	0.0819867	0.12478	0.0816985	0.0970687	0.134114	0.0786684	0.146597	0.281836	0.0623702	0.0898691	0.111153	0.0786684
PE(P-18:0/20:2) (µmol/L)	0.0864758	0.11756	0.167989	0.0737079	0.11018	0.149215	0.062538	0.102374	0.147212	0.0827246	0.103122	0.178795	0.0829812	0.116543	0.163678	0.0789963	0.103158	0.150301	0.0990931	0.152611	0.192366	0.0747087	0.130177	0.26789	0.0887678	0.109229	0.162999	0.0988187	0.145282	0.232601	0.0917548	0.145081	0.190905	0.0979688	0.145282	0.240862	0.104574	0.141533	0.177321	0.0837003	0.128575	0.189389	0.136024	0.164132	0.248605	0.0967787	0.141533	0.184665	0.136024
PE(P-18:0/20:3) (µmol/L)	1.07414	1.54589	2.22179	1.04895	1.35184	1.93178	0.971339	1.31761	1.83375	0.9753	1.34067	2.19165	1.07024	1.50935	2.15985	1.04458	1.3481	1.98059	1.23879	1.58549	2.57563	1.62694	2.48467	3.61361	1.02555	1.43297	2.17078	1.36692	1.85308	2.55962	1.18832	1.5811	2.44177	1.42056	1.94656	2.59626	1.25914	1.40042	2.24237	1.20945	1.35942	2.49045	1.39178	2.54018	3.68823	1.24772	1.37593	2.2937	1.39178
PE(P-18:0/20:4) (µmol/L)	5.75945	7.64989	11.2331	5.28522	7.74319	10.3491	5.39182	7.12519	9.57293	5.40109	6.70316	10.6774	5.60972	7.61017	11.1961	5.32185	7.48461	10.3742	6.16426	9.1764	12.7191	11.1911	12.3142	16.5086	6.07203	7.9088	12.0039	6.22869	8.36246	12.3713	6.15999	8.8148	12.5788	6.52329	10.5044	13.1791	6.26019	9.3662	12.9044	4.59772	8.4624	9.39736	6.64804	10.1326	14.2998	5.83819	8.4624	11.237	6.64804
PE(P-18:0/20:5) (µmol/L)	0.305128	0.529244	1.19992	0.182689	0.26942	0.47547	0.375091	0.591696	2.19062	0.172468	0.302804	0.656414	0.310987	0.544849	1.20491	0.17689	0.285177	0.526654	0.399129	0.766803	1.72899	0.902119	1.92437	3.27619	0.431672	0.892089	1.49123	0.456576	0.79055	1.63232	0.406388	0.820132	1.55394	0.494217	0.984135	1.84351	0.269062	0.518817	1.47348	0.195654	0.258626	0.386679	0.176645	0.955235	2.44008	0.232095	0.357933	0.647744	0.176645
PE(P-18:0/22:4) (µmol/L)	0.705507	1.09881	1.78317	0.866634	1.29677	1.746	0.535563	1.18012	1.85849	0.842195	1.27344	2.26026	0.687737	1.10261	1.77883	0.852002	1.29677	1.82884	0.809402	1.09728	1.59099	0.574489	0.989115	1.79658	0.504404	0.972459	1.39051	0.554757	0.824692	1.76165	0.720929	1.08142	1.55394	0.562753	0.856739	1.75254	1.14039	1.48846	1.78897	0.934782	1.06402	1.5531	0.502059	0.856146	1.463	1.08363	1.25458	1.75459	0.502059
PE(P-18:0/22:5) (µmol/L)	0.732387	0.932663	1.33834	0.663114	0.955898	1.41471	0.674526	0.772137	1.16446	0.608856	1.16912	1.57828	0.730486	0.903708	1.33323	0.647041	1.06432	1.43687	0.792745	1.14546	1.57454	1.11685	1.44987	2.08252	0.585945	0.955263	1.27119	0.726446	1.11956	1.63119	0.765741	1.10414	1.4691	0.762035	1.26394	1.69948	0.901222	1.32473	1.53257	0.638795	0.693259	1.49609	0.891266	1.10568	1.50935	0.695782	1.11855	1.52199	0.891266
PE(P-18:0/22:6) (µmol/L)	0.607613	0.91031	1.45542	0.425263	0.604967	0.983863	0.547675	0.963214	1.4109	0.336669	0.801081	1.08363	0.599125	0.911888	1.45289	0.424821	0.710511	1.0302	0.781289	1.15743	1.7739	1.04191	1.48034	2.81433	0.636242	1.02522	1.40307	0.673116	1.12969	2.12863	0.713472	1.15423	1.69458	0.712112	1.27185	2.07542	0.78913	1.74731	3.53398	0.466226	0.555058	1.02771	0.63197	2.21442	2.67943	0.548073	1.03983	2.44386	0.63197
PE(P-18:1/16:0) (µmol/L)	0.510748	0.683241	1.18239	0.415081	0.66247	1.00733	0.51119	0.569563	0.89808	0.553972	0.872712	1.2256	0.511543	0.677798	1.09956	0.453737	0.698789	1.02735	0.579921	0.911256	1.41121	0.576209	0.721353	1.48447	0.548831	0.707078	1.11527	0.587609	0.759398	1.37547	0.576714	0.835625	1.32127	0.594407	0.759398	1.22957	0.596478	1.22155	2.10694	0.493171	0.66694	1.07444	0.638133	1.00621	1.84284	0.534196	0.788305	1.83266	0.638133
PE(P-18:1/16:1) (µmol/L)	0.034553	0.0592708	0.0982131	0.0419399	0.0650606	0.0938994	0.0310966	0.0606616	0.0784968	0.0315586	0.0890286	0.159584	0.0344567	0.0597022	0.0945963	0.0385514	0.0666583	0.110869	0.0465824	0.0757783	0.105911	0.0478114	0.0788358	0.116701	0.0391507	0.0592912	0.0962858	0.0402722	0.0738084	0.094008	0.0442226	0.0657862	0.103516	0.042815	0.0738084	0.0979082	0.0549009	0.086818	0.103513	0.0272748	0.0509505	0.103217	0.0496153	0.062888	0.0854917	0.0489883	0.071472	0.0987153	0.0496153
PE(P-18:1/18:0) (µmol/L)	0.0590647	0.0825243	0.10978	0.0477435	0.073962	0.101879	0.0521191	0.0781792	0.134245	0.0631581	0.0998871	0.124537	0.0583521	0.0818955	0.110409	0.0555114	0.0823509	0.118251	0.0741674	0.102588	0.129581	0.0635332	0.102566	0.166264	0.0550202	0.0904627	0.115477	0.0768361	0.0999207	0.131026	0.0656495	0.0971884	0.124907	0.0752456	0.0999207	0.133102	0.0637204	0.0988672	0.113163	0.0570689	0.0714311	0.181381	0.0497875	0.0821798	0.136875	0.0608743	0.090664	0.123432	0.0497875
PE(P-18:1/18:1) (µmol/L)	0.881487	1.22853	1.78006	0.822725	1.10798	1.63917	0.81025	1.0345	1.51764	0.828597	1.40167	1.9833	0.83969	1.18257	1.72779	0.829853	1.19576	1.69458	0.989607	1.42892	1.83392	0.978362	1.35043	2.26532	0.78194	1.04404	1.43322	1.00273	1.30218	1.81999	0.928471	1.3556	1.78748	1.0432	1.30218	1.83141	1.44614	1.46809	1.92843	0.843166	1.16667	1.95225	0.99995	1.36313	1.68288	1.26892	1.46249	1.9271	0.99995
PE(P-18:1/18:2) (µmol/L)	2.68455	3.91487	6.13557	2.44108	3.85553	6.26663	1.92853	3.08641	4.42462	2.6377	4.13075	7.22697	2.6334	3.76312	5.79548	2.469	3.86088	6.38607	2.98955	4.46583	6.4977	2.66393	4.07934	7.36591	2.31891	3.05836	5.42521	2.20982	3.04603	7.00278	2.8107	4.19866	6.23301	2.2268	3.04603	7.05166	5.14627	5.45648	7.18116	3.61811	3.86494	5.2853	1.36219	4.32868	6.19424	3.87499	5.21219	6.63637	1.36219
PE(P-18:1/18:3) (µmol/L)	0.0519559	0.0812739	0.122359	0.050326	0.0704102	0.112071	0.0405648	0.0659231	0.0825005	0.0414907	0.0806201	0.118745	0.051794	0.080099	0.118826	0.0471672	0.0757258	0.11312	0.0516148	0.0757783	0.110256	0.0816589	0.101838	0.112252	0.0538596	0.0926142	0.117725	0.0744248	0.107092	0.166193	0.0517222	0.0807121	0.110256	0.0797809	0.105472	0.140257	0.0497876	0.0786498	0.119491	0.0665331	0.0960184	0.112715	0.0750465	0.112417	0.153459	0.0665331	0.0873901	0.111928	0.0750465
PE(P-18:1/20:1) (µmol/L)	0.026908	0.0404574	0.0630845	0.0275258	0.0405804	0.0617813	0.0214363	0.0375232	0.0622719	0.0339695	0.0459587	0.0679059	0.0263497	0.0394981	0.0630626	0.0277942	0.0438867	0.0653317	0.0343613	0.0456554	0.0707527	0.0237059	0.0463597	0.071381	0.0382363	0.0512942	0.0749201	0.0305842	0.0432226	0.0582713	0.0365731	0.047331	0.0707527	0.0283397	0.0445611	0.0583521	0.0390109	0.0531604	0.066289	0.0480201	0.0548065	0.0763578	0.0320602	0.0552044	0.102445	0.0469633	0.0547491	0.0690232	0.0320602
PE(P-18:1/20:2) (µmol/L)	0.0316596	0.0480757	0.0795223	0.0384109	0.0531395	0.0722256	0.0175865	0.0272978	0.0726085	0.0335748	0.0617831	0.0846819	0.0284767	0.0475282	0.0765703	0.035895	0.053844	0.0815556	0.0355977	0.0601592	0.0837904	0.0485407	0.0597853	0.0870262	0.0355612	0.0560385	0.0844577	0.0331219	0.0500297	0.073197	0.0355977	0.0599926	0.0837904	0.0386067	0.0542561	0.0734771	0.0509606	0.0592008	0.078959	0.0243641	0.0568065	0.0672237	0.0485942	0.065604	0.131938	0.0454355	0.0584052	0.0708384	0.0485942
PE(P-18:1/20:3) (µmol/L)	0.721947	1.02523	1.55887	0.759926	1.05258	1.55448	0.530192	0.933633	1.21113	0.775256	1.06183	1.46341	0.685357	1.0076	1.45895	0.761506	1.05258	1.501	0.770533	1.04458	1.64824	0.926161	1.3091	1.67992	0.699438	0.979042	1.45299	0.759398	0.940127	1.76532	0.730486	1.02878	1.54963	0.760716	0.984817	1.67705	1.14115	1.34268	1.51811	0.918704	1.02633	1.5029	0.898088	1.18832	2.3342	0.999668	1.19977	1.49773	0.898088
PE(P-18:1/20:4) (µmol/L)	2.55925	3.67547	5.96647	2.38683	3.72161	5.77776	2.28416	2.83221	5.53261	1.82502	3.92785	7.10572	2.48101	3.6425	5.8156	2.29251	3.76051	6.22006	3.10572	4.43806	7.13507	3.85527	4.6761	9.26958	2.26448	3.85694	5.26272	2.26565	3.78667	6.00818	2.88972	4.26022	6.39936	2.58294	4.1466	6.07769	3.99921	7.14746	8.10853	2.7369	3.36127	5.14205	2.58637	3.04181	8.13943	2.95734	4.54868	8.06929	2.58637
PE(P-18:1/20:5) (µmol/L)	0.162243	0.283306	0.630185	0.11957	0.156034	0.237577	0.185378	0.436462	0.860989	0.0833723	0.223342	0.372209	0.167813	0.303744	0.659721	0.119487	0.172651	0.29462	0.195187	0.421302	0.880825	0.395987	0.779252	1.67629	0.252477	0.429295	0.824743	0.225458	0.361967	0.685832	0.208762	0.421302	0.867495	0.235235	0.426592	0.823556	0.165649	0.334392	0.702533	0.13885	0.171913	0.227184	0.167233	0.632847	1.00481	0.157657	0.187751	0.402562	0.167233
PE(P-18:1/22:4) (µmol/L)	0.130823	0.257998	0.415944	0.247747	0.34602	0.523719	0.107729	0.186717	0.307495	0.157665	0.37638	0.67731	0.128954	0.249468	0.384999	0.231154	0.356983	0.54334	0.134151	0.214185	0.396922	0.0968687	0.13386	0.24895	0.108233	0.153028	0.306872	0.0906172	0.186717	0.371885	0.129133	0.204182	0.3842	0.095269	0.184914	0.361219	0.326452	0.465331	0.556298	0.189644	0.223573	0.399983	0.0944653	0.167349	0.271859	0.212753	0.343851	0.555527	0.0944653
PE(P-18:1/22:5) (µmol/L)	0.375849	0.619291	0.860161	0.442889	0.599956	0.850468	0.277799	0.44133	0.679617	0.307855	0.731594	1.07289	0.370598	0.592517	0.833889	0.418682	0.619823	0.952591	0.389563	0.643017	0.908103	0.415737	0.525467	0.996879	0.326867	0.503269	0.824195	0.385266	0.559391	0.748424	0.363223	0.582338	0.891266	0.395001	0.554757	0.785417	0.648532	0.823136	0.92824	0.460797	0.527631	0.784831	0.27356	0.518325	0.778586	0.546434	0.66829	0.89663	0.27356
PE(P-18:1/22:6) (µmol/L)	0.279229	0.403724	0.641681	0.206758	0.275272	0.476475	0.270935	0.372401	0.592932	0.193471	0.30974	0.559705	0.273939	0.401905	0.621975	0.204465	0.292991	0.525925	0.34891	0.504151	0.751543	0.339393	0.50115	0.935203	0.30387	0.497578	0.618361	0.215227	0.401627	0.880825	0.345301	0.502407	0.734548	0.239788	0.431948	0.883581	0.358602	0.587258	0.877885	0.149006	0.282436	0.385626	0.265711	0.552455	1.0076	0.257779	0.40815	0.694532	0.265711
PE(P-18:2/18:2) (µmol/L)	0.202107	0.317537	0.438661	0.236634	0.334002	0.516453	0.164849	0.293397	0.40925	0.209576	0.316152	0.522654	0.200535	0.308625	0.437977	0.228763	0.322848	0.522654	0.190641	0.344107	0.48563	0.178076	0.25803	0.346797	0.173853	0.306465	0.46755	0.126125	0.228763	0.336558	0.180482	0.332616	0.477618	0.128078	0.230994	0.336558	0.389465	0.483076	0.773344	0.179358	0.309467	0.465781	0.0986818	0.359965	0.475306	0.275944	0.429526	0.600421	0.0986818
PE(P-18:2/20:4) (µmol/L)	0.154448	0.228051	0.321758	0.178926	0.255949	0.378002	0.122039	0.203476	0.306351	0.0990931	0.209143	0.40986	0.152822	0.227972	0.317522	0.162097	0.254887	0.380753	0.180482	0.237653	0.376293	0.233134	0.270455	0.361343	0.163613	0.240138	0.392275	0.151347	0.198324	0.301437	0.180482	0.23914	0.37891	0.167349	0.214482	0.32325	0.302408	0.322776	0.510882	0.153089	0.252461	0.375514	0.138785	0.215525	0.419845	0.25839	0.322776	0.389307	0.138785
PE(P-18:2/22:6) (µmol/L)	0.0110423	0.0195924	0.0303522	0.00832537	0.0173001	0.0285331	0.0125855	0.0210057	0.0354992	0.0167625	0.0218985	0.0367624	0.0112567	0.0196535	0.0306054	0.00969817	0.0196807	0.0331219	0.0160746	0.0262949	0.0369298	0.0201743	0.0238719	0.0423604	0.0132559	0.0235787	0.0368913	0.00969145	0.0160746	0.0289344	0.0150398	0.0250322	0.0369298	0.0111409	0.0198451	0.0300806	0.0131083	0.0260415	0.0404449	0.0142781	0.0296515	0.0485304	0.0191028	0.0471672	0.0542937	0.0138551	0.0282969	0.0409342	0.0191028
L_Carnitine (µmol/L)	15.2384	18.2516	20.7585	13.1474	16.266	19.201	14.9885	17.5117	21.7962	14.5452	18.2416	23.5372	15.2403	18.0003	20.7517	13.3345	16.856	19.6648	16.1265	19.988	23.1791	16.7715	21.4801	26.1648	15.0954	19.257	25.6017	17.9397	20.4275	26.7004	15.9428	19.782	23.775	17.5921	20.4275	26.5918	13.5746	15.8908	18.3315	11.0099	17.1584	28.1376	22.6127	25.1882	32.0579	13.0013	16.2668	18.9511	22.6127
AC2:0 (µmol/L)	2.57055	3.57279	4.69302	2.97989	4.25603	5.28046	2.81796	3.40052	4.88154	2.73371	4.42627	5.443	2.6666	3.5553	4.69113	2.97565	4.25603	5.35508	3.14097	4.24642	5.41687	2.97868	4.9902	5.33658	2.65692	3.86257	5.36499	3.46631	4.72285	6.60433	3.05231	4.16576	5.40427	3.41044	4.87126	6.14941	4.11107	4.80897	5.19178	4.4717	5.7873	11.0169	6.06079	7.68073	11.6885	4.40413	4.96515	5.762	6.06079
AC3:0 (µmol/L)	0.140392	0.181494	0.239968	0.112122	0.158046	0.180793	0.109764	0.175136	0.196546	0.107521	0.183348	0.243605	0.129348	0.180531	0.235123	0.112351	0.158632	0.190418	0.155147	0.206189	0.275779	0.20055	0.279351	0.34166	0.160742	0.25775	0.342797	0.161026	0.225157	0.321242	0.155147	0.220905	0.297914	0.165233	0.22523	0.321958	0.116152	0.14677	0.175144	0.129452	0.186348	0.404939	0.209744	0.274527	0.506536	0.129452	0.149316	0.220001	0.209744
AC4:0 (µmol/L)	0.0536553	0.074428	0.09887	0.0427478	0.0551771	0.0747701	0.0480755	0.0594313	0.093137	0.0454971	0.0741294	0.0920458	0.0534859	0.073989	0.0983161	0.0434192	0.0589108	0.0785162	0.0723173	0.0901972	0.11492	0.0787414	0.14042	0.230477	0.0655005	0.0976667	0.135479	0.0780534	0.101722	0.119424	0.0713829	0.0912267	0.12256	0.0787196	0.101722	0.180486	0.0576472	0.0664687	0.0975109	0.0845025	0.0967743	0.290725	0.119837	0.160999	0.251679	0.0635869	0.0830732	0.11196	0.119837
AC5:0 (µmol/L)	0.0321343	0.0440444	0.0643522	0.0241397	0.0345429	0.0449697	0.0263617	0.0475834	0.0653729	0.0289864	0.0439659	0.0657762	0.0319876	0.0441414	0.0643648	0.0250534	0.037006	0.0493237	0.0401564	0.0517931	0.0710717	0.0447412	0.051855	0.0634094	0.0369426	0.0491218	0.0766428	0.0366022	0.0538571	0.0784533	0.0393881	0.0492859	0.0738018	0.0378174	0.0538571	0.0748069	0.031041	0.0420288	0.0726511	0.043731	0.0528597	0.101487	0.0477584	0.0564556	0.109861	0.0369676	0.0457185	0.0768194	0.0477584
AC6:0 (µmol/L)	0.00916911	0.0122643	0.0185754	0.0108045	0.0138788	0.0190748	0.00778049	0.0113871	0.0167943	0.00871914	0.0145746	0.0195735	0.00840306	0.0117993	0.0177681	0.0107866	0.0141617	0.0191246	0.00838652	0.0139196	0.0193345	0.00881639	0.0167801	0.0244554	0.00806573	0.0129567	0.0200049	0.0110623	0.0192756	0.0232201	0.00831793	0.0138615	0.0193345	0.0109867	0.0192756	0.0230015	0.0117791	0.019335	0.0269519	0.015129	0.0205776	0.0390796	0.0205657	0.0276827	0.0472339	0.0133435	0.0200809	0.0293882	0.0205657
AC8:1 (µmol/L)	0.0456928	0.0762614	0.119529	0.046814	0.0939678	0.127099	0.0535299	0.09546	0.142584	0.0438229	0.0717777	0.142941	0.0491529	0.0786989	0.132226	0.0465607	0.0843772	0.12952	0.0672509	0.0957965	0.144809	0.0588985	0.081899	0.132588	0.0473976	0.0909446	0.161107	0.065213	0.116759	0.183781	0.0646584	0.0937744	0.145357	0.0654605	0.104975	0.163656	0.113883	0.213213	0.257687	0.13169	0.157882	0.203242	0.0735141	0.15592	0.226292	0.13169	0.181113	0.229593	0.0735141
AC8:0 (µmol/L)	0.0304715	0.0465953	0.0691423	0.0333462	0.0495219	0.0704118	0.0213245	0.0312076	0.0793919	0.0219675	0.0428245	0.0713986	0.0269395	0.0454343	0.0696164	0.0325799	0.0474811	0.069292	0.0300989	0.048724	0.074188	0.0267335	0.0525381	0.103072	0.0273384	0.0416712	0.0690758	0.0317959	0.0598612	0.0808318	0.0292439	0.0469658	0.0738925	0.0317611	0.0598612	0.086861	0.0428988	0.0769603	0.111392	0.0575681	0.0886684	0.112342	0.04552	0.0817933	0.104826	0.0575681	0.0849621	0.112342	0.04552
AC10:1 (µmol/L)	0.0311385	0.0519879	0.0980782	0.0524093	0.0711991	0.108817	0.0198271	0.0422071	0.0840354	0.0266435	0.0512649	0.0762095	0.0295819	0.0493887	0.0911276	0.0457152	0.0612197	0.0980302	0.0328442	0.0528253	0.0790227	0.0204242	0.0264951	0.0958798	0.0271974	0.0388639	0.0653306	0.0263822	0.0504375	0.0799908	0.0304053	0.0486895	0.0754936	0.0242318	0.0440594	0.0825509	0.0523738	0.0945136	0.198897	0.082375	0.119742	0.140387	0.052563	0.0588789	0.0845394	0.0659308	0.117462	0.181892	0.052563
AC10:0 (µmol/L)	0.0983507	0.150755	0.241837	0.11383	0.158937	0.237457	0.0825484	0.103192	0.227717	0.0832133	0.135696	0.218358	0.0933827	0.146182	0.241366	0.0984691	0.157061	0.225135	0.0966149	0.159974	0.260825	0.0713533	0.199105	0.40422	0.0752488	0.147254	0.246548	0.107847	0.21796	0.233322	0.0913156	0.155954	0.258765	0.10199	0.21796	0.275199	0.125361	0.275075	0.433327	0.245183	0.267966	0.319556	0.157475	0.228185	0.267249	0.197172	0.267966	0.326063	0.157475
AC12:0-OH (µmol/L)	0.00223997	0.00350067	0.00496594	0.002582	0.00386119	0.00536684	0.00152886	0.00330302	0.00440369	0.00226234	0.00309485	0.0042927	0.00219795	0.00350056	0.00478039	0.00256484	0.00358694	0.00470957	0.00232387	0.00397682	0.00544133	0.00232256	0.00459511	0.00651909	0.00182561	0.00333656	0.00590044	0.00270244	0.00365422	0.00545928	0.00211118	0.00387381	0.00551364	0.00272746	0.00365422	0.00569905	0.00306875	0.00669866	0.00911603	0.00727986	0.0082835	0.00939996	0.00416756	0.00554815	0.00673716	0.00525717	0.00788973	0.00931836	0.00416756
AC12:1 (µmol/L)	0.010948	0.0210241	0.0424687	0.0177524	0.0359034	0.0529266	0.00819761	0.0186231	0.0300995	0.01773	0.0267477	0.037234	0.0104333	0.020752	0.0394215	0.0177996	0.0306393	0.0515387	0.0112526	0.0235176	0.0400917	0.00669993	0.0139254	0.0395068	0.00841733	0.0203348	0.0319229	0.00872992	0.0247814	0.0396138	0.0111328	0.0230609	0.0359473	0.00819919	0.022728	0.039331	0.0206569	0.0605432	0.079381	0.0453761	0.0698229	0.10295	0.0317039	0.0411577	0.05272	0.0310598	0.0605432	0.0902736	0.0317039
AC12:0 (µmol/L)	0.0278992	0.0437868	0.0694141	0.0300605	0.0467894	0.0627549	0.0201276	0.0358191	0.0602304	0.0278839	0.0436436	0.0650521	0.0273866	0.0435495	0.0679549	0.0289672	0.0462296	0.0635245	0.0286103	0.0464086	0.0663742	0.0204113	0.0484075	0.117966	0.0191418	0.0416915	0.061387	0.025897	0.0461616	0.072128	0.024874	0.0464032	0.0638151	0.0256349	0.0461616	0.0733424	0.0397422	0.0795704	0.106823	0.0673925	0.100992	0.113954	0.0524541	0.0727347	0.0988424	0.0549736	0.087889	0.111729	0.0524541
AC14:0-OH (µmol/L)	0.00191647	0.0032176	0.00473289	0.0024947	0.00365844	0.00623806	0.00206642	0.0032273	0.00465354	0.00202461	0.00318308	0.00615911	0.00195159	0.00322351	0.00468734	0.00229156	0.00358218	0.00609249	0.00243414	0.00336672	0.00541846	0.00222198	0.0044951	0.00887776	0.00231311	0.00385386	0.00548595	0.00254394	0.00448713	0.00638392	0.00243414	0.00337338	0.00541846	0.00258504	0.00448713	0.00646788	0.00317642	0.00519008	0.00860136	0.00346377	0.00807507	0.0155032	0.00194482	0.00283876	0.00445934	0.00356613	0.00587437	0.00942532	0.00194482
AC14:1 (µmol/L)	0.0208104	0.0388402	0.0729924	0.027001	0.0467946	0.0851622	0.0150194	0.049636	0.0739251	0.0285961	0.0483396	0.101881	0.0194503	0.03917	0.0722856	0.027293	0.0474171	0.0880496	0.023492	0.0348527	0.0705573	0.0220869	0.0350637	0.117873	0.025403	0.0474843	0.0680906	0.028374	0.0454841	0.0956616	0.023847	0.0399449	0.0696932	0.0275567	0.0444664	0.099588	0.0486475	0.0789064	0.123236	0.0757299	0.149804	0.22198	0.0351947	0.0633839	0.0882555	0.05597	0.0915774	0.155276	0.0351947
AC14:0 (µmol/L)	0.0116006	0.0187809	0.0294232	0.0141834	0.019592	0.0276552	0.0115769	0.018922	0.0302742	0.0135811	0.0191132	0.03679	0.0116689	0.018922	0.0293606	0.0139495	0.0193682	0.0326515	0.012357	0.0205936	0.0320603	0.016512	0.0290576	0.0896897	0.0147666	0.0226232	0.030621	0.0169725	0.0328615	0.0491952	0.0128085	0.0210253	0.0314656	0.0177075	0.0323316	0.0514544	0.0174719	0.0273804	0.0376529	0.0233311	0.045843	0.0633499	0.0142291	0.0263019	0.0315696	0.0189086	0.0312896	0.0505962	0.0142291
AC14:2 (µmol/L)	0.00412558	0.00808957	0.0188137	0.00750646	0.0140293	0.023036	0.00239927	0.00799395	0.0204043	0.00515629	0.0125182	0.0228096	0.00385872	0.00808448	0.0183552	0.00711154	0.0139628	0.022586	0.00407792	0.008244	0.015675	0.00376755	0.00546315	0.0147726	0.00417078	0.00773661	0.0159562	0.00397199	0.00891171	0.0163296	0.00412808	0.00820576	0.0157641	0.00409368	0.00839775	0.0154325	0.016191	0.0219878	0.0358044	0.0222577	0.0376671	0.0583435	0.00652832	0.00866624	0.0206	0.0170585	0.0297747	0.0438564	0.00652832
AC16:0-OH (µmol/L)	0.00274989	0.00394427	0.00550506	0.00331532	0.00435482	0.00615558	0.00272465	0.00459033	0.00624158	0.00316249	0.00460755	0.0080102	0.00275169	0.00404438	0.00581132	0.00319438	0.00446382	0.00624745	0.00342508	0.00490761	0.0074816	0.00301929	0.00784386	0.0115512	0.00279655	0.00446008	0.0059082	0.00425517	0.00612874	0.0116586	0.00341186	0.00468827	0.00695309	0.00398676	0.00631208	0.0109721	0.00360178	0.0054615	0.00697296	0.00350644	0.0055669	0.0117323	0.00322785	0.0039191	0.00479932	0.0038627	0.0054615	0.00783318	0.00322785
AC16:1 (µmol/L)	0.0244858	0.0362131	0.0593183	0.0310095	0.0451052	0.0613193	0.0194938	0.043768	0.0716457	0.0346449	0.0521369	0.102318	0.0243726	0.0366005	0.0641596	0.0319407	0.0477707	0.0655447	0.0284399	0.0437398	0.0773685	0.0294537	0.0517923	0.114598	0.0295928	0.0396159	0.062504	0.0382535	0.0551513	0.103777	0.0285046	0.0419476	0.0708604	0.0375958	0.0524189	0.104706	0.0467688	0.0652163	0.0940078	0.0433192	0.0695326	0.137462	0.0251411	0.0536202	0.0880583	0.0482529	0.0695326	0.0995668	0.0251411
AC16:0 (µmol/L)	0.121196	0.168879	0.245317	0.141634	0.197209	0.239397	0.12597	0.219569	0.273318	0.146308	0.192381	0.281849	0.124558	0.17281	0.247234	0.145252	0.196097	0.249142	0.133947	0.203655	0.334873	0.155114	0.363577	0.482788	0.14306	0.198174	0.261369	0.193986	0.284257	0.545519	0.136784	0.199359	0.30068	0.185564	0.346886	0.538289	0.18178	0.213744	0.350027	0.171512	0.185504	0.354046	0.12129	0.170143	0.320524	0.178062	0.194028	0.336395	0.12129
AC18:2-OH (µmol/L)	0.00268464	0.00416655	0.00740406	0.00335187	0.00514001	0.00728817	0.0022542	0.00564227	0.00814996	0.00330804	0.00516124	0.00979592	0.00267988	0.00438221	0.00760203	0.00343021	0.00514001	0.00842641	0.00326771	0.00536662	0.00915954	0.0027097	0.00749303	0.0107436	0.002905	0.00439153	0.00616084	0.00420748	0.00578551	0.010651	0.00310935	0.00509555	0.00788993	0.00388736	0.0063265	0.010466	0.00545021	0.00889794	0.0114512	0.00514403	0.00806897	0.0172834	0.00317146	0.00528076	0.00626716	0.00575493	0.00826739	0.0127745	0.00317146
AC18:2 (µmol/L)	0.0479039	0.0911433	0.143255	0.0830428	0.129911	0.17032	0.0517468	0.0888215	0.13808	0.0646648	0.0989507	0.130981	0.0482734	0.0896027	0.141603	0.0755808	0.110169	0.161583	0.0610054	0.0922722	0.141485	0.0912323	0.115024	0.127121	0.0476154	0.0738667	0.114201	0.0564761	0.107687	0.174167	0.0587123	0.0879108	0.138657	0.0624568	0.111716	0.166759	0.101193	0.151071	0.176892	0.0721721	0.119668	0.159	0.0510822	0.059012	0.221385	0.0860786	0.141507	0.170247	0.0510822
AC18:1 (µmol/L)	0.208368	0.306379	0.490694	0.326989	0.416918	0.549058	0.160157	0.367177	0.543038	0.26202	0.360172	0.562022	0.20313	0.322249	0.503004	0.308252	0.405429	0.541113	0.249684	0.365693	0.558711	0.291378	0.485003	0.648704	0.238052	0.294618	0.417583	0.243159	0.51541	0.784609	0.245438	0.35113	0.507848	0.264704	0.509913	0.754393	0.248728	0.503692	0.664788	0.356017	0.456472	0.641058	0.201229	0.313104	0.523765	0.356017	0.471782	0.635524	0.201229
AC18:0 (µmol/L)	0.0639146	0.08555	0.138901	0.0651205	0.0972299	0.126777	0.0710846	0.106852	0.124156	0.0648447	0.103274	0.156894	0.0640724	0.0913606	0.134264	0.0653142	0.0997353	0.141553	0.0737465	0.102506	0.159314	0.0687047	0.185971	0.26588	0.0608626	0.0902098	0.145414	0.0848336	0.177459	0.309474	0.0695742	0.100498	0.15344	0.0778056	0.18086	0.285092	0.0707899	0.0934477	0.212373	0.0808073	0.113743	0.173135	0.0708887	0.089361	0.127928	0.081421	0.105	0.173135	0.0708887
AC20:4 (µmol/L)	0.00258979	0.0039752	0.00660788	0.00321834	0.00572414	0.00802087	0.00210847	0.00498776	0.00845151	0.00316955	0.00456992	0.00740091	0.0025577	0.00412068	0.0067255	0.00332248	0.00510031	0.00769288	0.00273882	0.00449415	0.00685984	0.00548516	0.00835338	0.011963	0.00312766	0.00424553	0.00646096	0.002971	0.00771181	0.0130056	0.00286607	0.00445728	0.00668335	0.00316902	0.00794978	0.0126967	0.00328342	0.00447014	0.00661434	0.00217833	0.00375847	0.00765088	0.00254888	0.00463522	0.00708369	0.00262114	0.00447014	0.00678665	0.00254888
AC20:3 (µmol/L)	0.00207784	0.003128	0.0048318	0.00295779	0.00451805	0.00604209	0.00156458	0.00433416	0.00550964	0.00243822	0.00399699	0.00560024	0.00206903	0.00317536	0.00514844	0.00291768	0.00434968	0.00565738	0.00225641	0.00341302	0.00519753	0.00394953	0.00586441	0.00842427	0.00219462	0.00331941	0.00477282	0.00231347	0.00507855	0.0097066	0.00225641	0.00335625	0.0050744	0.00242231	0.00530131	0.00862396	0.00257099	0.00380891	0.00404223	0.00191913	0.00329489	0.0064087	0.00207906	0.00360144	0.00601245	0.00204695	0.00380891	0.00470357	0.00207906
AC20:2 (µmol/L)	0.00422956	0.0063349	0.00961501	0.00594413	0.00825672	0.0111571	0.0037259	0.00910301	0.0112922	0.00672872	0.00765781	0.0116579	0.0042	0.00637211	0.0100133	0.00668609	0.00806952	0.0111983	0.00521318	0.00764558	0.0117137	0.00880354	0.0120193	0.0143704	0.00442956	0.00633963	0.00985782	0.00564632	0.00925452	0.0178885	0.00484705	0.00701084	0.0110025	0.00595831	0.0110077	0.0171523	0.00590148	0.0108064	0.0133572	0.00693611	0.0086292	0.0112912	0.00439446	0.00705137	0.010432	0.00713089	0.00985965	0.0123336	0.00439446
AC20:1 (µmol/L)	0.0109809	0.0159134	0.0250315	0.0126299	0.0165871	0.0223579	0.0103096	0.0197922	0.0307955	0.0141765	0.0179434	0.0304022	0.0110389	0.0160652	0.0259616	0.0137213	0.0166834	0.0258528	0.0131459	0.0199008	0.0310722	0.0156559	0.0273471	0.0419838	0.0130554	0.01859	0.024255	0.0148557	0.0250688	0.0683914	0.0131459	0.0190124	0.0286445	0.0150059	0.0250688	0.0563697	0.0161779	0.0267259	0.0423095	0.0146669	0.0233183	0.0270294	0.0120635	0.0180562	0.0229651	0.0159795	0.0254755	0.0301855	0.0120635
AC20:0 (µmol/L)	0.00247345	0.00391001	0.00579994	0.00237345	0.00346681	0.00476671	0.00299877	0.00394332	0.00552987	0.00226704	0.00412422	0.00539708	0.00250999	0.00392596	0.00575384	0.00236619	0.00353458	0.00526836	0.00283792	0.00417823	0.0065176	0.00287203	0.00653474	0.00839458	0.00213026	0.00356426	0.00515865	0.00353273	0.00598461	0.0121654	0.00276182	0.00375326	0.00593963	0.00350363	0.00606147	0.011515	0.00330711	0.00460232	0.0106056	0.00272288	0.00438912	0.00545852	0.0027329	0.00314726	0.0041564	0.00304058	0.00458096	0.00759548	0.0027329
[truncated: 2 more columns]

## Sheet: Validation Set
Z-score standardized median and interquartile range of the measured lipids in slow and rapid decliners of eGFR in the validation subset:
Lipids		All Slow-Decliners, n=283			All Rapid-Decliners, n=127		All Rapid vs Slow Decliners
		Percentiles			Percentiles
	25	50	75	25	50	75	p value	FDR
PC(18:0/20:5)	-0.65206	0.10696	0.9961	-0.95911	-0.53055	0.13559	6.6339e-07	0.00010747
CE(20:5)	-0.71404	0.16109	0.9368	-0.97787	-0.40011	0.17834	6.3256e-07	0.00010747
PC(16:0/22:6)	-0.61094	0.30132	0.92123	-1.01243	-0.38024	0.29456	4.8368e-06	0.00031342
CE(18:2)	-0.74102	-0.11329	0.54485	-0.39155	0.47077	0.90826	3.0032e-06	0.00031342
PE(P-18:1/20:5)	-0.72351	0.14332	0.99698	-0.93212	-0.52132	0.24858	4.378e-06	0.00031342
PE(P-18:0/20:5)	-0.74962	0.10813	0.99826	-1.02492	-0.45272	0.24623	6.1538e-06	0.00033231
PC(16:0/20:5)	-0.69327	0.13848	1.0024	-0.98363	-0.44255	0.31887	9.6309e-06	0.00044577
FFA(24:3)	-0.78506	-0.04543	0.65997	-0.30415	0.57004	0.9802	1.4089e-05	0.00054655
PE(O-18:0/22:4)	-0.88936	-0.12489	0.65429	-0.39903	0.32101	0.99525	1.5182e-05	0.00054655
FFA(18:2)	-0.82825	0.0009	0.60619	-0.33111	0.5403	0.96276	1.8672e-05	0.00060498
PE(18:0/20:5)	-0.63617	0.13131	1.00599	-0.83971	-0.40134	0.19213	2.3966e-05	0.00065511
PE(P-16:0/20:5)	-0.77437	0.15585	1.00826	-0.97829	-0.48726	0.26996	2.4263e-05	0.00065511
AC10:1	-0.81728	-0.072215	0.608985	-0.12872	0.41454	0.89434	2.6996e-05	0.00067283
LPC(20:5)	-0.56081	0.13172	0.90048	-0.85868	-0.16634	0.27484	3.1444e-05	0.0006792
SM(d18:1/24:1)	-0.56405	0.17829	0.91333	-0.86224	-0.36726	0.25951	3.0411e-05	0.0006792
DAG(16:0/18:2)	-0.66369	-0.14161	0.46584	-0.59728	0.29514	0.99406	4.9957e-05	0.0010021
AC12:1	-0.87695	-0.03449	0.630675	-0.18324	0.44267	0.89228	5.2582e-05	0.0010021
TAG58:7	-0.61331	0.08238	0.77138	-0.87946	-0.35196	0.25671	6.1045e-05	0.001021
TAG58:8	-0.61112	-0.00198	0.87578	-0.93122	-0.40152	0.09596	6.2645e-05	0.001021
PE(P-18:1/22:4)	-0.97628	-0.33741	0.71416	-0.56651	0.35292	1.04621	6.3027e-05	0.001021
FFA(18:0)	-0.47816	0.15365	0.82963	-0.86229	-0.20967	0.53424	7.4022e-05	0.0010576
FFA(24:1)	-0.34388	0.25102	0.7568	-0.88377	-0.21903	0.63786	7.4189e-05	0.0010576
PE(P-18:0/18:2)	-0.77186	-0.06876	0.5487	-0.36481	0.38581	0.99277	7.5077e-05	0.0010576
PC(18:1/20:5)	-0.57421	0.10641	0.81822	-0.83269	-0.22959	0.28606	0.00010424	0.0014073
TAG60:11	-0.65536	0.03373	0.90512	-1.01945	-0.36187	0.25251	0.00010998	0.0014253
TAG60:12	-0.62538	0.10993	0.93722	-0.99961	-0.28876	0.1782	0.00013313	0.001659
FFA(20:2)	-0.71899	-0.03789	0.65824	-0.40518	0.4732	0.85338	0.00020163	0.0023331
PC(18:0/22:6)	-0.63448	0.13174	0.83878	-0.89234	-0.28913	0.38289	0.00019654	0.0023331
PE(18:0/20:1)	-0.49294	0.06275	0.69743	-0.8485	-0.32486	0.35526	0.00027021	0.0030189
PC(16:0/20:1)	-0.69548	0.07107	0.77706	-0.87962	-0.26748	0.24136	0.00030936	0.0033411
PE(16:0/20:5)	-0.71361	0.18327	0.91656	-0.92874	-0.3692	0.39457	0.00035918	0.003754
PE(O-16:0/20:5)	-0.68645	0.172	0.99616	-0.849535	-0.358415	0.366022	0.00039242	0.0039732
FFA(16:0)	-0.56632	0.17159	0.86327	-0.89846	-0.41035	0.43554	0.00045318	0.0043546
PC(18:0/20:0)	-0.3571	0.20661	0.79422	-0.80738	-0.18101	0.3349	0.00047041	0.0043546
PC(18:1/20:2)	-0.82507	-0.12659	0.49499	-0.27417	0.21573	0.90117	0.00045944	0.0043546
TAG58:9	-0.61364	0.03255	0.75806	-0.96103	-0.32538	0.21167	0.00050101	0.0043872
TAG60:10	-0.66969	0.07449	0.88191	-0.96811	-0.27988	0.24959	0.00049355	0.0043872
PC(18:2/16:1)	-0.84056	-0.23163	0.65595	-0.33858	0.37662	0.92886	0.00054473	0.0044123
TAG56:7	-0.63874	0.01364	0.73066	-0.88355	-0.281	0.22745	0.00053467	0.0044123
CE(22:6)	-0.56739	0.17247	0.83139	-1.00368	-0.30038	0.46964	0.0005412	0.0044123
FFA(18:1)	-0.82931	0.06153	0.59774	-0.30916	0.38415	0.90356	0.00061152	0.0048325
FFA(24:2)	-0.76451	0.11926	0.60263	-0.37594	0.41479	0.97486	0.00063398	0.0048907
PC(16:1/18:2)	-0.79126	-0.21789	0.65067	-0.23023	0.37747	0.87418	0.00088854	0.006695
PC(18:2/20:5)	-0.56878	0.12915	0.93904	-0.76146	-0.18141	0.29427	0.00097566	0.0070248
AC2:0	-0.802905	-0.14234	0.465452	-0.53067	0.22857	0.83772	0.00097084	0.0070248
SM(d18:1/20:1)	-0.78865	-0.09002	0.60726	-0.39541	0.21448	0.91504	0.0011752	0.0080744
PC(18:1/18:2)	-0.92217	-0.26295	0.72332	-0.44456	0.27328	0.96942	0.0011923	0.0080744
PE(P-16:1/18:1)	-0.83071	-0.10269	0.52716	-0.25379	0.31881	0.93526	0.0011962	0.0080744
TAG56:8	-0.58255	0.02496	0.74319	-0.92346	-0.29795	0.29507	0.0012402	0.0082006
LPC(22:6)	-0.52747	0.20923	0.78694	-0.91521	-0.16339	0.53253	0.0013067	0.0084673
TAG56:9	-0.61714	0.0272	0.73141	-0.84726	-0.40189	0.31425	0.0013909	0.0088361
SM(d18:1/22:1)	-0.85089	-0.16907	0.64315	-0.42963	0.36746	0.92064	0.0014498	0.0089836
PC(18:1/22:4)	-0.87584	-0.14891	0.75642	-0.41709	0.40113	1.00925	0.0014695	0.0089836
TAG58:10	-0.59761	0.07877	0.77648	-0.87512	-0.35766	0.38552	0.0015134	0.0090804
PE(18:1/20:1)	-0.61463	0.09665	0.85275	-0.77161	-0.11763	0.36149	0.0017577	0.010355
L_Carnitine	-0.534135	0.21608	0.793063	-0.79319	-0.19852	0.46269	0.0018707	0.010824
AC12:0	-0.795813	-0.055555	0.667397	-0.39393	0.30578	0.83019	0.002131	0.012113
PC(16:0/22:5)	-0.5902	0.13749	0.831	-0.81492	-0.318	0.42869	0.0023239	0.012982
PE(O-16:0/22:6)	-0.5454	0.1492	0.81873	-0.85727	-0.1817	0.43887	0.0024627	0.013524
PE(P-18:0/22:6)	-0.69795	0.14648	0.85075	-0.99398	-0.28194	0.43432	0.0025302	0.013663
PE(P-16:0/22:6)	-0.61962	0.21353	0.89474	-0.94431	-0.21709	0.43487	0.0026447	0.014047
TAG58:6	-0.53663	0.11223	0.75844	-0.78913	-0.23237	0.56309	0.0029378	0.015179
AC8:1	-0.7202	-0.00722	0.55956	-0.34831	0.16953	1.01096	0.0029514	0.015179
FFA(20:0)	-0.52355	0.19157	0.79519	-0.76744	-0.04066	0.62466	0.0030408	0.015394
LPC(22:4)	-0.73345	0.05613	0.62563	-0.3407	0.29337	0.87959	0.0038645	0.019263
AC6:0	-0.633135	-0.075575	0.491208	-0.25702	0.21384	0.72706	0.0046204	0.022682
PE(P-18:2/18:2)	-0.70336	-0.06649	0.59738	-0.40552	0.2488	0.9137	0.0050345	0.024346
TAG54:8	-0.59222	-0.03724	0.73116	-0.88827	-0.30056	0.36664	0.0051132	0.024363
PE(16:0/22:4)	-0.88642	-0.01189	0.6309	-0.30626	0.27355	0.881	0.0052492	0.024648
PE(18:1/16:1)	-0.52171	0.10794	0.80071	-0.79689	-0.07618	0.44203	0.0053551	0.024787
AC3:0	-0.413413	0.169525	0.736823	-0.79108	-0.18261	0.31838	0.0062562	0.028549
AC8:0	-0.622982	-0.06046	0.472562	-0.2291	0.19987	0.65286	0.0066715	0.030022
DAG(20:0/20:0)	-0.47196	0.20063	0.67195	-0.8976	-0.16019	0.52407	0.0073088	0.032039
PE(P-18:1/18:3)	-0.71319	-0.0157	0.54235	-0.39245	0.17976	0.7088	0.0073176	0.032039
PE(O-18:0/18:2)	-0.73465	-0.07122	0.64083	-0.45598	0.1877	1.00676	0.0078587	0.033837
AC14:2	-0.833588	-0.091975	0.548482	-0.43421	0.16364	0.76929	0.007937	0.033837
PC(14:0/22:6)	-0.54812	0.19206	0.86389	-0.86122	-0.06195	0.44562	0.0089116	0.036728
PC(18:0/22:4)	-0.76947	-0.08892	0.63185	-0.42238	0.13157	0.8383	0.0091628	0.036728
PC(18:2/18:2)	-0.70458	-0.03385	0.60172	-0.35929	0.16221	0.83214	0.0092568	0.036728
DAG(18:1/18:2)	-0.7081	-0.10411	0.62315	-0.39026	0.35829	0.92895	0.0094087	0.036728
PE(14:0/20:4)	-0.4833	0.1639	0.71186	-0.9269	-0.11714	0.58766	0.009342	0.036728
PE(18:0/22:6)	-0.65161	0.02351	0.89797	-0.9803	-0.26103	0.55494	0.0089561	0.036728
PE(P-18:1/16:1)	-0.75146	-0.21216	0.55541	-0.55364	0.08364	0.88903	0.009284	0.036728
PE(P-16:0/20:4)	-0.54927	0.10708	0.78159	-0.93515	-0.19799	0.42049	0.0097697	0.037683
AC10:0	-0.691118	-0.06482	0.571222	-0.30372	0.175	0.80947	0.010059	0.038343
TAG54:7	-0.55997	-0.01377	0.65515	-0.80716	-0.28773	0.33006	0.010232	0.038549
PC(18:0/20:1)	-0.66783	0.03439	0.78782	-0.97608	-0.15926	0.59771	0.012371	0.046071
PE(P-16:0/22:4)	-0.84688	-0.07023	0.60012	-0.56422	0.27789	0.97025	0.012746	0.046927
PC(18:1/20:3)	-0.88044	-0.14451	0.61862	-0.6359	0.20862	0.91122	0.01319	0.048019
DAG(16:1/18:2)	-0.62159	0.05451	0.6663	-0.36985	0.26955	0.85829	0.013667	0.049202
PE(16:0/22:6)	-0.66031	0.20174	0.77827	-0.75749	-0.16775	0.54059	0.013828	0.049234
PE(18:0/22:4)	-0.85658	-0.05683	0.58708	-0.31541	0.19201	0.87293	0.014722	0.051846
PC(18:2/20:3)	-0.74591	0.01337	0.62735	-0.30515	0.20008	0.91458	0.017206	0.059887
TAG56:6	-0.57635	0.10467	0.80242	-0.81598	-0.11188	0.46046	0.017375	0.059887
SM(d18:1/18:1(9Z))	-0.81068	-0.05194	0.72432	-0.52024	0.31892	0.86133	0.018145	0.06124
PE(O-16:0/20:4)	-0.52935	0.13443	0.76312	-0.7769	-0.15523	0.61271	0.018022	0.06124
DAG(16:1/18:0)	-0.56756	0.04557	0.69858	-0.82092	0.02042	0.62906	0.021375	0.071397
PC(18:1/22:5)	-0.83587	-0.1741	0.77551	-0.55137	0.19988	0.9906	0.021807	0.072097
PE(O-16:0/20:3)	-0.42755	0.19738	0.74598	-0.86443	-0.04432	0.57533	0.023098	0.075593
PC(14:0/18:2)	-0.73679	-0.10491	0.45788	-0.53245	0.24025	0.88152	0.025424	0.082372
AC12:0-OH	-0.71409	0.00746	0.71366	-0.49398	0.24615	0.78836	0.027073	0.086849
PC(16:0/22:4)	-0.82235	0.02431	0.72421	-0.48289	0.26752	0.88891	0.028686	0.091119
PE(18:1/18:1)	-0.61188	0.0373	0.81142	-0.86892	-0.11126	0.38552	0.029279	0.092102
PE(O-16:0/22:4)	-0.72338	-0.03462	0.63383	-0.44349	0.20218	0.76511	0.02973	0.092621
PC(16:0/16:0)	-0.66885	-0.01461	0.78553	-0.90304	-0.22564	0.46493	0.030976	0.095584
PE(P-18:1/22:6)	-0.60419	0.02015	0.77391	-0.79401	-0.15311	0.39548	0.032114	0.098159
PC(18:2/20:1)	-0.58547	0.10137	0.74817	-0.90968	-0.12626	0.55298	0.033482	0.098621
TAG52:4	-0.6964	-0.09424	0.73692	-0.39384	0.28396	0.75686	0.032605	0.098621
PE(18:1/22:4)	-0.80504	-0.12315	0.70968	-0.50395	0.14129	0.80302	0.033333	0.098621
PC(16:0/18:1)	-0.60298	0.0282	0.75287	-0.91657	-0.08151	0.48925	0.035014	0.1022
SM(d18:1/20:0)	-0.61505	-0.07183	0.58594	-0.53327	0.12694	0.816	0.036606	0.1059
SM(d18:0/20:0)	-0.67612	-0.00524	0.73797	-0.71842	-0.29114	0.51306	0.036606	0.1059
PC(18:1/22:6)	-0.51328	0.07726	0.6758	-0.77609	-0.02762	0.62057	0.037866	0.10857
LPC(20:3)	-0.67015	0.07829	0.67709	-0.39333	0.14439	0.7022	0.038621	0.10881
PE(18:1/20:3)	-0.79912	-0.08113	0.62107	-0.44338	0.20212	0.8168	0.038321	0.10881
PE(18:1/20:4)	-0.75935	-0.03845	0.65277	-0.49623	0.04954	0.81682	0.043931	0.1227
CE(20:3)	-0.68889	0.0354	0.61317	-0.43156	0.16563	0.76991	0.045591	0.12518
PE(18:0/22:5)	-0.56595	0.00921	0.78466	-0.85748	-0.08841	0.53292	0.045315	0.12518
TAG52:3	-0.72845	0.05272	0.69636	-0.492	0.32189	0.86492	0.046606	0.12689
PC(14:0/20:5)	-0.69065	0.1602	0.83823	-0.77856	0.03565	0.43532	0.047251	0.12758
PC(16:0/18:2)	-0.58768	-0.01088	0.58084	-0.68805	0.3039	0.8477	0.047853	0.12814
PE(O-18:0/22:6)	-0.52417	0.1328	0.72019	-0.6688	-0.13601	0.5343	0.049366	0.1311
PC(18:1/18:3)	-0.72213	0.01203	0.6187	-0.55656	0.12521	0.86824	0.049946	0.13156
PE(P-18:1/18:2)	-0.61497	-0.10144	0.60275	-0.49174	0.04415	0.82969	0.053848	0.1407
TAG54:2	-0.71283	0.11879	0.77894	-0.83146	-0.20493	0.50683	0.054792	0.14202
TAG40:0	-0.56071	0.10986	0.74336	-0.70838	-0.12	0.49234	0.0569	0.14403
TAG42:2	-0.60542	0.09417	0.76243	-0.63308	-0.08427	0.53417	0.056628	0.14403
PE(P-18:0/22:4)	-0.80698	-0.14136	0.58636	-0.58655	0.21759	0.77743	0.056271	0.14403
LPC(20:0)	-0.60251	0.07098	0.75362	-0.81755	-0.04138	0.44448	0.058164	0.14609
TAG52:7	-0.65294	0.12633	0.79199	-0.74917	-0.13791	0.56778	0.059849	0.14916
AC18:2	-0.705295	0.001775	0.610625	-0.4136	0.23338	0.73925	0.060512	0.14966
TAG56:3	-0.50148	-0.02203	0.67026	-0.83882	-0.19988	0.53904	0.062062	0.15233
PC(16:0/20:4)	-0.69299	0.0584	0.78281	-0.81318	-0.19723	0.68621	0.063807	0.15428
PE(16:0/18:2)	-0.71196	-0.03235	0.61761	-0.55464	0.15421	0.83368	0.063444	0.15428
PC(18:0/22:5)	-0.60867	0.01318	0.6732	-0.75407	-0.20479	0.64826	0.066325	0.15873
PE(O-18:0/20:5)	-0.58413	0.1565	0.80588	-0.75261	-0.1605	0.54607	0.066627	0.15873
PC(18:1/20:4)	-0.80572	-0.10091	0.59948	-0.72027	0.12587	0.94569	0.068659	0.16238
AC14:1	-0.72063	-0.164485	0.591333	-0.55746	0.04733	0.75139	0.069638	0.1635
LPC(20:1)	-0.6537	0.02753	0.71943	-0.77576	-0.03477	0.44513	0.070895	0.16407
TAG58:3	-0.58645	-0.07616	0.5053	-0.75137	-0.18064	0.35072	0.070544	0.16407
SM(d18:0/14:0)	-0.57938	0.05156	0.74662	-0.63278	-0.06057	0.49	0.071619	0.16457
FFA(14:0)	-0.68239	-0.10708	0.56571	-0.7016	-0.02307	0.75876	0.073346	0.16735
TAG42:1	-0.55136	0.0993	0.76551	-0.75449	-0.1111	0.46131	0.078006	0.17674
PC(18:2/20:4)	-0.64137	-0.02488	0.63661	-0.41197	0.17769	0.67372	0.081401	0.18315
PE(18:1/18:2)	-0.75782	0.00112	0.65062	-0.56709	0.08062	0.8159	0.082929	0.1853
AC4:0	-0.553965	0.058565	0.689512	-0.83686	-0.17125	0.6065	0.090258	0.2003
TAG42:0	-0.49643	0.02195	0.68587	-0.80089	-0.10048	0.41123	0.093522	0.20613
PE(P-18:2/22:6)	-0.568815	0.107895	0.72487	-0.77213	0.01089	0.72867	0.095219	0.20845
FFA(24:0)	-0.56361	0.19211	0.65952	-0.52557	0.05769	0.46353	0.098283	0.21256
TAG52:6	-0.59258	-0.03402	0.64872	-0.71994	-0.15096	0.55042	0.098432	0.21256
PE(O-18:0/20:1)	-0.67139	0.04111	0.7085	-0.36825	0.21123	0.72266	0.099064	0.21256
AC5:0	-0.456178	0.100635	0.57548	-0.80533	-0.16219	0.5713	0.10175	0.21689
TAG44:2	-0.61329	0.00645	0.75161	-0.69621	-0.18573	0.5882	0.10252	0.21711
PC(18:2/22:6)	-0.42966	0.24842	0.71168	-0.74914	-0.07348	0.58461	0.10635	0.22231
PE(P-18:0/16:0)	-0.63815	0.06727	0.64323	-0.71885	-0.06411	0.43529	0.10604	0.22231
PC(16:0/18:0)	-0.65139	0.09804	0.77402	-0.85746	-0.04494	0.62839	0.1176	0.24424
DAG(18:2/22:4)	-0.57766	0.1316	0.72187	-0.96487	-0.00715	0.7228	0.12502	0.258
PC(18:1/20:1)	-0.7105	0.08568	0.66706	-0.68556	-0.08994	0.58864	0.12874	0.264
CE(18:0)	-0.81833	-0.10777	0.62037	-0.57801	0.11608	0.80212	0.13438	0.27042
PE(P-18:1/16:0)	-0.63103	-0.00714	0.66844	-0.76979	-0.13886	0.45773	0.13311	0.27042
AC16:1	-0.710333	-0.035195	0.645317	-0.5451	0.17268	0.82378	0.13399	0.27042
SM(d18:1/26:0)	-0.76259	-0.02113	0.68504	-0.52655	0.00636	0.69095	0.14305	0.28611
TAG50:3	-0.69799	-0.03932	0.74308	-0.54935	0.1927	0.75318	0.14596	0.28798
PE(18:1/22:6)	-0.55889	0.07262	0.72717	-0.67322	-0.01566	0.59747	0.14666	0.28798
PE(O-16:0/22:5)	-0.53331	0.15156	0.65436	-0.74847	-0.0747	0.62374	0.14575	0.28798
TAG56:5	-0.53593	0.13729	0.66359	-0.71098	-0.00114	0.60371	0.15178	0.29447
PE(P-18:1/18:1)	-0.75405	-0.045	0.48693	-0.61139	0.01258	0.87871	0.1514	0.29447
PE(P-16:0/18:1)	-0.62404	0.0562	0.79024	-0.89007	-0.10822	0.55519	0.15697	0.30273
TAG44:1	-0.58285	0.06174	0.74794	-0.70642	-0.07145	0.67939	0.16054	0.30779
FFA(20:1)	-0.71887	0.04001	0.63111	-0.48048	0.14467	0.71932	0.17594	0.33141
TAG52:5	-0.72559	-0.08693	0.66656	-0.54228	0.28649	0.76014	0.17557	0.33141
TAG56:2	-0.5836	0.03175	0.63667	-0.76908	-0.09762	0.4371	0.17502	0.33141
PE(16:0/16:0)	-0.58679	0.10407	0.78229	-0.6801	-0.07464	0.60814	0.17695	0.33141
AC20:3	-0.580888	-0.02756	0.642345	-0.49659	0.10498	0.80867	0.17908	0.33346
TAG54:3	-0.5802	0.04876	0.71472	-0.77346	-0.09527	0.58783	0.18193	0.33493
PE(O-16:0/18:1)	-0.57072	0.14845	0.82242	-0.80934	-0.07633	0.73442	0.18185	0.33493
LPC(20:2)	-0.69272	0.01868	0.64886	-0.64331	0.16844	0.76338	0.18702	0.34234
PE(P-16:0/20:3)	-0.5747	0.01613	0.70158	-0.8713	-0.01872	0.70309	0.19429	0.35365
CE(20:0)	-0.48762	0.06835	0.69991	-0.78168	-0.05974	0.58815	0.19784	0.3581
PC(18:2/18:3)	-0.60379	0.05773	0.5946	-0.48951	0.19897	0.77345	0.19979	0.35962
DAG(16:1/20:0)	-0.64408	0.13401	0.74575	-0.85259	0.05001	0.6589	0.203	0.3633
PE(O-16:0/18:2)	-0.65995	0.12327	0.69234	-0.7484	-0.0444	0.61818	0.20407	0.3633
TAG46:2	-0.63127	0.04772	0.70352	-0.79634	-0.08715	0.66593	0.2086	0.3662
PE(18:2/16:1)	-0.56474	0.07099	0.80025	-0.69249	-0.07831	0.65096	0.21023	0.3662
PE(18:2/18:2)	-0.68106	-0.01906	0.65527	-0.58316	-0.03557	0.76569	0.20808	0.3662
PE(P-18:1/20:4)	-0.57224	0.08631	0.73976	-0.84307	-0.07288	0.56802	0.21011	0.3662
PC(18:1/18:1)	-0.7724	-0.01927	0.60553	-0.59991	0.05391	0.84174	0.21387	0.37056
TAG44:3	-0.62886	0.11429	0.78342	-0.69988	-0.01575	0.57475	0.21542	0.37126
DAG(18:1/18:1)	-0.61351	0.08179	0.76141	-0.69275	0.02453	0.65214	0.2225	0.3796
PE(P-18:1/20:1)	-0.71921	-0.0079	0.63449	-0.55747	0.10275	0.73485	0.22261	0.3796
AC20:2	-0.701747	0.0124	0.601897	-0.5338	0.08734	0.79258	0.22454	0.38089
PE(18:2/20:4)	-0.50984	0.07914	0.64333	-0.45709	0.22674	0.70415	0.23089	0.38668
PE(P-18:1/20:3)	-0.74553	0.04195	0.63484	-0.57801	0.14378	0.8244	0.23153	0.38668
AC18:1	-0.689523	-0.01303	0.651745	-0.71199	0.19301	0.74458	0.23148	0.38668
TAG44:0	-0.57356	0.08334	0.69594	-0.72013	-0.01814	0.55938	0.24049	0.39958
TAG46:3	-0.69393	0.02041	0.69833	-0.69294	-0.18733	0.67294	0.24463	0.40439
PE(16:0/18:1)	-0.6492	0.01372	0.79542	-0.73536	-0.11837	0.59411	0.24902	0.40955
AC18:2-OH	-0.702285	0.01081	0.63382	-0.54422	0.11649	0.78224	0.2533	0.41449
TAG58:5	-0.6751	0.02037	0.70968	-0.65095	-0.02094	0.50915	0.26524	0.43184
LPC(16:0)	-0.58134	-0.00932	0.7604	-0.69843	-0.19604	0.48934	0.26898	0.43574
PE(P-18:1/22:5)	-0.70335	-0.15323	0.57856	-0.59364	0.05653	0.71006	0.27652	0.44574
PE(18:0/18:2)	-0.65567	0.0294	0.70081	-0.45628	0.12667	0.6877	0.28168	0.4518
PE(P-16:0/18:0)	-0.6431	-0.10462	0.49088	-0.5155	0.02089	0.76609	0.28937	0.46186
LPC(18:1)	-0.68903	-0.04207	0.59736	-0.61316	0.09476	0.78832	0.29128	0.4625
PC(16:1/18:1)	-0.79686	-0.04465	0.66642	-0.61187	0.08632	0.67566	0.29335	0.4625
PE(P-18:1/18:0)	-0.71426	-0.07586	0.56029	-0.71513	-0.02239	0.6316	0.29406	0.4625
PE(P-14:0/18:1)	-0.61291	-0.00469	0.63611	-0.4881	0.19088	0.7551	0.29897	0.46795
PE(O-18:0/16:0)	-0.64578	-0.02721	0.62568	-0.55567	0.13926	0.64366	0.30543	0.47372
PE(P-16:0/20:1)	-0.60132	-0.03667	0.68393	-0.68283	-0.0675	0.47057	0.30558	0.47372
SM(d18:1/26:1)	-0.68623	-0.01463	0.78294	-0.8854	-0.08221	0.68958	0.31059	0.47465
TAG48:4	-0.62289	0.01131	0.60838	-0.74555	-0.16402	0.415	0.31643	0.47465
TAG54:1	-0.6391	0.00112	0.71444	-0.75967	-0.10528	0.69742	0.30956	0.47465
TAG56:10	-0.67212	0.10821	0.68394	-0.35278	0.03057	0.75229	0.30961	0.47465
CE(18:3)	-0.63759	-0.07028	0.57379	-0.66883	0.00744	0.65166	0.31491	0.47465
PE(O-18:0/22:5)	-0.69965	0.04929	0.6323	-0.63667	0.11102	0.74058	0.31437	0.47465
AC14:0	-0.757162	-0.16493	0.533992	-0.68671	-0.04081	0.68416	0.31635	0.47465
TAG46:1	-0.61467	0.07216	0.72393	-0.72221	-0.07731	0.80091	0.32478	0.48493
LPC(14:0)	-0.61798	-0.01008	0.71938	-0.7301	-0.0364	0.61651	0.33567	0.49888
TAG46:4	-0.64812	0.03875	0.70447	-0.69422	-0.01907	0.4497	0.34504	0.51047
PE(18:0/18:0)	-0.69867	-0.01222	0.73146	-0.73008	-0.23205	0.60555	0.34769	0.51205
FFA(20:4)	-0.54279	0.09515	0.67628	-0.76662	-0.05923	0.43042	0.36123	0.52959
SM(d18:1/24:0)	-0.58433	0.00125	0.6493	-0.6408	0.09612	0.62928	0.36568	0.5313
PE(16:0/20:2)	-0.5904	0.02871	0.6575	-0.86799	-0.04218	0.7221	0.36535	0.5313
PE(P-16:0/22:5)	-0.57388	0.07516	0.65386	-0.71998	-0.05314	0.69201	0.37194	0.53799
AC16:0-OH	-0.709878	0.070485	0.648927	-0.61991	0.16705	0.76426	0.37474	0.53962
PE(O-18:0/20:2)	-0.62832	0.01928	0.76903	-0.53509	0.13284	0.76788	0.37838	0.54245
PC(18:0/18:1)	-0.61159	0.01997	0.73119	-0.94903	-0.07922	0.69902	0.38475	0.54675
PC(18:0/20:4)	-0.67422	-0.01373	0.57225	-0.7744	-0.05791	0.51168	0.38402	0.54675
TAG54:6	-0.58168	-0.10518	0.66436	-0.76742	-0.07195	0.54316	0.39173	0.55423
PE(18:0/20:4)	-0.66053	0.10368	0.77804	-0.71758	-0.00619	0.57762	0.39733	0.55971
PE(P-18:1/20:2)	-0.72289	-0.01602	0.58243	-0.74869	0.14196	0.75242	0.40141	0.56302
PC(18:0/20:2)	-0.81083	0.01598	0.66451	-0.70274	0.06682	0.86105	0.4083	0.56702
PE(16:0/18:3)	-0.74758	-0.0214	0.6579	-0.58747	0.07335	0.75178	0.40816	0.56702
PE(16:0/20:3)	-0.75132	-0.01761	0.66168	-0.56971	0.0447	0.7559	0.40952	0.56702
PE(O-18:0/20:4)	-0.78582	-0.10403	0.72412	-0.6809	0.09412	0.72959	0.41797	0.57627
PE(18:0/18:1)	-0.68017	-0.11492	0.65033	-0.68406	-0.22502	0.56551	0.42122	0.57829
TAG52:8	-0.7073	0.04007	0.71428	-0.63951	0.09344	0.87952	0.42555	0.57932
PE(16:0/22:5)	-0.66607	0.02757	0.69922	-0.57223	-0.04594	0.50994	0.42437	0.57932
PE(P-18:0/16:1)	-0.67334	-0.07863	0.54522	-0.55233	-0.0196	0.60724	0.43196	0.58559
LPC(18:2)	-0.77386	-0.02446	0.74882	-0.59246	0.10089	0.69992	0.43619	0.58886
TAG52:1	-0.65653	0.01736	0.79731	-0.60457	-0.03419	0.56528	0.44908	0.60375
TAG56:4	-0.56899	0.06212	0.70498	-0.77217	0.00802	0.52762	0.45182	0.60491
PC(14:0/20:4)	-0.59174	0.02713	0.62079	-0.41982	0.09589	0.73776	0.45454	0.60606
PC(16:0/16:1)	-0.66122	-0.07998	0.5165	-0.75957	-0.18678	0.49936	0.45809	0.60673
PE(18:0/20:2)	-0.70344	-0.02852	0.79296	-0.88057	-0.19349	0.73771	0.45879	0.60673
PE(18:0/20:3)	-0.7987	0.16609	0.75644	-0.86596	0.1149	0.7047	0.47157	0.61635
PE(18:1/22:5)	-0.65822	0.06504	0.66454	-0.69229	0.1465	0.72859	0.47178	0.61635
PE(P-18:2/20:4)	-0.6563	-0.05084	0.5348	-0.54397	0.00893	0.69991	0.4699	0.61635
TAG50:5	-0.62228	-0.00711	0.66517	-0.59542	-0.07828	0.53512	0.47579	0.61695
TAG50:6	-0.53481	0.10097	0.6297	-0.71411	-0.075	0.56699	0.47604	0.61695
TAG50:4	-0.72873	-0.03691	0.65019	-0.56163	0.08932	0.67528	0.48397	0.62473
TAG46:0	-0.64304	-0.03431	0.72183	-0.71827	-0.00044	0.67346	0.49143	0.62686
TAG48:5	-0.61477	-0.0424	0.66612	-0.60008	-0.14696	0.49254	0.48771	0.62686
PE(O-18:0/18:1)	-0.6968	0.00724	0.63287	-0.53542	0.06063	0.76959	0.49134	0.62686
SM(d18:1/16:0)	-0.68768	-0.1493	0.53562	-0.75446	-0.14642	0.59801	0.49445	0.62824
PC(18:0/18:2)	-0.57519	-0.03875	0.58273	-0.50729	0.05501	0.58651	0.49978	0.63253
PC(14:0/18:3)	-0.57682	0.13236	0.63379	-0.53379	0.18477	0.78054	0.50337	0.63459
PE(P-16:0/18:2)	-0.55472	0.00632	0.67297	-0.53894	0.11866	0.80002	0.50577	0.63515
TAG52:0	-0.63448	-0.04506	0.74877	-0.8095	-0.11228	0.63757	0.5184	0.6485
PC(14:0/20:3)	-0.57838	0.01333	0.62931	-0.44862	0.13624	0.67022	0.54052	0.67196
TAG54:4	-0.58849	0.0684	0.68822	-0.59923	0.08326	0.70311	0.54337	0.67196
PE(P-18:0/22:5)	-0.64971	-0.01883	0.67604	-0.55939	0.03345	0.63436	0.5417	0.67196
PE(P-18:0/20:4)	-0.68402	0.1014	0.76395	-0.6951	-0.13968	0.64486	0.5613	0.69149
PE(P-18:0/18:3)	-0.69374	-0.03516	0.53953	-0.56589	0.06525	0.73057	0.57003	0.69817
AC14:0-OH	-0.66695	-0.18163	0.531485	-0.64317	-0.15851	0.62507	0.57103	0.69817
PC(18:0/20:3)	-0.65311	0.0299	0.62077	-0.63958	-0.11986	0.59886	0.59151	0.71245
TAG48:0	-0.63411	-0.03897	0.69806	-0.7853	-0.08499	0.7498	0.58952	0.71245
TAG54:5	-0.67362	-0.05228	0.75649	-0.68225	0.06927	0.66288	0.58931	0.71245
PE(18:1/20:2)	-0.63793	-0.01089	0.58433	-0.69971	0.15795	0.72749	0.59011	0.71245
TAG56:1	-0.56697	0.05851	0.64229	-0.62136	0.00818	0.59585	0.59393	0.71272
TAG48:2	-0.6785	0.01302	0.70107	-0.7042	0.02409	0.74225	0.62023	0.74153
TAG48:1	-0.66736	0.03322	0.6892	-0.76621	-0.01992	0.7125	0.642	0.76473
PE(P-16:0/18:3)	-0.53295	0.02386	0.59101	-0.71356	-0.10723	0.68352	0.6462	0.76692
LPC(20:4)	-0.6845	0.04814	0.74374	-0.51356	-0.04835	0.68136	0.64979	0.76836
SM(d18:0/24:0)	-0.55216	-0.00243	0.59159	-0.59577	-0.01188	0.67251	0.65478	0.77145
LPC(18:3)	-0.7111	0.0558	0.59025	-0.42891	0.06511	0.6004	0.67336	0.7901
TAG50:0	-0.69792	-0.10042	0.79506	-0.7146	-0.09302	0.70309	0.67549	0.7901
PE(P-16:0/16:0)	-0.67628	-0.10635	0.54067	-0.65041	-0.13591	0.59564	0.68946	0.80354
PE(18:0/18:3)	-0.60876	-0.00284	0.58297	-0.58845	0.00066	0.74826	0.70314	0.81655
PE(P-18:0/20:1)	-0.61718	0.02677	0.6347	-0.79034	0.03923	0.58464	0.70641	0.81742
PE(16:0/16:1)	-0.69959	-0.19229	0.44693	-0.60368	-0.05372	0.68347	0.71206	0.81746
PE(P-18:0/20:3)	-0.66428	-0.08601	0.75583	-0.72849	0.0267	0.70335	0.70952	0.81746
AC16:0	-0.638635	-0.0383	0.711078	-0.72108	0.18523	0.65609	0.71402	0.81746
PC(16:0/20:3)	-0.68723	0.0501	0.72502	-0.65729	0.00067	0.50687	0.72199	0.82368
SM(d18:1/22:0)	-0.63908	0.06	0.70625	-0.55637	0.04381	0.70177	0.73513	0.83573
CE(16:0)	-0.72944	-0.06385	0.58768	-0.77598	-0.04088	0.63209	0.74973	0.84934
TAG48:3	-0.67542	0.02754	0.70297	-0.69634	-0.08419	0.62376	0.75266	0.8497
TAG52:2	-0.64202	0.11282	0.64845	-0.5027	-0.01223	0.45978	0.762	0.85725
PE(18:2/20:1)	-0.64097	0.08085	0.71015	-0.57271	0.08836	0.49946	0.76895	0.86208
PE(P-16:0/20:2)	-0.65978	-0.10128	0.48588	-0.51006	0.06929	0.56701	0.77849	0.86976
TAG50:1	-0.60125	-0.01472	0.59997	-0.68934	0.01987	0.69483	0.78387	0.8722
PE(P-18:0/18:1)	-0.70015	0.00619	0.77009	-0.7149	0.01437	0.68575	0.78875	0.8722
AC20:4	-0.64906	-0.041295	0.690625	-0.50062	0.01156	0.69269	0.78646	0.8722
LPC(16:1)	-0.6829	-0.02499	0.5484	-0.56425	-0.05359	0.49206	0.79146	0.87222
PC(16:0/14:0)	-0.71959	-0.03408	0.63649	-0.59825	-0.06567	0.75703	0.79731	0.87569
PC(18:2/20:2)	-0.60453	0.06808	0.62383	-0.48129	0.06967	0.67305	0.80515	0.88132
SM(d18:1/18:0)	-0.69874	-0.16222	0.54069	-0.73767	-0.10869	0.81939	0.81912	0.89358
TAG50:2	-0.56325	0.04632	0.60751	-0.63936	0.1177	0.7101	0.82598	0.89383
DAG(18:0/22:6)	-0.73035	0.17129	0.68411	-0.62165	0.21169	0.70412	0.82762	0.89383
PE(P-16:0/16:1)	-0.61342	-0.10398	0.55964	-0.57249	-0.02959	0.40123	0.82246	0.89383
PE(18:1/18:3)	-0.65281	-0.03343	0.67182	-0.4645	-0.09033	0.60447	0.84806	0.91286
PC(14:0/18:1)	-0.72418	-0.03931	0.73026	-0.7019	-0.07665	0.71864	0.85836	0.91785
PE(P-18:0/20:2)	-0.72548	-0.0625	0.74126	-0.61105	0.07605	0.60956	0.8556	0.91785
PC(18:0/18:3)	-0.63201	0.05041	0.60605	-0.77715	0.03325	0.60767	0.87031	0.92757
PE(16:0/20:4)	-0.73485	0.02096	0.70631	-0.72125	-0.06569	0.73571	0.8863	0.94151
PE(O-16:0/18:3)	-0.6032	0.15076	0.66171	-0.65498	0.05402	0.66993	0.8898	0.94214
PC(16:0/20:2)	-0.70926	-0.10665	0.71213	-0.78253	-0.23482	0.75727	0.90691	0.95713
AC18:0	-0.68036	0.06434	0.77385	-0.49815	0.06241	0.69423	0.9203	0.96811
DAG(16:0/18:1)	-0.66817	-0.02207	0.67006	-0.75522	-0.02127	0.68495	0.94772	0.99373
LPC(18:0)	-0.68133	0.05075	0.64559	-0.64585	0.00476	0.70167	0.97575	0.99647
LPC(22:5)	-0.65269	0.08743	0.67882	-0.51829	-0.02402	0.73171	0.96787	0.99647
PC(14:0/14:0)	-0.63166	0.0887	0.69268	-0.58323	0.03951	0.78679	0.9715	0.99647
PC(14:0/22:5)	-0.6527	0.06149	0.8417	-0.52314	0.15037	0.6292	0.98069	0.99647
PC(16:0/18:3)	-0.6728	-0.00512	0.68857	-0.67702	0.01648	0.73948	0.9815	0.99647
PC(18:0/16:1)	-0.59588	-0.05272	0.59544	-0.51619	-0.04979	0.45161	0.95448	0.99647
TAG54:0	-0.66538	0.10255	0.67128	-0.81339	0.10723	0.82218	0.99339	0.99647
TAG58:2	-0.65743	-0.08791	0.51396	-0.54103	-0.05111	0.49424	0.98479	0.99647
CE(16:1)	-0.67325	-0.09406	0.57002	-0.67213	-0.21992	0.526	0.9648	0.99647
CE(18:1)	-0.71125	-0.0168	0.48766	-0.68049	-0.01815	0.63627	0.96703	0.99647
CE(20:4)	-0.70016	-0.00024	0.66581	-0.73814	0.05586	0.54137	0.99261	0.99647
PE(O-18:0/16:1)	-0.59942	0.03559	0.64431	-0.6131	0.01217	0.63645	0.98936	0.99647
PE(O-18:0/20:3)	-0.67979	0.05097	0.65769	-0.61679	0.03548	0.6479	0.97064	0.99647
AC20:0	-0.710535	0.024045	0.692122	-0.65225	-0.00746	0.61049	0.98307	0.99647
AC20:1	-0.631145	0.029545	0.66467	-0.58346	-0.05654	0.66536	0.99861	0.99861

## Sheet: Validation set stratified
Median and interquartile range of plasma concentration of the measured lipids (µmol/L) in slow and rapid decliners of eGFR in the validation subset:
Lipids		eGFR >90 mL/min, Non-albuminuric, Slow-Decliners, n=114			eGFR >90 mL/min, Non-albuminuric, Fast-Decliners, n=56			eGFR >90 mL/min, Albuminuric, Slow-Decliners, n=28			eGFR >90 mL/min, Albuminuric, Fast-Decliners, n=30			eGFR >90 mL/min, All Slow-Decliners, n=142			eGFR >90 mL/min, All Fast-Decliners, n=86			eGFR 60-90 mL/min, Non-albuminuric, Slow-Decliners, n=98			eGFR 60-90 mL/min, Non-albuminuric, Fast-Decliners, n=8			eGFR 60-90 mL/min, Albuminuric, Slow-Decliners, n=31			eGFR 60-90 mL/min, Albuminuric, Fast-Decliners, n=21			eGFR 60-90 mL/min, All Slow-Decliners, n=129			eGFR 60-90 mL/min, All Fast-Decliners, n=29			eGFR <60 mL/min, Non-albuminuric, Slow-Decliners, n=7			eGFR <60 mL/min, Albuminuric, Slow-Decliners, n=5			eGFR <60 mL/min, Albuminuric, Fast-Decliners, n=12			eGFR <60 mL/min, All Slow-Decliners, n=12
		Percentiles			Percentiles			Percentiles			Percentiles			Percentiles			Percentiles			Percentiles			Percentiles			Percentiles			Percentiles			Percentiles			Percentiles			Percentiles			Percentiles			Percentiles			Percentiles
	25	50	75	25	50	75	25	50	75	25	50	75	25	50	75	25	50	75	25	50	75	25	50	75	25	50	75	25	50	75	25	50	75	25	50	75	25	50	75	25	50	75	25	50	75	25	50	75	25
FFA(14:0) µmol/L	14.8622	20.8079	28.217	18.4484	24.8631	33.126	15.2999	23.063	27.956	18.4023	25.9065	33.7307	15.0515	21.2393	28.1796	18.4551	25.5102	33.3147	17.8496	23.8533	36.1624	18.6891	22.1588	31.6338	14.8298	25.5323	28.9314	15.8985	20.6961	44.2316	17.1838	23.8783	34.6569	17.2557	21.571	35.0568	15.4318	24.6617	35.2658	13.9358	22.1644	26.6882	26.8848	46.1127	75.2944	14.4619	23.413	28.4257	26.8848
FFA(16:0) µmol/L	417.966	485.061	560.818	452.42	522.301	630.95	431.371	531.542	583.784	477.878	502.905	631.289	419.5	489.6	571.743	461.126	516.075	630.974	431.573	492.556	610.943	416.558	525.337	588.426	418.406	481.533	606.681	409.134	461.91	623.227	427.563	490.17	608.086	409.134	499.23	603.556	414.17	480.998	680.854	436.447	483.788	541.881	485.478	616.638	700.081	429.011	482.393	566.207	485.478
FFA(18:0) µmol/L	1170.4	1393.36	1702.12	1196.68	1545.74	1816.74	1204.87	1494.02	1688.73	1230.87	1443.87	1607.99	1180.01	1434.71	1693.37	1229.79	1470.11	1697.94	1160.33	1341.95	1684.32	1267.52	1376.44	1901.01	1112.34	1388.52	1774.32	1090.44	1356.09	1664.37	1132.61	1346.29	1693.31	1160.31	1356.09	1664.37	1127.59	1465.85	1576.02	1099.56	1510.07	1945.4	1220.41	1335.42	1460.59	1139.48	1487.96	1796.52	1220.41
FFA(18:1) µmol/L	176.741	359.537	550.387	293.953	474.355	760.58	193.889	308.014	551.121	322.905	512.476	804.003	181.307	351.482	549.304	296.273	491.446	766.777	195.895	409.681	736.832	175.699	298.864	593.388	109.158	334.496	544.213	158.423	300.772	742.59	175.823	393.233	658.374	167.643	300.772	635.936	239.916	387.387	890.26	159.713	346.468	510.058	447.547	901.796	1461.42	193.067	366.927	731.624	447.547
FFA(18:2) µmol/L	62.5733	119.422	203.955	112.201	191.702	278.415	69.7011	103.79	151.86	118.498	214.819	261.449	66.2156	114.366	185.427	112.654	195.842	274.949	64.6412	123.165	238.184	55.1536	88.3268	202.829	40.5243	93.7585	141.371	43.6874	94.9129	212.134	57.2167	105.662	227.961	45.7876	94.9129	209.111	60.0347	127.668	291.681	71.3451	182.754	230.46	172.089	223.967	472.499	69.9794	155.211	279.193	172.089
FFA(20:0) µmol/L	12.7719	15.0741	18.4664	12.8348	17.7318	19.6701	13.1705	16.3215	19.7922	12.9275	14.8852	16.9416	12.9294	15.4794	18.5309	12.8956	16.07	19.5021	13.0035	15.2055	18.3638	14.6666	15.2915	23.1519	12.2977	15.7486	20.3866	13.2052	15.8678	18.1936	12.7828	15.3326	19.0154	13.566	15.5766	18.1936	12.4435	17.4349	17.7916	12.5116	19.2433	21.2024	12.8907	14.2442	15.7893	12.712	17.613	20.2885	12.8907
FFA(20:1) µmol/L	2.61214	4.72699	7.43578	3.07671	4.89473	8.42947	3.09439	6.26345	7.98568	4.84531	6.32916	9.39922	2.62408	5.11835	7.55327	3.74621	5.54319	8.82731	3.11503	5.08556	8.85839	2.94749	5.5769	7.62744	2.10626	7.05879	9.56123	3.11553	3.59495	13.2429	3.04207	5.55726	9.05992	3.11553	5.38817	10.7819	3.65236	5.62257	13.0698	2.36844	3.13116	4.5808	6.89078	16.0474	24.5591	2.76166	4.49895	7.79914	6.89078
FFA(20:2) µmol/L	2.01693	3.40377	5.22777	3.21298	4.69655	7.59515	2.40118	3.31079	5.17506	3.22979	5.38669	6.95661	2.08108	3.40377	5.18959	3.22679	4.78415	7.09384	2.0484	3.91507	6.57118	1.54906	2.70371	5.4779	1.85543	3.68577	5.6136	2.00357	2.7247	7.96857	2.03463	3.78873	6.1837	2.00357	2.7247	7.86268	1.68075	4.16036	8.88289	1.78097	3.79369	5.73107	5.09028	9.67809	15.0053	1.78683	3.96227	6.88424	5.09028
FFA(20:4) µmol/L	3.76374	5.01823	6.37047	3.69268	4.91243	6.49425	3.93549	5.14061	6.97716	4.33198	5.40865	8.27383	3.84783	5.01823	6.42104	4.02403	5.15918	7.18196	3.89186	5.53817	7.48774	4.00263	4.71269	7.03662	4.12796	5.44713	7.30523	4.6359	5.5015	6.94653	3.93093	5.51694	7.43787	4.3905	5.45931	6.94653	2.3895	4.86655	9.14617	3.32494	3.85293	5.14983	4.86318	6.35824	12.3602	3.10769	3.93349	6.32434	4.86318
FFA(24:0) µmol/L	8.1425	12.001	17.2096	7.86056	14.9788	16.9319	11.0511	14.5804	18.1087	8.84431	11.8577	16.8321	8.26498	12.3859	17.2514	8.6536	13.1963	16.7993	8.58877	11.7285	16.5328	11.287	14.4675	17.1733	9.72133	13.9513	18.3091	10.1183	16.4513	18.8348	8.96336	11.8746	17.3737	10.6634	15.8083	18.7479	7.26138	9.22996	13.8528	6.78058	14.1966	17.7868	7.34218	10.7298	13.5851	7.28537	11.1083	14.1385	7.34218
FFA(24:1) µmol/L	30.0858	35.5724	42.26	31.7358	38.9901	44.605	31.5619	39.4535	44.9892	31.4291	36.7619	42.0169	30.6402	36.1982	42.5244	31.6692	37.5193	43.237	30.6624	35.9146	41.5068	35.6589	37.4929	50.6446	29.4184	33.9516	44.5907	27.9806	34.836	43.7642	30.319	35.7759	42.6423	28.2843	35.9009	43.7642	27.6266	38.2525	44.291	29.7511	34.4849	48.5848	31.5475	34.8606	38.922	28.9498	36.6772	44.0671	31.5475
FFA(24:2) µmol/L	4.20788	8.70401	13.4796	7.20761	11.4816	17.5746	5.1302	8.49521	13.8701	7.88151	13.2179	19.7914	4.3351	8.70401	13.6613	7.27567	12.1286	18.2191	4.66814	10.0029	17.0779	4.75521	7.3985	14.6746	2.75964	8.35201	13.4965	4.12764	7.49803	19.2571	4.5027	8.67533	15.4001	4.19935	7.49803	15.9385	5.37718	10.0423	23.0603	4.27576	8.01849	12.4902	11.3616	21.1681	29.7791	4.78968	9.03038	18.167	11.3616
FFA(24:3) µmol/L	1.30902	2.4157	4.16219	2.41286	4.05281	5.87832	1.63559	2.05417	3.54872	2.55591	4.54555	5.86338	1.3671	2.39064	4.0696	2.41683	4.1061	5.8331	1.35123	2.53038	5.10431	1.1702	2.04309	4.07624	0.859533	1.90972	2.51756	0.955107	1.97775	4.61861	1.26122	2.14311	4.74682	0.984403	1.99698	4.5301	1.17781	2.37225	6.39748	1.52499	3.74005	4.35783	3.64192	4.95421	8.49309	1.4319	3.05615	5.87856	3.64192
LPC(14:0) µmol/L	0.219076	0.319978	0.485759	0.207735	0.253783	0.323582	0.229838	0.312703	0.507349	0.192973	0.296148	0.471301	0.221613	0.319978	0.495417	0.202979	0.256307	0.374638	0.254285	0.365332	0.47017	0.378523	0.432273	0.452095	0.290372	0.36381	0.711189	0.282609	0.459309	0.543109	0.257558	0.36381	0.472439	0.290887	0.444968	0.531372	0.155248	0.214499	0.470679	0.179612	0.266664	0.351329	0.329122	0.392371	0.569994	0.165304	0.242762	0.384874	0.329122
LPC(16:0) µmol/L	75.399	94.6043	123.084	64.1637	77.9839	93.7359	80.2919	102	119.065	71.8051	91.3066	117.247	75.9156	95.6644	122.875	70.0403	78.8029	102.685	83.5142	101.474	118.343	84.4433	103.388	138.249	82.5972	109.3	132.541	101.748	116.405	139.25	83.3004	101.676	120.995	98.5252	113.696	139.25	56.0112	87.5274	103.153	60.1155	65.791	73.4244	101.392	129.969	138.57	58.1931	70.994	88.1978	101.392
LPC(16:1) µmol/L	1.61886	2.0609	2.5006	1.52318	1.78706	2.15917	1.53678	2.06629	2.58314	1.62064	2.19705	2.76558	1.57788	2.0609	2.51883	1.5443	1.90416	2.37808	1.71641	2.09214	2.67681	1.88553	2.32319	2.52605	1.55511	2.25058	3.35058	1.89374	2.24393	2.76801	1.70792	2.14912	2.79534	1.89374	2.25164	2.62957	1.38314	2.19931	2.25199	1.41711	1.7186	2.09756	1.94291	2.43123	2.87895	1.39839	1.84151	2.2248	1.94291
LPC(18:0) µmol/L	37.8954	45.8134	58.4633	29.9397	38.9803	46.7833	36.4742	46.2181	56.2363	35.6829	46.4537	58.5762	37.8954	45.8134	56.6649	34.6677	41.4028	50.6285	39.4994	50.3675	55.5056	44.1262	50.0482	68.8309	43.0842	51.3784	60.4023	44.8005	56.3917	62.2373	40.1322	50.5091	56.8821	44.8005	53.0457	62.2373	25.6135	44.0648	57.9278	30.4793	35.1117	43.2512	45.784	58.5401	75.9527	29.3733	36.7632	47.7747	45.784
LPC(18:1) µmol/L	29.2851	35.7316	41.7586	24.3122	30.6445	35.748	25.8214	30.0838	38.4153	28.8008	37.5251	42.9826	28.2911	34.0281	41.2907	27.205	31.6696	38.0195	30.4107	36.0297	44.2481	27.3816	29.283	41.9401	28.3446	34.1407	49.9555	37.0508	41.4659	54.9607	29.3778	35.9284	45.4134	29.283	40.8698	48.3219	24.5532	32.7869	42.5427	20.5549	28.1244	33.5124	35.3911	39.4265	44.9571	22.4239	28.6844	37.3159	35.3911
LPC(18:2) µmol/L	30.3306	36.7642	46.3445	27.4958	33.4946	38.3418	24.4316	30.5999	38.6446	25.9854	35.3977	51.8872	28.5974	35.3239	44.1768	27.1566	34.0026	40.3239	28.4672	37.263	48.1556	24.3725	31.0723	44.9256	25.0502	32.4929	44.9509	30.5616	42.9726	48.4244	27.2576	36.7261	46.6878	28.253	37.689	47.5587	22.1674	28.9055	40.8183	19.2715	32.3531	35.5528	30.7802	36.8777	53.188	22.2415	30.6293	35.8225	30.7802
LPC(18:3) µmol/L	0.234933	0.325174	0.405831	0.189515	0.251542	0.355879	0.186104	0.285785	0.40828	0.213856	0.254874	0.45608	0.22425	0.318765	0.405831	0.20089	0.251889	0.375229	0.242082	0.332727	0.465129	0.234591	0.334684	0.446562	0.22229	0.388794	0.470186	0.304172	0.388175	0.471186	0.234567	0.338625	0.46739	0.274788	0.359343	0.444	0.127338	0.194352	0.415836	0.170868	0.262876	0.288221	0.35616	0.444299	0.574145	0.147337	0.228614	0.364584	0.35616
LPC(20:0) µmol/L	0.22099	0.28678	0.408415	0.1638	0.22645	0.305393	0.230962	0.29296	0.385015	0.241102	0.306795	0.380365	0.228315	0.289883	0.400094	0.167695	0.257146	0.327458	0.242069	0.299248	0.385708	0.197382	0.319468	0.449247	0.259253	0.345047	0.404028	0.264649	0.355305	0.423996	0.24415	0.30124	0.386888	0.257971	0.355305	0.423996	0.107154	0.216741	0.36863	0.114744	0.214461	0.310506	0.25067	0.299363	0.438204	0.111235	0.215601	0.326334	0.25067
LPC(20:1) µmol/L	0.387869	0.531512	0.695289	0.278764	0.3734	0.511267	0.393404	0.603237	0.774884	0.411208	0.52777	0.724702	0.387869	0.538118	0.699018	0.293687	0.448182	0.555411	0.402884	0.552502	0.727806	0.420005	0.538668	0.71892	0.460527	0.688202	0.909618	0.577635	0.69383	0.868835	0.410229	0.578093	0.770999	0.495797	0.659982	0.842219	0.382416	0.5494	0.66992	0.161295	0.313642	0.528673	0.508015	0.783507	1.01636	0.250277	0.42994	0.618485	0.508015
LPC(20:2) µmol/L	0.3478	0.411265	0.536655	0.275909	0.360931	0.448568	0.296571	0.35962	0.480475	0.339475	0.414232	0.584743	0.323688	0.404163	0.52655	0.286904	0.381067	0.484857	0.334749	0.445898	0.548778	0.28789	0.319694	0.452106	0.352977	0.432408	0.559901	0.414661	0.507117	0.640544	0.341632	0.442215	0.550945	0.326739	0.478365	0.586796	0.213247	0.32218	0.515922	0.223133	0.335035	0.458575	0.432917	0.516817	0.761997	0.216213	0.328607	0.482314	0.432917
LPC(20:3) µmol/L	1.4019	1.7847	2.37205	1.17837	1.62146	1.93698	1.14826	1.41891	1.99576	1.47277	1.74504	2.55767	1.35474	1.75293	2.26172	1.31169	1.65168	2.06686	1.3726	1.8272	2.3839	1.36143	1.59287	1.69702	1.23308	1.74015	2.3739	1.65437	2.11903	2.79685	1.34086	1.8162	2.37641	1.49038	1.81023	2.43832	0.83523	1.10664	1.3021	1.11445	1.77165	1.99439	1.42817	2.17196	3.01185	0.962806	1.1726	1.77349	1.42817
LPC(20:4) µmol/L	1.43301	1.76715	2.29963	1.24524	1.62325	1.94563	1.22232	1.49732	1.93555	1.41014	1.74072	2.30554	1.39221	1.74015	2.20237	1.26612	1.67666	1.99668	1.40563	1.86389	2.30647	1.31915	1.67765	1.82751	1.37271	1.74337	2.62793	1.76288	2.00255	2.54941	1.40179	1.83311	2.40427	1.65937	1.86548	2.38014	0.670128	1.37956	1.74746	1.17142	1.49154	2.21535	1.68709	2.05829	2.46208	1.07979	1.43555	1.72796	1.68709
LPC(20:5) µmol/L	0.0184277	0.0368835	0.083031	0.0106262	0.0193368	0.0387327	0.020198	0.054349	0.0948853	0.0134126	0.0225979	0.0502284	0.0189645	0.0424395	0.0845243	0.0120621	0.0198986	0.0393125	0.0223083	0.0577645	0.107377	0.0421911	0.0948817	0.137878	0.0196142	0.0693024	0.189482	0.0302625	0.0641439	0.112085	0.0220134	0.0610245	0.12929	0.0376209	0.0641439	0.12598	0.008294	0.0295596	0.0908974	0.00883827	0.0121416	0.0280575	0.0272364	0.0534143	0.071127	0.00846815	0.0167479	0.0556779	0.0272364
LPC(22:4) µmol/L	0.0604001	0.0858112	0.132536	0.0504337	0.0838986	0.125852	0.0373923	0.068324	0.101851	0.0699361	0.10507	0.128486	0.0579986	0.0830436	0.126289	0.0585892	0.0933753	0.127625	0.0533495	0.0737658	0.113381	0.0549891	0.0721801	0.087329	0.0479696	0.0894406	0.13173	0.0517602	0.10727	0.154048	0.0521124	0.0748836	0.119081	0.052868	0.0867437	0.133757	0.0520418	0.0771143	0.111446	0.0283564	0.077358	0.0990156	0.0487809	0.114321	0.12606	0.0367903	0.0772362	0.107254	0.0487809
LPC(22:5) µmol/L	0.10706	0.144704	0.18526	0.0745164	0.115143	0.155471	0.072393	0.108787	0.142332	0.096233	0.133574	0.170222	0.0978853	0.136049	0.183017	0.085993	0.121235	0.157595	0.101584	0.137778	0.192488	0.0916263	0.137402	0.163016	0.100211	0.159213	0.218946	0.134528	0.184164	0.249444	0.101261	0.141942	0.194062	0.123844	0.165332	0.203673	0.0924875	0.111724	0.162607	0.0743601	0.0948732	0.132396	0.113128	0.179835	0.291747	0.0811695	0.104788	0.145467	0.113128
LPC(22:6) µmol/L	0.0407293	0.0665567	0.102036	0.0274014	0.0359489	0.0586343	0.0379286	0.06692	0.11442	0.029109	0.0513281	0.0956398	0.0398005	0.0665567	0.102894	0.0289568	0.0370773	0.064304	0.0591843	0.0863068	0.126501	0.0722393	0.101454	0.116627	0.0519892	0.0789882	0.128299	0.0663779	0.0934239	0.142829	0.059071	0.0857712	0.12663	0.0663779	0.0967924	0.118549	0.0327591	0.0452117	0.122627	0.0245582	0.034252	0.0768448	0.0548812	0.107782	0.134	0.0277409	0.0428184	0.103824	0.0548812
SM(d18:1/16:0) µmol/L	74.9329	84.0215	94.6987	71.1478	82.1665	91.1026	78.6341	90.5253	103.768	74.7207	82.5857	95.3209	75.4083	85.6808	96.6799	72.0568	82.4305	92.3285	74.8856	86.9818	104.046	85.3889	95.7078	104.775	75.3253	84.116	106.387	83.4062	96.5033	114.09	75.0337	86.8704	104.066	84.7431	96.5033	107.938	69.5141	85.948	104.595	63.416	76.7916	91.061	89.6613	95.8204	105.789	67.1525	82.1643	97.709	89.6613
SM(d18:1/18:0) µmol/L	10.6814	12.5713	14.8414	10.339	11.6973	15.4871	10.8644	13.0435	14.0217	11.2944	13.2394	15.7381	10.7801	12.6995	14.6935	10.5411	12.7394	15.6466	11.0815	13.0168	16.5986	13.3936	14.7461	17.0502	10.9909	13.043	16.6424	12.0825	14.269	17.0075	11.0614	13.043	16.603	12.9742	14.4077	17.0075	10.0598	12.251	20.2905	10.4963	11.4264	13.787	10.9172	13.7068	16.7554	10.3612	12.1104	14.5482	10.9172
SM(d18:1/18:1(9Z)) µmol/L	7.16055	8.91662	10.8383	8.08972	9.96611	12.4012	7.54405	8.6109	11.4982	7.94566	9.64343	11.6798	7.37065	8.80306	10.8716	8.05123	9.90512	11.9689	7.95252	9.34931	12.1839	7.03138	11.5042	14.5393	7.53114	9.85692	11.4177	9.55346	10.8656	13.03	7.94932	9.57178	12.1453	9.0103	10.955	13.32	10.0664	11.6212	13.0052	6.41474	9.41275	11.2942	7.81236	10.0093	12.4947	8.83626	10.5355	12.1919	7.81236
SM(d18:1/20:0) µmol/L	170.467	239.139	291.19	172.885	240.195	304.514	178.146	271.373	296.343	183.96	269.221	354.448	175.458	244.22	294.221	173.903	247.368	309.51	225.343	268.426	313.854	134.426	206.131	305.23	154.171	254.53	322.698	218.377	273.085	314.208	199.146	266.452	314.51	197.937	265.435	308.308	216.104	272.709	315.082	151.047	225.289	256.129	266.461	319.977	370.815	207.675	255.993	293.03	266.461
SM(d18:1/20:1) µmol/L	6.22618	8.64884	11.3402	7.13826	9.7217	12.6979	6.36616	10.3661	12.0365	8.03153	9.96733	13.2956	6.22618	8.77084	11.6261	7.37086	9.85209	12.7347	7.70445	9.23859	11.2954	5.20437	7.03971	9.9949	5.73371	9.86217	14.5745	6.52726	9.69637	13.545	7.48049	9.45976	12.1634	5.89018	9.13535	12.5266	7.92427	10.3944	13.413	6.38683	9.065	11.0858	9.41095	10.9119	11.9667	7.4317	9.53294	12.2168	9.41095
SM(d18:1/22:0) µmol/L	68.2589	100.62	136.596	66.7175	98.6229	145.266	70.9518	94.559	125.199	81.5381	118.661	170.538	70.025	99.8338	134.443	69.518	102.141	154.378	75.9097	111.572	149.289	49.4345	77.031	106.517	61.9044	89.2663	152.643	78.4668	106.512	132.198	72.2197	106.746	149.389	69.824	99.5193	124.718	89.5842	116.956	170.675	67.043	121.461	153.828	87.2656	107.196	160.717	92.2815	119.208	163.186	87.2656
SM(d18:0/24:0) µmol/L	14.5826	18.4234	25.815	13.7661	17.7082	24.1017	15.4763	18.0441	21.4457	17.1039	20.8929	27.8395	14.6161	18.4234	25.2762	14.8695	18.4124	26.2135	13.9426	17.8889	26.3154	13.5561	16.0728	20.3559	12.1554	15.914	28.9092	13.0843	18.4489	26.0243	13.4546	17.6661	27.0425	13.107	17.8094	24.7622	15.1481	20.8946	23.0475	14.0877	21.5216	26.0393	12.2864	16.2279	26.1991	15.1638	20.9392	24.7736	12.2864
SM(d18:1/26:0) µmol/L	3.44877	4.87527	7.65868	3.47964	5.30977	9.49553	2.88891	4.52631	6.22763	4.30506	6.33641	8.78822	3.3984	4.80389	7.32406	3.74448	5.7803	9.1484	3.53346	5.29301	8.78001	1.7873	3.33592	5.36291	2.55233	5.09715	8.08466	3.6388	5.07469	6.52491	3.30168	5.18883	8.56295	3.00309	4.75663	5.98417	4.46112	7.17889	8.77798	3.23606	5.43877	13.2622	3.82808	5.26791	8.22654	4.64351	6.43861	10.8592	3.82808
SM(d18:0/14:0) µmol/L	0.274996	0.351376	0.480707	0.262284	0.341195	0.440323	0.291911	0.356056	0.515981	0.263698	0.379372	0.483396	0.279157	0.353492	0.482979	0.262483	0.354821	0.467747	0.318973	0.396526	0.560932	0.337767	0.405134	0.472097	0.270164	0.373379	0.560755	0.32976	0.412938	0.471692	0.307277	0.387415	0.560045	0.32976	0.405614	0.468046	0.29208	0.390801	0.605415	0.232635	0.315005	0.554837	0.392746	0.441195	0.494412	0.278158	0.353033	0.56766	0.392746
SM(d18:0/20:0) µmol/L	57.9486	81.5204	114.671	54.3448	70.5334	99.6662	59.1433	90.0024	109.122	65.9598	91.2707	129.227	58.2507	82.8791	111.993	58.3395	80.6761	106.691	68.0319	91.1938	125.716	52.1818	66.4261	93.4276	51.4111	97.2979	161.763	75.9507	95.9613	116.874	67.584	92.0587	137.654	71.0027	84.1703	109.516	67.0387	69.3665	119.065	52.668	63.1301	81.7843	83.233	98.361	112.298	63.1415	68.7848	109.298	83.233
SM(d18:1/22:1) µmol/L	46.885	64.9235	84.2229	45.6906	71.6975	94.9034	42.9588	63.4991	73.6728	63.6329	75.9835	100.406	46.1428	64.9235	81.4997	55.9419	74.898	99.3834	48.9824	66.4484	84.1561	24.9898	43.9533	68.4588	37.2213	57.9606	82.1032	49.4059	65.0812	86.0568	46.0773	65.7407	82.1943	41.6351	63.8164	78.1525	55.4117	77.0837	94.2085	43.7998	73.6818	101.606	53.9978	63.5542	73.4605	57.962	75.3827	93.8563	53.9978
SM(d18:1/24:0) (µmol/L)	18.8004	22.074	32.0815	17.3534	22.583	28.5378	18.223	22.4092	26.1287	21.2062	25.6468	34.4356	18.8004	22.1567	31.1925	19.2348	23.8884	32.2526	17.708	22.7005	34.0235	15.8073	19.6428	24.2919	16.2109	20.6343	36.5429	16.5224	22.6534	31.1179	17.3553	22.6929	35.5347	16.4488	21.7836	30.5896	18.0045	24.8113	27.8913	17.0569	26.4763	32.6822	15.551	19.7883	33.8844	18.634	25.1607	30.0372	15.551
SM(d18:1/24:1) (µmol/L)	45.8403	61.0148	81.3305	37.2708	49.1256	65.7796	48.5682	61.0969	77.5595	42.2198	54.8393	77.8862	47.301	61.0148	80.953	39.747	51.9587	74.6468	49.006	65.2068	97.6114	49.0482	60.818	77.464	45.4747	67.7675	121.915	49.6265	68.3872	100.714	47.394	65.362	99.313	49.6265	62.4843	93.5993	40.9628	69.7867	90.4754	35.2249	50.5757	90.4172	57.6661	61.012	111.85	38.3282	64.1965	86.9772	57.6661
SM(d18:1/26:1) (µmol/L)	2.40044	4.50813	8.56842	2.43119	4.66568	8.77855	2.58212	3.82064	6.67807	3.01588	5.57988	8.81822	2.47228	4.25465	8.22447	2.91133	4.76952	8.75403	2.93296	4.9689	10.3502	1.43897	3.84416	4.99929	2.1559	5.38995	11.0829	3.0919	4.95524	7.02023	2.9089	5.13823	10.4924	2.93028	4.56507	5.82768	3.09762	4.61126	8.33594	2.72454	4.35056	12.5914	3.05163	4.21248	9.46186	3.27025	4.48091	8.73017	3.05163
PC(14:0/14:0) µmol/L	0.109301	0.191423	0.333686	0.100208	0.171503	0.25706	0.104793	0.200474	0.303047	0.0704294	0.183105	0.295295	0.109301	0.192357	0.324885	0.0913218	0.171503	0.267545	0.102886	0.191863	0.306888	0.167344	0.315525	0.518101	0.113774	0.219212	0.307628	0.109502	0.251208	0.381952	0.106282	0.195451	0.30641	0.136776	0.251208	0.413309	0.0833944	0.120038	0.397386	0.0496534	0.126548	0.322004	0.192813	0.26888	0.4555	0.0855918	0.123293	0.361458	0.192813
PC(14:0/18:1) µmol/L	1.13402	1.42579	1.90202	1.07129	1.42865	1.82188	1.17623	1.51496	2.07684	1.12992	1.66761	2.07587	1.14586	1.4368	1.90202	1.07388	1.44753	1.99912	1.22112	1.48078	1.91862	1.18408	1.49643	1.74022	1.11443	1.3803	2.2119	1.19559	1.42012	1.86105	1.20454	1.47299	1.9548	1.19559	1.45228	1.73798	1.15331	1.45482	2.03798	0.955931	1.55928	1.64304	1.32589	1.51998	1.96994	1.15543	1.50705	1.68625	1.32589
PC(14:0/18:2) µmol/L	2.42431	3.22608	4.31209	2.98112	3.79712	5.05497	2.98049	3.34319	4.4394	3.05612	3.72896	4.7105	2.57329	3.32681	4.36184	2.9865	3.78156	5.03425	2.66965	3.23601	4.4984	2.61257	3.29951	4.76048	2.21829	3.0229	3.71835	2.53982	3.19231	3.99544	2.58818	3.21181	4.24685	2.56208	3.25669	4.04506	2.79226	4.1513	5.06258	2.29084	3.06372	4.22467	3.38772	4.25362	6.08722	2.59042	3.89576	4.38281	3.38772
PC(14:0/18:3) µmol/L	0.0410763	0.0765552	0.129624	0.0439897	0.0833165	0.129032	0.0561941	0.094168	0.145628	0.0629504	0.0942503	0.201088	0.0422243	0.0812449	0.131705	0.0456463	0.0876306	0.150688	0.0460703	0.0916343	0.141808	0.0537564	0.0969111	0.171699	0.0508525	0.0813675	0.130816	0.0640076	0.0802627	0.140708	0.047213	0.0906971	0.140853	0.0640076	0.0850652	0.140708	0.0342983	0.0677128	0.110874	0.0169976	0.0436313	0.0766071	0.0394009	0.120654	0.215914	0.0280005	0.0649501	0.0793242	0.0394009
PC(14:0/20:3) µmol/L	0.148581	0.213874	0.361295	0.170683	0.256059	0.433042	0.174736	0.27536	0.436904	0.146967	0.240622	0.338791	0.155018	0.222814	0.392169	0.166401	0.249143	0.37133	0.158287	0.240496	0.333862	0.158584	0.211665	0.379319	0.140326	0.207423	0.302493	0.14644	0.238905	0.373752	0.150431	0.234873	0.317612	0.157909	0.2204	0.353592	0.0818677	0.153108	0.325759	0.125183	0.210471	0.421407	0.243141	0.286834	0.418451	0.107471	0.165645	0.310017	0.243141
PC(14:0/20:4) µmol/L	0.364171	0.551054	0.832385	0.41033	0.630312	0.936169	0.51168	0.637195	0.802323	0.434785	0.610945	0.919538	0.379444	0.577263	0.820562	0.421852	0.6256	0.912537	0.462984	0.596824	0.820192	0.413288	0.585086	0.897074	0.315046	0.637732	0.98658	0.416956	0.596144	0.905772	0.44783	0.608437	0.836623	0.420574	0.596144	0.905772	0.286557	0.508026	0.660763	0.2528	0.551492	1.11869	0.575396	0.691078	0.971734	0.289541	0.529759	0.801952	0.575396
PC(14:0/20:5) µmol/L	0.0180677	0.0442239	0.0713627	0.0181887	0.0308804	0.0574595	0.0177782	0.0523935	0.111998	0.0151464	0.0374686	0.0643703	0.0180677	0.0453608	0.0764088	0.0176695	0.0333216	0.0578473	0.0255968	0.0530293	0.0954339	0.0419824	0.0653685	0.097002	0.0151184	0.0486453	0.135153	0.03013	0.0550252	0.0805857	0.0242846	0.052741	0.107549	0.0360364	0.0550252	0.0912484	0.0192015	0.0489926	0.0639887	0.0112816	0.028103	0.0427383	0.0099364	0.0341869	0.0483366	0.0178291	0.0424592	0.0548704	0.0099364
PC(14:0/22:5) µmol/L	0.0479147	0.0901435	0.147103	0.0434663	0.0824466	0.119538	0.0326972	0.0774243	0.11641	0.0419131	0.0848392	0.116708	0.0473034	0.0873342	0.143957	0.0425474	0.0824466	0.118793	0.0507913	0.0914605	0.14764	0.0798226	0.0996733	0.113239	0.0237711	0.0676557	0.118232	0.0564316	0.0987922	0.119412	0.0467227	0.0865496	0.140451	0.0675627	0.0988976	0.1138	0.0192504	0.0716734	0.191132	0.0159956	0.0174904	0.0619188	0.0647609	0.10378	0.142807	0.0164674	0.02632	0.100933	0.0647609
PC(14:0/22:6) µmol/L	0.0454893	0.0972166	0.186423	0.0427854	0.069591	0.113696	0.106148	0.154593	0.232592	0.0417395	0.077213	0.123842	0.052755	0.109297	0.191253	0.0431378	0.0723377	0.120249	0.0745911	0.124753	0.191648	0.109584	0.152195	0.204589	0.0469704	0.112302	0.192781	0.0748304	0.102914	0.156619	0.0717031	0.121542	0.191913	0.0823894	0.11907	0.177867	0.0551566	0.0838834	0.234856	0.0312445	0.0653517	0.0940856	0.0476541	0.0815204	0.176824	0.050873	0.0710914	0.116687	0.0476541
PC(16:0/14:0) µmol/L	0.499262	0.821099	1.15908	0.55825	0.74867	1.12571	0.599921	0.934255	1.54066	0.53935	0.962701	1.40541	0.542499	0.833647	1.26662	0.553289	0.823506	1.29884	0.56358	0.895275	1.35607	0.838024	1.47594	2.92965	0.627779	0.993759	1.3749	0.607368	1.08529	1.38028	0.573293	0.928511	1.35783	0.739086	1.08529	1.73576	0.347234	0.400927	1.37667	0.206779	0.352725	1.3421	0.751175	1.0849	1.70761	0.32577	0.379287	1.35695	0.751175
PC(16:0/16:0) µmol/L	19.7838	25.2071	31.5733	19.4688	23.3236	30.5458	18.4005	22.206	27.8033	17.449	22.8676	27.4682	19.5411	24.7748	30.6744	19.369	23.3236	28.3515	20.7837	23.9568	31.9991	24.6993	25.4289	28.4034	20.2473	25.1796	30.6818	18.6025	21.7911	28.9988	20.5138	24.3673	31.3986	19.4184	25.1687	28.705	21.1909	29.5335	33.3881	20.2621	25.4915	31.2883	20.2398	24.8721	31.6944	21.4739	27.2557	33.2245	20.2398
PC(16:0/16:1) µmol/L	2.81734	3.79561	5.44184	2.7049	3.93621	5.77224	3.08253	4.97043	6.23062	2.55159	3.79847	7.00998	2.89955	4.00053	5.80668	2.62944	3.90552	5.84879	3.22673	4.57143	6.44353	3.65187	5.15577	5.97576	2.64157	4.52524	9.00651	3.11825	3.88177	5.94143	3.17921	4.57041	6.56354	3.17026	4.55038	5.95947	2.75218	3.85581	4.16401	2.80584	3.49282	5.07725	2.85407	4.69544	6.67198	2.85344	3.51092	4.15218	2.85407
PC(16:0/18:0) µmol/L	10.249	11.5698	13.2874	10.0048	11.8521	13.7971	10.1662	11.3598	14.5004	10.6095	11.7924	13.422	10.249	11.5533	13.4006	10.1455	11.7976	13.7206	10.7761	12.0359	14.0842	10.1451	10.9594	14.748	10.7674	12.0216	14.1986	11.199	12.2001	13.7814	10.7733	12.0216	14.0873	10.5647	12.0602	14.3842	10.7344	11.8696	15.2702	9.46007	10.8716	12.7635	11.0555	12.5407	13.611	10.6046	11.4609	14.2307	11.0555
PC(16:0/18:1) µmol/L	248.652	303.08	351.778	245.5	288.276	375.783	241.693	323.644	398.789	258.669	278.318	310.479	247.154	307.892	370.974	253.857	282.958	355.941	266.648	311.768	370.937	252.386	306.928	347.021	257.461	318.646	374.272	274.298	320.427	390.539	266.334	311.988	373.474	268.243	320.427	378.526	292.744	317.284	338.734	223.122	257.523	311.167	269.971	312.075	401.122	265.394	309.064	323.419	269.971
PC(16:0/18:2) µmol/L	634.546	807.37	920.641	663.647	866.703	1016.39	607.563	704.027	987.85	719.516	825.614	1025.91	629.767	795.74	925.798	673.205	866.703	1021.26	684.641	799.758	960.896	496.087	759.25	833.83	528.256	671.906	847.276	584.667	753.248	978.564	631.666	782.064	902.036	584.667	753.248	892.636	852.108	913.763	1044.62	593.042	853.913	980.696	762.258	874.531	1036.42	817.565	886.34	1016.48	762.258
PC(16:0/18:3) µmol/L	2.78297	3.64782	4.75779	2.65674	3.18792	4.21968	3.45287	4.04943	5.82066	2.99799	4.37189	5.17043	2.96086	3.75027	5.01186	2.66975	3.5381	4.68299	2.98522	3.93666	5.03288	2.66512	3.85404	6.10934	2.47831	3.82009	5.1045	3.6508	4.22984	5.57396	2.97166	3.9123	5.03742	3.57462	4.11713	5.57396	2.66908	3.16215	5.2522	2.00606	2.29939	2.91805	3.48426	5.04041	6.57021	2.29059	2.70381	4.21038	3.48426
PC(16:0/20:1) µmol/L	2.20415	2.78168	3.62938	1.97461	2.46961	3.11225	2.53758	3.36163	4.31141	1.90957	2.73099	3.31448	2.29115	2.94004	3.72134	1.94702	2.5585	3.13026	2.49363	3.00927	3.95569	2.83479	2.91917	3.82749	2.78483	3.23771	4.42623	2.78824	3.04418	3.92581	2.56474	3.14244	3.97218	2.83239	2.98457	3.86697	2.55736	2.81516	3.22361	1.86861	2.60129	2.77633	2.95917	3.33592	4.03102	2.22562	2.66974	2.90443	2.95917
PC(16:0/20:2) µmol/L	6.10976	7.27502	9.14093	5.70155	7.31103	9.76504	6.16138	7.1499	9.43527	5.77123	6.86878	9.1761	6.11461	7.23897	9.14093	5.72062	7.06374	9.62739	5.4398	6.79126	9.17875	6.38612	7.68364	9.85316	6.05855	7.25127	9.09145	6.07614	6.6152	9.252	5.51023	6.96337	9.13063	6.20605	7.08001	9.39883	4.68184	5.33266	8.47887	5.1931	5.47549	7.12963	6.56616	7.60907	12.4904	5.17391	5.40408	7.89288	6.56616
PC(16:0/20:3) µmol/L	28.2683	39.0107	45.6582	28.4318	38.4408	47.2791	27.8092	38.3695	49.1352	32.4607	35.9883	45.17	28.2683	38.8484	46.3887	31.4895	37.697	46.2941	30.9021	37.258	46.2156	27.1632	33.1201	38.4972	22.6678	38.527	43.8761	31.7118	39.979	44.7287	29.9734	37.6065	45.5615	31.0214	37.8189	43.8849	25.7898	32.509	38.0872	22.2758	41.4203	60.0099	30.797	37.0395	40.3295	25.9759	32.8955	42.6393	30.797
PC(16:0/20:4) µmol/L	33.8407	44.8478	57.6836	34.0382	48.6296	59.5942	35.2857	44.6128	60.4305	37.0519	43.454	56.9346	33.9172	44.8079	57.8992	35.5032	47.7879	59.3101	38.9369	47.7689	58.338	27.5158	43.5927	55.5762	34.8613	47.4465	64.3062	35.1566	45.0416	57.1341	38.5248	47.6655	59.514	31.4964	45.0416	56.7907	33.2865	50.0554	53.9311	38.4655	44.2366	61.4757	37.6251	42.3228	61.1866	37.292	45.4354	53.624	37.6251
PC(16:0/20:5) µmol/L	2.63463	4.58848	10.3956	1.63671	2.48844	4.5	3.23129	7.86516	12.3176	2.31371	3.44729	5.40364	2.68851	5.38227	10.6388	1.91244	2.82439	4.63794	3.21103	7.10586	12.0161	5.35497	8.29353	11.5452	3.49632	10.9801	16.6618	3.44839	6.04287	13.6778	3.25321	7.41873	13.286	3.80951	7.27768	12.2129	1.64875	4.7395	10.9544	1.44706	2.01322	3.5027	3.41678	5.98671	7.56785	1.6203	2.62721	8.30314	3.41678
PC(16:0/22:4) µmol/L	2.65478	4.61441	7.02264	4.00688	5.75384	7.68013	2.18721	3.0637	5.99916	3.44995	5.65885	7.2604	2.49963	4.45971	6.74862	3.82445	5.68277	7.53348	2.42535	4.04497	5.38278	2.27097	3.0121	4.94329	2.22801	3.15767	5.3411	2.28563	2.98007	5.25495	2.32077	3.77578	5.37507	2.2831	2.98007	4.80815	4.06799	4.67493	7.75914	3.94143	5.4429	7.14192	3.04442	3.27004	4.38742	4.14663	4.8865	7.18406	3.04442
PC(16:0/22:5) µmol/L	5.57085	6.80075	8.64003	5.27588	6.69459	7.62755	4.85237	6.34949	7.99685	5.20147	6.46795	7.4853	5.44396	6.69264	8.55828	5.22614	6.67363	7.50137	5.96358	6.87481	8.08161	4.38433	6.00902	8.00944	5.81815	7.36961	8.45136	5.64981	7.03725	8.33937	5.9489	6.93758	8.26368	5.47508	6.99037	8.19674	4.61057	7.64564	9.11242	4.29544	6.19923	6.42206	5.1026	6.4235	7.73374	4.64456	6.42206	8.71116	5.1026
PC(16:0/22:6) µmol/L	4.64629	7.51359	11.4594	3.83687	5.56481	7.62363	6.34697	9.07682	12.4835	3.54833	5.47161	8.79889	4.85077	7.66922	11.5052	3.79065	5.54253	8.23538	6.17745	9.6792	12.465	5.8473	9.45127	12.085	5.66071	8.59775	13.9788	4.86813	9.54776	11.3857	6.16074	9.53841	13.0326	5.34913	9.54776	11.7549	5.01421	10.4772	12.5775	2.80672	3.99025	9.39483	5.74921	7.79366	11.2754	4.16499	7.0641	11.7312	5.74921
PC(16:1/18:1) µmol/L	2.76976	3.41931	4.47261	3.57414	4.27774	5.26041	2.82304	3.42536	4.19536	3.13932	4.07649	4.86334	2.78893	3.41931	4.44532	3.3482	4.24222	5.18358	2.79321	3.63775	4.67697	2.37213	2.95853	3.71724	2.2095	3.71562	5.07889	2.58249	3.25666	4.24649	2.7348	3.64322	4.6802	2.46992	3.0021	3.82896	3.36754	4.10013	5.82571	3.18019	3.81522	4.56221	2.57725	3.2599	3.58618	3.30411	3.95767	4.63393	2.57725
PC(16:1/18:2) µmol/L	1.71482	2.56255	3.50226	2.79706	3.34257	3.939	1.78386	2.26723	3.0397	2.27606	3.05388	4.09159	1.74914	2.49115	3.46398	2.67391	3.23223	4.01357	1.77802	2.48655	3.48174	1.54851	1.74331	3.04745	1.67544	2.05943	2.46276	1.56003	2.33457	3.2285	1.75946	2.29243	3.19047	1.56003	2.25128	3.15757	1.71386	3.54018	5.24064	2.73359	2.95002	3.59474	2.30827	2.64282	3.44087	2.36479	3.10798	4.02192	2.30827
PC(18:0/16:1) µmol/L	0.977293	1.17862	1.73079	1.05988	1.30847	1.67633	1.00979	1.38658	1.88791	0.891582	1.26643	1.72237	0.98832	1.2263	1.78335	1.03743	1.30059	1.68995	0.978438	1.30968	1.83093	1.20787	1.96263	2.84515	1.06817	1.534	2.20027	1.0646	1.35793	2.19706	0.994329	1.35361	1.9063	1.0646	1.44584	2.2891	1.01315	1.16307	1.54878	0.616003	1.11387	1.76806	0.838804	1.50531	2.1811	0.731364	1.1431	1.52862	0.838804
PC(18:0/18:1) µmol/L	89.623	103.129	115.15	82.4024	98.3211	120.155	83.7426	108.227	127.24	93.0547	110.859	123.274	89.0751	103.95	118.925	85.8857	101.715	122.725	93.9944	107.225	122.089	111.127	116.768	123.745	87.4765	102.841	126.35	96.5784	113.66	140.415	92.4201	106.74	122.851	99.8727	114.973	133.383	91.5994	104.807	126.52	75.61	100.54	111.021	89.4994	102.987	125.778	84.4517	101.099	124.514	89.4994
PC(18:0/18:2) µmol/L	189.837	230.296	267.043	200.832	232.008	276.688	173.676	212.432	261.044	204.063	243.49	283.573	185.762	229.987	265.787	201.724	233.991	280.639	185.017	218.881	274.607	172.567	199.103	225.601	156.476	215.251	236.545	171.572	209.572	258.564	180.825	217.671	268.094	171.858	201.731	236.765	232.559	238.191	262.212	179.906	272.479	291.577	221.679	254.29	284.681	229.186	240.038	284.136	221.679
PC(18:0/18:3) µmol/L	1.4489	1.90679	2.5945	1.43554	1.70192	2.60254	1.31602	1.79326	2.87697	1.30965	2.05156	2.79971	1.39607	1.905	2.60558	1.35177	1.87968	2.66651	1.56858	2.00328	2.59692	1.34596	1.76416	2.21388	1.30208	1.68411	2.37161	1.46479	1.71773	2.57392	1.45533	1.95386	2.51201	1.46479	1.7468	2.47516	1.36174	1.90428	2.44867	1.39755	1.90368	2.82055	1.8361	2.39219	3.17562	1.38922	1.90398	2.56452	1.8361
PC(18:0/20:0) µmol/L	0.404147	0.56049	0.745076	0.353951	0.481254	0.635687	0.381192	0.546826	0.796765	0.287049	0.395854	0.541698	0.402144	0.56049	0.747744	0.347137	0.421075	0.607357	0.406675	0.590604	0.830618	0.30735	0.417276	0.804408	0.38089	0.496037	0.751825	0.37784	0.583543	0.682184	0.393515	0.549997	0.822599	0.359782	0.528364	0.682184	0.430102	0.782748	1.1349	0.231463	0.499795	0.590327	0.362767	0.477623	0.702165	0.363352	0.585508	0.961716	0.362767
PC(18:0/20:1) µmol/L	0.69242	0.87275	1.06195	0.596968	0.734882	0.891719	0.734751	0.939163	1.20243	0.662214	0.799995	1.0802	0.696322	0.88466	1.13396	0.612972	0.774277	0.997405	0.684321	0.909979	1.11124	0.766874	1.10807	1.59918	0.638694	0.917461	1.42261	0.680366	0.874589	1.22521	0.668317	0.912588	1.16706	0.704055	1.01055	1.22521	0.551546	0.683689	0.990322	0.552756	0.677254	0.972931	0.648317	0.901625	1.19567	0.572658	0.680471	0.97432	0.648317
PC(18:0/20:2) µmol/L	4.83613	5.60071	6.70649	5.01387	5.94387	6.94081	5.74735	6.33065	7.0097	5.3498	5.91119	6.7166	4.87452	5.99926	6.87113	5.09077	5.94387	6.86303	4.61492	5.52319	6.78037	5.54298	6.24922	7.18307	5.07454	5.79418	7.25881	5.22962	6.32254	7.33334	4.65105	5.56545	6.8306	5.5209	6.32254	7.15941	3.85256	4.91757	6.30323	4.28408	5.53719	6.64791	5.07339	6.16464	7.80078	4.10506	4.99481	6.17864	5.07339
PC(18:0/20:3) µmol/L	27.4712	33.2448	43.5489	24.0927	35.6512	46.9728	23.7876	29.8477	45.5051	29.4458	38.3262	44.6586	25.9144	32.7557	44.3479	25.2844	36.4848	44.6586	27.3961	33.5722	46.4359	20.7245	28.049	36.8962	24.7148	33.6727	41.9105	25.7508	33.2194	39.5115	27.2354	33.5931	44.4725	24.6585	32.6801	38.9071	26.7348	29.1343	32.9402	20.5778	58.2685	65.2249	23.49	31.0216	38.759	25.9477	30.6592	52.7532	23.49
PC(18:0/20:4) µmol/L	41.4466	51.7695	65.0284	42.2706	55.3904	69.0105	39.6768	47.4098	66.7818	39.1581	48.7442	66.0075	41.2921	51.4513	65.3884	41.865	54.3319	66.9688	41.3089	50.1901	68.7179	41.3823	49.5086	54.157	43.6312	49.8904	62.8015	38.6778	51.3715	59.7299	41.4466	50.0352	65.2947	39.5982	50.9022	58.1081	30.42	57.7787	68.9483	49.0584	57.5005	80.3445	41.2259	49.24	62.3403	36.6266	57.6396	68.6077	41.2259
PC(18:0/20:5) µmol/L	1.42604	2.34703	4.82441	0.77441	1.36051	2.21128	1.95347	3.50311	6.08568	1.0788	1.50449	2.49385	1.4586	2.54666	4.93287	0.946879	1.39504	2.23514	1.46917	3.08671	7.05223	2.05798	5.22864	5.98443	1.78182	4.53601	7.83145	1.61959	2.68923	5.27576	1.51096	3.19331	7.26283	1.8952	2.95525	5.82517	0.603909	2.89746	7.00335	0.818019	1.49891	2.50434	1.63723	2.97857	3.66472	0.716115	1.54761	5.92736	1.63723
PC(18:0/22:4) µmol/L	2.46547	3.50953	5.08242	3.1171	4.42502	6.04495	2.20234	3.04156	3.87861	3.23698	4.11268	5.76878	2.42169	3.34365	4.87542	3.16684	4.16403	5.76878	2.27556	3.12736	4.63799	2.03872	2.32806	4.3335	1.97113	2.82572	4.81567	1.99499	2.72952	4.81243	2.2485	3.12417	4.66799	2.03124	2.46546	4.7228	2.74622	3.11375	4.44731	4.20799	4.80314	5.60666	2.28864	2.8757	3.83583	2.96375	4.19663	5.0262	2.28864
PC(18:0/22:5) µmol/L	3.70711	4.37994	5.55837	3.32134	4.34168	5.26309	3.61866	4.18444	4.83466	3.62085	4.39232	5.66092	3.70711	4.32126	5.4171	3.41313	4.36297	5.44556	3.53535	4.29479	5.14886	3.24258	4.33615	4.86842	3.56978	5.15435	5.73361	3.94216	4.54732	5.5835	3.55286	4.42171	5.28265	3.94216	4.49907	5.38576	3.10469	5.24428	6.0726	3.18476	4.01654	5.85046	3.0435	4.14759	5.3953	3.16684	4.89158	6.03423	3.0435
PC(18:0/22:6) µmol/L	3.92729	6.67024	10.5538	4.14546	5.62685	7.21124	6.33874	8.17536	12.3449	3.47084	5.31631	7.14999	4.49491	6.9838	10.6653	3.63403	5.46086	7.10155	5.81209	7.9925	10.2255	6.42012	8.6998	13.0673	5.42321	7.4542	12.1988	4.12141	7.57842	11.3067	5.70154	7.85728	10.3858	5.19902	8.05521	11.9578	4.20324	4.97004	19.8608	3.26777	3.96331	8.57952	5.90615	8.12555	10.0618	4.01983	4.74034	10.1891	5.90615
PC(18:1/18:1) µmol/L	40.5326	55.7038	69.5491	45.5841	55.6654	68.5839	36.2589	52.8637	66.7782	37.9352	52.2487	76.7772	39.7616	55.7038	68.5529	43.3876	55.2529	72.3668	39.4093	46.7477	59.9423	34.1386	40.6291	57	31.7053	43.6316	60.8754	40.6818	52.8135	77.6438	38.8658	46.6257	59.956	36.584	49.4225	67.8243	49.9493	62.9319	73.9274	37.5051	59.7586	65.4046	29.3838	55.6136	76.5693	44.3157	61.3453	69.2309	29.3838
PC(18:1/18:2) µmol/L	37.6107	58.229	85.307	48.1406	78.3762	95.2629	29.8552	40.6862	73.2863	55.3156	77.5021	100.826	35.2382	54.5521	84.9867	48.8568	78.1656	96.7709	35.6945	48.9477	73.9966	29.7617	39.924	47.9622	25.2011	41.3532	60.4076	32.6092	41.4327	57.9907	34.5449	47.1664	70.3394	30.6595	40.2901	54.7828	61.8716	75.6915	117.553	58.696	95.7491	99.7141	45.7306	49.7905	61.6986	63.6139	95.4432	109.541	45.7306
PC(18:1/18:3) µmol/L	0.438693	0.632362	0.848271	0.484942	0.594249	0.837673	0.360954	0.555729	0.758426	0.469645	0.674532	1.08643	0.428056	0.611733	0.836385	0.477512	0.614163	0.882539	0.402448	0.577906	0.766294	0.33744	0.502095	0.624514	0.383841	0.497485	0.763776	0.405007	0.567904	0.893158	0.402251	0.551696	0.763908	0.392437	0.56669	0.782741	0.668957	0.908966	0.991716	0.513677	0.638126	0.792514	0.516635	0.727108	1.10707	0.607966	0.736594	0.913316	0.516635
PC(18:1/20:1) µmol/L	0.71251	0.903005	1.17689	0.60661	0.805196	1.085	0.767171	0.927419	1.16466	0.616705	0.961123	1.29407	0.716957	0.912464	1.17221	0.618823	0.885741	1.14402	0.695108	0.937304	1.2057	0.759759	0.864918	1.11592	0.591094	1.01273	1.31669	0.801342	0.973187	1.30116	0.665394	0.947179	1.22903	0.785671	0.927508	1.18621	0.767627	1.06257	1.52739	0.594347	0.937596	1.16496	0.920081	1.04289	1.17292	0.769551	0.96202	1.38852	0.920081
PC(18:1/20:2) µmol/L	0.867219	1.35111	1.83054	1.14395	1.67655	2.20472	0.891471	1.1678	1.65604	1.15985	1.4122	2.03014	0.879244	1.28435	1.77386	1.14564	1.6118	2.12036	0.774131	1.03016	1.64093	0.627703	0.787694	1.36939	0.839174	1.12246	1.35973	0.970906	1.19888	1.65997	0.786208	1.06122	1.58098	0.811228	1.12816	1.53232	1.46285	1.63292	2.30454	0.906678	1.41497	1.80785	1.138	1.3019	1.45049	1.25494	1.60261	1.95802	1.138
PC(18:1/20:3) µmol/L	4.66844	7.28602	13.1728	7.19388	9.24256	15.0478	4.31924	5.71442	9.08178	5.60705	10.3096	13.7683	4.66844	7.00616	11.8349	6.92377	9.89507	14.123	4.0739	6.12788	10.3977	3.29408	3.77226	5.24878	4.63945	5.89496	7.13978	3.83139	5.6515	7.53541	4.13812	5.9581	9.84739	3.46851	4.87777	7.07805	6.75642	9.17394	10.4545	7.13637	14.9939	23.6432	4.12784	4.75584	7.06213	6.8363	10.0741	14.507	4.12784
PC(18:1/20:4) µmol/L	5.37378	7.48701	13.4252	8.26255	10.3811	14.1491	4.79124	6.92685	9.66783	6.50064	10.851	14.1954	5.17281	7.3312	12.84	7.59387	10.7673	14.1941	5.43978	7.63252	11.3858	4.00461	5.38256	6.38915	5.17983	6.69319	8.72939	4.78668	6.29741	8.22103	5.3684	7.38791	10.5894	4.6099	6.03359	7.7455	6.90527	10.7684	15.2263	8.35999	11.2367	21.3903	5.14483	5.64315	7.34599	7.49543	10.8363	17.9626	5.14483
PC(18:1/20:5) µmol/L	0.324962	0.54856	0.834499	0.241617	0.362624	0.5465	0.397403	0.587282	1.06214	0.31177	0.488957	0.654381	0.341024	0.551608	0.878534	0.251898	0.410389	0.60143	0.361617	0.634965	0.92527	0.497441	0.574493	0.980617	0.371073	0.754572	1.16875	0.340471	0.529536	0.900139	0.366871	0.646453	1.06833	0.398288	0.533908	0.938524	0.33485	0.727563	1.14478	0.213201	0.280003	0.365559	0.385978	0.575115	0.730779	0.240128	0.365559	0.983164	0.385978
PC(18:1/22:4) µmol/L	0.261211	0.579663	1.10981	0.655919	0.862807	1.14506	0.266109	0.366558	0.625535	0.381503	0.785543	1.2951	0.264481	0.438148	1.02951	0.552162	0.862807	1.16183	0.225674	0.368742	0.883677	0.175333	0.298821	0.357506	0.179414	0.291598	0.498377	0.242981	0.42447	0.578098	0.207677	0.356696	0.7563	0.227965	0.362352	0.551401	0.522214	0.627886	0.839032	0.598591	0.927607	1.22666	0.209143	0.35626	0.547152	0.553345	0.676451	0.929421	0.209143
PC(18:1/22:5) µmol/L	0.458313	0.74977	1.46988	0.824491	1.20114	1.66335	0.405287	0.622698	0.901304	0.725984	1.08689	1.51442	0.435935	0.721849	1.39773	0.773805	1.10982	1.57918	0.415322	0.589971	1.10581	0.347467	0.391436	0.522652	0.413981	0.609735	0.875708	0.365083	0.521508	0.718494	0.415674	0.592041	0.952186	0.363081	0.513321	0.668738	0.72764	1.3406	1.56136	0.524867	1.6369	2.03327	0.350226	0.513592	0.820831	0.715973	1.41408	1.85867	0.350226
PC(18:1/22:6) µmol/L	0.489806	0.684783	0.892734	0.407079	0.67652	0.925347	0.489493	0.659103	0.802952	0.403682	0.72333	0.881004	0.489806	0.681865	0.888227	0.403682	0.701444	0.904387	0.487771	0.66307	0.915844	0.585099	0.670106	0.742886	0.385072	0.658464	0.864683	0.458067	0.573027	0.886769	0.469109	0.661979	0.889444	0.488806	0.648253	0.857964	0.654372	0.824097	1.44317	0.308512	0.592962	1.25625	0.470869	0.649633	1.21841	0.561483	0.803137	1.34718	0.470869
PC(18:2/16:1) µmol/L	4.30317	7.09336	10.5031	7.82009	9.25948	11.1939	4.71398	5.97338	8.03657	5.8484	8.91144	10.9811	4.43274	6.5531	9.60876	7.09777	9.16937	11.1177	4.7945	6.08449	9.29458	3.6304	4.47611	9.01684	4.0904	5.55492	6.63026	4.40374	5.62291	8.17257	4.60668	5.92771	8.46274	3.93452	5.45164	8.17257	4.99739	11.1687	13.3482	7.18968	9.05927	10.9279	4.95067	6.96471	9.2022	6.84907	9.73614	11.5471	4.95067
PC(18:2/18:2) µmol/L	11.8373	15.8447	22.3532	13.0548	17.6961	23.3814	9.12696	11.1249	20.9476	11.6086	21.6055	27.9281	11.1279	14.8024	22.2764	12.9529	19.2573	24.4082	10.0461	14.1548	20.775	8.9459	10.4992	13.4705	7.27176	10.6551	14.4974	8.60437	14.089	22.8168	9.35925	13.1741	18.9757	8.82815	11.9719	18.8009	13.6419	19.2763	29.1518	8.8513	16.8443	23.8079	11.5102	17.07	31.9743	12.9557	17.8084	26.8693	11.5102
PC(18:2/18:3) µmol/L	0.343352	0.537965	0.829992	0.376753	0.620076	0.821452	0.410643	0.504272	0.772857	0.421484	0.708641	0.970749	0.376195	0.534767	0.829312	0.386287	0.629859	0.910299	0.32537	0.570239	0.789599	0.317747	0.369457	0.641887	0.238125	0.399848	0.74332	0.434453	0.59423	0.835763	0.30518	0.527064	0.781661	0.361877	0.506471	0.771982	0.353914	0.778511	0.996256	0.313921	0.766644	0.946207	0.541411	0.854393	1.21514	0.37341	0.771917	0.968629	0.541411
PC(18:2/20:1) µmol/L	0.459108	0.669048	0.939382	0.450867	0.567307	0.85041	0.481735	0.677862	0.973332	0.503199	0.713353	0.926484	0.46748	0.669048	0.948665	0.462868	0.629587	0.887502	0.533822	0.754127	0.965815	0.343037	0.559523	0.67415	0.363071	0.610543	1.06584	0.420865	0.725639	0.987803	0.518144	0.72792	1.00058	0.420865	0.655917	0.859658	0.57391	0.724597	0.83269	0.470435	0.797677	1.31971	0.594657	0.861697	1.13056	0.597337	0.742928	1.03235	0.594657
PC(18:2/20:2) µmol/L	0.275593	0.424038	0.601603	0.33467	0.435441	0.673343	0.275867	0.371177	0.609187	0.280766	0.412435	0.573576	0.275593	0.406125	0.601603	0.333957	0.426138	0.63008	0.254738	0.383456	0.648454	0.202234	0.242785	0.38601	0.219851	0.355016	0.492526	0.177057	0.368471	0.598939	0.253656	0.381494	0.575052	0.189121	0.293931	0.525775	0.311033	0.464259	0.518765	0.257925	0.744358	0.968286	0.289889	0.489958	0.589473	0.341123	0.467178	0.755758	0.289889
PC(18:2/20:3) µmol/L	0.456733	0.713621	1.01309	0.591103	0.828006	1.16909	0.429072	0.580061	0.861303	0.594105	0.806034	1.08765	0.449268	0.658756	0.963182	0.593976	0.825058	1.12657	0.444094	0.670848	0.920186	0.272674	0.471771	0.656417	0.386144	0.538178	0.673405	0.385821	0.601209	0.954141	0.43342	0.634196	0.870274	0.361201	0.571743	0.703112	0.519034	0.627575	0.758737	0.548084	1.18707	1.26515	0.489782	0.61203	0.784861	0.532849	0.704528	1.08925	0.489782
PC(18:2/20:4) µmol/L	1.64723	2.24147	2.9325	1.79881	2.58482	3.12814	1.5409	1.93717	2.49606	1.84412	2.58304	3.25714	1.55965	2.18784	2.8757	1.83007	2.58304	3.16483	1.49629	2.07245	2.71393	1.32372	1.78755	2.13099	1.1923	1.73006	2.21978	1.30683	1.58024	2.75681	1.40216	1.96526	2.57173	1.31553	1.64593	2.56426	2.13145	2.30944	2.7754	1.91116	2.8832	3.36603	1.52104	2.01401	2.63742	2.14226	2.48235	2.97332	1.52104
PC(18:2/20:5) µmol/L	0.126648	0.19793	0.477325	0.108063	0.170764	0.249939	0.195675	0.295918	0.48257	0.123448	0.217083	0.392078	0.128892	0.217681	0.481752	0.10981	0.18974	0.275819	0.161683	0.319565	0.579108	0.16608	0.341111	0.64149	0.179172	0.380079	0.656726	0.109326	0.276687	0.530219	0.16708	0.337474	0.590557	0.123941	0.276687	0.558941	0.060372	0.253572	0.782743	0.0582448	0.113818	0.181809	0.147167	0.231496	0.388713	0.0689657	0.146483	0.616905	0.147167
PC(18:2/22:6) µmol/L	0.0656032	0.112934	0.161551	0.0627309	0.0957326	0.164968	0.0678991	0.116906	0.165291	0.0600148	0.114772	0.169998	0.0673225	0.113291	0.164467	0.0622271	0.103931	0.166776	0.0938549	0.134003	0.18819	0.0800229	0.174595	0.200801	0.0814842	0.135435	0.204558	0.0748651	0.109927	0.186929	0.0894886	0.13404	0.192709	0.0823922	0.136553	0.195741	0.0983637	0.196446	0.307022	0.0681677	0.0778187	0.112893	0.0792207	0.122909	0.191058	0.0783759	0.122051	0.266791	0.0792207
TAG40:0 µmol/L	0.108733	0.198776	0.391977	0.130541	0.163521	0.221572	0.175065	0.282125	0.609464	0.113656	0.205091	0.342137	0.1275	0.212435	0.424936	0.119332	0.16915	0.240097	0.124923	0.23922	0.474114	0.20526	0.446803	0.70585	0.198004	0.273073	0.419113	0.179089	0.346584	0.849309	0.15126	0.251378	0.467999	0.190125	0.36404	0.782194	0.121938	0.217897	0.256375	0.0565401	0.15012	0.213309	0.133453	0.259762	0.431165	0.107475	0.190891	0.236378	0.133453
TAG42:0 µmol/L	0.206145	0.359157	0.890477	0.192706	0.264684	0.426539	0.298117	0.614564	1.20234	0.249632	0.370848	1.00845	0.214524	0.430599	1.00381	0.193963	0.299264	0.507107	0.248894	0.492944	1.02395	0.448792	0.861482	1.55692	0.282413	0.683907	0.950375	0.344649	0.689138	1.60165	0.26221	0.566631	1.0055	0.374998	0.809487	1.5705	0.256865	0.318396	0.3912	0.0599841	0.185288	0.480437	0.289598	0.59199	1.24343	0.117883	0.298025	0.451323	0.289598
TAG42:1 µmol/L	0.168117	0.364387	0.730855	0.171042	0.237646	0.373711	0.246829	0.573285	1.04973	0.16478	0.282008	0.972489	0.183081	0.388321	0.755513	0.17095	0.255159	0.478727	0.217338	0.443451	0.798393	0.313178	0.668077	1.15974	0.267921	0.655898	1.10247	0.269133	0.584697	1.1898	0.225873	0.478601	0.849924	0.271564	0.584697	1.1898	0.218674	0.296894	0.364074	0.063421	0.176304	0.463704	0.274315	0.478268	0.783524	0.12342	0.26225	0.360653	0.274315
TAG42:2 µmol/L	0.0158935	0.0301042	0.0933587	0.0126772	0.0189697	0.043874	0.0263565	0.055103	0.122547	0.0134216	0.0294503	0.0914247	0.0167557	0.0342002	0.0974951	0.0134216	0.0243739	0.0563387	0.0187458	0.043074	0.0901398	0.0256494	0.0428688	0.131096	0.0164602	0.0551289	0.0946283	0.0339756	0.0613201	0.0891286	0.0184971	0.0487957	0.0928051	0.0300928	0.0573822	0.0897683	0.00566498	0.0171283	0.0618578	0.00994535	0.0350617	0.144707	0.023165	0.0507322	0.107547	0.00721511	0.0241178	0.0589993	0.023165
TAG44:0 µmol/L	0.68798	1.28606	2.62608	0.733757	0.972418	1.54526	0.906604	1.93039	3.52501	0.707575	1.25262	2.32392	0.693003	1.3555	2.98272	0.734238	1.0626	1.83279	0.923798	1.50674	3.17167	1.37467	2.56908	3.73676	0.999101	2.15538	3.94176	1.13679	2.31056	4.77517	0.970029	1.76012	3.22344	1.14331	2.48045	4.42773	0.844455	0.981295	1.28598	0.237145	0.622918	1.67904	1.18208	1.56945	4.33433	0.450226	0.967037	1.33477	1.18208
TAG44:1 µmol/L	0.596074	1.15103	2.55907	0.589414	0.826404	1.29852	0.96425	1.85737	3.79103	0.610517	1.19369	2.89351	0.65273	1.25276	2.81738	0.598588	0.898694	1.83354	0.77506	1.49137	2.81379	1.44662	2.48231	2.92201	0.823156	2.24647	3.57961	1.19377	2.67417	4.2397	0.803711	1.60074	2.97263	1.28592	2.67417	4.14833	0.771557	0.87151	1.29517	0.226666	0.500153	1.75621	1.02863	1.82729	3.23923	0.359498	0.862282	1.24074	1.02863
TAG44:2 µmol/L	0.279342	0.466485	1.08655	0.25767	0.331158	0.554176	0.486923	0.842551	1.45028	0.301625	0.530999	1.37607	0.291364	0.595903	1.20405	0.259035	0.382333	0.870788	0.35095	0.618023	1.07431	0.494783	0.657984	1.4398	0.331699	0.922172	1.37524	0.455424	0.78631	1.49886	0.34998	0.632382	1.13864	0.460968	0.730326	1.4361	0.28275	0.375512	0.607553	0.118517	0.188047	0.822077	0.508416	0.917281	1.23132	0.154451	0.352116	0.742481	0.508416
TAG44:3 µmol/L	0.00804164	0.019122	0.0356599	0.00723421	0.0131642	0.0174889	0.0176475	0.024178	0.0373027	0.0047534	0.0168618	0.049291	0.0108757	0.0200887	0.0356599	0.00705494	0.0141993	0.0209329	0.0077224	0.0161942	0.0384535	0.0122936	0.0251143	0.0690372	0.0104406	0.0314333	0.0506612	0.0155564	0.0197708	0.039077	0.00852134	0.0183682	0.0423308	0.0155564	0.0227504	0.0426627	0.00247749	0.00677379	0.0147648	0.00544944	0.00889038	0.0310585	0.0111416	0.0242886	0.0430474	0.00264885	0.00859606	0.0172886	0.0111416
TAG46:0 µmol/L	1.96899	3.3088	7.96026	1.81463	2.58092	4.87578	2.4306	4.90662	10.8068	2.10354	3.85522	6.63048	2.00435	3.72802	8.4093	1.87423	2.92266	5.84564	2.38229	4.22641	8.93004	3.5434	7.58706	10.0387	2.6446	5.50588	13.3484	2.5608	7.00954	15.9624	2.43965	4.4798	9.11421	2.82877	7.00954	13.0011	2.01082	2.49651	4.0211	0.67601	1.27179	3.88926	4.27428	6.54245	12.5833	1.12199	2.31031	3.90708	4.27428
TAG46:1 µmol/L	2.38212	4.91706	9.52334	2.45616	3.48143	5.78294	3.20631	8.93759	13.2902	2.34709	5.25033	11.7284	2.62338	5.1979	10.8688	2.39297	3.91107	7.98711	3.43669	5.73131	10.1763	5.83617	7.36141	9.01655	4.09517	7.31953	16.4039	3.89075	8.8467	16.0574	3.61234	5.97831	11.5564	4.36351	8.20794	15.7791	2.6408	3.50127	4.90575	1.14168	1.6505	8.87252	4.28213	6.79211	15.9415	1.33891	3.22001	5.46997	4.28213
TAG46:2 µmol/L	1.48307	2.49007	4.77415	1.30928	1.71505	2.99519	1.79736	3.5294	7.1577	1.62649	2.76724	7.16102	1.54669	2.68433	5.03262	1.37296	2.06286	4.7027	1.77541	2.85644	4.82396	2.18814	3.05553	4.2649	1.91201	3.27594	5.97741	2.10499	3.75671	6.62474	1.81027	2.96581	5.01652	2.22085	3.54246	6.49432	1.34386	2.02929	2.78802	0.64526	0.860098	5.71377	2.14978	4.16825	6.21402	0.791153	1.79808	4.13115	2.14978
TAG46:3 µmol/L	0.410293	0.611073	1.34164	0.317259	0.461338	0.866956	0.515989	0.863595	1.64644	0.4706	0.729715	1.67737	0.426818	0.649635	1.35478	0.368106	0.503319	1.01311	0.451663	0.688437	1.1076	0.491449	0.657549	1.23572	0.418923	0.839105	1.22013	0.535504	0.909013	1.646	0.451159	0.708699	1.13989	0.535504	0.742278	1.52093	0.342267	0.543275	0.874984	0.203246	0.325294	1.21305	0.506623	1.06745	1.48821	0.252224	0.494442	0.889694	0.506623
TAG46:4 µmol/L	0.0268867	0.0428111	0.0813364	0.024649	0.0329616	0.0527302	0.0375938	0.067559	0.10965	0.0301349	0.0508559	0.0917514	0.0279474	0.0450453	0.0853641	0.025901	0.0413542	0.0607453	0.0252096	0.0474478	0.0740954	0.017125	0.0396827	0.109052	0.0242273	0.043182	0.0803582	0.0246116	0.0522295	0.0958889	0.025096	0.0471401	0.0777747	0.0246116	0.0409401	0.0958889	0.0138162	0.0258523	0.0654774	0.0139025	0.025397	0.0826228	0.0259527	0.0798905	0.11974	0.0144395	0.0256247	0.0623354	0.0259527
TAG48:0 µmol/L	5.279	8.63846	15.8393	4.20512	5.99998	13.8494	6.11041	14.4215	21.7469	5.89505	8.9988	22.8988	5.4389	8.88318	17.8654	4.65583	6.90595	15.6276	6.00548	10.6399	19.11	8.00573	12.8728	21.8609	7.80011	14.0392	32.3103	7.33199	18.2099	31.8248	6.43559	10.8843	20.6027	7.53836	13.2612	27.838	4.41874	5.59371	13.7821	2.08463	2.87002	8.37352	10.5544	16.2912	25.8529	2.77869	5.07304	8.54565	10.5544
TAG48:1 µmol/L	12.3702	22.5966	41.8489	10.5878	17.0176	31.7954	13.3204	36.4626	56.3698	12.0253	24.14	48.6321	12.4164	24.0731	44.1207	11.5607	18.3517	39.275	15.8214	26.4134	41.2526	23.842	29.0485	39.7369	17.618	30.5502	74.7991	17.7794	36.0407	57.531	16.2917	26.674	45.4001	19.1039	32.6304	54.5651	10.7367	14.7303	23.2676	4.75967	6.61307	33.4605	25.6493	33.6999	71.9731	5.72551	13.7275	22.8652	25.6493
TAG48:2 µmol/L	9.61671	16.3604	27.9931	7.73452	11.6866	24.1405	11.9202	19.1907	37.8143	10.6461	16.7104	37.0245	9.74199	16.9929	31.2648	8.54566	14.4127	28.9735	10.9237	17.7303	29.2706	11.3133	14.4704	24.153	14.2347	19.8826	37.7657	13.1568	20.865	37.0435	11.1635	17.8702	30.6414	11.4648	19.1422	33.6343	7.34627	10.2603	19.8416	3.60507	7.70386	32.3036	13.829	25.8606	35.4268	4.76553	9.58959	27.7806	13.829
TAG48:3 µmol/L	2.99224	4.77628	7.90769	2.77071	3.71346	5.94302	3.80449	5.73944	9.41666	3.44076	5.10467	11.9414	3.09292	4.84324	8.44917	2.84265	4.05257	8.36772	3.20774	4.94292	8.14981	3.24914	3.69199	5.07488	3.33853	5.39805	7.90557	3.90978	5.96199	8.60316	3.23445	5.00846	8.06073	3.30126	5.23033	8.10801	2.79881	3.73788	5.90018	1.31406	3.92538	11.1391	3.67137	6.64639	9.78014	1.75377	3.83163	6.07282	3.67137
TAG48:4 µmol/L	0.577878	0.887364	1.57423	0.461001	0.688973	1.22354	0.654745	1.1674	1.80285	0.565965	0.902423	2.16025	0.584849	0.907442	1.5961	0.473284	0.728664	1.49428	0.562468	0.857252	1.56035	0.44641	0.663331	1.00115	0.588222	1.06638	1.50771	0.694221	1.21184	1.57941	0.576969	0.885149	1.55421	0.537416	0.994267	1.50426	0.398293	0.810018	1.16989	0.233626	1.17318	2.99226	0.702636	1.30378	1.87588	0.296012	0.850222	1.2516	0.702636
TAG48:5 µmol/L	0.0431509	0.0769434	0.146	0.041912	0.0629278	0.0920852	0.0580106	0.107762	0.179453	0.0461	0.0771507	0.203063	0.0504529	0.081371	0.148838	0.0422163	0.0698496	0.122433	0.045718	0.075339	0.128742	0.0293986	0.0469843	0.124953	0.0364802	0.0725004	0.10489	0.0544747	0.101701	0.164902	0.045374	0.0749813	0.125717	0.0447402	0.0921813	0.14821	0.0307329	0.038878	0.0814842	0.0311465	0.0760711	0.393663	0.0609491	0.118091	0.180257	0.0320296	0.0606435	0.129568	0.0609491
TAG50:0 µmol/L	8.00799	11.6429	20.1435	6.71315	8.52892	16.2418	9.00183	18.0828	24.0594	8.90984	13.0755	26.5424	8.22468	11.8409	21.2296	7.35183	10.4901	19.7514	8.51762	13.4003	22.0607	12.7162	16.8939	23.3555	10.699	17.0561	36.2444	10.0311	21.2933	34.8881	9.08979	14.5039	26.6244	10.7433	17.2631	27.454	5.96855	7.12653	17.3125	3.23585	5.45248	12.1085	14.2902	21.449	33.9942	4.44437	7.04403	12.7197	14.2902
TAG50:1 µmol/L	52.9891	81.2123	138.408	37.972	59.7048	124.05	57.8479	98.0324	150.722	72.5668	97.7247	154.607	53.8946	85.0595	142.244	43.7292	78.4406	130.175	57.3928	91.8882	145.15	55.7055	80.6001	146.355	67.7842	107.702	169.699	61.2941	100.061	233.582	58.7768	95.3304	153.705	61.2941	98.0936	206.403	27.4651	35.535	162.241	18.6591	25.9188	97.817	80.3007	136.576	217.811	22.0818	33.6338	102.049	80.3007
TAG50:2 µmol/L	60.2188	90.8054	128.486	46.6569	71.3125	123.682	68.2469	117.452	155.929	75.2539	111.526	172.068	62.1591	95.4312	134.382	52.7076	90.1024	144.916	67.8526	96.5573	139.066	58.4324	77.2252	111.264	76.3383	108.397	192.55	73.6858	116.667	192.577	69.1736	100.853	146.151	69.8563	109.832	163.295	37.4515	52.0735	136.491	29.2023	50.5273	149.167	79.5857	134.37	167.142	37.293	51.3004	145.245	79.5857
TAG50:3 µmol/L	26.2752	42.2446	56.2194	27.9079	41.9827	55.3417	30.2394	47.4918	66.6373	29.2635	45.8704	74.5194	27.3641	42.9409	58.3007	27.922	42.8252	62.8045	27.4921	36.8044	62.7254	17.2425	29.3089	38.8017	30.4618	44.0121	59.6473	30.7433	39.1487	68.2017	27.6128	38.277	62.4472	28.298	36.1433	64.1524	23.1533	28.8726	45.5959	15.8703	31.8633	77.641	35.1324	55.7902	73.971	19.8296	30.368	45.9167	35.1324
TAG50:4 µmol/L	4.28581	7.19423	11.1831	4.6151	6.49027	10.8664	5.65146	8.7989	12.5842	5.25629	8.10567	15.9188	4.36004	7.34773	11.2472	4.66536	6.94786	12.8775	4.52564	6.88861	11.5656	2.4337	4.33188	5.81895	5.22796	7.01344	10.6961	4.43578	8.92009	11.936	4.55137	6.94457	11.1047	3.92764	5.66749	11.1609	3.88414	5.62869	7.24178	2.51565	9.51444	20.4465	7.96411	9.73963	14.8691	3.1127	6.34881	9.44532	7.96411
TAG50:5 µmol/L	0.685666	1.0987	1.76767	0.639865	0.847755	1.57289	0.787631	1.44328	2.06417	0.721173	1.31756	2.38008	0.731894	1.18336	1.84957	0.653122	0.940527	1.65084	0.738565	1.06088	1.67429	0.486193	0.613075	1.1825	0.794578	1.32797	1.93789	0.929424	1.25509	2.23483	0.766011	1.10259	1.71726	0.632659	1.13107	2.10274	0.534645	1.01982	1.12187	0.392371	1.06285	2.69166	1.0791	1.54645	2.05136	0.480696	1.04133	1.22998	1.0791
TAG50:6 µmol/L	0.0143227	0.0245764	0.0439549	0.011378	0.0210385	0.0386542	0.0161134	0.0253428	0.0489009	0.0128853	0.0261637	0.0562534	0.0148595	0.0250224	0.0445312	0.0126709	0.0228774	0.0391651	0.017964	0.0293961	0.0390546	0.0108176	0.0212906	0.0302068	0.0138035	0.0273015	0.042626	0.0175681	0.0293408	0.057241	0.0162538	0.0289316	0.0397048	0.016293	0.0260036	0.0458097	0.00832026	0.0271617	0.030575	0.0119328	0.0208779	0.0485915	0.0230787	0.0397563	0.0599687	0.0110286	0.0240198	0.0321212	0.0230787
TAG52:0 µmol/L	3.3737	4.8962	8.04021	2.79531	3.90028	6.45088	4.02947	6.37852	8.94131	4.31403	5.70308	9.75204	3.43236	5.09744	8.52111	2.89759	4.68259	7.82909	3.69763	5.61861	8.80708	4.26778	6.05656	8.84961	4.47111	6.78947	10.6584	3.83699	6.88164	12.9142	3.82769	5.79358	9.39752	3.97826	6.57295	9.84207	2.48693	3.51723	6.83964	1.68293	2.27622	5.09351	5.48721	7.5158	13.1937	2.12896	3.05907	5.14534	5.48721
TAG52:1 µmol/L	38.7531	56.6745	80.2564	32.0351	43.1236	67.5219	41.6633	66.6953	100.463	46.568	72.1764	113.322	39.1799	58.8553	84.6751	33.756	49.5738	79.0891	41.0083	58.9961	84.7389	39.9361	61.4408	79.6326	53.4988	67.8912	106.065	40.8419	66.9365	120.109	42.6952	61.7886	88.6771	39.948	63.2487	96.909	22.1424	34.8295	84.6058	17.9912	27.5811	69.2259	49.526	80.0463	124.665	20.4045	31.2053	71.2314	49.526
TAG52:2 µmol/L	199.925	274.599	379.402	156.67	243.646	333.935	210.864	322.701	474.93	221.847	342.004	481.183	201.441	278.138	391.16	165.988	264.54	361.498	198.734	262.717	406.334	189.711	211.08	360.178	233.103	307.498	426.209	185.772	335.668	560.199	205.613	272.28	413.215	188.626	293.011	530.623	103.465	160.85	393.124	106.192	136.143	459.662	217.845	372.752	576.152	108.107	148.496	432.575	217.845
TAG52:3 µmol/L	140.201	228.042	357.293	157.1	250.527	337.368	150.234	280.302	382.809	219.778	358.335	447.745	141.226	242.924	363.579	168.768	264.62	380.741	133.356	229.503	378.988	80.2262	150.303	233.516	185.876	209.334	308.593	132.412	256.065	437.738	143.305	220.322	355.666	121.748	206.37	406.225	103.517	151.182	353.035	107.11	170.934	451.554	238.814	323.272	463.473	103.678	161.058	349.305	238.814
TAG52:4 µmol/L	51.4444	78.6703	145.721	59.7834	89.8852	135.547	55.8981	88.5236	131.521	72.9377	139.858	185.714	51.8098	80.9324	143.61	63.0374	98.3413	154.813	44.8085	76.0523	137.943	22.3345	51.8462	65.8827	50.9589	73.2161	107.471	50.1618	81.0087	165.171	47.6478	75.4953	135.129	43.5827	62.799	134.509	47.8388	60.972	133.73	45.173	77.1838	224.422	74.87	139.437	167.79	46.6633	69.0779	130.575	74.87
TAG52:5 µmol/L	9.30931	16.113	25.6992	12.0182	15.4905	24.0172	12.2078	17.8021	25.6103	13.4859	22.3457	34.1645	10.0755	16.1757	25.6147	12.103	17.437	27.4346	9.36423	14.4258	23.8781	4.69364	9.16779	13.0029	10.8946	15.6498	21.0202	10.358	15.9191	31.09	9.77494	14.6938	23.2986	8.08365	13.5039	28.8889	10.1029	11.676	20.8964	9.01865	14.8855	46.3567	15.438	19.8629	30.0917	9.89726	13.2807	23.1627	15.438
TAG52:6 µmol/L	1.58495	2.36784	3.74469	1.37005	1.83066	3.32838	1.7978	2.95443	4.26978	1.60738	3.22287	4.8392	1.61613	2.50472	3.76907	1.42799	2.03089	3.63286	1.66935	2.39591	3.61768	0.940093	1.61609	2.99158	1.83561	2.957	4.60778	1.7857	3.06577	5.30534	1.70646	2.497	3.8114	1.53306	2.58469	4.61015	1.14611	1.82837	2.47289	0.957212	1.88063	6.35913	2.35679	2.86481	3.7132	1.15703	1.8545	3.37348	2.35679
TAG52:7 µmol/L	0.359752	0.503607	0.876535	0.286227	0.363247	0.536162	0.383009	0.672356	1.02721	0.341863	0.561105	1.05312	0.3663	0.516239	0.922146	0.291415	0.38872	0.632543	0.375644	0.572595	0.992371	0.484216	0.607025	1.09228	0.506756	0.796977	1.19832	0.486836	0.845055	1.30163	0.390747	0.640153	1.02815	0.487277	0.747511	1.21011	0.278062	0.476456	0.890166	0.160792	0.213918	0.697688	0.554211	0.707198	1.11489	0.200234	0.375318	0.799297	0.554211
TAG52:8 µmol/L	0.0973486	0.135222	0.176878	0.0999172	0.115232	0.157256	0.10375	0.162158	0.205295	0.106437	0.169575	0.215803	0.0998726	0.138463	0.182106	0.100116	0.131004	0.185041	0.110123	0.141982	0.194205	0.138258	0.144886	0.163229	0.118797	0.168216	0.208112	0.124319	0.159088	0.251871	0.110461	0.148377	0.201512	0.126118	0.155443	0.233334	0.0687416	0.124724	0.215801	0.0397317	0.131381	0.245416	0.150526	0.210115	0.253407	0.0590903	0.128053	0.201564	0.150526
TAG54:0 µmol/L	0.556939	0.865563	1.16447	0.506403	0.709029	0.99824	0.720975	0.878945	1.12778	0.795904	0.973138	1.4695	0.588649	0.872664	1.16381	0.575251	0.797227	1.21428	0.57978	0.868117	1.17826	0.642945	1.01171	1.21637	0.668989	1.03431	1.6964	0.7215	0.999146	1.80454	0.600827	0.884044	1.21381	0.710898	0.999146	1.36327	0.586887	0.729312	1.11835	0.329656	0.556794	0.715052	0.874704	1.04187	2.25901	0.4483	0.648666	0.842224	0.874704
TAG54:1 µmol/L	4.85686	7.06859	12.0441	3.75688	5.19051	9.24344	5.27128	8.2449	11.9616	6.11354	10.0041	15.1216	5.06129	7.1654	12.0251	4.1142	7.07296	11.5498	4.99383	7.58788	11.2046	5.88187	7.94009	11.2925	5.7589	8.89742	16.7761	5.20602	7.76565	13.7457	5.19013	7.78356	12.1347	5.30611	7.76565	12.8625	2.89104	5.61064	9.06167	2.95893	3.81825	9.11693	8.32258	9.20377	18.118	2.95969	4.72249	8.8681	8.32258
TAG54:2 µmol/L	26.2733	36.4543	51.7965	20.5594	28.157	46.5661	27.5105	46.3063	61.6973	34.426	49.5201	70.5894	27.0088	36.5786	57.4357	22.4973	41.1164	55.6377	24.3095	37.0872	57.958	18.4179	33.7898	53.3459	26.9004	39.9505	68.4673	25.4833	39.3759	57.3238	25.7891	38.0528	63.2511	24.5559	37.8911	53.1028	19.3275	29.2436	46.417	21.6329	29.5904	46.6723	31.5867	48.3464	68.5979	20.1724	29.417	43.95	31.5867
TAG54:3 µmol/L	62.1337	91.4264	122.672	54.2809	78.2715	103.559	61.4973	97.8834	143.321	82.7546	113.536	141.223	62.1337	92.9655	125.685	57.3208	91.1221	126.355	58.8458	81.073	126.834	33.8769	69.421	88.4051	58.5915	92.0577	114.869	62.5661	73.821	138.07	58.9413	85.7624	120.22	60.1686	71.2044	124.948	49.8007	83.2123	99.8163	68.5459	88.8615	130.273	67.7512	107.51	144.788	57.454	86.0369	97.3802	67.7512
TAG54:4 µmol/L	46.6412	79.6623	112.811	53.9349	71.2738	98.7688	48.5295	78.7411	110.895	60.5548	100.249	140.505	46.9623	79.0189	112.708	54.3793	78.7411	109.518	43.7014	68.0511	101.891	22.7488	52.7761	54.8679	45.013	70.7445	88.67	43.6821	55.7684	137.247	44.4825	68.7616	96.716	40.3626	53.6628	130.701	48.0054	63.5221	80.9309	66.3163	70.0128	157.82	62.3161	91.5665	122.862	55.0601	68.4815	100.595	62.3161
TAG54:5 µmol/L	25.7252	41.8655	68.4952	27.8521	37.3193	54.906	28.3554	42.8853	64.5166	28.7844	53.2981	84.3548	26.3964	42.2032	67.7325	28.7844	39.9595	64.6245	22.8576	37.1021	57.8563	11.3823	24.4204	29.9244	24.56	34.322	48.1479	24.0729	33.4013	82.9473	23.7424	36.7031	56.4201	20.1069	30.7393	80.9351	22.6469	29.7758	52.414	29.4987	34.0817	114.111	32.4429	48.8326	71.0729	27.7749	31.9244	64.156	32.4429
TAG54:6 µmol/L	10.415	15.8017	25.6266	9.69922	13.7195	18.9238	13.0081	17.3331	26.3163	11.2007	19.3859	31.4044	10.6682	16.2817	25.6266	9.90946	16.133	24.1755	9.89418	15.1484	24.4911	5.68053	9.88092	17.1821	10.5606	16.0965	24.4092	9.70341	22.3439	30.9961	10.1142	15.3455	24.4154	8.31616	17.1386	30.2436	8.98898	10.624	20.6575	8.59859	10.6367	52.6743	11.5437	18.8612	25.6383	9.12693	10.6303	24.2518	11.5437
TAG54:7 µmol/L	2.71468	3.90657	6.30494	2.05157	3.01978	4.71524	3.02679	4.75136	6.56954	2.59332	4.21925	7.70945	2.86218	4.19712	6.37256	2.35016	3.21252	5.34407	2.83632	4.20394	6.42099	1.41558	3.47484	5.90664	2.65426	4.24962	8.90384	2.98781	4.9622	8.87412	2.83587	4.22577	6.61783	2.82859	4.0677	7.98956	1.87265	3.24125	3.66262	1.56471	2.28771	11.9243	3.0124	4.36279	7.09609	1.82184	3.20646	6.48121	3.0124
TAG54:8 µmol/L	0.343349	0.579563	0.927238	0.250524	0.360201	0.670543	0.421688	0.740017	1.04172	0.313491	0.532315	1.02746	0.368198	0.615012	0.97141	0.265531	0.395314	0.737228	0.372558	0.623343	0.99708	0.191927	0.582689	0.785874	0.355847	0.707128	1.47765	0.400806	0.557706	1.42518	0.369273	0.636244	1.02038	0.375446	0.557706	1.37019	0.180318	0.454591	0.62042	0.184678	0.325604	1.40286	0.487609	0.639892	1.21654	0.196613	0.39934	0.990052	0.487609
TAG56:10 µmol/L	0.0444856	0.0630034	0.106115	0.041951	0.0625365	0.0891809	0.0413297	0.0721812	0.109461	0.0553384	0.09195	0.121126	0.0429181	0.063817	0.106257	0.0459323	0.0738788	0.109509	0.0425765	0.0700649	0.10614	0.0356093	0.0586329	0.0765106	0.0412067	0.066481	0.1246	0.0451061	0.064276	0.0942554	0.0424078	0.0684859	0.106166	0.0426061	0.064276	0.0845106	0.0544895	0.0905025	0.135943	0.0496529	0.0646592	0.140198	0.082393	0.114463	0.130335	0.0517442	0.0822028	0.129	0.082393
TAG56:1 µmol/L	0.220966	0.326929	0.546617	0.183329	0.22613	0.347215	0.228958	0.349813	0.462228	0.259516	0.405366	0.615213	0.225719	0.338579	0.541814	0.19563	0.27172	0.477344	0.212536	0.307713	0.458492	0.261188	0.336247	0.426209	0.276023	0.397188	0.658497	0.256076	0.405694	0.651112	0.235005	0.334074	0.511546	0.256864	0.387533	0.586489	0.13128	0.243684	0.329806	0.137143	0.200776	0.376294	0.273533	0.353407	1.0153	0.143187	0.220955	0.329501	0.273533
TAG56:2 µmol/L	0.68997	0.976636	1.50353	0.507161	0.66872	1.03561	0.793866	1.11211	1.78556	0.748113	1.28874	2.09075	0.700552	0.996855	1.56328	0.567856	0.789025	1.47861	0.69353	1.01313	1.48116	0.701784	0.97188	1.51682	0.675265	1.29468	2.01389	0.764839	1.18324	1.89369	0.693135	1.02845	1.54942	0.719715	1.18324	1.56085	0.410247	0.775814	1.01747	0.411961	0.672339	1.28248	1.24083	1.47209	2.89832	0.411123	0.724076	0.98933	1.24083
TAG56:3 µmol/L	2.13348	3.55297	5.24191	1.65693	2.43026	3.8606	2.3063	3.80226	5.28199	3.00331	4.12552	6.04622	2.19857	3.69645	5.24191	1.89807	3.01126	4.67118	2.04871	3.26399	5.39608	1.35907	2.63848	4.39405	2.37916	3.45154	6.77628	2.61408	3.22445	5.85728	2.13719	3.30593	5.43882	2.38594	3.15366	4.98738	1.7403	2.75952	3.43945	1.89542	2.28397	5.10334	3.61414	5.1921	7.38804	1.84273	2.33162	3.37998	3.61414
TAG56:4 µmol/L	2.78514	4.47545	6.40794	2.58568	3.59402	5.63318	3.28904	5.23139	6.79128	3.50902	5.02037	7.62848	2.89109	4.55776	6.50504	2.89057	4.25912	6.64225	2.96019	4.26005	6.9478	1.69296	3.26043	5.31931	3.1967	5.17539	6.73677	3.28985	5.00822	6.91919	3.03522	4.30711	6.83694	3.01399	4.66333	6.17272	2.18732	3.26176	5.04336	2.39164	3.38413	7.56386	4.38943	6.77078	9.01277	2.29978	3.32294	4.97748	4.38943
TAG56:5 µmol/L	5.21283	7.62745	10.808	5.3125	6.77041	9.54642	6.21761	8.56452	11.9589	5.78514	8.14614	12.2116	5.26926	8.11469	10.9161	5.37332	7.10489	10.4419	5.34884	7.76791	10.6222	4.00026	5.33411	12.2787	6.82228	9.53838	12.2266	6.14172	9.2785	12.9241	5.72618	7.87398	11.3282	5.33247	7.49502	12.8247	3.21699	5.06823	9.06787	3.99141	7.37618	11.2679	6.54909	10.6252	14.128	3.88534	6.22221	8.82128	6.54909
TAG56:6 µmol/L	7.4646	11.5551	14.4126	6.8036	8.96875	12.2428	9.64279	11.656	16.7161	6.79937	11.3625	15.9811	7.65731	11.5551	15.1665	6.84053	9.70732	13.8675	8.27603	11.7465	15.2603	5.38385	9.08612	16.1421	9.00134	12.4649	17.0306	9.14	12.1288	18.9371	8.35429	11.9077	15.6684	8.02722	11.8841	18.1916	5.43432	7.61004	11.2729	5.59252	9.6803	14.0101	9.17832	14.9428	16.879	5.52061	8.64517	11.1749	9.17832
TAG56:7 µmol/L	6.56062	9.63126	14.0951	4.97048	6.84318	10.042	8.2717	10.8701	17.88	5.30839	8.93415	13.6891	6.80786	9.80909	14.1417	5.05543	7.54199	10.9432	7.06828	10.4122	14.923	4.71045	10.7264	16.0908	8.51745	12.2289	19.4583	8.08026	10.3398	21.8664	7.38027	11.1158	16.4027	7.74909	10.3398	21.0608	5.45337	6.39862	10.8787	4.14012	5.9544	11.0265	8.77384	12.949	16.8366	4.51051	6.37262	10.4887	8.77384
TAG56:8 µmol/L	2.53198	4.27627	6.13954	1.83967	2.63444	4.87765	2.91556	4.67978	9.09609	2.08312	3.42114	6.08722	2.81455	4.43589	6.78546	1.86556	2.9739	5.10299	2.71693	4.80574	7.08535	1.59424	5.04242	7.5276	2.93561	5.51156	9.72875	2.98915	4.42511	11.0277	2.7448	4.93299	7.553	2.67084	4.92802	9.66911	1.94941	3.80388	5.18522	1.49663	1.99459	5.24806	3.33914	6.77647	9.96254	1.68154	3.18833	5.16468	3.33914
TAG56:9 µmol/L	0.347058	0.643433	1.09025	0.2145	0.405176	0.660746	0.465056	0.805057	1.2376	0.345646	0.557289	1.28851	0.384962	0.668978	1.09757	0.27982	0.422098	0.815773	0.429616	0.718609	1.18011	0.198501	0.83722	1.1419	0.373898	0.814496	1.72896	0.418713	0.607616	1.86722	0.415266	0.735001	1.2763	0.364323	0.828709	1.63478	0.231066	0.62506	1.06033	0.194409	0.268866	1.01603	0.553428	0.87001	1.32721	0.22422	0.495798	1.0346	0.553428
TAG58:10 µmol/L	0.274179	0.530022	1.07353	0.176569	0.343958	0.67609	0.386055	0.753778	1.28611	0.25224	0.433183	0.8527	0.305481	0.563241	1.08542	0.210616	0.385386	0.746672	0.367282	0.68716	1.18542	0.200182	0.833203	1.46344	0.428019	0.873284	1.70314	0.349154	0.677953	1.92807	0.378241	0.733695	1.31596	0.320197	0.712301	1.72685	0.18131	0.684469	0.992579	0.183278	0.214521	0.718417	0.477462	0.708381	1.25151	0.182427	0.474453	0.840653	0.477462
TAG58:2 µmol/L	0.0929265	0.162203	0.2846	0.0823494	0.125923	0.174752	0.0947866	0.135553	0.227397	0.158977	0.208778	0.342414	0.0938408	0.149937	0.26733	0.0865412	0.139173	0.236454	0.0953028	0.140462	0.222248	0.0978333	0.151115	0.199831	0.112227	0.163984	0.350921	0.121031	0.201365	0.3238	0.0984346	0.142754	0.23826	0.106366	0.19429	0.280021	0.04877	0.0981777	0.188018	0.0744069	0.121503	0.333117	0.0871864	0.222459	0.443011	0.0737842	0.103162	0.199757	0.0871864
TAG58:3 µmol/L	0.107916	0.178002	0.256793	0.0749759	0.102489	0.165064	0.0957186	0.183302	0.264988	0.129929	0.197997	0.334991	0.106612	0.178712	0.256793	0.0891145	0.127343	0.235175	0.10623	0.162362	0.241731	0.0673176	0.144722	0.411298	0.118464	0.219634	0.348282	0.125115	0.183129	0.305054	0.107033	0.167014	0.260917	0.105815	0.183129	0.305054	0.0729396	0.107819	0.164965	0.116053	0.156891	0.274706	0.164433	0.284808	0.517894	0.0817961	0.150477	0.192321	0.164433
TAG58:5 µmol/L	0.082183	0.118346	0.183662	0.0691396	0.102617	0.155465	0.101817	0.14701	0.203261	0.0972965	0.146403	0.226497	0.0864068	0.122247	0.188082	0.0736674	0.112507	0.178175	0.0826276	0.13127	0.176717	0.059343	0.104977	0.17749	0.0941453	0.148989	0.196355	0.0981922	0.138736	0.231165	0.0890615	0.140862	0.186396	0.0960344	0.122372	0.186968	0.0626347	0.0834112	0.19146	0.0630822	0.100412	0.163526	0.158518	0.226062	0.289013	0.0633273	0.0919114	0.183941	0.158518
TAG58:6 µmol/L	0.540966	0.898958	1.20029	0.53727	0.722379	1.01125	0.812557	1.00325	1.34234	0.548698	0.944447	1.29255	0.598841	0.908773	1.2317	0.54596	0.828464	1.0839	0.657277	0.935156	1.30959	0.433065	0.693871	1.53647	0.806079	1.13736	1.58166	0.774204	1.03648	1.50955	0.703466	0.963662	1.3435	0.729746	0.865976	1.50955	0.415339	0.558621	1.37136	0.369868	0.717434	0.917637	0.844477	1.1953	1.47137	0.386925	0.638027	1.01787	0.844477
TAG58:7 µmol/L	1.06049	1.66627	2.63935	0.864807	1.26948	1.83277	1.37034	1.90732	2.74417	1.04778	1.59207	2.41676	1.14598	1.73243	2.67211	0.926304	1.28771	1.95813	1.31142	1.95359	2.96615	0.837335	1.74864	3.50285	1.45263	2.23503	3.95394	1.34991	1.92099	3.72676	1.38566	2.00167	3.01634	1.3391	1.87081	3.64108	0.939186	1.11733	2.02793	0.687626	0.983241	1.75317	1.47034	2.14664	2.80173	0.78906	1.10851	1.88342	1.47034
TAG58:8 µmol/L	0.955239	1.90016	3.12153	0.755897	1.2447	2.00116	1.36929	2.74864	4.6974	0.8787	1.43527	2.8625	0.989992	1.97921	3.4242	0.806815	1.27027	2.10879	1.26952	2.25907	3.92446	0.743902	2.55446	5.5177	1.58821	2.89344	5.45891	1.26834	2.31146	5.8917	1.36485	2.26358	4.26647	1.23694	2.31146	5.6893	0.998372	1.8026	3.05715	0.642829	0.738328	2.01507	1.60617	2.23981	4.2894	0.693101	1.42285	2.19473	1.60617
TAG58:9 µmol/L	0.635899	1.21632	2.12691	0.473515	0.772579	1.44684	0.840956	1.6538	2.65124	0.644671	0.930098	1.87903	0.65586	1.25218	2.17484	0.544058	0.790531	1.51645	0.844082	1.4456	2.49779	0.448225	1.75536	2.74625	0.945731	1.76568	2.87918	0.715821	1.80758	3.8779	0.854983	1.49153	2.57368	0.617319	1.80758	3.1096	0.68844	1.33278	1.96121	0.395204	0.4725	1.60576	0.979112	1.56212	2.44744	0.433231	1.01962	1.66933	0.979112
TAG60:10 µmol/L	0.0492664	0.102323	0.196911	0.0353325	0.0600545	0.117868	0.0675514	0.144829	0.223444	0.036632	0.0667501	0.146468	0.0531203	0.11921	0.201348	0.0356578	0.0624462	0.131551	0.0733409	0.129827	0.276369	0.0588726	0.152162	0.327853	0.086833	0.190986	0.36468	0.0695713	0.160283	0.302464	0.0782997	0.148369	0.296673	0.0695713	0.160283	0.302464	0.0315531	0.0866048	0.2039	0.0233377	0.0360338	0.0793207	0.0931285	0.187548	0.269367	0.0280447	0.063283	0.13288	0.0931285
TAG60:11 µmol/L	0.0455124	0.110401	0.266131	0.0253515	0.0551779	0.116768	0.09322	0.148641	0.342404	0.0349539	0.0866589	0.16831	0.0508199	0.123532	0.289242	0.0322369	0.0663369	0.142464	0.0666184	0.158129	0.378679	0.0557144	0.239107	0.625936	0.0725304	0.225267	0.514858	0.0673155	0.177346	0.409654	0.0694472	0.167534	0.394502	0.0579597	0.18326	0.409654	0.0276589	0.134009	0.232759	0.0199436	0.033631	0.0663862	0.0744195	0.204941	0.301462	0.0259861	0.0466509	0.187958	0.0744195
TAG60:12 µmol/L	0.018558	0.0592046	0.212404	0.00894497	0.0214307	0.0639714	0.0398701	0.120681	0.331045	0.0173908	0.0358852	0.0936674	0.0201723	0.0706125	0.222916	0.0118722	0.0240849	0.0741562	0.0322292	0.114218	0.282221	0.0268089	0.176293	0.487822	0.0213463	0.167845	0.543568	0.0143475	0.118448	0.323557	0.0318351	0.124417	0.333119	0.0172495	0.12749	0.356599	0.00559867	0.118119	0.176839	0.00485178	0.00945092	0.032983	0.0489107	0.100214	0.195258	0.00511461	0.0239141	0.119364	0.0489107
DAG(16:1/18:0) µmol/L	0.032849	0.0469353	0.066963	0.0320297	0.0392473	0.0644737	0.0325317	0.0407771	0.0512292	0.0348295	0.0438851	0.0677643	0.032849	0.0438353	0.0661481	0.0327615	0.0401831	0.0671643	0.0327313	0.0445875	0.0669215	0.0253427	0.0314426	0.0636475	0.0314537	0.0385697	0.0643995	0.0306631	0.0408981	0.0759863	0.0326841	0.0433253	0.0659061	0.0274222	0.0405946	0.0686827	0.0324069	0.053749	0.111454	0.0274194	0.0317917	0.039875	0.0422227	0.0501712	0.0604353	0.0300936	0.0375973	0.0580167	0.0422227
DAG(16:0/18:1) µmol/L	0.0764082	0.114702	0.161611	0.0574507	0.0888476	0.135979	0.0861565	0.13115	0.200353	0.097268	0.141061	0.221934	0.0774975	0.118784	0.165494	0.0673108	0.108015	0.169482	0.0802034	0.114737	0.169528	0.0545293	0.112852	0.152909	0.0984478	0.121441	0.166749	0.100178	0.144033	0.317884	0.0831839	0.116099	0.169186	0.094294	0.132722	0.247169	0.0435214	0.069889	0.177065	0.0464303	0.063744	0.121428	0.118834	0.216454	0.290396	0.0458977	0.0668165	0.164634	0.118834
DAG(16:0/18:2) µmol/L	0.0428248	0.0640344	0.0860498	0.0398966	0.0562427	0.0871342	0.0480918	0.0603668	0.0922412	0.0601255	0.0928407	0.130115	0.0433958	0.063663	0.0866047	0.0425129	0.0669935	0.108084	0.0369802	0.0611757	0.0853521	0.0260865	0.0452054	0.0771735	0.0439514	0.0569084	0.0762268	0.0558677	0.0885955	0.146709	0.0384151	0.0574055	0.0810004	0.0408414	0.0814847	0.116143	0.0306952	0.04536	0.0919686	0.0364855	0.0385751	0.108097	0.0992996	0.124698	0.1896	0.035976	0.0410955	0.0857094	0.0992996
DAG(16:1/18:2) µmol/L	0.011456	0.01562	0.0201856	0.0115062	0.016435	0.0242262	0.0135813	0.0190987	0.0253601	0.0148031	0.0221803	0.0314642	0.0119905	0.0161481	0.0209403	0.0124131	0.0181361	0.0257247	0.0106933	0.0148795	0.0238799	0.0066567	0.00957539	0.0150942	0.0116294	0.0179404	0.0210169	0.0136059	0.0222411	0.0293673	0.0107519	0.0155517	0.0232425	0.0112511	0.0166964	0.0289696	0.0123081	0.0156782	0.021431	0.00886082	0.0139003	0.0343928	0.0156348	0.0267717	0.0314474	0.0108598	0.0147892	0.0227871	0.0156348
DAG(16:1/20:0) µmol/L	0.0975452	0.121362	0.167991	0.0885046	0.12604	0.156076	0.10663	0.127167	0.16441	0.0771833	0.110083	0.176414	0.0991462	0.122128	0.165747	0.0870715	0.117732	0.157016	0.0924114	0.115716	0.158117	0.0729371	0.0831858	0.170508	0.0736853	0.0998309	0.122605	0.0966354	0.115602	0.182205	0.087692	0.112084	0.150376	0.0831858	0.113095	0.176154	0.0943685	0.119431	0.146424	0.0551736	0.0936015	0.109279	0.0840828	0.127448	0.198398	0.0860073	0.100801	0.131822	0.0840828
DAG(18:1/18:1) µmol/L	0.25135	0.42042	0.610692	0.21594	0.386114	0.569722	0.295308	0.411941	0.638473	0.328488	0.531244	0.774334	0.253473	0.420188	0.610692	0.246977	0.43456	0.666875	0.243158	0.421928	0.611407	0.153246	0.275419	0.512156	0.25763	0.463588	0.626008	0.332313	0.497473	0.666121	0.244088	0.431833	0.614773	0.263313	0.4375	0.62476	0.184735	0.308161	0.673961	0.221705	0.322106	0.599686	0.512691	0.589428	0.713321	0.18881	0.315133	0.639802	0.512691
DAG(18:1/18:2) µmol/L	0.133689	0.224817	0.370418	0.144724	0.260285	0.343402	0.151534	0.230452	0.330746	0.204016	0.344611	0.510549	0.137385	0.2271	0.360789	0.160085	0.296255	0.40008	0.118267	0.209127	0.338555	0.0757932	0.13192	0.206483	0.134539	0.200072	0.286059	0.173429	0.251027	0.438799	0.118778	0.208434	0.3243	0.112657	0.219389	0.327267	0.147298	0.195531	0.398693	0.150898	0.164037	0.589803	0.239702	0.403651	0.577651	0.149026	0.179784	0.37434	0.239702
DAG(20:0/20:0) µmol/L	0.0430309	0.0711574	0.110844	0.0331643	0.0500999	0.0914729	0.0353132	0.0551307	0.0994933	0.0299863	0.054476	0.114436	0.0414767	0.0702699	0.110653	0.0325272	0.0529826	0.0941849	0.0415629	0.0657969	0.109368	0.0255641	0.0545519	0.0905701	0.0402524	0.0545684	0.0636363	0.0344135	0.0536751	0.0936211	0.0415398	0.0619096	0.103503	0.0311917	0.0536751	0.0914281	0.0360501	0.0698615	0.0896765	0.0293232	0.0531584	0.131115	0.0258961	0.0452697	0.0787879	0.0366264	0.0615099	0.106356	0.0258961
DAG(18:2/22:4) µmol/L	0.000941224	0.00162703	0.00277014	0.000645925	0.00112943	0.00239191	0.000766849	0.00206485	0.003307	0.000447564	0.00108298	0.00250694	0.000941224	0.00164042	0.00279729	0.000597252	0.00112425	0.00242897	0.000915629	0.00167634	0.00299553	0.000725035	0.00195575	0.00445314	0.000448574	0.00109015	0.00225407	0.00113785	0.00165636	0.00299482	0.000767349	0.00156273	0.00296865	0.00111491	0.00165636	0.00338042	0.000712021	0.00103703	0.00145865	0.000495515	0.000739233	0.00149552	0.00153704	0.00304842	0.00553481	0.000716053	0.00100754	0.0013991	0.00153704
DAG(18:0/22:6) µmol/L	0.0093305	0.0150775	0.0265042	0.00805557	0.0138809	0.0234952	0.0117948	0.0158951	0.0270358	0.00938834	0.0187088	0.0317439	0.00970006	0.0154106	0.0267622	0.00917453	0.0145979	0.027779	0.009092	0.0152491	0.0251943	0.00903387	0.015065	0.0378801	0.00838247	0.0109714	0.0197832	0.0130429	0.0184887	0.0413194	0.00901828	0.0137411	0.0234741	0.0106395	0.0184887	0.0389384	0.0102825	0.0168599	0.0222711	0.00350636	0.0113781	0.0128201	0.00915659	0.0177628	0.0617201	0.00787232	0.0114849	0.0174237	0.00915659
CE(22:6) µmol/L	144.072	286.015	450.58	98.3033	147.53	323.78	115.077	281.224	431.395	107.84	181.068	510.041	139.834	286.015	443.813	103.733	153.493	357.279	189.578	343.614	719.396	215.38	328.427	757.909	124.925	277.211	745.515	224.184	384.264	663.021	180.856	313.456	719.935	222.489	354.675	663.021	203.94	321.676	547.219	55.2738	68.1055	232.347	239.653	387.94	908.384	73.674	232.347	363.748	239.653
CE(20:0) µmol/L	22.0433	38.53	57.8775	17.5648	27.2468	46.4746	17.9295	29.0905	52.2023	15.5624	30.8573	64.1516	20.97	35.563	57.6392	17.3583	27.8741	49.9146	21.3925	35.3857	56.5687	9.05044	24.3866	46.2158	20.6179	28.0553	39.1693	18.4783	26.5878	56.9186	21.2076	33.0532	52.1629	14.4533	26.5878	53.7736	15.3591	33.9215	40.4502	19.6871	33.0465	74.2196	12.127	24.1461	39.7786	16.0381	33.484	57.164	12.127
CE(16:0) µmol/L	44.8148	59.2096	76.7744	36.5448	47.9996	68.8654	41.4748	57.436	67.4774	44.842	57.5638	73.7075	43.9349	58.7835	75.7966	40.7327	49.2781	70.6095	47.9081	61.1227	83.8642	48.8817	50.6558	80.1721	44.665	53.2672	83.4259	47.4705	62.4252	81.1597	47.2686	57.2548	83.0584	48.7357	59.602	81.1597	37.7099	55.837	73.5455	35.3036	43.01	46.7656	51.3899	64.0711	83.4233	37.7575	45.404	68.4877	51.3899
CE(16:1) µmol/L	14.6219	24.2436	48.7067	12.9913	18.8242	39.4229	15.4189	21.5352	39.6219	15.9475	30.9519	46.1824	15.0521	23.4355	46.2503	14.1379	22.1266	41.8749	15.9382	33.8829	60.221	16.4083	28.1181	89.6343	17.7084	34.5065	65.4119	19.6406	36.513	69.5103	16.1833	34.5065	61.2779	19.6406	31.2505	69.5103	11.5933	19.5673	59.8567	8.16413	11.824	23.2067	25.0562	37.3014	50.1659	9.85704	18.9696	31.3436	25.0562
CE(18:0) µmol/L	10.1326	14.009	18.3685	8.58121	11.2939	16.917	9.67791	12.1442	17.8342	11.2184	14.2382	17.8485	9.94133	13.7042	18.1629	9.22317	12.7815	17.3852	10.1722	13.8426	18.7962	11.4622	14.1976	18.7209	9.84362	12.1555	16.669	11.2779	14.6981	22.654	9.97018	13.4892	18.4817	11.3404	14.5796	20.1659	9.53661	10.7521	19.2967	7.29221	8.69476	10.5901	12.2604	16.8994	21.8303	8.38128	10.0184	13.8698	12.2604
CE(18:1) µmol/L	210.955	296.198	441.744	183.333	239.699	356.991	197.563	279.358	367.104	230.171	304.836	414.223	208.266	294.119	424.082	202.431	264.931	372.288	232.996	294.254	496.374	210.394	281.77	435.107	214.1	284.259	426.182	266.867	339.389	461.866	228.891	293.31	467.851	240.651	325.215	446.132	194.952	316.97	437.806	186.247	197.19	226.796	256.759	350.94	497.632	194.708	207.316	356.369	256.759
CE(18:2) µmol/L	1248.8	1815.89	2777.17	1333.53	1682.69	2524.09	1181.84	1584.09	2386.39	1387.61	2088.66	2605.72	1237.22	1788.63	2547.55	1373.24	1758.52	2525.15	1369.32	1822.64	3084.2	1088.79	1461.87	2047.08	955.135	1614.83	2525.94	1556.59	1800.58	2880.14	1284.9	1798.75	2910.72	1324.36	1720.3	2466.22	1492.06	2227.39	2797.6	920.84	1489.51	2011.79	1592.34	2281.32	3790.13	1375.35	1676.33	2541.2	1592.34
CE(18:3) µmol/L	80.9588	122.671	178.893	67.96	95.8602	173.574	70.6074	115.824	150.473	79.3593	121.647	191.586	79.4626	121.453	169.044	73.8847	99.6425	179.302	82.3477	121.338	205.888	90.6	128.212	165.69	82.4685	107.283	186.804	106.348	135.878	203.657	82.4674	116.561	195.066	94.718	131.392	177.044	71.5649	101.606	151.918	65.6695	77.8056	99.1286	103.651	159.793	272.738	68.9411	82.51	112.907	103.651
CE(20:3) µmol/L	61.0226	96.2645	159.769	60.6565	78.3421	143.643	59.7679	78.8748	126.631	71.9591	95.7934	152.32	61.0226	88.2435	147.117	61.9957	89.4392	149.863	68.5953	94.0031	164.936	65.3569	72.6811	132.503	63.6151	84.6386	124.07	81.9088	108.642	156.282	67.1377	92.5246	153.524	70.4035	97.3994	137.732	56.3244	74.3345	144.966	45.8074	57.9911	117.667	79.5725	95.0734	165.551	56.2883	66.9347	135.48	79.5725
CE(20:4) µmol/L	562.163	795.948	1436	526.299	654.917	1428.65	576.437	684.916	996.878	565.622	737.208	1564.74	563.402	773.802	1378.93	528.413	688.724	1443.83	567.456	849.128	1520.54	521.688	577.745	1316.21	578.12	778.753	1237.21	703.649	859.161	1364.48	576.534	833.554	1459.83	556.35	828.263	1364.48	559.519	739.57	1719.38	389.656	669.796	872.322	552.569	893.36	1880.83	448.249	704.683	1335.76	552.569
CE(20:5) µmol/L	97.2743	209.664	380.53	39.2182	96.6175	195.199	99.3597	244.642	440.54	68.5156	106.303	263.464	97.2743	212.055	392.043	55.6407	100.246	197.198	96.7576	264.048	640.374	147.343	321.697	871.508	105.486	249.197	736.867	177.644	279.884	458.534	101.26	263.915	652.689	177.644	295.882	458.534	70.2943	231.72	386.278	35.4625	37.2525	127.388	148.122	195.049	426.238	37.642	127.388	297.202	148.122
PE(14:0/20:4) µmol/L	0.0149373	0.0243444	0.0373569	0.00926752	0.0170205	0.0324139	0.0137813	0.0277106	0.0409566	0.015246	0.0246343	0.0383202	0.014138	0.024548	0.0374772	0.0116651	0.020828	0.035705	0.019519	0.0299676	0.0466613	0.0225748	0.0331896	0.0546614	0.0170439	0.0298268	0.0533286	0.0193499	0.0295401	0.0462537	0.0195149	0.0298268	0.0467618	0.0208849	0.0305138	0.0486735	0.00850306	0.0233531	0.0337057	0.00906955	0.0111614	0.0243689	0.0135693	0.0248912	0.0438997	0.00889226	0.0124451	0.0317263	0.0135693
PE(16:0/16:0) µmol/L	0.0891968	0.141751	0.233415	0.081472	0.115056	0.162734	0.0914642	0.148806	0.257263	0.0667568	0.125942	0.246127	0.0891968	0.142569	0.233415	0.0804266	0.118482	0.172726	0.0963165	0.144679	0.25095	0.14373	0.192319	0.267562	0.138769	0.249692	0.397739	0.113268	0.172712	0.283073	0.0976811	0.165901	0.286017	0.119011	0.176516	0.268719	0.0384218	0.119198	0.19806	0.0380078	0.0760697	0.170845	0.0784231	0.170954	0.492702	0.039399	0.097634	0.19141	0.0784231
PE(16:0/16:1) µmol/L	0.0309433	0.045869	0.0655067	0.029473	0.0466998	0.0881069	0.0359676	0.0738297	0.123718	0.0374583	0.0609305	0.107364	0.032372	0.0480974	0.0798412	0.0302944	0.0526544	0.0927812	0.0385376	0.0661714	0.119131	0.0656253	0.104191	0.142275	0.0455475	0.0780327	0.260302	0.0385313	0.0628139	0.157913	0.0389761	0.0672948	0.137654	0.0481905	0.0830839	0.149056	0.0209342	0.0422988	0.0770244	0.0296498	0.0496469	0.103635	0.0527691	0.0983335	0.157117	0.0269994	0.0459729	0.0713368	0.0527691
PE(16:0/18:1) µmol/L	1.07575	1.50908	2.47089	0.956803	1.55907	2.09284	1.64391	2.31049	2.91625	1.27346	1.85419	2.87752	1.14577	1.66501	2.59304	1.08146	1.66448	2.39977	1.33707	1.92717	2.81605	1.70874	2.09945	2.47683	1.71569	2.55182	4.11442	1.55264	2.30604	3.03936	1.42896	2.00643	3.2276	1.65877	2.21481	2.67297	0.808415	1.43179	2.03904	1.40932	1.91534	2.9297	1.556	2.16078	4.14089	0.987885	1.72908	2.54928	1.556
PE(16:0/18:2) µmol/L	2.84327	4.19103	6.66833	2.78526	4.13098	7.51012	3.99885	5.91498	7.32349	2.81733	6.27019	10.5946	3.09287	4.32225	6.83222	2.82331	4.61305	8.25891	3.47818	6.10241	7.8469	4.44943	7.78268	9.89603	4.07213	6.63757	9.94509	4.47168	6.37266	9.44596	3.7146	6.16361	8.64516	4.5085	6.68176	9.71041	2.45487	3.77317	5.90021	3.19728	5.54564	8.42509	6.34217	9.40338	13.5089	2.61328	4.74389	7.38588	6.34217
PE(16:0/18:3) µmol/L	0.023051	0.0390373	0.0697104	0.0260487	0.0387013	0.0697495	0.0374248	0.0724882	0.100408	0.0306221	0.0553378	0.136405	0.0237049	0.0450743	0.0768909	0.0265625	0.0414981	0.0833519	0.0379214	0.0587239	0.087684	0.0607382	0.078763	0.119197	0.0305822	0.090967	0.13968	0.045158	0.0747914	0.117784	0.036418	0.0658556	0.108393	0.0520711	0.0747914	0.117784	0.0211191	0.025752	0.0813978	0.034409	0.0533046	0.0818066	0.0650296	0.13274	0.158646	0.0220798	0.0506582	0.0769644	0.0650296
PE(16:0/20:2) µmol/L	0.0317993	0.043761	0.066234	0.0251255	0.0433122	0.0766503	0.0447586	0.061057	0.0749634	0.0363583	0.0469657	0.114235	0.033171	0.0474692	0.0705803	0.0278598	0.0438347	0.0812829	0.0334216	0.051016	0.0825947	0.0231659	0.0426648	0.0857067	0.0434755	0.075382	0.112279	0.0414521	0.0555857	0.0682721	0.0353774	0.0554445	0.0909558	0.0358234	0.0490643	0.0682721	0.0316278	0.0437404	0.0554834	0.0378406	0.0549965	0.148916	0.033992	0.0877643	0.122549	0.034281	0.0539205	0.0605051	0.033992
PE(16:0/20:3) µmol/L	0.119848	0.179377	0.281681	0.118745	0.192704	0.309493	0.165977	0.273016	0.387473	0.142956	0.237553	0.592841	0.137517	0.187272	0.327894	0.127655	0.196504	0.37317	0.159078	0.257325	0.408122	0.173382	0.278903	0.404066	0.154071	0.303672	0.527158	0.197386	0.279965	0.461335	0.15901	0.259554	0.449734	0.197386	0.279965	0.421935	0.0771594	0.146096	0.191621	0.150087	0.274513	0.487357	0.210728	0.358261	0.682152	0.0855816	0.182036	0.354748	0.210728
PE(16:0/20:4) µmol/L	1.22829	1.82798	2.74962	1.09698	1.6386	2.79597	1.69188	3.31483	3.77182	1.41225	2.24149	4.94054	1.29376	2.00515	3.20211	1.18403	1.88175	3.28597	1.63305	2.5087	4.0073	2.71038	3.93288	4.32771	1.99261	3.54155	6.41874	2.05575	3.16215	4.59919	1.69673	2.57748	4.19185	2.36369	3.29354	4.43675	1.1418	1.42989	2.7972	1.14107	2.24873	3.99121	2.16166	3.71407	5.35325	1.14219	1.44875	2.94487	2.16166
PE(16:0/20:5) µmol/L	0.00726489	0.0201508	0.0688982	0.00491715	0.00970678	0.0167509	0.0129715	0.047516	0.106093	0.00829989	0.0155978	0.0444286	0.0079244	0.0297371	0.0765702	0.00589814	0.0103374	0.0247133	0.0141503	0.0364052	0.0933923	0.0502753	0.0862274	0.112821	0.0143123	0.0778327	0.166783	0.0191399	0.0367379	0.0932658	0.0143797	0.0425307	0.099807	0.0248426	0.0512687	0.102326	0.00530394	0.0126411	0.043447	0.00414711	0.00859151	0.0320566	0.0281916	0.0430642	0.0758799	0.0045218	0.00926252	0.0378589	0.0281916
PE(16:0/22:4) µmol/L	0.102343	0.165211	0.238538	0.152252	0.217394	0.311205	0.122653	0.178333	0.304942	0.117539	0.260673	0.380153	0.107266	0.172653	0.248082	0.148557	0.219452	0.334101	0.0934428	0.158726	0.261983	0.0994278	0.125798	0.185746	0.103598	0.212843	0.436366	0.0843368	0.199733	0.353231	0.0954239	0.16993	0.2832	0.0951967	0.172321	0.296708	0.0635253	0.164986	0.236351	0.218489	0.273187	0.431956	0.122821	0.229709	0.350756	0.145802	0.216434	0.362355	0.122821
PE(16:0/22:5) µmol/L	0.486489	0.733532	1.08006	0.437688	0.669986	0.986673	0.672527	1.02113	1.65895	0.558747	0.866765	1.65969	0.547187	0.769081	1.18178	0.467385	0.726075	1.12422	0.62304	0.976483	1.54573	1.03867	1.41199	1.56041	0.717791	1.69268	2.90432	0.881539	1.0271	1.66799	0.639189	1.05192	1.7182	0.92747	1.31283	1.60048	0.378958	0.461399	1.06093	0.376111	0.736135	1.30441	0.717638	1.55051	2.47441	0.389184	0.521525	1.1801	0.717638
PE(16:0/22:6) µmol/L	0.207443	0.37093	0.845585	0.191089	0.294962	0.534045	0.435066	0.724764	1.21595	0.137388	0.331246	1.00982	0.225726	0.48515	0.910125	0.175389	0.294962	0.718177	0.406615	0.723902	1.14805	0.607302	0.912094	1.42303	0.479267	0.902331	2.07788	0.401269	0.588792	1.37059	0.419549	0.751584	1.24459	0.446206	0.654554	1.37059	0.218479	0.359802	0.696952	0.174354	0.407531	0.938684	0.459237	0.877834	1.52099	0.229323	0.383667	0.668219	0.459237
PE(18:0/18:0) µmol/L	0.635487	0.931523	1.25918	0.612895	0.834155	1.17376	0.875925	1.24843	1.64865	0.582781	0.937007	1.42066	0.677507	0.967933	1.36314	0.60492	0.849041	1.18517	0.650369	1.01128	1.50536	1.0056	1.23091	2.52351	0.846727	1.33823	1.56745	0.685923	1.15382	2.07864	0.725722	1.04868	1.52305	0.747342	1.15382	2.07864	0.503617	0.765277	0.952449	0.390995	0.505489	1.01621	0.703457	1.09102	2.54178	0.497936	0.506597	0.948648	0.703457
PE(18:0/18:1) µmol/L	13.1652	18.042	23.5729	12.0172	15.9514	23.3591	17.7203	23.3763	31.7398	12.4223	19.5042	28.4957	14.5277	18.9695	25.5589	12.268	16.7508	24.2135	14.0265	18.95	29.5477	19.2849	25.4754	50.2731	17.9072	24.2744	31.2038	15.8604	21.4214	40.033	14.8801	20.1117	30.39	16.235	24.0015	40.033	11.6893	13.0033	18.3441	9.61748	10.4347	20.7831	14.2495	21.3777	51.1405	10.7005	11.7985	18.2307	14.2495
PE(18:0/18:2) µmol/L	55.8811	70.6485	87.1256	58.325	72.8751	90.1598	65.1668	82.9978	101.872	60.0967	70.3638	100.994	56.0311	73.1981	89.5252	58.6463	71.9821	92.8929	58.9023	73.9717	89.8078	67.5704	94.6982	115.754	63.4204	75.4618	89.0622	64.6182	81.5526	93.6978	61.1129	74.5297	89.4431	64.6182	86.6381	99.2415	57.6408	73.7379	79.8819	54.1759	59.6939	66.9261	62.5879	82.1615	118.684	55.8684	66.7645	74.1202	62.5879
PE(18:0/18:3) µmol/L	0.249913	0.345494	0.47131	0.233418	0.309785	0.453358	0.309947	0.439404	0.571862	0.305113	0.375942	0.571078	0.257695	0.351982	0.533149	0.24962	0.348566	0.538829	0.297856	0.3912	0.549851	0.342165	0.397546	0.718656	0.264437	0.472437	0.705232	0.32654	0.529602	0.6956	0.291612	0.409539	0.593146	0.343493	0.522555	0.6956	0.202614	0.278123	0.490743	0.18909	0.224151	0.33953	0.393618	0.513276	0.859219	0.198018	0.255692	0.409064	0.393618
PE(18:0/20:1) µmol/L	0.201515	0.265075	0.384584	0.160957	0.197634	0.284504	0.248765	0.315534	0.414647	0.18789	0.264462	0.382475	0.204016	0.27825	0.389305	0.169044	0.21903	0.291334	0.217447	0.278753	0.413869	0.279375	0.381131	0.525356	0.269146	0.36619	0.478238	0.246375	0.350637	0.42622	0.224235	0.314256	0.448292	0.263463	0.364117	0.442143	0.156821	0.219733	0.263081	0.113725	0.169673	0.189639	0.234472	0.339968	0.488403	0.151775	0.186315	0.249066	0.234472
PE(18:0/20:2) µmol/L	0.918082	1.27239	1.59908	0.896289	1.10186	1.525	0.980926	1.27651	1.80866	0.906558	1.21772	1.83174	0.942469	1.27239	1.60286	0.900382	1.16737	1.63222	1.01379	1.26349	1.6555	0.879941	1.34768	2.12489	0.900233	1.63701	2.4744	1.17306	1.36131	1.65203	0.991062	1.29724	1.84752	1.14142	1.36131	1.75399	0.932666	1.03752	1.56413	0.615214	0.892161	1.70975	1.18671	1.44486	1.77666	0.782388	1.02998	1.57683	1.18671
PE(18:0/20:3) µmol/L	5.56762	7.83832	10.2476	5.56831	7.92682	9.76713	6.00153	9.01316	11.8312	6.38411	7.94748	10.1805	5.65583	7.87749	10.3784	5.94874	7.92682	9.88596	6.10204	8.20065	11.0316	5.34176	7.03412	12.7912	5.80026	9.98444	14.9806	6.93439	8.68217	11.1025	6.09128	8.47885	11.529	6.64768	8.63029	11.6248	4.51814	5.42578	7.44059	4.15219	8.32674	12.4662	6.284	8.05375	11.1116	4.36554	6.31209	9.69312	6.284
PE(18:0/20:4) µmol/L	3.05034	4.3064	5.96502	2.84069	4.25231	5.36852	3.83818	6.37179	8.35507	3.43523	4.62783	9.24017	3.1423	4.60004	6.72111	3.0386	4.44711	6.25557	3.89015	5.38636	8.23144	5.00132	6.19481	7.0634	4.27357	8.37982	11.6515	4.31839	7.05739	9.05104	3.9793	5.5234	8.86041	4.56953	6.28222	8.73082	2.3785	2.89452	7.44209	3.66016	5.3517	10.0553	4.49671	5.26122	12.5306	2.49398	4.16552	7.104	4.49671
PE(18:0/20:5) µmol/L	0.10608	0.265046	0.587276	0.0919741	0.131298	0.211991	0.192249	0.476318	0.818849	0.124131	0.177609	0.318818	0.114861	0.290596	0.65304	0.09536	0.147745	0.237189	0.149254	0.34068	0.742523	0.429736	0.568386	0.854835	0.254058	0.45992	1.17408	0.188872	0.447127	0.812435	0.168528	0.376081	0.983645	0.221405	0.511567	0.812435	0.0838749	0.263834	0.445975	0.0475278	0.0756	0.212356	0.137321	0.4228	0.463228	0.0621719	0.16485	0.284452	0.137321
PE(18:0/22:4) µmol/L	0.197479	0.282996	0.459639	0.262521	0.335314	0.539488	0.204674	0.282771	0.516999	0.235921	0.3881	0.587615	0.200114	0.282996	0.465572	0.255346	0.346319	0.553529	0.183569	0.254081	0.443954	0.235754	0.329498	0.515836	0.218575	0.33863	0.538696	0.171157	0.34479	0.484414	0.18485	0.267257	0.445423	0.218759	0.34479	0.484692	0.140194	0.162166	0.354148	0.254388	0.275257	0.430465	0.1972	0.289376	0.498754	0.147542	0.254388	0.338754	0.1972
PE(18:0/22:5) µmol/L	1.39549	1.83449	2.3023	1.25232	1.72783	2.10773	1.35504	1.79638	2.32677	1.44113	1.72215	2.31954	1.39549	1.81428	2.3087	1.33975	1.72783	2.14216	1.55577	1.89056	2.5562	1.80814	1.9911	2.80227	1.4049	2.39788	3.39902	1.51353	1.90535	2.55872	1.53355	1.97042	2.65993	1.54766	1.9311	2.61526	1.27265	1.55372	1.71819	1.20279	1.50875	1.99974	1.48063	1.83863	2.50452	1.23145	1.53123	1.71635	1.48063
PE(18:0/22:6) µmol/L	0.132808	0.251641	0.497966	0.122879	0.180045	0.362937	0.144201	0.30956	0.779358	0.127196	0.224521	0.912886	0.134265	0.252514	0.536894	0.125367	0.192411	0.425446	0.216798	0.376614	0.712076	0.220147	0.424514	0.997495	0.199927	0.510547	1.15795	0.17315	0.253307	0.81623	0.216056	0.459576	0.833772	0.17315	0.321743	0.935383	0.126707	0.229198	0.466274	0.0460527	0.463034	0.858279	0.132025	0.41619	1.09253	0.0782476	0.229591	0.493032	0.132025
PE(18:1/16:1) µmol/L	0.112355	0.1567	0.211463	0.0825719	0.129251	0.174439	0.117151	0.171928	0.227517	0.122211	0.172711	0.217716	0.113383	0.15703	0.216283	0.0884518	0.146765	0.199922	0.132814	0.174596	0.249635	0.147955	0.197334	0.285549	0.131208	0.186457	0.274729	0.121922	0.154027	0.237474	0.131666	0.175329	0.251428	0.127188	0.167095	0.240102	0.109895	0.155931	0.17327	0.0998757	0.125883	0.138886	0.126503	0.22914	0.288289	0.10752	0.129838	0.157042	0.126503
PE(18:1/18:1) µmol/L	2.09984	3.02345	5.20738	1.86861	2.30644	3.68818	2.53059	3.81291	5.24001	2.74133	3.64618	4.85587	2.11217	3.20086	5.20738	1.95535	3.00596	4.10489	2.23101	3.35789	5.59269	2.06162	4.6273	5.30972	2.71832	4.36009	6.63362	2.21742	3.82861	5.87242	2.31557	3.63643	5.65876	2.21742	4.18539	5.28381	1.98786	3.12824	3.53744	2.54088	3.29523	6.12913	2.80632	2.94451	4.8137	2.33979	3.16099	3.71124	2.80632
PE(18:1/18:2) µmol/L	2.09156	3.38004	4.87308	2.37676	3.17052	5.06738	2.23982	3.82476	6.01642	2.47828	5.21196	7.53	2.17645	3.39429	5.22533	2.42487	3.57504	6.14156	2.25474	3.52696	6.06534	2.00381	4.41593	7.51905	2.58322	4.00631	5.63078	2.61475	3.82573	5.99503	2.29063	3.54074	5.96534	2.61475	3.82573	6.31561	1.7778	3.82377	4.61262	2.70029	4.15872	9.22851	2.67554	4.88424	8.01805	2.45683	3.99124	5.59702	2.67554
PE(18:1/18:3) µmol/L	0.0261384	0.0417701	0.0800779	0.0265157	0.0345324	0.0659023	0.0347679	0.0701502	0.109475	0.0422814	0.0623003	0.117152	0.0269974	0.0466594	0.0858649	0.029189	0.0473923	0.0789145	0.0312993	0.0540256	0.0949865	0.0357117	0.0715424	0.0984517	0.0291096	0.0605548	0.158562	0.0331742	0.0586403	0.1112	0.0310032	0.0553224	0.107397	0.0331742	0.0610929	0.0950165	0.0134262	0.0428226	0.0466514	0.0435491	0.0562785	0.143523	0.0465975	0.0673859	0.154775	0.0259789	0.0465891	0.0695567	0.0465975
PE(18:1/20:1) µmol/L	0.0287714	0.0438794	0.0647456	0.0245597	0.034933	0.0497999	0.0388406	0.0522309	0.0849337	0.0306503	0.0424945	0.0762528	0.0304619	0.0456644	0.0675794	0.0259487	0.0379424	0.0625041	0.0318287	0.0501371	0.0862977	0.0285344	0.0492083	0.0697072	0.0355751	0.0664775	0.108053	0.0327724	0.0504386	0.0828173	0.0333625	0.0513626	0.0923322	0.0324559	0.0504386	0.0751329	0.0298715	0.0400928	0.0576415	0.0343431	0.0425491	0.0864888	0.0365269	0.0475103	0.0780343	0.0326408	0.0413209	0.066274	0.0365269
PE(18:1/20:2) µmol/L	0.0304496	0.0441632	0.0739874	0.0292449	0.0451243	0.0910065	0.038658	0.0569334	0.0805818	0.0375738	0.0655845	0.11496	0.0317256	0.0472373	0.074963	0.0338892	0.0489524	0.100072	0.0342776	0.0534202	0.0771079	0.0216147	0.0374725	0.0785658	0.0364556	0.0740112	0.0956301	0.0353702	0.0619071	0.0879025	0.034437	0.0543123	0.0859207	0.0325352	0.0577264	0.0831562	0.0162795	0.0592764	0.0712	0.0419464	0.0558989	0.146186	0.0486215	0.0675824	0.096893	0.0235209	0.0575877	0.0749962	0.0486215
PE(18:1/20:3) µmol/L	0.15463	0.229259	0.34876	0.213501	0.306508	0.414909	0.190577	0.252864	0.41206	0.233731	0.344489	0.491218	0.157324	0.232972	0.352705	0.21532	0.321386	0.435579	0.155762	0.248672	0.406713	0.141729	0.187285	0.33346	0.153888	0.316982	0.445017	0.151282	0.24757	0.421144	0.155369	0.270509	0.412466	0.151282	0.218265	0.392278	0.120553	0.195349	0.402442	0.284502	0.477344	1.08805	0.163156	0.328364	0.380905	0.172453	0.340046	0.483748	0.163156
PE(18:1/20:4) µmol/L	1.70374	2.42248	3.44903	2.00059	2.80351	4.30352	2.11447	3.01569	3.87945	2.33878	3.40282	6.31914	1.74686	2.47416	3.51041	2.0369	3.10582	4.63407	2.03614	2.83192	4.027	1.89638	2.59978	3.64203	2.09668	3.24317	5.7374	1.91453	3.0047	4.82928	2.05235	2.90475	4.1862	1.94781	3.0047	4.18216	2.20326	2.39559	3.00487	2.91387	3.08328	8.38669	1.96466	3.63914	5.90479	2.27182	2.92569	3.79824	1.96466
PE(18:1/22:4) µmol/L	0.0244471	0.0442079	0.076684	0.0390946	0.060635	0.0923082	0.0260512	0.0501243	0.084849	0.0371442	0.0800868	0.150903	0.0248711	0.0464905	0.076684	0.0383876	0.0652628	0.103717	0.0261901	0.0431019	0.0677032	0.0278198	0.0359997	0.049389	0.0247596	0.0442759	0.108208	0.0204389	0.0354117	0.0797286	0.0259602	0.0432389	0.0718144	0.0230103	0.0354117	0.0728533	0.0239068	0.0506762	0.0840578	0.0582476	0.0734386	0.106895	0.0175699	0.0485653	0.0754377	0.0481037	0.0618151	0.095837	0.0175699
PE(18:1/22:5) µmol/L	0.0567057	0.0948554	0.131015	0.0649914	0.0895334	0.124046	0.0662916	0.095931	0.169908	0.0676173	0.136431	0.211601	0.0598309	0.0948554	0.134534	0.0675515	0.0970925	0.155963	0.0625629	0.0925346	0.143063	0.0733933	0.107076	0.150766	0.0674187	0.131057	0.213995	0.0582296	0.12019	0.16253	0.0664111	0.0965769	0.163481	0.0585078	0.110323	0.157846	0.0496972	0.069075	0.0939953	0.0612668	0.102284	0.257716	0.0615334	0.137034	0.185899	0.0556203	0.0756358	0.154554	0.0615334
PE(18:1/22:6) µmol/L	0.0965078	0.146513	0.240314	0.0930435	0.143022	0.214093	0.157535	0.211072	0.359725	0.0791996	0.14885	0.40073	0.105814	0.15741	0.268106	0.092369	0.147773	0.270415	0.148649	0.225921	0.296437	0.168477	0.249565	0.389689	0.119569	0.265859	0.560195	0.138772	0.178151	0.37789	0.139021	0.232357	0.334904	0.142159	0.19656	0.37789	0.0922035	0.125534	0.210763	0.0849999	0.176828	0.511474	0.162566	0.273869	0.350345	0.0946829	0.127301	0.226177	0.162566
PE(18:2/16:1) µmol/L	0.459292	0.60498	0.869887	0.348871	0.539425	0.73351	0.424002	0.639775	1.01515	0.462138	0.786087	1.07594	0.456784	0.605815	0.888403	0.362628	0.607714	0.951224	0.484684	0.724325	0.984802	0.532131	0.736344	1.02849	0.436655	0.632161	1.20394	0.419498	0.575328	0.895721	0.467359	0.693359	0.996264	0.459783	0.626592	0.915089	0.396387	0.736057	0.990168	0.406541	0.474386	0.496873	0.565375	0.951276	1.47959	0.405512	0.496873	0.842897	0.565375
PE(18:2/18:2) µmol/L	0.150475	0.232174	0.408443	0.141561	0.195034	0.287916	0.130163	0.233699	0.394228	0.162945	0.349119	0.540595	0.149395	0.232174	0.404545	0.142401	0.211022	0.401718	0.176961	0.258164	0.385186	0.203593	0.366473	0.505441	0.145214	0.265842	0.392686	0.183998	0.286409	0.373214	0.157758	0.259809	0.39156	0.184116	0.286409	0.412752	0.0883875	0.260463	0.269818	0.155802	0.232023	0.5287	0.247062	0.455702	0.64922	0.117572	0.246243	0.281054	0.247062
PE(18:2/20:1) µmol/L	0.0344211	0.0564555	0.0799934	0.0302059	0.0450668	0.0656537	0.0407704	0.0639791	0.0970909	0.037751	0.0692031	0.1088	0.0365797	0.0575463	0.0818383	0.0343617	0.0525035	0.0924919	0.0392594	0.057279	0.089605	0.0348283	0.0597104	0.088626	0.0380841	0.0786001	0.132779	0.0476688	0.0660127	0.0907397	0.038932	0.06186	0.0964931	0.042252	0.0660127	0.0900521	0.0276939	0.0590134	0.0969727	0.0334469	0.0425091	0.168727	0.0487746	0.0816448	0.108083	0.0312586	0.0563052	0.119147	0.0487746
PE(18:2/20:4) µmol/L	0.0381802	0.0607249	0.0885773	0.0390408	0.061768	0.0844598	0.0469734	0.0665474	0.0963162	0.043534	0.0913104	0.124578	0.0393931	0.062379	0.0892299	0.0406872	0.0662162	0.108017	0.0504937	0.0689817	0.101505	0.0675259	0.0836245	0.100859	0.0464427	0.0848485	0.113241	0.0586531	0.0819702	0.112406	0.0503916	0.0709816	0.101628	0.0609753	0.0820188	0.105645	0.032031	0.0532255	0.0818194	0.0422367	0.0439098	0.140447	0.0496823	0.0967873	0.164404	0.0411354	0.0485677	0.0788588	0.0496823
PE(O-16:0/18:1) µmol/L	0.103807	0.18146	0.259577	0.101056	0.128085	0.257511	0.116835	0.171208	0.317382	0.102903	0.191656	0.2797	0.110262	0.180845	0.263905	0.102019	0.146168	0.264404	0.13819	0.193734	0.312586	0.13089	0.179154	0.324651	0.115639	0.193717	0.358014	0.114449	0.188266	0.267425	0.132638	0.193717	0.318296	0.126942	0.188266	0.267425	0.102227	0.192002	0.299533	0.116428	0.136688	0.175543	0.118723	0.208888	0.252652	0.109929	0.147919	0.258303	0.118723
PE(O-16:0/18:2) µmol/L	0.262515	0.380074	0.47065	0.250205	0.338834	0.438565	0.274579	0.370203	0.553494	0.252746	0.370472	0.488274	0.263001	0.377909	0.50507	0.256646	0.344759	0.464417	0.30041	0.412554	0.592482	0.258371	0.390743	0.5522	0.256931	0.35145	0.491922	0.256453	0.348336	0.480798	0.2914	0.405266	0.558023	0.256453	0.359386	0.493639	0.24936	0.448311	0.583314	0.20292	0.329875	0.351419	0.308177	0.389235	0.571831	0.248248	0.336872	0.468603	0.308177
PE(O-16:0/18:3) µmol/L	0.0103711	0.0202476	0.0327668	0.0115611	0.0176778	0.0307987	0.0147018	0.0237152	0.0393661	0.0137513	0.0186426	0.0358908	0.0112162	0.0206425	0.0333112	0.0125917	0.0178088	0.0314798	0.0140175	0.0236791	0.0395586	0.0151451	0.0293976	0.0381439	0.0144302	0.0236525	0.0393722	0.0116984	0.0174041	0.0336217	0.0143575	0.0236525	0.0394523	0.0134747	0.0195611	0.0340322	0.00723688	0.0119794	0.0146853	0.00820097	0.00842561	0.0119981	0.0137762	0.0213131	0.0464704	0.00814523	0.011582	0.0139986	0.0137762
PE(O-16:0/20:3) µmol/L	0.0776493	0.116098	0.181173	0.0658812	0.104403	0.147089	0.092009	0.134772	0.229689	0.0651408	0.122996	0.164996	0.0825195	0.118647	0.185269	0.0656973	0.106716	0.148815	0.089904	0.139582	0.214717	0.10008	0.140082	0.204995	0.090843	0.152356	0.210871	0.0782334	0.137609	0.209811	0.0905628	0.143606	0.212583	0.0896818	0.137609	0.209811	0.0458572	0.110475	0.197898	0.0585599	0.0792536	0.106627	0.0758373	0.109392	0.161073	0.0537918	0.0858255	0.13575	0.0758373
PE(O-16:0/20:4) µmol/L	0.311601	0.487558	0.704975	0.268661	0.427107	0.591372	0.318636	0.482546	0.915592	0.284661	0.43589	0.573334	0.311601	0.487558	0.712327	0.279026	0.434651	0.589437	0.358189	0.553826	0.806311	0.369847	0.483462	0.841093	0.361259	0.573122	0.713215	0.357642	0.445207	0.807309	0.360119	0.555466	0.757298	0.362927	0.445207	0.807309	0.201044	0.571716	0.688298	0.26165	0.351718	0.392976	0.283431	0.394682	0.453127	0.235926	0.381096	0.600802	0.283431
PE(O-16:0/20:5) µmol/L	0.0167814	0.0359834	0.0986456	0.0112413	0.0210303	0.0337347	0.038944	0.0769505	0.151773	0.0128767	0.0306772	0.0507343	0.0178944	0.0433085	0.111282	0.0119662	0.0245058	0.040611	0.0238527	0.0751621	0.171941	0.046561	0.113425	0.272804	0.0377886	0.0841862	0.175361	0.0443113	0.0662408	0.0923051	0.0246386	0.0788207	0.172526	0.0448322	0.0669438	0.127549	0.0143018	0.0572374	0.0769639	0.00739639	0.00830159	0.0288139	0.0221798	0.0283592	0.147584	0.00826665	0.0162394	0.060503	0.0221798
PE(O-16:0/22:4) µmol/L	0.0803579	0.142135	0.227124	0.112412	0.164692	0.224886	0.0845859	0.127811	0.218891	0.116811	0.167985	0.263957	0.0808044	0.138013	0.222571	0.116316	0.166021	0.247373	0.0981751	0.156392	0.255634	0.0746059	0.119069	0.233876	0.0940685	0.168553	0.276024	0.0879798	0.142518	0.269287	0.0976572	0.162197	0.257841	0.0813846	0.142518	0.245121	0.0844329	0.10735	0.321524	0.123023	0.156746	0.197951	0.0857634	0.131313	0.191229	0.0918285	0.150349	0.198873	0.0857634
PE(O-16:0/22:5) µmol/L	0.247491	0.335229	0.433404	0.20896	0.275395	0.385233	0.224281	0.35704	0.525614	0.234595	0.328605	0.423754	0.247491	0.338818	0.440404	0.223217	0.30141	0.392945	0.265416	0.371304	0.511982	0.31944	0.429962	0.534662	0.262918	0.416793	0.505786	0.267628	0.341716	0.462426	0.264683	0.378769	0.508819	0.293761	0.365636	0.488596	0.203628	0.241992	0.451346	0.190113	0.234363	0.241434	0.213039	0.287009	0.523932	0.2097	0.235578	0.245446	0.213039
PE(O-16:0/22:6) µmol/L	0.0626909	0.0982881	0.170799	0.0541105	0.0787845	0.121595	0.0861584	0.120739	0.191192	0.0587467	0.0839505	0.143195	0.0658502	0.10233	0.175524	0.0542418	0.080555	0.134389	0.0827708	0.131314	0.230878	0.084102	0.138489	0.302493	0.0905797	0.128024	0.24408	0.0858642	0.127911	0.16558	0.0853939	0.13129	0.235422	0.0858642	0.130672	0.176817	0.0430502	0.131501	0.224495	0.0319197	0.0566713	0.0782965	0.0798555	0.106918	0.208579	0.0386966	0.0782965	0.200198	0.0798555
PE(O-18:0/16:0) µmol/L	0.535981	0.622933	0.757516	0.513921	0.611057	0.685618	0.514398	0.643972	0.772541	0.505895	0.618719	0.673794	0.535186	0.626868	0.757516	0.513918	0.615055	0.683033	0.563032	0.655281	0.763472	0.623322	0.74665	0.833223	0.548108	0.618645	0.701458	0.532469	0.674865	0.770439	0.562024	0.650225	0.75246	0.581444	0.68162	0.795314	0.599274	0.672371	0.765802	0.37788	0.534075	0.673162	0.498885	0.60906	0.739199	0.452782	0.608703	0.728207	0.498885
PE(O-18:0/16:1) µmol/L	0.0445273	0.0585248	0.0715434	0.0461415	0.0562543	0.070167	0.0492836	0.0720448	0.0822981	0.0433876	0.0550388	0.0709114	0.0445603	0.0611687	0.076616	0.045176	0.056193	0.0703011	0.0557558	0.0664359	0.083274	0.0613198	0.0882312	0.0998584	0.0462277	0.0603747	0.0836606	0.0482638	0.0681013	0.0896899	0.0543499	0.0662247	0.0833125	0.0513973	0.0682647	0.0927922	0.0451128	0.0703186	0.0752151	0.0303707	0.0539232	0.0640412	0.0395348	0.0584664	0.0715002	0.0362706	0.0617662	0.0731741	0.0395348
PE(O-18:0/18:1) µmol/L	0.501963	0.625079	0.7729	0.475016	0.581266	0.724288	0.576317	0.687768	0.79841	0.501604	0.593546	0.773214	0.518783	0.629938	0.778519	0.490786	0.581266	0.742134	0.573932	0.724288	0.8609	0.652363	0.915018	1.02414	0.525738	0.68143	0.7707	0.552234	0.690656	1.00397	0.567731	0.70257	0.845769	0.590582	0.707307	1.00397	0.465991	0.764144	0.848232	0.360577	0.502259	0.605511	0.487741	0.645068	0.897024	0.430556	0.572284	0.769817	0.487741
PE(O-18:0/18:2) µmol/L	0.477526	0.605274	0.716773	0.461271	0.582307	0.798217	0.505584	0.688479	0.839326	0.484963	0.704	1.10509	0.482272	0.613194	0.722984	0.470853	0.640678	0.820297	0.493723	0.613126	0.825606	0.521167	0.68526	0.892234	0.509108	0.61015	0.848224	0.471197	0.617738	0.742816	0.501888	0.61073	0.826226	0.507682	0.647382	0.755523	0.53143	0.649202	0.746915	0.523654	0.605519	0.904844	0.640919	0.980337	1.1262	0.543252	0.627361	0.832431	0.640919
PE(O-18:0/20:1) µmol/L	0.0245796	0.0351033	0.0444387	0.0238342	0.0313859	0.0397858	0.0255251	0.0380729	0.0416633	0.0207898	0.0384286	0.0472887	0.0251222	0.0352508	0.0432158	0.0234241	0.0328105	0.0422091	0.0247163	0.0382881	0.0478776	0.0424828	0.0451685	0.0620736	0.0241072	0.036473	0.058553	0.0351903	0.0421628	0.0490978	0.024665	0.037235	0.0480857	0.0359566	0.0437612	0.050863	0.0191145	0.0259742	0.0573853	0.0150417	0.0313363	0.0384237	0.0368779	0.0477787	0.0538507	0.0182734	0.0286553	0.0412019	0.0368779
PE(O-18:0/20:2) µmol/L	0.0204261	0.0278082	0.0408473	0.0172191	0.0267605	0.0391317	0.0209906	0.0269505	0.0470005	0.0235348	0.0351428	0.0424699	0.0206677	0.0274793	0.0413671	0.0179185	0.0287937	0.0405585	0.0205742	0.0296885	0.0447053	0.023499	0.0327448	0.0493903	0.0213179	0.0315192	0.043895	0.0236446	0.0290588	0.0366974	0.0209011	0.0306432	0.0442888	0.0236446	0.0303911	0.0412855	0.0170211	0.0263159	0.0483562	0.00987507	0.025778	0.0284655	0.0190666	0.0332619	0.0523432	0.016771	0.0260469	0.0326648	0.0190666
PE(O-18:0/20:3) µmol/L	0.188846	0.254061	0.341223	0.173638	0.224345	0.313497	0.199224	0.249827	0.416225	0.172761	0.245774	0.355658	0.191117	0.252201	0.344891	0.172939	0.230087	0.331766	0.21509	0.26747	0.375126	0.211977	0.281445	0.429077	0.20553	0.272626	0.38472	0.21487	0.27443	0.347498	0.209649	0.271163	0.375241	0.21487	0.27443	0.347758	0.166742	0.227227	0.377883	0.167677	0.256913	0.273428	0.178091	0.288274	0.363462	0.174563	0.229693	0.281432	0.178091
PE(O-18:0/20:4) µmol/L	0.394428	0.494075	0.656074	0.411478	0.495811	0.659486	0.508729	0.598047	0.736115	0.395673	0.546968	0.669922	0.412115	0.529827	0.692155	0.40112	0.521132	0.657111	0.459038	0.539734	0.71314	0.503942	0.6141	0.755065	0.462298	0.606237	0.707597	0.44408	0.504378	0.616085	0.460421	0.544027	0.708756	0.452215	0.505821	0.648001	0.286455	0.475344	0.563054	0.384877	0.460423	0.591185	0.354561	0.6219	0.696934	0.379565	0.467883	0.542643	0.354561
PE(O-18:0/20:5) µmol/L	0.0669016	0.111239	0.152224	0.0628071	0.091488	0.135381	0.0718698	0.0974778	0.184532	0.0690294	0.0949517	0.15234	0.068804	0.10871	0.155545	0.0648	0.0920277	0.141121	0.0804197	0.116743	0.190529	0.0825993	0.117465	0.180574	0.0960228	0.132344	0.205207	0.0653564	0.111391	0.14683	0.0837207	0.122237	0.190879	0.0743258	0.111391	0.148112	0.0721594	0.0963707	0.170585	0.0676899	0.084257	0.12772	0.0737907	0.108062	0.122553	0.0731706	0.093053	0.164212	0.0737907
PE(O-18:0/22:4) µmol/L	0.123947	0.162204	0.195335	0.164313	0.198252	0.239495	0.129503	0.155622	0.216635	0.138321	0.189968	0.22142	0.124676	0.161321	0.195335	0.157737	0.192784	0.230954	0.127074	0.165836	0.204284	0.154838	0.184579	0.255765	0.112542	0.153052	0.222904	0.123838	0.176907	0.213283	0.125184	0.165326	0.2121	0.131817	0.176907	0.213283	0.126888	0.18525	0.226424	0.160001	0.200171	0.237405	0.118009	0.179909	0.202152	0.134905	0.189738	0.221363	0.118009
PE(O-18:0/22:5) µmol/L	0.136409	0.176503	0.235733	0.122889	0.166389	0.247239	0.135015	0.179258	0.246517	0.144495	0.188467	0.244218	0.136409	0.176503	0.243235	0.132471	0.17257	0.246988	0.160611	0.196963	0.259558	0.182802	0.221807	0.288749	0.143998	0.194235	0.344833	0.158818	0.197064	0.229849	0.158355	0.196334	0.270769	0.168346	0.203032	0.252985	0.122316	0.17493	0.228204	0.109579	0.139256	0.176263	0.122593	0.223031	0.289648	0.124108	0.150448	0.18805	0.122593
PE(O-18:0/22:6) µmol/L	0.0670355	0.0986377	0.1436	0.0543297	0.0780762	0.123681	0.0752507	0.110138	0.152836	0.0510128	0.0946031	0.127488	0.0701395	0.102743	0.148608	0.0538561	0.0799391	0.126199	0.0833915	0.122991	0.202153	0.100366	0.12335	0.231276	0.0748613	0.126282	0.205667	0.0721669	0.113267	0.162925	0.0819524	0.12324	0.202711	0.0748673	0.113267	0.162925	0.0673081	0.147107	0.216061	0.0444127	0.084245	0.0930825	0.0750786	0.113333	0.186724	0.0582253	0.0930825	0.172247	0.0750786
PE(P-14:0/18:1) µmol/L	0.0181061	0.025774	0.0474786	0.0145499	0.0229476	0.0379855	0.021609	0.0336222	0.0433727	0.0170452	0.0318967	0.0535421	0.0189553	0.0280848	0.0461058	0.0149211	0.0271482	0.0409697	0.0209493	0.0341593	0.0535725	0.035639	0.049852	0.077036	0.0163317	0.0333011	0.0658133	0.0278484	0.0357245	0.0476469	0.0187267	0.0338561	0.0551451	0.0281239	0.0421439	0.0513084	0.0154944	0.025148	0.0556254	0.0112493	0.0168471	0.0335892	0.0397804	0.0481566	0.0792318	0.01321	0.0188634	0.0523256	0.0397804
PE(P-16:0/16:0) µmol/L	0.275322	0.371444	0.452423	0.246762	0.295318	0.403198	0.339282	0.388897	0.514652	0.301169	0.384422	0.562953	0.279992	0.373927	0.454218	0.259992	0.313977	0.461135	0.329002	0.393464	0.511217	0.30211	0.429288	0.593515	0.314684	0.451553	0.627562	0.322455	0.410172	0.500475	0.324595	0.394572	0.53568	0.310444	0.410172	0.502686	0.258688	0.300046	0.454866	0.206868	0.248459	0.341736	0.317747	0.418876	0.534074	0.240058	0.290793	0.40637	0.317747
PE(P-16:0/16:1) µmol/L	0.0341018	0.0508044	0.0752975	0.0332704	0.0440649	0.0625375	0.0412202	0.0528267	0.0873915	0.0388922	0.0591167	0.091118	0.0366354	0.051295	0.0754608	0.0349975	0.0490643	0.0735803	0.0405367	0.0668159	0.097407	0.054788	0.0617408	0.119316	0.0460493	0.0712412	0.153665	0.0349829	0.0643438	0.0882274	0.0408759	0.0710051	0.109424	0.0518781	0.0629274	0.0882274	0.0330654	0.0565156	0.0850968	0.0250419	0.0336595	0.0550853	0.0499707	0.0631401	0.0948803	0.0274114	0.0431483	0.0608614	0.0499707
PE(P-16:0/18:0) µmol/L	0.0818627	0.102354	0.13182	0.0739497	0.0974436	0.127961	0.0810201	0.108386	0.15145	0.0915206	0.114611	0.161231	0.081604	0.10711	0.1335	0.0788149	0.106449	0.134541	0.0848732	0.112491	0.148035	0.0952035	0.116909	0.172143	0.0866663	0.115706	0.195765	0.0902277	0.109428	0.157706	0.0860986	0.112811	0.155126	0.0940432	0.109428	0.157706	0.0733736	0.101061	0.123983	0.065943	0.0763737	0.0804273	0.0881529	0.112074	0.127573	0.0707334	0.07876	0.105321	0.0881529
PE(P-16:0/18:1) µmol/L	1.51978	2.43751	3.57524	1.28776	1.73021	2.9844	1.85127	2.5193	3.70979	1.60333	2.47819	4.51455	1.59801	2.45518	3.57524	1.35504	2.01022	3.62908	1.69864	2.73878	4.54	2.04528	2.75932	4.43821	1.78646	3.11238	6.17452	2.09641	3.2509	3.58877	1.71243	2.7919	4.74313	2.06129	2.89822	3.58877	1.52304	2.4217	3.60272	1.2729	1.70376	2.86635	2.10387	3.17285	4.16971	1.38863	1.89625	3.43746	2.10387
PE(P-16:0/18:2) µmol/L	2.86281	4.29045	5.62775	2.61945	3.52569	5.05583	3.14642	4.04194	5.77625	2.78869	4.28417	6.93015	2.87998	4.20566	5.62775	2.68072	3.70081	5.20407	3.07702	4.59121	6.36516	2.8361	3.89744	6.37523	3.31805	4.12122	6.40954	2.94088	4.40992	5.05797	3.19886	4.512	6.36765	2.94088	4.31736	5.05797	3.96968	5.44283	6.73833	2.68694	4.10465	4.65968	3.93175	5.11266	7.02858	3.52431	4.10845	5.88591	3.93175
PE(P-16:0/18:3) µmol/L	0.0494045	0.0764314	0.114478	0.0379856	0.0602531	0.0917596	0.0780535	0.0876809	0.136838	0.0478836	0.0908911	0.146452	0.0515458	0.0797641	0.118546	0.0422874	0.0727709	0.107926	0.0591083	0.0931312	0.142776	0.0681115	0.107591	0.173314	0.0672978	0.117314	0.177747	0.0802495	0.0951692	0.129536	0.0602038	0.0965231	0.14344	0.0802495	0.0992891	0.129536	0.0377908	0.0485956	0.100136	0.0393022	0.0396195	0.0560219	0.0710103	0.142442	0.188589	0.0391593	0.0483145	0.0654475	0.0710103
PE(P-16:0/20:1) µmol/L	0.0625533	0.0946584	0.125382	0.050278	0.068644	0.110409	0.0653104	0.100919	0.149654	0.063678	0.105876	0.14082	0.0629674	0.0949297	0.13279	0.0553184	0.0757982	0.12129	0.0668972	0.101561	0.159638	0.0805731	0.105627	0.197371	0.0657867	0.123751	0.228486	0.0787115	0.102963	0.145072	0.0667487	0.105098	0.162639	0.0802793	0.102963	0.145072	0.0493742	0.0869819	0.139351	0.05336	0.0789298	0.10813	0.0999587	0.124486	0.170185	0.0534709	0.0829559	0.110146	0.0999587
PE(P-16:0/20:2) µmol/L	0.043875	0.0639317	0.0851496	0.0398627	0.0542817	0.0752698	0.0455574	0.0584791	0.117439	0.047746	0.0686176	0.102318	0.0449587	0.0619848	0.0865831	0.0421608	0.0574298	0.0814355	0.0450572	0.0712305	0.0928581	0.0462525	0.0572069	0.115364	0.0483934	0.0644261	0.12653	0.0529698	0.0609778	0.0868337	0.047258	0.0705919	0.0982462	0.0513718	0.0609778	0.0868337	0.0308797	0.072583	0.0932597	0.0320629	0.0444717	0.0957842	0.0583082	0.0811035	0.121352	0.0315481	0.0674496	0.0886	0.0583082
PE(P-16:0/20:3) µmol/L	0.626442	0.93458	1.26373	0.461295	0.729072	1.13558	0.675163	0.985675	1.64666	0.553901	1.06343	1.4677	0.648581	0.940627	1.36364	0.485608	0.739305	1.20633	0.717292	1.03295	1.50425	0.811599	1.08728	1.68866	0.645131	1.07802	1.77088	0.771481	1.04493	1.32642	0.694201	1.03362	1.66604	0.78189	1.04493	1.43293	0.505889	0.581248	1.27136	0.414351	0.63071	0.89943	0.677985	1.38709	1.78255	0.45219	0.605979	0.90019	0.677985
PE(P-16:0/20:4) µmol/L	1.92412	3.01041	4.85639	1.7782	2.44056	3.86508	2.16613	3.21104	5.51149	2.08152	3.14806	3.98328	1.92651	3.03995	4.85639	1.83737	2.64065	3.86643	2.32584	3.37407	5.6772	2.05442	3.07165	5.39674	2.51275	3.4303	5.27255	2.18086	2.72262	3.92971	2.35832	3.38147	5.67601	2.18086	2.75415	3.92971	1.43442	3.39263	4.86602	1.65309	2.03648	4.46794	2.37304	2.97719	3.63415	1.54431	2.60314	4.61825	2.37304
PE(P-16:0/20:5) µmol/L	0.0738717	0.15243	0.446316	0.0457138	0.0755049	0.123271	0.15861	0.334321	0.674705	0.0675078	0.114552	0.245817	0.0777902	0.218803	0.491243	0.0507372	0.0963525	0.156142	0.0991046	0.285064	0.662951	0.22631	0.507808	1.08519	0.15076	0.383974	1.09694	0.112961	0.210207	0.597131	0.104782	0.335744	0.764805	0.130703	0.270033	0.707525	0.0326154	0.221005	0.319114	0.0352879	0.0462048	0.117577	0.120238	0.215859	0.609922	0.0327771	0.0664709	0.260545	0.120238
PE(P-16:0/22:4) µmol/L	1.00713	1.60394	2.50477	1.17558	1.64722	2.1829	1.28771	1.7873	2.6602	1.37571	1.94468	2.98398	1.07275	1.64545	2.50477	1.21492	1.77861	2.38776	1.18966	1.66182	2.36154	1.10116	1.66916	2.31936	1.23276	1.70799	2.74079	1.19224	1.66114	2.92866	1.21828	1.66439	2.37712	1.19224	1.66114	2.73081	0.863868	1.32143	3.60522	1.18513	1.48158	2.02141	1.057	1.57461	2.28916	1.09755	1.4015	2.27425	1.057
PE(P-16:0/22:5) µmol/L	0.814574	1.07914	1.50809	0.738705	0.964555	1.21477	0.886376	1.23783	1.80994	0.786613	1.09989	1.57671	0.821977	1.11626	1.53098	0.768162	1.0095	1.37875	0.904847	1.21579	1.7401	1.0693	1.24201	2.01759	0.962651	1.33803	2.12051	0.922438	1.28811	1.55874	0.917653	1.21975	1.86763	1.02653	1.28811	1.58652	0.711435	0.808889	2.05402	0.740551	0.821177	0.986932	0.971392	1.22358	1.7502	0.720805	0.811484	1.01412	0.971392
PE(P-16:0/22:6) µmol/L	0.294695	0.50454	0.874825	0.247498	0.381283	0.551249	0.475409	0.689813	1.00894	0.267837	0.430649	0.957253	0.319213	0.564952	0.887615	0.254429	0.409291	0.674447	0.419248	0.703466	1.13705	0.588822	0.766151	1.43621	0.419046	0.710401	1.61978	0.397726	0.701733	0.860623	0.41949	0.705382	1.29865	0.448065	0.701733	0.860732	0.177052	0.542729	1.21729	0.162677	0.27995	0.607861	0.428307	0.597068	1.08518	0.173809	0.426483	1.10523	0.428307
PE(P-16:1/18:1) µmol/L	0.0532376	0.0678465	0.0895038	0.052877	0.0719054	0.0901899	0.0468817	0.0633165	0.098917	0.0649899	0.0889178	0.104968	0.0501903	0.0675283	0.0895038	0.0533996	0.0771522	0.0955043	0.0487099	0.0741368	0.0992149	0.0400891	0.0814028	0.11095	0.0499956	0.0711485	0.113248	0.0514225	0.0615271	0.0859755	0.049481	0.0737162	0.0993651	0.0492514	0.0648821	0.0875025	0.0525253	0.0918772	0.116201	0.049624	0.0749114	0.095787	0.0681501	0.0890765	0.1072	0.056312	0.0895396	0.100504	0.0681501
PE(P-18:0/16:0) µmol/L	0.502277	0.699589	1.00029	0.457817	0.552726	0.901619	0.532084	0.729621	0.997769	0.473989	0.695674	1.00171	0.517685	0.707456	1.00029	0.470945	0.639668	0.912447	0.580049	0.7803	1.17945	0.614845	0.682371	1.18256	0.512753	0.703436	1.29415	0.523487	0.727069	0.859737	0.572717	0.758221	1.18211	0.545306	0.687788	0.859737	0.491914	0.728416	1.06377	0.444394	0.609971	0.837479	0.556024	0.726012	0.995346	0.513173	0.669193	0.952632	0.556024
PE(P-18:0/16:1) µmol/L	0.0528817	0.0843601	0.127945	0.051433	0.0715915	0.110791	0.0623929	0.0889458	0.156704	0.0654879	0.107724	0.179675	0.0560679	0.085162	0.129535	0.0562341	0.0803626	0.125741	0.0634088	0.103509	0.159511	0.0760312	0.108894	0.159173	0.069869	0.120517	0.274316	0.0611853	0.106895	0.13924	0.0646205	0.107026	0.173678	0.0742679	0.106895	0.143404	0.0546471	0.0855633	0.107915	0.0541041	0.062589	0.0736763	0.0674695	0.113122	0.142624	0.0555151	0.067237	0.0956575	0.0674695
PE(P-18:0/18:1) µmol/L	2.50329	3.85764	5.33272	2.27753	3.07637	4.81396	2.8632	3.80853	5.65733	2.70566	4.27751	6.38906	2.62008	3.82963	5.38952	2.49462	3.50555	5.27966	3.0541	4.2076	6.34629	3.55761	4.65794	5.89449	3.20112	4.56271	8.49021	2.85137	4.82663	5.4784	3.11154	4.26186	6.49538	3.09221	4.82663	5.4784	2.37481	4.09608	4.45819	2.28285	2.78758	4.02501	3.49282	4.97191	5.8438	2.32463	3.62654	4.39411	3.49282
PE(P-18:0/18:2) µmol/L	5.5097	6.80341	8.96662	4.85809	6.47987	9.32494	5.16845	7.26197	9.25152	5.55626	7.89823	12.1188	5.38682	6.85429	8.96662	4.94307	6.94876	9.66291	5.47536	7.87821	10.0205	6.22725	8.13037	9.07206	5.31838	6.7952	10.4373	5.92997	7.90403	8.73797	5.46866	7.79371	10.0481	5.9566	8.02634	8.73797	4.57605	8.67516	10.6464	5.3176	6.19502	6.71644	7.21017	9.77393	14.5533	5.01073	6.71644	8.74481	7.21017
PE(P-18:0/18:3) µmol/L	0.0830347	0.128814	0.198381	0.0704804	0.108519	0.190509	0.0936213	0.143714	0.20014	0.0923939	0.176844	0.253427	0.0858065	0.130256	0.197524	0.0745847	0.115511	0.217616	0.0970506	0.164996	0.25117	0.136375	0.17198	0.223584	0.0999733	0.177713	0.31255	0.114897	0.174683	0.199882	0.0978487	0.167169	0.25743	0.12795	0.174683	0.199882	0.0831362	0.115625	0.13153	0.0599866	0.0882212	0.102403	0.151283	0.18453	0.294489	0.0715487	0.102403	0.121543	0.151283
PE(P-18:0/20:1) µmol/L	0.0687255	0.0910178	0.125897	0.059996	0.0764755	0.106985	0.0786366	0.108568	0.15604	0.0758538	0.103626	0.143319	0.0702105	0.0947076	0.126948	0.0614877	0.0883606	0.120145	0.0723977	0.104887	0.14687	0.0815094	0.101503	0.139557	0.0722041	0.116698	0.210864	0.078843	0.102802	0.152071	0.072344	0.109205	0.155943	0.0793435	0.102802	0.147884	0.0624403	0.0798848	0.117532	0.0553055	0.0795937	0.0882797	0.0967599	0.124577	0.208173	0.0636683	0.0797392	0.111146	0.0967599
PE(P-18:0/20:2) µmol/L	0.0888256	0.119105	0.153238	0.0818575	0.114948	0.133123	0.107901	0.13159	0.181561	0.0966233	0.122348	0.154887	0.0914838	0.123336	0.162119	0.0929422	0.1178	0.145911	0.102987	0.133858	0.172767	0.116851	0.153175	0.196885	0.104167	0.135345	0.196013	0.0949898	0.127362	0.151828	0.103587	0.133886	0.174887	0.103904	0.130977	0.155746	0.0739434	0.0979831	0.175516	0.0822209	0.0912641	0.120667	0.104096	0.147306	0.172645	0.0818029	0.0946236	0.135823	0.104096
PE(P-18:0/20:3) µmol/L	1.04962	1.49651	2.06563	0.893409	1.31505	1.74263	1.15106	1.49342	2.38721	0.940435	1.43762	2.42725	1.08259	1.49651	2.08655	0.926897	1.35196	1.96474	1.2612	1.58651	2.26205	1.36919	1.82817	2.48736	1.04225	1.88066	2.41119	1.31376	1.63825	1.96875	1.17179	1.5955	2.29761	1.33398	1.68665	2.11903	0.730574	1.33221	2.00524	1.07789	1.32333	1.50276	1.21924	2.26415	2.78556	1.04887	1.32777	1.53203	1.21924
PE(P-18:0/20:4) µmol/L	4.89252	8.07738	11.3889	4.80109	6.42865	9.95043	5.0651	6.9389	12.1209	5.87898	7.39265	11.1902	4.97533	7.87507	11.6792	4.93007	7.10703	10.2704	5.77233	8.83028	12.2906	5.70044	7.95442	11.8524	6.63427	8.85331	13.0226	5.17071	7.66411	9.57088	5.89002	8.85331	12.2923	5.31336	7.66411	10.3459	4.62176	7.48067	12.2122	5.19623	5.68197	8.75501	5.89013	7.48176	10.057	4.99724	6.31433	10.5889	5.89013
PE(P-18:0/20:5) µmol/L	0.269888	0.524891	1.06183	0.181911	0.273604	0.442642	0.437854	0.907757	1.44104	0.199605	0.37249	0.71153	0.295342	0.572147	1.22971	0.183124	0.326797	0.608625	0.340833	0.841563	1.56373	0.622456	1.28753	2.70703	0.553081	0.938963	2.65503	0.479723	0.590997	1.14435	0.361287	0.865157	1.85868	0.504587	0.667953	1.45147	0.158648	0.625288	1.25271	0.148973	0.178924	0.335643	0.394424	0.53766	1.3355	0.159508	0.214802	0.802038	0.394424
PE(P-18:0/22:4) µmol/L	0.611168	1.04217	1.81226	0.801181	1.09911	1.77029	0.717028	1.12218	1.71312	0.8079	1.32696	1.97854	0.657046	1.05962	1.78458	0.801309	1.18135	1.80475	0.661758	1.02914	1.55511	0.522116	0.86679	1.40308	0.85004	1.08482	1.53809	0.643203	0.840579	1.94459	0.709663	1.06057	1.54504	0.643203	0.851935	1.67623	0.545608	1.01473	2.63216	0.849606	1.09257	1.29438	0.576866	0.849141	1.37549	0.76688	1.05365	1.30301	0.576866
PE(P-18:0/22:5) µmol/L	0.730528	0.940146	1.25102	0.660316	0.903709	1.13891	0.749461	0.99071	1.50779	0.759647	0.986329	1.32935	0.730528	0.969365	1.27301	0.699187	0.94156	1.20709	0.786237	1.03764	1.37974	0.986401	1.17945	1.59598	0.813024	1.21983	1.87274	0.814303	1.06403	1.25201	0.790257	1.06681	1.48073	0.904267	1.06403	1.32678	0.575222	0.673225	1.50191	0.664977	0.692601	0.795149	0.831414	1.02572	1.48796	0.652494	0.682913	0.862871	0.831414
PE(P-18:0/22:6) µmol/L	0.546646	0.901422	1.435	0.419126	0.607127	1.09264	0.722092	1.06317	1.52546	0.467082	0.837769	1.23506	0.563479	0.926299	1.44055	0.443262	0.685285	1.13112	0.720379	1.22194	1.98514	0.911893	1.31045	2.01057	0.657273	1.23161	2.66651	0.731311	1.14194	1.48481	0.715171	1.223	2.06742	0.757477	1.1571	1.56649	0.452524	1.13393	2.20182	0.333172	0.548853	0.932898	0.754353	1.06571	1.52833	0.363817	0.780771	1.61773	0.754353
PE(P-18:1/16:0) µmol/L	0.491414	0.773513	1.12797	0.442933	0.628133	0.92237	0.499883	0.742739	1.23568	0.564978	0.791029	1.27024	0.492004	0.771997	1.157	0.476858	0.727663	1.04909	0.530018	0.832433	1.28825	0.549495	0.682788	1.34604	0.512021	0.820991	1.85522	0.482087	0.668038	0.949045	0.523281	0.82128	1.35342	0.500411	0.668038	0.949045	0.573212	0.838346	1.04948	0.429566	0.648338	1.16213	0.474313	0.832708	1.21473	0.561389	0.770372	1.04013	0.474313
PE(P-18:1/16:1) µmol/L	0.0400796	0.0639812	0.0787443	0.0458149	0.0571089	0.090517	0.0442839	0.0620536	0.0844057	0.0502787	0.0713688	0.101539	0.0413575	0.0639812	0.0787443	0.0487703	0.0645673	0.0961612	0.0456645	0.0701754	0.0934521	0.0553074	0.0735201	0.098338	0.0561067	0.073103	0.116269	0.0457002	0.0579299	0.083618	0.0474619	0.0704558	0.100105	0.0506454	0.0652803	0.0868779	0.0521578	0.0807886	0.0999738	0.0460246	0.0583673	0.0693316	0.0495831	0.0694088	0.0820505	0.0490115	0.068621	0.088174	0.0495831
PE(P-18:1/18:0) µmol/L	0.0617151	0.0807435	0.111445	0.0565063	0.070793	0.116171	0.062754	0.0927932	0.114655	0.066586	0.0822602	0.125587	0.0624112	0.0832175	0.111445	0.0603824	0.0778808	0.11637	0.0689749	0.08978	0.122459	0.0830894	0.106683	0.131051	0.063881	0.0859003	0.140049	0.0671538	0.0822508	0.11026	0.0660703	0.0897317	0.129839	0.0715944	0.0868201	0.115751	0.0697229	0.0938545	0.170407	0.0706091	0.100069	0.107194	0.0650349	0.100216	0.128164	0.071149	0.0942004	0.109606	0.0650349
PE(P-18:1/18:1) µmol/L	0.763021	1.19334	1.72725	0.759516	1.11194	1.5525	0.836139	1.04203	1.6741	0.84725	1.25557	1.68851	0.787739	1.17018	1.72725	0.780361	1.12539	1.62957	0.881753	1.25934	1.77572	0.855445	1.2288	2.06381	0.806499	1.26062	2.09556	0.917197	1.30931	1.53669	0.879359	1.26062	1.83239	0.917197	1.30931	1.53669	0.871322	1.43388	2.05903	0.695982	1.33666	1.5983	0.957133	1.15976	1.84251	0.872825	1.43112	1.68421	0.957133
PE(P-18:1/18:2) µmol/L	2.92066	4.15773	5.22858	2.72455	4.08395	5.19286	2.86661	4.1257	5.99754	2.89891	4.29769	6.29599	2.92066	4.15773	5.30211	2.79268	4.21093	5.27366	3.38197	4.277	5.32491	2.68332	3.91542	6.03741	2.72977	4.04988	5.6294	3.02196	3.49002	5.20132	3.31322	4.23361	5.35124	3.02196	3.49782	5.3691	3.00136	4.92756	5.17237	2.39058	4.39369	4.49644	3.0343	4.75167	6.63775	3.01091	4.40068	5.08477	3.0343
PE(P-18:1/18:3) µmol/L	0.0546105	0.076776	0.110087	0.0546028	0.0701922	0.102462	0.0581516	0.0875047	0.124521	0.0543746	0.091505	0.128009	0.0550292	0.0779267	0.112746	0.054474	0.0781295	0.109502	0.0564323	0.0786108	0.109246	0.0961665	0.107173	0.120105	0.0391435	0.0821512	0.107695	0.0645041	0.0810884	0.1074	0.0532555	0.0788733	0.10841	0.0753101	0.0879855	0.117209	0.0739874	0.0789958	0.0992577	0.0693725	0.0791672	0.113516	0.0814167	0.126103	0.182941	0.0743645	0.0790815	0.0975093	0.0814167
PE(P-18:1/20:1) µmol/L	0.029702	0.0378851	0.0527548	0.0287896	0.0381041	0.0480517	0.0322076	0.0419939	0.0648452	0.0302568	0.0460922	0.0611659	0.0299526	0.0382805	0.0540728	0.0298817	0.0393673	0.0527251	0.0346516	0.0426954	0.0596367	0.0273444	0.0406489	0.067755	0.0328043	0.0427286	0.0680488	0.0391222	0.0428987	0.052066	0.0342216	0.0427286	0.0609291	0.0389112	0.042516	0.0528298	0.0318939	0.0449044	0.0638513	0.0167474	0.037874	0.0467094	0.0316374	0.0564487	0.0867315	0.0314611	0.038199	0.0531642	0.0316374
PE(P-18:1/20:2) µmol/L	0.0378526	0.0507728	0.066045	0.037025	0.0483377	0.0587752	0.0354713	0.0607805	0.0774306	0.035764	0.057664	0.0760158	0.0369702	0.051583	0.0672868	0.036687	0.0500844	0.0686025	0.0405898	0.0549513	0.077117	0.0356766	0.0493524	0.0864808	0.0423098	0.0528259	0.0727868	0.0385817	0.0483352	0.0680121	0.0412806	0.0548491	0.0764923	0.037794	0.0483352	0.0680121	0.0383097	0.0507035	0.0655744	0.0282872	0.0424261	0.0796239	0.0391494	0.0594904	0.0758871	0.0375456	0.0465648	0.0678351	0.0391494
PE(P-18:1/20:3) µmol/L	0.687954	0.979406	1.36787	0.610877	0.880659	1.17669	0.611179	1.0087	1.7384	0.78091	0.981989	1.42036	0.678832	0.979406	1.39558	0.641343	0.909638	1.25128	0.771364	1.11055	1.50941	0.860555	1.03269	1.53584	0.792068	1.05916	1.81999	0.755337	1.01585	1.61748	0.783816	1.10856	1.55613	0.844131	1.01585	1.6111	0.581932	0.85491	1.93903	0.621131	0.99626	1.06283	0.722815	1.32567	1.8704	0.629247	0.856607	1.07905	0.722815
PE(P-18:1/20:4) µmol/L	3.14799	4.14599	5.74472	2.93696	3.57688	5.07572	3.29104	3.92582	5.98403	2.89264	3.78441	5.5185	3.16488	4.09815	5.75314	2.92341	3.63531	5.38963	3.17495	4.55464	6.12497	3.2891	3.93658	6.25132	3.44293	4.4996	5.60048	2.96915	3.63106	4.91716	3.28617	4.4996	6.07179	3.12175	3.63106	5.22103	2.59489	4.08819	4.54499	2.50971	3.24804	5.49856	2.88878	3.76355	5.16797	2.66402	3.66812	4.53052	2.88878
PE(P-18:1/20:5) µmol/L	0.151424	0.26018	0.596588	0.0772694	0.139137	0.275812	0.289947	0.502025	0.841147	0.118345	0.209455	0.348305	0.158478	0.302511	0.641758	0.0943405	0.170454	0.280058	0.180844	0.463691	0.923551	0.25927	0.844427	1.55071	0.242723	0.569539	1.39547	0.214105	0.369197	0.712454	0.186436	0.506367	0.974268	0.219466	0.414624	1.01036	0.0739371	0.367838	0.535687	0.0613022	0.0971934	0.184149	0.16867	0.329632	0.720542	0.0713963	0.0990437	0.413386	0.16867
PE(P-18:1/22:4) µmol/L	0.111582	0.243256	0.428613	0.241038	0.327245	0.46417	0.114601	0.154451	0.257317	0.213998	0.274534	0.587859	0.113455	0.216739	0.414008	0.230629	0.319953	0.512926	0.116731	0.200606	0.34616	0.091879	0.17105	0.290942	0.128481	0.177541	0.330399	0.0997913	0.168729	0.280101	0.123589	0.200261	0.334494	0.0968615	0.168729	0.272165	0.219178	0.341113	0.376732	0.220887	0.304237	0.440015	0.107998	0.154196	0.283694	0.238649	0.325233	0.376569	0.107998
PE(P-18:1/22:5) µmol/L	0.465927	0.58497	0.745062	0.396108	0.532492	0.718448	0.458469	0.549336	0.729477	0.478367	0.589575	0.811466	0.465927	0.582822	0.741744	0.431043	0.567826	0.737429	0.495577	0.62159	0.797294	0.574293	0.664324	0.80183	0.486421	0.665514	0.901972	0.475833	0.594749	0.794275	0.489287	0.644858	0.803296	0.487018	0.614041	0.794275	0.423322	0.501918	0.891852	0.394821	0.43879	0.565516	0.369714	0.62708	0.704139	0.416187	0.474314	0.570685	0.369714
PE(P-18:1/22:6) µmol/L	0.2764	0.393992	0.55507	0.255137	0.339068	0.478802	0.307972	0.40473	0.5744	0.257637	0.363155	0.538433	0.293266	0.393992	0.564791	0.258773	0.343602	0.535042	0.333826	0.464574	0.729726	0.396568	0.467948	0.906246	0.314801	0.443746	0.705439	0.28549	0.428963	0.54575	0.333296	0.46037	0.715307	0.319527	0.45504	0.547741	0.312424	0.553128	0.980752	0.198764	0.275043	0.511392	0.299154	0.355395	0.532963	0.269995	0.425445	0.666748	0.299154
PE(P-18:2/18:2) µmol/L	0.197499	0.279854	0.413991	0.213616	0.296638	0.453334	0.176251	0.288895	0.431857	0.190563	0.366928	0.540297	0.195484	0.280477	0.417647	0.211275	0.305844	0.480086	0.227768	0.315207	0.427356	0.199377	0.298015	0.424309	0.216006	0.303043	0.406938	0.190241	0.261796	0.339925	0.218315	0.314699	0.42083	0.191781	0.262452	0.374421	0.208911	0.320055	0.436303	0.20586	0.327158	0.406275	0.227127	0.466766	0.680329	0.223851	0.323607	0.434755	0.227127
PE(P-18:2/20:4) µmol/L	0.165357	0.233693	0.308287	0.155163	0.216632	0.309912	0.143718	0.240959	0.343043	0.163376	0.263959	0.372342	0.163758	0.233693	0.31294	0.155657	0.225394	0.318374	0.18627	0.264315	0.355209	0.177281	0.295016	0.340328	0.179249	0.25891	0.355917	0.161354	0.199268	0.272768	0.183754	0.264162	0.354897	0.161354	0.213556	0.29005	0.112481	0.200622	0.269186	0.135115	0.145231	0.35164	0.129099	0.256995	0.497149	0.134246	0.170931	0.256582	0.129099
PE(P-18:2/22:6) µmol/L	0.0117426	0.0204151	0.0314866	0.00864305	0.0146827	0.0227606	0.0127963	0.02505	0.0325986	0.00834199	0.017678	0.0325472	0.0118358	0.0211775	0.0316863	0.0086108	0.0149624	0.0242932	0.0145122	0.0237549	0.0359185	0.0154139	0.0400989	0.0457402	0.0155438	0.0232927	0.0365267	0.0114765	0.0194485	0.0346744	0.0146164	0.0232927	0.0359306	0.011879	0.0221618	0.0409896	0.013627	0.0170873	0.0408293	0.0054635	0.0137826	0.0276418	0.0109224	0.028957	0.0493124	0.011602	0.015441	0.0335049	0.0109224
L_Carnitine (µmol/L)	17.1033	22.3897	27.521	12.8121	17.5213	24.1104	18.9114	23.5311	29.873	17.0901	19.874	25.7218	17.6064	22.6913	28.2454	14.6597	18.1734	24.3103	16.5913	24.6693	30.4833	20.6235	30.0234	45.9968	19.4332	26.022	33.9211	20.1222	26.1575	34.5459	17.5854	24.8091	31.964	20.1222	28.0616	34.907	22.8013	26.6207	33.9069	27.5784	28.8012	32.6757	20.5983	28.378	38.4786	23.6217	28.8012	33.7339	20.5983
AC2:0 (µmol/L)	4.53314	5.8221	7.65555	4.10188	5.60645	8.07642	4.80095	5.99075	7.66263	5.07413	7.80316	9.68276	4.55728	5.86897	7.65555	4.43746	5.75607	9.20127	5.4946	6.97211	8.97728	6.69871	8.8802	11.0387	6.36659	7.3331	10.4179	5.79143	8.1717	12.7229	5.54689	7.09465	9.42747	6.14645	8.1717	11.8759	7.33106	10.9087	18.8805	6.38734	9.24933	14.0236	9.57678	13.6936	17.167	7.71479	9.24933	17.0163	9.57678
AC3:0 (µmol/L)	0.21177	0.309877	0.434191	0.157725	0.216746	0.282737	0.261287	0.43137	0.561202	0.2217	0.30722	0.365745	0.215938	0.315641	0.459634	0.176402	0.248547	0.33334	0.213237	0.341764	0.465643	0.216471	0.390224	0.529572	0.28932	0.428294	0.55967	0.243009	0.388403	0.519076	0.229425	0.361044	0.494417	0.243009	0.388403	0.527015	0.311235	0.41777	0.502366	0.296865	0.524215	0.631878	0.277586	0.503275	0.700376	0.330308	0.470514	0.557742	0.277586
AC4:0 (µmol/L)	0.0899194	0.132231	0.170815	0.0673686	0.104192	0.145332	0.101814	0.148775	0.24055	0.0991975	0.135046	0.175579	0.0901966	0.136967	0.182971	0.0843539	0.115043	0.167879	0.124347	0.172029	0.245845	0.102485	0.160008	0.299764	0.138422	0.199055	0.29165	0.117371	0.153498	0.281533	0.127773	0.174041	0.25087	0.114659	0.153498	0.287857	0.203239	0.251365	0.312661	0.181917	0.242424	0.644732	0.183991	0.30794	0.45861	0.21554	0.242424	0.336589	0.183991
AC5:0 (µmol/L)	0.0585989	0.0870018	0.1125	0.0437275	0.0625141	0.0993539	0.0658859	0.0992658	0.130046	0.0537287	0.0804667	0.100382	0.0600839	0.0885016	0.119249	0.0484567	0.0689569	0.0995694	0.0660872	0.0944878	0.12912	0.0513678	0.0865645	0.0978717	0.0742467	0.106401	0.154382	0.0541851	0.0943369	0.143056	0.0682673	0.101745	0.131731	0.0541851	0.0890998	0.128052	0.0941026	0.116526	0.185692	0.0754083	0.0770893	0.169568	0.107901	0.163026	0.233842	0.0770893	0.112765	0.182665	0.107901
AC6:0 (µmol/L)	0.0156962	0.0217948	0.0312256	0.0167539	0.0220621	0.0303716	0.018399	0.0255325	0.0348728	0.0187716	0.0319671	0.0548998	0.016145	0.0218191	0.0323263	0.018232	0.0248435	0.0376272	0.0199606	0.028389	0.0389669	0.019172	0.0325943	0.0485612	0.0191513	0.0306639	0.0477779	0.0181233	0.0373062	0.0504732	0.0199168	0.0287402	0.0403488	0.0188937	0.0365551	0.0502445	0.0157105	0.0396358	0.07198	0.020085	0.0335111	0.0452195	0.0383333	0.0752675	0.113926	0.0194047	0.0335111	0.0553182	0.0383333
AC8:0 (µmol/L)	0.0500475	0.0769991	0.102572	0.0579084	0.0811611	0.106613	0.0485143	0.0799468	0.128571	0.060532	0.093645	0.171019	0.0499595	0.0769991	0.103241	0.0609309	0.0829883	0.130757	0.0628429	0.0882377	0.133702	0.043353	0.0942461	0.180349	0.0645998	0.108228	0.140153	0.0613316	0.0860591	0.15678	0.0633967	0.0924207	0.135962	0.0613316	0.0860591	0.162355	0.0474992	0.123254	0.172076	0.0592166	0.0739027	0.113492	0.106989	0.187485	0.316828	0.0574299	0.0888619	0.157645	0.106989
AC8:1 (µmol/L)	0.0512687	0.0834743	0.124042	0.0614938	0.085653	0.12919	0.0680999	0.0875991	0.126589	0.0674177	0.119022	0.18049	0.0549975	0.0854529	0.124042	0.0635243	0.0908084	0.143058	0.0484639	0.102566	0.154544	0.0440442	0.0884188	0.174792	0.0757285	0.0953075	0.152503	0.0478263	0.130947	0.197372	0.0520157	0.0991124	0.152732	0.0447074	0.121874	0.185713	0.125094	0.146665	0.218979	0.154822	0.186501	0.338968	0.097417	0.321307	0.409055	0.129414	0.174527	0.201339	0.097417
AC10:0 (µmol/L)	0.106527	0.16364	0.235532	0.1284	0.181407	0.2451	0.118766	0.174359	0.282843	0.118456	0.20033	0.37256	0.110598	0.16364	0.238503	0.125867	0.182177	0.288954	0.147112	0.216447	0.337148	0.0995636	0.215099	0.424722	0.149402	0.229557	0.322516	0.137879	0.225363	0.369042	0.148402	0.216713	0.332188	0.132463	0.225363	0.374882	0.118451	0.254748	0.340245	0.121886	0.144899	0.222866	0.245817	0.398451	0.617107	0.130711	0.205172	0.304324	0.245817
AC10:1 (µmol/L)	0.0395488	0.0677058	0.107533	0.0721046	0.0946806	0.124401	0.0400916	0.0795574	0.0978481	0.0563263	0.100941	0.168521	0.0399532	0.0689678	0.106044	0.0648206	0.0953293	0.130744	0.0469099	0.0738479	0.111592	0.0272464	0.0807282	0.113831	0.0423727	0.064464	0.100775	0.036041	0.0829782	0.110657	0.0457885	0.0707173	0.108614	0.0317388	0.0829782	0.110657	0.0347386	0.0959883	0.184561	0.0816069	0.0938799	0.160836	0.0745492	0.183124	0.378577	0.0755005	0.0938799	0.182989	0.0745492
AC12:0-OH (µmol/L)	0.00283655	0.00429854	0.00608016	0.00347619	0.00505301	0.00682193	0.00308463	0.00417024	0.00661756	0.0027803	0.00485299	0.00862573	0.00287998	0.00422568	0.00608016	0.00313829	0.00496951	0.00733743	0.00355963	0.00591423	0.00863321	0.00317838	0.00481446	0.00886852	0.00440483	0.00630096	0.00903098	0.00346754	0.00506203	0.00922346	0.00360815	0.00604973	0.00868405	0.00335303	0.00506203	0.00901015	0.00530463	0.00883	0.0106822	0.00473913	0.00543629	0.00682463	0.00465422	0.0115606	0.0154141	0.00501378	0.00652732	0.00934273	0.00465422
AC12:0 (µmol/L)	0.0319985	0.0515705	0.0837526	0.0462222	0.0670657	0.0918397	0.0389769	0.0507181	0.0757735	0.0414859	0.0691138	0.138849	0.0324918	0.0515705	0.0825418	0.0449977	0.0670657	0.107995	0.048724	0.0691828	0.108489	0.0343468	0.0863706	0.140146	0.0451893	0.0676968	0.111133	0.0311071	0.0684405	0.105814	0.0468196	0.0691206	0.10893	0.0319699	0.0695134	0.114892	0.0414725	0.11771	0.144296	0.0449209	0.0531322	0.0652928	0.0940635	0.126101	0.195316	0.0490167	0.0612244	0.128043	0.0940635
AC12:1 (µmol/L)	0.0303135	0.0539885	0.0836415	0.052409	0.0811243	0.108112	0.0304185	0.0441105	0.0670833	0.0483281	0.0643621	0.158571	0.0303135	0.0525821	0.0818976	0.0493905	0.0770244	0.120696	0.0419044	0.0608823	0.10102	0.022458	0.0799486	0.120724	0.0360407	0.059551	0.106318	0.0286211	0.0517909	0.124201	0.040791	0.0599452	0.101352	0.0249226	0.0576016	0.116916	0.0387664	0.112002	0.187519	0.0623754	0.073899	0.097682	0.0848663	0.122147	0.193849	0.0537153	0.0856259	0.11529	0.0848663
AC14:0-OH (µmol/L)	0.00450583	0.00731451	0.0120539	0.00445709	0.00726859	0.0181594	0.00325417	0.00688472	0.0111517	0.00500924	0.00722967	0.0191895	0.00443744	0.0072738	0.0119579	0.00470765	0.00726859	0.0181056	0.00476353	0.0111557	0.023615	0.00679927	0.0109088	0.035583	0.00785137	0.0127566	0.0388179	0.0047162	0.0102426	0.0220076	0.00515344	0.0116649	0.0247807	0.00498107	0.0102426	0.0227085	0.00885791	0.0192353	0.099316	0.00702698	0.00900887	0.0105088	0.00643366	0.0104175	0.0185228	0.00722355	0.0106655	0.0270258	0.00643366
AC14:0 (µmol/L)	0.0148931	0.0250864	0.0439829	0.0138732	0.0258008	0.0649657	0.0144052	0.0207681	0.0366289	0.0155508	0.0261704	0.0924837	0.0147084	0.0238579	0.0417373	0.0143547	0.0258008	0.067263	0.0200062	0.0403166	0.0874294	0.0320934	0.0427441	0.125776	0.0256887	0.0416366	0.138847	0.0187207	0.0388605	0.0717658	0.0207313	0.0405831	0.0936478	0.0211635	0.0388605	0.0763141	0.0411133	0.0733958	0.212862	0.0162505	0.0244953	0.0371958	0.032947	0.0427018	0.092112	0.0168157	0.0455129	0.0939161	0.032947
AC14:1 (µmol/L)	0.0358541	0.0630965	0.115004	0.0338103	0.0823602	0.216187	0.0245516	0.0378875	0.104533	0.0423764	0.0742678	0.180251	0.0300678	0.0585156	0.114614	0.0386876	0.0762513	0.180251	0.0448392	0.0909603	0.217261	0.0415017	0.092544	0.211006	0.0568933	0.0947804	0.326975	0.0302658	0.104159	0.148176	0.0482674	0.0919766	0.233525	0.0303857	0.10148	0.16729	0.163565	0.285656	0.447687	0.0587212	0.0630832	0.133034	0.0742846	0.126529	0.207417	0.0608013	0.181205	0.311731	0.0742846
AC14:2 (µmol/L)	0.0158693	0.0271839	0.0589111	0.0214305	0.0424771	0.121607	0.00870709	0.0150338	0.0413008	0.0273813	0.0413055	0.0914174	0.0133005	0.0255372	0.0527351	0.0227645	0.0424619	0.0946726	0.0163512	0.0411942	0.0838429	0.0134364	0.03478	0.0699163	0.0187071	0.0362654	0.0864845	0.0107445	0.0375521	0.0654704	0.0170972	0.040119	0.0846244	0.0107445	0.0370162	0.0686563	0.0562333	0.089447	0.240653	0.029361	0.0353215	0.0842186	0.0293972	0.0602912	0.120287	0.0297375	0.0722538	0.10413	0.0293972
AC16:0-OH (µmol/L)	0.00409701	0.00667345	0.00925894	0.00386914	0.00660801	0.0100544	0.00355728	0.0062626	0.00835131	0.00455565	0.00698852	0.0135596	0.0040094	0.0065639	0.00880397	0.00433323	0.00660801	0.0111223	0.00406834	0.00814264	0.0139262	0.0065612	0.00789758	0.0155191	0.00627512	0.011064	0.017781	0.00486525	0.00824144	0.0148341	0.00443174	0.00898497	0.0151691	0.00580938	0.00800381	0.0152095	0.0059986	0.0105434	0.0247014	0.00363447	0.00640558	0.00686045	0.00651313	0.00993522	0.0144797	0.00488766	0.0066021	0.0123858	0.00651313
AC16:0 (µmol/L)	0.165688	0.25486	0.360823	0.173678	0.25247	0.394174	0.138347	0.238866	0.329594	0.15439	0.224443	0.491421	0.165126	0.239756	0.358845	0.158853	0.250951	0.426426	0.202476	0.327348	0.51114	0.308075	0.363467	0.526241	0.218259	0.357966	0.692607	0.209908	0.420441	0.513099	0.204215	0.337218	0.599687	0.234177	0.371772	0.513099	0.190006	0.326355	0.925147	0.154219	0.269524	0.343294	0.301552	0.380947	0.529868	0.209079	0.269524	0.409716	0.301552
AC16:1 (µmol/L)	0.0395366	0.06183	0.109785	0.0443349	0.0780647	0.128046	0.0317512	0.0556813	0.0975457	0.0416508	0.0712027	0.162901	0.0362156	0.0612688	0.104398	0.0424664	0.0735179	0.128673	0.0456226	0.0874062	0.170798	0.0628383	0.114036	0.137968	0.0584312	0.105149	0.213287	0.044953	0.0791091	0.198558	0.0469734	0.088574	0.174659	0.0485578	0.0892857	0.14803	0.0823568	0.173223	0.233514	0.0423918	0.0820547	0.132141	0.085644	0.108959	0.277301	0.0626566	0.102265	0.202661	0.085644
AC18:0 (µmol/L)	0.083022	0.15144	0.251418	0.0909456	0.132276	0.234278	0.0768034	0.132773	0.222997	0.0896714	0.133884	0.266798	0.0820554	0.148798	0.240821	0.0914698	0.133884	0.251695	0.101704	0.196747	0.319101	0.15061	0.224133	0.30194	0.116428	0.237805	0.435564	0.115288	0.249435	0.294925	0.112213	0.197263	0.346835	0.140151	0.249435	0.295002	0.0860835	0.136013	0.536308	0.0730979	0.0947395	0.140928	0.152232	0.200876	0.320962	0.0848828	0.0980511	0.183805	0.152232
AC18:1 (µmol/L)	0.313746	0.502746	0.773757	0.319224	0.544196	0.885071	0.26123	0.464821	0.595917	0.30285	0.483689	0.99096	0.309431	0.483724	0.73824	0.312753	0.52832	0.907134	0.358897	0.580245	1.13293	0.514514	0.584219	1.05872	0.378226	0.644109	1.21729	0.353219	0.64952	0.929185	0.367547	0.582216	1.15433	0.39451	0.617069	0.947262	0.480142	0.812817	1.72626	0.280952	0.621667	0.914601	0.529058	0.724278	1.05981	0.336537	0.701394	1.12781	0.529058
AC18:2 (µmol/L)	0.0868439	0.16184	0.23147	0.121227	0.150789	0.283878	0.0644105	0.117397	0.172249	0.101483	0.140722	0.256738	0.0841866	0.143911	0.213223	0.119703	0.146804	0.272945	0.0986668	0.161444	0.273451	0.136454	0.174861	0.25243	0.0957334	0.142069	0.309333	0.103723	0.158784	0.236017	0.0981508	0.159843	0.282837	0.106744	0.158784	0.236017	0.148823	0.274811	0.381245	0.0816072	0.258591	0.416553	0.164687	0.237185	0.367119	0.0903114	0.258591	0.353893	0.164687
AC18:2-OH (µmol/L)	0.00449719	0.00734569	0.0115171	0.00511173	0.00871547	0.0147283	0.00295766	0.00652256	0.0106268	0.0038982	0.0098798	0.0132088	0.00426649	0.00734028	0.0110463	0.00454507	0.00886818	0.0144547	0.00499786	0.0101705	0.0197123	0.00754905	0.0108241	0.0189112	0.00849125	0.0131842	0.0225052	0.00465158	0.011764	0.0167274	0.00543184	0.0106312	0.020281	0.00593374	0.011764	0.0167274	0.0112303	0.0179199	0.0274527	0.00485632	0.00682656	0.0107972	0.00713215	0.0117096	0.0160474	0.00666222	0.0121097	0.0198913	0.00713215
AC20:0 (µmol/L)	0.00689982	0.0128639	0.0203375	0.00583685	0.0108804	0.0178628	0.00678213	0.0104937	0.0189978	0.00691472	0.01226	0.027008	0.00689982	0.0126667	0.019687	0.00611925	0.0110926	0.0191961	0.00792543	0.0144316	0.0284732	0.0133507	0.016919	0.0276564	0.0105101	0.0192274	0.0310638	0.0111317	0.0162379	0.0267222	0.00822822	0.0155482	0.0291407	0.0118128	0.0165262	0.0263659	0.00689238	0.0131922	0.0397227	0.0041278	0.00732972	0.0136395	0.01108	0.0196917	0.033293	0.00633476	0.00932488	0.0179541	0.01108
AC20:1 (µmol/L)	0.0160733	0.0288972	0.0452955	0.0144921	0.0228365	0.0387569	0.0186202	0.0282285	0.038971	0.0147749	0.0278542	0.0476089	0.0161984	0.0288909	0.0437969	0.0147566	0.0233	0.0397449	0.0198934	0.0359695	0.0635993	0.0282772	0.0370942	0.0561365	0.0210135	0.0520489	0.0850088	0.0250191	0.0500713	0.0611595	0.0201031	0.0375516	0.0694823	0.0262956	0.0397863	0.0597338	0.020175	0.0274736	0.0925875	0.0125958	0.0214139	0.0326607	0.0341459	0.0579816	0.0731793	0.016407	0.0240728	0.035732	0.0341459
AC20:2 (µmol/L)	0.0052787	0.00891023	0.0131335	0.00621285	0.0080802	0.0143755	0.00449963	0.00874078	0.012031	0.00557996	0.00809299	0.0170669	0.00519011	0.0088538	0.012663	0.00591927	0.0080802	0.0147077	0.00596769	0.0101758	0.0160066	0.00368806	0.00809136	0.0176365	0.00612517	0.0131548	0.0165523	0.00605438	0.0123354	0.0181521	0.00610888	0.0105025	0.0161716	0.00596442	0.00948286	0.0181521	0.00701863	0.010765	0.024652	0.00529996	0.0100326	0.0181854	0.00926857	0.0191352	0.0246464	0.00586098	0.0100326	0.0198331	0.00926857
AC20:3 (µmol/L)	0.00190475	0.0031588	0.00519206	0.00207203	0.00285808	0.00549608	0.00142403	0.00267019	0.00381765	0.00169419	0.00304563	0.00688588	0.0018225	0.00309345	0.00481131	0.00206667	0.00289163	0.0057878	0.00198957	0.00306776	0.00596674	0.00231205	0.00275879	0.0047832	0.00225546	0.00320509	0.00659183	0.00207046	0.00362382	0.00721504	0.00212422	0.00315559	0.00609013	0.00226646	0.00354942	0.00681548	0.00213645	0.00530405	0.00885081	0.0019114	0.00466584	0.0108922	0.00375882	0.00546523	0.0081463	0.00194291	0.00466584	0.0101438	0.00375882
AC20:4 (µmol/L)	0.00318882	0.00549389	0.00990258	0.00321339	0.00438223	0.0095887	0.00341129	0.00575675	0.00894673	0.00326795	0.00507137	0.0121141	0.00326446	0.00549389	0.00963235	0.00323876	0.00481117	0.0100795	0.00394707	0.00704654	0.0104647	0.00446567	0.00846547	0.00935033	0.00466606	0.00623794	0.0142484	0.00413711	0.00753541	0.0133385	0.00418468	0.00652903	0.0115221	0.00422226	0.00775268	0.0122539	0.00384541	0.00615088	0.0192728	0.00357916	0.00821764	0.0169134	0.00775449	0.0119724	0.0198758	0.00401999	0.00821764	0.0192703	0.00775449
[truncated: 2 more columns]
